# Supplementary material for: Large-scale deorphanization of Nematostella vectensis neuropeptide G protein-coupled receptors supports the independent expansion of bilaterian and cnidarian peptidergic systems
Source: eLife. 2024 May 10;12:RP90674. doi: 10.7554/eLife.90674 (PMC11087051; doi:10.7554/eLife.90674)
Supplement: Supplementary file 1. — The table contains the results of the mass spectrometry analysis including the name, sequence and identifier of the precursor sequences, N- and C-terminal flanking sequences, and peptide sequences. [file elife-90674-supp1.xlsx]

## Sheet: README
Please find below some general comments about the spreadsheet.
Confident/Uncertain/Poor identifications:
BOLDED PEPTIDE SEQUENCE	Bolded peptides indicates that the peptide is found on more than one propeptides
LC-MS PEAKS output data:
-10lgP	In PEAKS The P-value is converted to -10*log10(P-value) to make it more “human-friendly”. A more significant match will have a higher -10lgP value. A P-value of 1% is equivalent to -10lgP of 20.
Area	refers to the peptide feature area under the curve, for explanation please see https://www.bioinfor.com/tutorial-peptide-feature-area/
SignalP:
SignalP-6.0, Organism: Eukarya, Timestamp: 20220207161417
https://services.healthtech.dtu.dk/service.php?SignalP
Sequence alignments:
Fast multiple sequence alignments performed on https://www.genome.jp/tools-bin/clustalw

## Sheet: Confident
Precursor name	PROPEPTIDE	N-TERM_FLANK	PEPTIDE_SEQUENCE	C-TERM_FLANK	PROPEPTIDE_SEQUENCE	Format
LRWa3	HADP01262889.1	SA	GPPQGLRW	GKR	MASKTLLVCLLVTFMVLSIYTQESSAGPPQGLRWGKRWENPSEKQVRENAEREVQDFKDYFKKKYNRDLDI	0
HLSa	NVE1038	PA	QPPLSHLS	GKR	MKRRIHAILPVVALCVALSLANIDNGEMVERSGPAQPPLSHLSGKRASTWLRADPEQSIEMSRPLQPVDALEKGNSGKILQLDKVPMKMMIRQFGATPPSNIGRKRTNFRRYPPLNTVGKKREFCETREDIRNNAILD	1
LRWa1b	NVE11178|HADP01056499.1	DE	SPEKLVPMMKEYI	RR	MESKRLLVILVVCFALVAFAPSTEAQGLRWGREYDESPEKLVPMMKEYIRRQEELKKKREFSMN	0
LRWa1b	NVE11178|HADP01056499.1	DE	SPEKLVPMMKEYIRRQEEL	KK	MESKRLLVILVVCFALVAFAPSTEAQGLRWGREYDESPEKLVPMMKEYIRRQEELKKKREFSMN	0
	NVE11386	RN	LPNDALEEESEVAEKSPL	KK	MDVKLVAILFACTLFSLSFANGYRLESLRNLPNDALEEESEVAEKSPLKKRGCSDAFPVVCRSPSVKAACYNPNHRSHAFITDVCKHTCHLC	1
VRHa	NVE12742	EN	DEPGPPMIKIPVRH	GKR	MKITPVMSCLVLASALLVTAECYRITDPGDLEKPQENDEPGPPMIKIPVRHGKREFNDDLEGKLGSHACG	0
VRHa	NVE12742	ND	EPGPPMIKIPVRH	GKR	MKITPVMSCLVLASALLVTAECYRITDPGDLEKPQENDEPGPPMIKIPVRHGKREFNDDLEGKLGSHACG	0
VRHa	NVE12742	ND	EPGPPMIKIPVRHG	KR	MKITPVMSCLVLASALLVTAECYRITDPGDLEKPQENDEPGPPMIKIPVRHGKREFNDDLEGKLGSHACG	0
VRHa	NVE12742	EP	GPPMIKIPVRH	GKR	MKITPVMSCLVLASALLVTAECYRITDPGDLEKPQENDEPGPPMIKIPVRHGKREFNDDLEGKLGSHACG	0
VRHa	NVE12742	GP	PMIKIPVRH	GKR	MKITPVMSCLVLASALLVTAECYRITDPGDLEKPQENDEPGPPMIKIPVRHGKREFNDDLEGKLGSHACG	0
FFKAa	NVE12918|HADO01001257.1	RR	QFNEGSVAEEEA	RK	MNRLALVLLCMFLTAVLMPNRVQGFFKAGRELKEKSADSNERRQFNEGSVAEEEARKEFLRALLRSAERRSKTDDYQ	1
	NVE13213	KR	EKLEEITGFAKMKKPYSS	RR	MNKISALLFLGCVVAITWAFPREETIAHLVNYRARLMASEGPENETRIEDAEELESKSSYLSKREKLEEITGFAKMKKPYSSRREKLEEMRAFDRKRQTKEQVICEGPAKLALESYHIDLSKSHLCGENSKRWANDFKSFLRKRELEYHMSSNYRRNMNACCSPDCDWLLQYLEVDSQVIKCVDKK	0
PIPa	NVE1473	GK	NPPQPPFRIPI	GRK	MESFVLLAVLTYSLVSCTLVTPQSSKEEVATRWSKDKYDYLPLIPHGESSDESDAFLENILRNDKTTYREKKGRVVHKGKNPPQPPFRIPIGRKRSNRVVIHTGANPTMAPFRIPGGRKRSNRVVIHTGANPTMAPFRIPIGRKRSNRVVIHTGANPTMAPLRIPFGRKRSNGVVVHTNPDLSDLDGDTPNVNIERAQKEEC	1
HIRa	NVE15069	HN	APPLDLSGPAYFHIR	GKR	MRLYLFVPVFALVLAVEGASDEKRDSKQPPIDLSPAAYFHIRGKRTHNAPPLDLSGPAYFHIRGKRTAKQPPYLDLGEPSFFHIRGKRTEGPPYIDLTEPSFFHIRGKRSSEQPPLDLGPAYFHIRGKRTKNPPIDLGPAYFHIRGKRLSGEQPPYLDLTPAYFHIRGKRTQQPPMIDLSEPAFFHIRGRRAVEQPPYLDLTPSYFHIRGREE	0
HIRa	NVE15069	LS	EPAFFHIR	GRR	MRLYLFVPVFALVLAVEGASDEKRDSKQPPIDLSPAAYFHIRGKRTHNAPPLDLSGPAYFHIRGKRTAKQPPYLDLGEPSFFHIRGKRTEGPPYIDLTEPSFFHIRGKRSSEQPPLDLGPAYFHIRGKRTKNPPIDLGPAYFHIRGKRLSGEQPPYLDLTPAYFHIRGKRTQQPPMIDLSEPAFFHIRGRRAVEQPPYLDLTPSYFHIRGREE	0
HIRa	NVE15069	LG	EPSFFHIR	GKR	MRLYLFVPVFALVLAVEGASDEKRDSKQPPIDLSPAAYFHIRGKRTHNAPPLDLSGPAYFHIRGKRTAKQPPYLDLGEPSFFHIRGKRTEGPPYIDLTEPSFFHIRGKRSSEQPPLDLGPAYFHIRGKRTKNPPIDLGPAYFHIRGKRLSGEQPPYLDLTPAYFHIRGKRTQQPPMIDLSEPAFFHIRGRRAVEQPPYLDLTPSYFHIRGREE	0
HIRa	NVE15069	DL	GEPSFFHIR	GKR	MRLYLFVPVFALVLAVEGASDEKRDSKQPPIDLSPAAYFHIRGKRTHNAPPLDLSGPAYFHIRGKRTAKQPPYLDLGEPSFFHIRGKRTEGPPYIDLTEPSFFHIRGKRSSEQPPLDLGPAYFHIRGKRTKNPPIDLGPAYFHIRGKRLSGEQPPYLDLTPAYFHIRGKRTQQPPMIDLSEPAFFHIRGRRAVEQPPYLDLTPSYFHIRGREE	0
HIRa	NVE15069	TE	GPPYIDLTEPSFFHIR	GKR	MRLYLFVPVFALVLAVEGASDEKRDSKQPPIDLSPAAYFHIRGKRTHNAPPLDLSGPAYFHIRGKRTAKQPPYLDLGEPSFFHIRGKRTEGPPYIDLTEPSFFHIRGKRSSEQPPLDLGPAYFHIRGKRTKNPPIDLGPAYFHIRGKRLSGEQPPYLDLTPAYFHIRGKRTQQPPMIDLSEPAFFHIRGRRAVEQPPYLDLTPSYFHIRGREE	0
HIRa	NVE15069	LD	LGPAYFHIR	GKR	MRLYLFVPVFALVLAVEGASDEKRDSKQPPIDLSPAAYFHIRGKRTHNAPPLDLSGPAYFHIRGKRTAKQPPYLDLGEPSFFHIRGKRTEGPPYIDLTEPSFFHIRGKRSSEQPPLDLGPAYFHIRGKRTKNPPIDLGPAYFHIRGKRLSGEQPPYLDLTPAYFHIRGKRTQQPPMIDLSEPAFFHIRGRRAVEQPPYLDLTPSYFHIRGREE	0
HIRa	NVE15069	ID	LSPAAYFHIR	GKR	MRLYLFVPVFALVLAVEGASDEKRDSKQPPIDLSPAAYFHIRGKRTHNAPPLDLSGPAYFHIRGKRTAKQPPYLDLGEPSFFHIRGKRTEGPPYIDLTEPSFFHIRGKRSSEQPPLDLGPAYFHIRGKRTKNPPIDLGPAYFHIRGKRLSGEQPPYLDLTPAYFHIRGKRTQQPPMIDLSEPAFFHIRGRRAVEQPPYLDLTPSYFHIRGREE	0
HIRa	NVE15069	LD	LTPAYFHIR	GKR	MRLYLFVPVFALVLAVEGASDEKRDSKQPPIDLSPAAYFHIRGKRTHNAPPLDLSGPAYFHIRGKRTAKQPPYLDLGEPSFFHIRGKRTEGPPYIDLTEPSFFHIRGKRSSEQPPLDLGPAYFHIRGKRTKNPPIDLGPAYFHIRGKRLSGEQPPYLDLTPAYFHIRGKRTQQPPMIDLSEPAFFHIRGRRAVEQPPYLDLTPSYFHIRGREE	0
HIRa	NVE15069	LD	LTPSYFHIR	GRE	MRLYLFVPVFALVLAVEGASDEKRDSKQPPIDLSPAAYFHIRGKRTHNAPPLDLSGPAYFHIRGKRTAKQPPYLDLGEPSFFHIRGKRTEGPPYIDLTEPSFFHIRGKRSSEQPPLDLGPAYFHIRGKRTKNPPIDLGPAYFHIRGKRLSGEQPPYLDLTPAYFHIRGKRTQQPPMIDLSEPAFFHIRGRRAVEQPPYLDLTPSYFHIRGREE	0
HIRa	NVE15069	TK	NPPIDLGPAYFHIR	GKR	MRLYLFVPVFALVLAVEGASDEKRDSKQPPIDLSPAAYFHIRGKRTHNAPPLDLSGPAYFHIRGKRTAKQPPYLDLGEPSFFHIRGKRTEGPPYIDLTEPSFFHIRGKRSSEQPPLDLGPAYFHIRGKRTKNPPIDLGPAYFHIRGKRLSGEQPPYLDLTPAYFHIRGKRTQQPPMIDLSEPAFFHIRGRRAVEQPPYLDLTPSYFHIRGREE	0
HIRa	NVE15069	SK	QPPIDLSPAAYFHIR	GKR	MRLYLFVPVFALVLAVEGASDEKRDSKQPPIDLSPAAYFHIRGKRTHNAPPLDLSGPAYFHIRGKRTAKQPPYLDLGEPSFFHIRGKRTEGPPYIDLTEPSFFHIRGKRSSEQPPLDLGPAYFHIRGKRTKNPPIDLGPAYFHIRGKRLSGEQPPYLDLTPAYFHIRGKRTQQPPMIDLSEPAFFHIRGRRAVEQPPYLDLTPSYFHIRGREE	0
HIRa	NVE15069	SE	QPPLDLGPAYFHIR	GKR	MRLYLFVPVFALVLAVEGASDEKRDSKQPPIDLSPAAYFHIRGKRTHNAPPLDLSGPAYFHIRGKRTAKQPPYLDLGEPSFFHIRGKRTEGPPYIDLTEPSFFHIRGKRSSEQPPLDLGPAYFHIRGKRTKNPPIDLGPAYFHIRGKRLSGEQPPYLDLTPAYFHIRGKRTQQPPMIDLSEPAFFHIRGRRAVEQPPYLDLTPSYFHIRGREE	0
HIRa	NVE15069	SE	QPPLDLGPAYFHIRG	KR	MRLYLFVPVFALVLAVEGASDEKRDSKQPPIDLSPAAYFHIRGKRTHNAPPLDLSGPAYFHIRGKRTAKQPPYLDLGEPSFFHIRGKRTEGPPYIDLTEPSFFHIRGKRSSEQPPLDLGPAYFHIRGKRTKNPPIDLGPAYFHIRGKRLSGEQPPYLDLTPAYFHIRGKRTQQPPMIDLSEPAFFHIRGRRAVEQPPYLDLTPSYFHIRGREE	0
HIRa	NVE15069	TQ	QPPMIDLSEPAFFHIR	GRR	MRLYLFVPVFALVLAVEGASDEKRDSKQPPIDLSPAAYFHIRGKRTHNAPPLDLSGPAYFHIRGKRTAKQPPYLDLGEPSFFHIRGKRTEGPPYIDLTEPSFFHIRGKRSSEQPPLDLGPAYFHIRGKRTKNPPIDLGPAYFHIRGKRLSGEQPPYLDLTPAYFHIRGKRTQQPPMIDLSEPAFFHIRGRRAVEQPPYLDLTPSYFHIRGREE	0
HIRa	NVE15069	AK	QPPYLDLGEPSFFHIR	GKR	MRLYLFVPVFALVLAVEGASDEKRDSKQPPIDLSPAAYFHIRGKRTHNAPPLDLSGPAYFHIRGKRTAKQPPYLDLGEPSFFHIRGKRTEGPPYIDLTEPSFFHIRGKRSSEQPPLDLGPAYFHIRGKRTKNPPIDLGPAYFHIRGKRLSGEQPPYLDLTPAYFHIRGKRTQQPPMIDLSEPAFFHIRGRRAVEQPPYLDLTPSYFHIRGREE	0
HIRa	NVE15069	GE	QPPYLDLTPAYFHIR	GKR	MRLYLFVPVFALVLAVEGASDEKRDSKQPPIDLSPAAYFHIRGKRTHNAPPLDLSGPAYFHIRGKRTAKQPPYLDLGEPSFFHIRGKRTEGPPYIDLTEPSFFHIRGKRSSEQPPLDLGPAYFHIRGKRTKNPPIDLGPAYFHIRGKRLSGEQPPYLDLTPAYFHIRGKRTQQPPMIDLSEPAFFHIRGRRAVEQPPYLDLTPSYFHIRGREE	0
HIRa	NVE15069	GE	QPPYLDLTPAYFHIRG	KR	MRLYLFVPVFALVLAVEGASDEKRDSKQPPIDLSPAAYFHIRGKRTHNAPPLDLSGPAYFHIRGKRTAKQPPYLDLGEPSFFHIRGKRTEGPPYIDLTEPSFFHIRGKRSSEQPPLDLGPAYFHIRGKRTKNPPIDLGPAYFHIRGKRLSGEQPPYLDLTPAYFHIRGKRTQQPPMIDLSEPAFFHIRGRRAVEQPPYLDLTPSYFHIRGREE	0
HIRa	NVE15069	VE	QPPYLDLTPSYFHIR	GRE	MRLYLFVPVFALVLAVEGASDEKRDSKQPPIDLSPAAYFHIRGKRTHNAPPLDLSGPAYFHIRGKRTAKQPPYLDLGEPSFFHIRGKRTEGPPYIDLTEPSFFHIRGKRSSEQPPLDLGPAYFHIRGKRTKNPPIDLGPAYFHIRGKRLSGEQPPYLDLTPAYFHIRGKRTQQPPMIDLSEPAFFHIRGRRAVEQPPYLDLTPSYFHIRGREE	0
HIRa	NVE15069	RT	QQPPMIDLSEPAFFHIR	GRR	MRLYLFVPVFALVLAVEGASDEKRDSKQPPIDLSPAAYFHIRGKRTHNAPPLDLSGPAYFHIRGKRTAKQPPYLDLGEPSFFHIRGKRTEGPPYIDLTEPSFFHIRGKRSSEQPPLDLGPAYFHIRGKRTKNPPIDLGPAYFHIRGKRLSGEQPPYLDLTPAYFHIRGKRTQQPPMIDLSEPAFFHIRGRRAVEQPPYLDLTPSYFHIRGREE	0
HIRa	NVE15069	DL	SEPAFFHIR	GRR	MRLYLFVPVFALVLAVEGASDEKRDSKQPPIDLSPAAYFHIRGKRTHNAPPLDLSGPAYFHIRGKRTAKQPPYLDLGEPSFFHIRGKRTEGPPYIDLTEPSFFHIRGKRSSEQPPLDLGPAYFHIRGKRTKNPPIDLGPAYFHIRGKRLSGEQPPYLDLTPAYFHIRGKRTQQPPMIDLSEPAFFHIRGRRAVEQPPYLDLTPSYFHIRGREE	0
HIRa	NVE15069	DL	TEPSFFHIR	GKR	MRLYLFVPVFALVLAVEGASDEKRDSKQPPIDLSPAAYFHIRGKRTHNAPPLDLSGPAYFHIRGKRTAKQPPYLDLGEPSFFHIRGKRTEGPPYIDLTEPSFFHIRGKRSSEQPPLDLGPAYFHIRGKRTKNPPIDLGPAYFHIRGKRLSGEQPPYLDLTPAYFHIRGKRTQQPPMIDLSEPAFFHIRGRRAVEQPPYLDLTPSYFHIRGREE	0
CCa	NVE15666	DE	DAPQSDLKKMF	RR	MTAKLCLPLCIYVFCILHCVSTSSLRVKADNNPSDDDALSRFFRRDCHVGLWCGKKREPAIEQSSRFKSADDCPVGLWCGKKRSASKGESIEISHSNKQREQGEEESTVLQKLTDGNTGPPDEVARRMFRRASTSCPPGLWCGKKRSIPEQNPSGLELQLPYLAGTLPSYEVNDEDAPQSDLKKMFRRASTSCPPGLWCGRKRTVYSNIGIPPRQSSLKSKFERSCPPGLWCGK	1
CCa	NVE15666	AP	QSDLKKMF	RR	MTAKLCLPLCIYVFCILHCVSTSSLRVKADNNPSDDDALSRFFRRDCHVGLWCGKKREPAIEQSSRFKSADDCPVGLWCGKKRSASKGESIEISHSNKQREQGEEESTVLQKLTDGNTGPPDEVARRMFRRASTSCPPGLWCGKKRSIPEQNPSGLELQLPYLAGTLPSYEVNDEDAPQSDLKKMFRRASTSCPPGLWCGRKRTVYSNIGIPPRQSSLKSKFERSCPPGLWCGK	1
QW peptide	NVE16920	DS	SPPQWKLDSSPPQW	KR	MVKFEIFMGLALLLFVSADCLENLLQIKRDSSPPQWKRESTPPQWKRDSSPPQWKRDSSPPQWKRDSSPPQWKLDSSPPQWKRDSSPPQWKRDSSPPQWKRDSSPPQWKRDSSPPQWKQDLSPPQWKRESTPPQWKLESTPPQWKRDSSPPQWKRGIFH	0
QW peptide	NVE16920	DS	SPPQWKQDLSPPQW	KR	MVKFEIFMGLALLLFVSADCLENLLQIKRDSSPPQWKRESTPPQWKRDSSPPQWKRDSSPPQWKRDSSPPQWKLDSSPPQWKRDSSPPQWKRDSSPPQWKRDSSPPQWKRDSSPPQWKQDLSPPQWKRESTPPQWKLESTPPQWKRDSSPPQWKRGIFH	0
QW peptide	NVE16920	ES	TPPQWKLESTPPQW	KR	MVKFEIFMGLALLLFVSADCLENLLQIKRDSSPPQWKRESTPPQWKRDSSPPQWKRDSSPPQWKRDSSPPQWKLDSSPPQWKRDSSPPQWKRDSSPPQWKRDSSPPQWKRDSSPPQWKQDLSPPQWKRESTPPQWKLESTPPQWKRDSSPPQWKRGIFH	0
FLRNa1	NVE17328|HADO01000428.1	MG	YPPRWEEYENQLYQ	RR	MASSRTLVAFLAVFVLCGMLIQTSDAFLRNGRDEIYAKKRAEMGYPPRWEEYENQLYQRRDEDAKRSKQ	1
	NVE18646	RP	QMYRYQEVTNT	Precursor end	MKSTTLSILLGLFVVAAMTLPDVNAWTGIIGASAPSGEEEGGNRLAHLFYKRLDSLKRLKAKARPQMYRYQEVTNT	0
	NVE21167	KR	GFDIPIQA	KK	MLSLVALVTLALISPELASGSPFSQMRRSLLEEQCLPGVWGCKRGAPAALNEQRRTASEESDEQCLPGVWGCKKRTVIQERQCLPGVWGCKRGFDIPIQAKKKQKTPEECPPGLWGCKRGFLGGYYPETSPDYYQQGMPSEYSEYQQGYPSDYQNLASYYKRRLAIRMRRSVEKEDEQCLPGVWGCKKDKIEAKKSEDQCLPGVWGCKRDKIAKKQAEEQCPPGLWGCKKDNIEIEKTEETKKSEDQCLPGVWGCKKRSVTSN	1
PFHa	NVE22506	RR	QMPNMVPFH	GKR	MADIPALIPVPVPYGGSLLKSGSLGLSSDDLHTALYTGLVGFKTRYFTTVAMETCTPLTSVVYHTSEKDGLEVTTTNYYGIVLEEREPEIFKLPEYCTDTRKRRQMPNMVPFHGKRQMPNMVPFHGKRQMPNMVPFHGKRQMPNMVPFHGKRQMPNQVPYLG	0
PFHa	NVE22506	RR	QMPNMVPFHG	KR	MADIPALIPVPVPYGGSLLKSGSLGLSSDDLHTALYTGLVGFKTRYFTTVAMETCTPLTSVVYHTSEKDGLEVTTTNYYGIVLEEREPEIFKLPEYCTDTRKRRQMPNMVPFHGKRQMPNMVPFHGKRQMPNMVPFHGKRQMPNMVPFHGKRQMPNQVPYLG	0
PRGa	NVE226	LD	APRGGRSLLDLLAAPRG	GRD	MAYFKWTLCAFVLAVLCLSTNYVAGEKNEEKSEKSTLLQELSKKDFDKELAADEAIVLELLKEKADDLDEESLLDLLAPRGGRDAPRGGRSLLDAPRGGRSLLDLLAAPRGGRDAPRGGRSLTELLNAPRRGRSLADLLDAPRGGRSLAELLDAPRGGRSYDGPRGGRSMENGPRGGRATEFGPRGGRSYEGSRGGREIDGPRGGRSFKEGPRGGRAVEGPRGGRDLYEEGPRGGREVYLEGPRGGRDLVLEGPRGGRDLYEEGPRGGREVNLEGPRGGRDLYEEGPRGGRSYDGPRGGRSAVYGPRGGRDANDGPRGGRDANDGPRGGRDANDGPRGGRDANEGPRGGRDANEGPRGGRDANKGPRGGRNTNTVGAQQADARQGQRGGRSTGMGPRGG…	1
LRWa3	NVE2302	SA	GPPQGLRW	GKR	MASKTLLVCLLVTFMVLSIYTQESSAGPPQGLRWGKRWENPSEKQVRENAEREVQDFKDYFKKKYN	0
LRWa3	NVE2302	EV	QDFKDYFKKKYN	Precursor end	MASKTLLVCLLVTFMVLSIYTQESSAGPPQGLRWGKRWENPSEKQVRENAEREVQDFKDYFKKKYN	0
LRWa2	NVE24305|HADP01189706.1	FQ	QWKDAHYPSREE	RR	MDAKKVLLIAVISCVLLSVCIEQTTAQGGLRWGREFENEFQQWKDAHYPSREERRSFQKKRSFKMA	1
LRWa1a	NVE24307|HADP01080760.1	EE	HPKLSPLMKEYL	RR	MESKRLLIVLVVCCALVSLYVEPSQAQGLRWGREFEEEHPKLSPLMKEYLRRQEAMQKKREFAAKKADY	0
LRWa1a	NVE24307|HADP01080760.1	HP	KLSPLMKEYL	RR	MESKRLLIVLVVCCALVSLYVEPSQAQGLRWGREFEEEHPKLSPLMKEYLRRQEAMQKKREFAAKKADY	0
LRWa3	NVE24308	SA	GPPQGLRW	GKR	MVLSIYTQESSAGPPQGLRWGKRWENPSEKQVRENAEREVQDFKDYFKKKYNRDLDI	1
	NVE26068	WD	QGNEGYGVDSENAMIEQKTKVIA	KK	MSVSVKCVFVLFAFVLFLNVVASQEDPVWDQGNEGYGVDSENAMIEQKTKVIAKKSPFREVCLMARCTRRRRRSSERKRVEKKVQFTEDLLDDNNDLFTSDVGSTQRDKSSTQEITTITDISD	0
WFSa	NVE2973	DN	APPGNGEGEAGFIPWFS	GKR	MSNYFLHWVTALAFILCSGLANGKIPKVPIKEVENAPPSTGEGEAGFIPWFSGKREFEPKNALKNDNAPPGNGEGEAGFIPWFSGKREFEPKKALKNDNAPPGNGEGEARFIPWFSGKRELIPKIVLQNDNAPPGNGEGEAGFIPWFSGKREFEQKNALQNDNAPPGNGEGEAGFIPWFSGKREFEPKNALQNDNAPPGNGEGEAGFIPWFSGKREQPKQRSKMTWYRQARERESKGLFLGSPGNEQSIDSKK	1
WFSa	NVE2973	EN	APPSTGEGEAGFIPWFS	GKR	MSNYFLHWVTALAFILCSGLANGKIPKVPIKEVENAPPSTGEGEAGFIPWFSGKREFEPKNALKNDNAPPGNGEGEAGFIPWFSGKREFEPKKALKNDNAPPGNGEGEARFIPWFSGKRELIPKIVLQNDNAPPGNGEGEAGFIPWFSGKREFEQKNALQNDNAPPGNGEGEAGFIPWFSGKREFEPKNALQNDNAPPGNGEGEAGFIPWFSGKREQPKQRSKMTWYRQARERESKGLFLGSPGNEQSIDSKK	1
WFSa	NVE2974	DN	APPGNEEGEAGFIPWFS	GKR	MSNYFLHWVTALAFILCSGLANGKIPKVPIKEVENAPPSTGEGEAGFIPWFSGKREFNPKNALKNDNAPPGNEEGEAGFIPWFSGKRELIPKIVLQNDNAPPGNGEGEAGFIPWFSGKREFEPKNALQNDNAPPGNGEGEAGFIPWFSGKRDTNQKMHYKMTMHRPAMAKGRLVSFLGFQARGTQPKQRYKMTWYRQARERESKGLFLGSPGNEQSIDSKK	0
WFSa	NVE2974	DN	APPGNGEGEAGFIPWFS	GKR	MSNYFLHWVTALAFILCSGLANGKIPKVPIKEVENAPPSTGEGEAGFIPWFSGKREFNPKNALKNDNAPPGNEEGEAGFIPWFSGKRELIPKIVLQNDNAPPGNGEGEAGFIPWFSGKREFEPKNALQNDNAPPGNGEGEAGFIPWFSGKRDTNQKMHYKMTMHRPAMAKGRLVSFLGFQARGTQPKQRYKMTWYRQARERESKGLFLGSPGNEQSIDSKK	0
WFSa	NVE2974	EN	APPSTGEGEAGFIPWFS	GKR	MSNYFLHWVTALAFILCSGLANGKIPKVPIKEVENAPPSTGEGEAGFIPWFSGKREFNPKNALKNDNAPPGNEEGEAGFIPWFSGKRELIPKIVLQNDNAPPGNGEGEAGFIPWFSGKREFEPKNALQNDNAPPGNGEGEAGFIPWFSGKRDTNQKMHYKMTMHRPAMAKGRLVSFLGFQARGTQPKQRYKMTWYRQARERESKGLFLGSPGNEQSIDSKK	0
	NVE339	DA	GPLRIMPIS	Precursor end	MRAVLVCAVLVLCLVAVKANKDEKEASEKVKKEANLRPLSPENHADALKDAIARKSPVLKNFKKEIKNFKLEKKKMWEKIQELKRKLADEKRAEKAMKSLSKDERKIKRKINKGMIKKLLEHKRKLVTRMKNARNAKREHLKRHKNSKRGKLHKKQAKVNQKRNKGHQKRGKDHHKREKSQHKREKHQKKNLNKRNKQNKRGHKTTIADAGPLRIMPIS	1
RPamide	NVE3755	RE	FPPGFHRP	GKK	MKVLCVTLVLMALVCSVQSRNLRHKDYERELQDYRRDFARALSMVEQDAFLPKPRPGRREFPPGFHRPGKKRSFKEEK	0
RPamide	NVE3755	EF	PPGFHRP	GKK	MKVLCVTLVLMALVCSVQSRNLRHKDYERELQDYRRDFARALSMVEQDAFLPKPRPGRREFPPGFHRPGKKRSFKEEK	0
RPamide	NVE3755	VE	QDAFLPKPRP	GRR	MKVLCVTLVLMALVCSVQSRNLRHKDYERELQDYRRDFARALSMVEQDAFLPKPRPGRREFPPGFHRPGKKRSFKEEK	0
RPamide	NVE3755	VE	QDAFLPKPRPG	RR	MKVLCVTLVLMALVCSVQSRNLRHKDYERELQDYRRDFARALSMVEQDAFLPKPRPGRREFPPGFHRPGKKRSFKEEK	0
QIamide	NVE3868	DI	QSLFKLED	KR	MQPLSVVIGVFVVLTITVLYTEGSPTGLDEREELYEAFMNARKAPLDIQSLFKLEDKRSAALPPRFGGQIGRRR	1
FRPamide	NVE4012|Nvec_XP_032233649.1	ED	IPSDDDQLMFRP	GRN	MYSCMGISLLLILCFKGSYGEESIDLEPGVDKVPEKVEHGEEGSAKYNINTVTLTGNKATGNKVTNDDKRPPWPPRPGKRTFRPQESADTPSIFRPGRSVHEDQLLFRPGRANLHKRQGLMFRPGRREDVPKPQIFRPGRREDIPSDDDQLMFRPGRNEEQLFRPGRRSDVGDEQLLFRPGRRSDLEEDQLIFRPGRRSDVAEEQLFRPGRRSDVPEAFLDQWTSVRPGRGGYRMPWTYTGNSVNSHVSQKSHTFRQKAVEQEKKKREV	0
FRPamide	NVE4012|Nvec_XP_032233649.1	RP	QESADTPSIFRP	GRS	MYSCMGISLLLILCFKGSYGEESIDLEPGVDKVPEKVEHGEEGSAKYNINTVTLTGNKATGNKVTNDDKRPPWPPRPGKRTFRPQESADTPSIFRPGRSVHEDQLLFRPGRANLHKRQGLMFRPGRREDVPKPQIFRPGRREDIPSDDDQLMFRPGRNEEQLFRPGRRSDVGDEQLLFRPGRRSDLEEDQLIFRPGRRSDVAEEQLFRPGRRSDVPEAFLDQWTSVRPGRGGYRMPWTYTGNSVNSHVSQKSHTFRQKAVEQEKKKREV	0
FRPamide	NVE4012|Nvec_XP_032233649.1	KR	QGLMFRP	GRR	MYSCMGISLLLILCFKGSYGEESIDLEPGVDKVPEKVEHGEEGSAKYNINTVTLTGNKATGNKVTNDDKRPPWPPRPGKRTFRPQESADTPSIFRPGRSVHEDQLLFRPGRANLHKRQGLMFRPGRREDVPKPQIFRPGRREDIPSDDDQLMFRPGRNEEQLFRPGRRSDVGDEQLLFRPGRRSDLEEDQLIFRPGRRSDVAEEQLFRPGRRSDVPEAFLDQWTSVRPGRGGYRMPWTYTGNSVNSHVSQKSHTFRQKAVEQEKKKREV	0
FRPamide	NVE4012|Nvec_XP_032233649.1	DD	QLMFRPGRNEEQLFRP	GRR	MYSCMGISLLLILCFKGSYGEESIDLEPGVDKVPEKVEHGEEGSAKYNINTVTLTGNKATGNKVTNDDKRPPWPPRPGKRTFRPQESADTPSIFRPGRSVHEDQLLFRPGRANLHKRQGLMFRPGRREDVPKPQIFRPGRREDIPSDDDQLMFRPGRNEEQLFRPGRRSDVGDEQLLFRPGRRSDLEEDQLIFRPGRRSDVAEEQLFRPGRRSDVPEAFLDQWTSVRPGRGGYRMPWTYTGNSVNSHVSQKSHTFRQKAVEQEKKKREV	0
FRPamide	NVE4012|Nvec_XP_032233649.1	LD	QWTSVRP	GRG	MYSCMGISLLLILCFKGSYGEESIDLEPGVDKVPEKVEHGEEGSAKYNINTVTLTGNKATGNKVTNDDKRPPWPPRPGKRTFRPQESADTPSIFRPGRSVHEDQLLFRPGRANLHKRQGLMFRPGRREDVPKPQIFRPGRREDIPSDDDQLMFRPGRNEEQLFRPGRRSDVGDEQLLFRPGRRSDLEEDQLIFRPGRRSDVAEEQLFRPGRRSDVPEAFLDQWTSVRPGRGGYRMPWTYTGNSVNSHVSQKSHTFRQKAVEQEKKKREV	0
FRPamide	NVE4012|Nvec_XP_032233649.1	TF	RPQESADTPSIFRP	GRS	MYSCMGISLLLILCFKGSYGEESIDLEPGVDKVPEKVEHGEEGSAKYNINTVTLTGNKATGNKVTNDDKRPPWPPRPGKRTFRPQESADTPSIFRPGRSVHEDQLLFRPGRANLHKRQGLMFRPGRREDVPKPQIFRPGRREDIPSDDDQLMFRPGRNEEQLFRPGRRSDVGDEQLLFRPGRRSDLEEDQLIFRPGRRSDVAEEQLFRPGRRSDVPEAFLDQWTSVRPGRGGYRMPWTYTGNSVNSHVSQKSHTFRQKAVEQEKKKREV	0
QWamide	NVE4601	KK	EIPPQGFRFNQW	GKK	MDESKEIPPQGLRFSQWGKKEIPPQGFRFNQWGKKEIPPQGFRFNQWGKKEIPPQGLRFNQWGKKEIPPQGLRFNQWGKKEIPPQGLRFSQWGKREIPPQGLRFNQWGKKEIPPQGLRFNQWGKKEIPPQGLRFNQWGKKEIPPQGLRFNQWGKKEIPPQGLRFNQWGKKEIPPQGLRFNQWGKKEIPPQGLRFSQWGKKEIPPQGLRFNQWGKKEIPPQGLRFNQWGKRKLINQVMI	1
QWamide	NVE4601	KK	EIPPQGLRFNQW	GKK	MDESKEIPPQGLRFSQWGKKEIPPQGFRFNQWGKKEIPPQGFRFNQWGKKEIPPQGLRFNQWGKKEIPPQGLRFNQWGKKEIPPQGLRFSQWGKREIPPQGLRFNQWGKKEIPPQGLRFNQWGKKEIPPQGLRFNQWGKKEIPPQGLRFNQWGKKEIPPQGLRFNQWGKKEIPPQGLRFNQWGKKEIPPQGLRFSQWGKKEIPPQGLRFNQWGKKEIPPQGLRFNQWGKRKLINQVMI	1
QWamide	NVE4601	SK	EIPPQGLRFSQW	GKK	MDESKEIPPQGLRFSQWGKKEIPPQGFRFNQWGKKEIPPQGFRFNQWGKKEIPPQGLRFNQWGKKEIPPQGLRFNQWGKKEIPPQGLRFSQWGKREIPPQGLRFNQWGKKEIPPQGLRFNQWGKKEIPPQGLRFNQWGKKEIPPQGLRFNQWGKKEIPPQGLRFNQWGKKEIPPQGLRFNQWGKKEIPPQGLRFSQWGKKEIPPQGLRFNQWGKKEIPPQGLRFNQWGKRKLINQVMI	1
QWamide	NVE4601	KE	IPPQGFRFNQW	GKK	MDESKEIPPQGLRFSQWGKKEIPPQGFRFNQWGKKEIPPQGFRFNQWGKKEIPPQGLRFNQWGKKEIPPQGLRFNQWGKKEIPPQGLRFSQWGKREIPPQGLRFNQWGKKEIPPQGLRFNQWGKKEIPPQGLRFNQWGKKEIPPQGLRFNQWGKKEIPPQGLRFNQWGKKEIPPQGLRFNQWGKKEIPPQGLRFSQWGKKEIPPQGLRFNQWGKKEIPPQGLRFNQWGKRKLINQVMI	1
QWamide	NVE4601	KE	IPPQGLRFNQW	GKK	MDESKEIPPQGLRFSQWGKKEIPPQGFRFNQWGKKEIPPQGFRFNQWGKKEIPPQGLRFNQWGKKEIPPQGLRFNQWGKKEIPPQGLRFSQWGKREIPPQGLRFNQWGKKEIPPQGLRFNQWGKKEIPPQGLRFNQWGKKEIPPQGLRFNQWGKKEIPPQGLRFNQWGKKEIPPQGLRFNQWGKKEIPPQGLRFSQWGKKEIPPQGLRFNQWGKKEIPPQGLRFNQWGKRKLINQVMI	1
QWamide	NVE4601	KE	IPPQGLRFNQWG	KK	MDESKEIPPQGLRFSQWGKKEIPPQGFRFNQWGKKEIPPQGFRFNQWGKKEIPPQGLRFNQWGKKEIPPQGLRFNQWGKKEIPPQGLRFSQWGKREIPPQGLRFNQWGKKEIPPQGLRFNQWGKKEIPPQGLRFNQWGKKEIPPQGLRFNQWGKKEIPPQGLRFNQWGKKEIPPQGLRFNQWGKKEIPPQGLRFSQWGKKEIPPQGLRFNQWGKKEIPPQGLRFNQWGKRKLINQVMI	1
QWamide	NVE4601	KE	IPPQGLRFSQW	GKK	MDESKEIPPQGLRFSQWGKKEIPPQGFRFNQWGKKEIPPQGFRFNQWGKKEIPPQGLRFNQWGKKEIPPQGLRFNQWGKKEIPPQGLRFSQWGKREIPPQGLRFNQWGKKEIPPQGLRFNQWGKKEIPPQGLRFNQWGKKEIPPQGLRFNQWGKKEIPPQGLRFNQWGKKEIPPQGLRFNQWGKKEIPPQGLRFSQWGKKEIPPQGLRFNQWGKKEIPPQGLRFNQWGKRKLINQVMI	1
LRE peptide	NVE4782	QC	QLPSVSEVSENDVASLLRE	RR	MKSLIQVLLLALVVIELAQCQLPSVSEVSENDVASLLRERRSLGYYIVSDWDECDCSTGWQSRQVSCAQPPCHFSRAPRPRRPCVC	0
	NVE4853	SQ	QAVNNPFL	Precursor end	MSIRRQLKNVVNNYSNSEVKVREATSNDPWGPSSSLMSEIADATYNVVAFSEIMAMIWRRLNDHGKNWRHVYKSLVLLDYIIKTGSERVAQQCRENIFVIQTLKDFQFIDKDGKDQGMNVREKAKQLVALLKDEERLKSERQRALKAKERFAQASSGIGSDSVRSGQTTLGSGGSLTDMRTAGADGGALPTSRSWEPERKVTNTEIEHCRPSNANEEELQLQLALALSKQEAEEHKELDKREDERLRLALNQSQTDSSVPGYQTEQDGFGVDAWGAPISQAPSQQPVSDPWAGGAQAAVPPDPWGGSMPPVPAADPWGGIGVSTAAPISSAPIVSSTPPVADPWGAPQAAAPVAADPWGAPAPVSSAGSNPWSSTNGQSIIAPAVSISDPFDPFGQPAP…	1
GWA peptide	NVE6636	AM	QWGHKGWA	KR	MSRLVILLVFCLVLVSLALGQLITEGGEGINAGGACKRANGMACSDTTQGWEKVDMKRQVRISETTDPWVWEPKRQRLAKVGREQKEDEDNNLGGGGWFRRQAMQWGHKGWAKRQAQLNEGWKSVNDDKGWAKPHAQLNEGWKSVNEGTKAGQNDKRN	0
GWA peptide	NVE6636	RR	QAMQWGHKGWA	KR	MSRLVILLVFCLVLVSLALGQLITEGGEGINAGGACKRANGMACSDTTQGWEKVDMKRQVRISETTDPWVWEPKRQRLAKVGREQKEDEDNNLGGGGWFRRQAMQWGHKGWAKRQAQLNEGWKSVNDDKGWAKPHAQLNEGWKSVNEGTKAGQNDKRN	0
	NVE7357	VE	DVPKVPLPFL	Precursor end	MKFAVALVLVAVASAMPSKRSGDVCVSPEQFVGRYTTYIHKDSGEESAVPGNMYYDWRHKRIRVDVQVEGVTYKSYLIYNEKVGYTVFGERCYKYALTTPFTPVELPADATLLESGRAGSSEHGLNVKRFHGKVLGVPFLATVTADECILVSSVGRKDDTTVIFSLLDVSRLEVTDDDFKRPTECVEVGNEKRSVEDVPKVPLPFL	1
EFV peptide	NVE8232	LS	QETDGESLKKAEEEFV	RR	MKPYQKVLAGLLVVALAVQVVLSQETDGESLKKAEEEFVRRCAVYGCGLFDDFEDKRGLFTKLRLGGSKGGNRHYFKNRKYFRNNVVKRDANLNKLSVKDLDNE	0
	NVE8927	RK	GPLVHGLVKEAETGAKVEHW	KR	MAVSLMLLGFLLLGSDSVLGSSREELDPRPRKGPLVHGLVKEAETGAKVEHWKRDTGSSGIPAWMKDTGKAYNGYPSQVTCALKPMSEAYHELKARRYQNCDQYFRCQGSKKAAKCGLFSKLLASAISYDYRWRTAGLETYTSAADEYGRKGGDCLNKYYYDTLTTEKVCWLPWQLQE	1
	NVE8927	PR	KGPLVHGLVKEAETGAKVEHW	KR	MAVSLMLLGFLLLGSDSVLGSSREELDPRPRKGPLVHGLVKEAETGAKVEHWKRDTGSSGIPAWMKDTGKAYNGYPSQVTCALKPMSEAYHELKARRYQNCDQYFRCQGSKKAAKCGLFSKLLASAISYDYRWRTAGLETYTSAADEYGRKGGDCLNKYYYDTLTTEKVCWLPWQLQE	1
	NVE9233	RP	QMYRYQEVTNT	Precursor end	MKLKPNTQAINTVSSEARPQAAGSSILNSTVTERRGFNMKSTTLSILLGLFVLAAMTLPDVNAWTGIIGASAPSGEEEGGNRLAHLFYKRLDSLKRLKAKARPQMYRYQEVTNT	0
GLWamide	NVE9858	SP	QRDLYGIGLW	GRN	MLVPGLSNFLLPMECYCTNFFXXXXXXXXXXXXXXXXXCLALCHAETKRKAADTTDTENELDASPNVNNDDDNDIKRMPTDTKRQAGAPGLCRKRSPKPPGLWGKRQAGAPGLWGKRSAGPPGLWGKRDAGPPGLWGKRVAGPPGLWGKRQAGAPGLWGREAGAPGLWGKRRAGAPGLWGKREANAPGLWGKRQAGPPGLWGKREANAPGLWGKRQAGPPGLWGKRDEDEDEDMDETNGDPLWGRSADAGPPGLWGRKKRAASPQRDLYGIGLWGRNAALMTAEELDLSFKNEEQS	1
GLWamide	NVE9858	KR	QAGAPGLW	GKR	MLVPGLSNFLLPMECYCTNFFXXXXXXXXXXXXXXXXXCLALCHAETKRKAADTTDTENELDASPNVNNDDDNDIKRMPTDTKRQAGAPGLCRKRSPKPPGLWGKRQAGAPGLWGKRSAGPPGLWGKRDAGPPGLWGKRVAGPPGLWGKRQAGAPGLWGREAGAPGLWGKRRAGAPGLWGKREANAPGLWGKRQAGPPGLWGKREANAPGLWGKRQAGPPGLWGKRDEDEDEDMDETNGDPLWGRSADAGPPGLWGRKKRAASPQRDLYGIGLWGRNAALMTAEELDLSFKNEEQS	1
GLWamide	NVE9858	KR	QAGPPGLW	GKR	MLVPGLSNFLLPMECYCTNFFXXXXXXXXXXXXXXXXXCLALCHAETKRKAADTTDTENELDASPNVNNDDDNDIKRMPTDTKRQAGAPGLCRKRSPKPPGLWGKRQAGAPGLWGKRSAGPPGLWGKRDAGPPGLWGKRVAGPPGLWGKRQAGAPGLWGREAGAPGLWGKRRAGAPGLWGKREANAPGLWGKRQAGPPGLWGKREANAPGLWGKRQAGPPGLWGKRDEDEDEDMDETNGDPLWGRSADAGPPGLWGRKKRAASPQRDLYGIGLWGRNAALMTAEELDLSFKNEEQS	1
GLWamide	Nvec_GLWamide	SP	QRDLYGIGLW	GRN	MALFGHTLVAVLFCLALCHAETKRKAADTTDTENELDASPNVNNDDDNDIKRMPTDTKRQAGAPGLWGKRDAGPPGLWGKRDAGPPGLWGKRSPKPPGLWGKRQAGAPGLWGKRSAGPPGLWGKRDAGPPGLWGKRVAGPPGLWGKRQAGAPGLWGREAGAPGLWGKRQAGAPGLWGKREAGAPGLWGREANAPGLWGKRRAGAPGLWGKREANAPGLWGKRQAGPPGLWGKREANAPGLWGKRQAGPPGLWGKREANAPGLWGKRQAGPPGLWGKRDEDEDEDMDETNGDPLWGRSADAGPPGLWGRKKRAASPQRDLYGIGLWGRNAALMTAEELDLSFKNEEQS	0
GLWamide	Nvec_GLWamide	KR	QAGAPGLW	GKR	MALFGHTLVAVLFCLALCHAETKRKAADTTDTENELDASPNVNNDDDNDIKRMPTDTKRQAGAPGLWGKRDAGPPGLWGKRDAGPPGLWGKRSPKPPGLWGKRQAGAPGLWGKRSAGPPGLWGKRDAGPPGLWGKRVAGPPGLWGKRQAGAPGLWGREAGAPGLWGKRQAGAPGLWGKREAGAPGLWGREANAPGLWGKRRAGAPGLWGKREANAPGLWGKRQAGPPGLWGKREANAPGLWGKRQAGPPGLWGKREANAPGLWGKRQAGPPGLWGKRDEDEDEDMDETNGDPLWGRSADAGPPGLWGRKKRAASPQRDLYGIGLWGRNAALMTAEELDLSFKNEEQS	0
GLWamide	Nvec_GLWamide	KR	QAGPPGLW	GKR	MALFGHTLVAVLFCLALCHAETKRKAADTTDTENELDASPNVNNDDDNDIKRMPTDTKRQAGAPGLWGKRDAGPPGLWGKRDAGPPGLWGKRSPKPPGLWGKRQAGAPGLWGKRSAGPPGLWGKRDAGPPGLWGKRVAGPPGLWGKRQAGAPGLWGREAGAPGLWGKRQAGAPGLWGKREAGAPGLWGREANAPGLWGKRRAGAPGLWGKREANAPGLWGKRQAGPPGLWGKREANAPGLWGKRQAGPPGLWGKREANAPGLWGKRQAGPPGLWGKRDEDEDEDMDETNGDPLWGRSADAGPPGLWGRKKRAASPQRDLYGIGLWGRNAALMTAEELDLSFKNEEQS	0
GLWamide	NVEC200_000296_1.1	SP	QRDLYGIGLW	GRN	TIISLQSQAKYYCLVLAVCNFNAVSISATHRFAKSPCDIFNSEYLVKLPARLSTETHEGQRAKEGSTLQHRAMALFGHTLVAVLFCLALCHAETKRKAADTTDTENELDASPNVNNDDDNDIKRMPTDTKRQAGAPGLWGKRDAGPPGLWGKRDAGPPGLCRKRSPKPPGLWGKRQAGAPGLWGKRSAGPPGLWGKRDAGPPGLWGKRVAGPPGLWGKRQAGAPGLWGREAGAPGLWGKRQAGAPGLWGKREAGAPGLWGREANAPGLWGKRRAGAPGLWGKREANAPGLWGKRQAGPPGLWGKREANAPGLWGKRQAGPPGLWGKREANAPGLWGKRQAGPPGLWGKRDEDEDEDMDETNGDPLWGRSADAGPPGLWGRKKRAASPQRDLYGIGLWGR…	0
GLWamide	NVEC200_000296_1.1	KR	QAGAPGLW	GKR	TIISLQSQAKYYCLVLAVCNFNAVSISATHRFAKSPCDIFNSEYLVKLPARLSTETHEGQRAKEGSTLQHRAMALFGHTLVAVLFCLALCHAETKRKAADTTDTENELDASPNVNNDDDNDIKRMPTDTKRQAGAPGLWGKRDAGPPGLWGKRDAGPPGLCRKRSPKPPGLWGKRQAGAPGLWGKRSAGPPGLWGKRDAGPPGLWGKRVAGPPGLWGKRQAGAPGLWGREAGAPGLWGKRQAGAPGLWGKREAGAPGLWGREANAPGLWGKRRAGAPGLWGKREANAPGLWGKRQAGPPGLWGKREANAPGLWGKRQAGPPGLWGKREANAPGLWGKRQAGPPGLWGKRDEDEDEDMDETNGDPLWGRSADAGPPGLWGRKKRAASPQRDLYGIGLWGR…	0
GLWamide	NVEC200_000296_1.1	KR	QAGPPGLW	GKR	TIISLQSQAKYYCLVLAVCNFNAVSISATHRFAKSPCDIFNSEYLVKLPARLSTETHEGQRAKEGSTLQHRAMALFGHTLVAVLFCLALCHAETKRKAADTTDTENELDASPNVNNDDDNDIKRMPTDTKRQAGAPGLWGKRDAGPPGLWGKRDAGPPGLCRKRSPKPPGLWGKRQAGAPGLWGKRSAGPPGLWGKRDAGPPGLWGKRVAGPPGLWGKRQAGAPGLWGREAGAPGLWGKRQAGAPGLWGKREAGAPGLWGREANAPGLWGKRRAGAPGLWGKREANAPGLWGKRQAGPPGLWGKREANAPGLWGKRQAGPPGLWGKREANAPGLWGKRQAGPPGLWGKRDEDEDEDMDETNGDPLWGRSADAGPPGLWGRKKRAASPQRDLYGIGLWGR…	0
HIRamide	Nvec_HIRamide	YN	APPLDLSGPAYFHIR	GKR	MRLYLFVPVFALVLAVEGASDEKRDSKQPPIDLSPAAYFHIRGKRTYNAPPLDLSGPAYFHIRGKRTAKQPPYLDLGEPSFFHIRGKRTEGPPYIDLTEPSFFHIRGKRSSEQPPLDLGPAYFHIRGKRTKNPPIDLGPAYFHIRGKRLSGEQPPYLDLTPAYFHIRGKRTQQPPMIDLSEPAFFHIRGRRAVEQPPYLDLTPSYFHIRGKRTEYPPFLELGQPSYFHIRGRRAEKTTKD	1
HIRamide	Nvec_HIRamide	LS	EPAFFHIR	GRR	MRLYLFVPVFALVLAVEGASDEKRDSKQPPIDLSPAAYFHIRGKRTYNAPPLDLSGPAYFHIRGKRTAKQPPYLDLGEPSFFHIRGKRTEGPPYIDLTEPSFFHIRGKRSSEQPPLDLGPAYFHIRGKRTKNPPIDLGPAYFHIRGKRLSGEQPPYLDLTPAYFHIRGKRTQQPPMIDLSEPAFFHIRGRRAVEQPPYLDLTPSYFHIRGKRTEYPPFLELGQPSYFHIRGRRAEKTTKD	1
HIRamide	Nvec_HIRamide	LG	EPSFFHIR	GKR	MRLYLFVPVFALVLAVEGASDEKRDSKQPPIDLSPAAYFHIRGKRTYNAPPLDLSGPAYFHIRGKRTAKQPPYLDLGEPSFFHIRGKRTEGPPYIDLTEPSFFHIRGKRSSEQPPLDLGPAYFHIRGKRTKNPPIDLGPAYFHIRGKRLSGEQPPYLDLTPAYFHIRGKRTQQPPMIDLSEPAFFHIRGRRAVEQPPYLDLTPSYFHIRGKRTEYPPFLELGQPSYFHIRGRRAEKTTKD	1
HIRamide	Nvec_HIRamide	DL	GEPSFFHIR	GKR	MRLYLFVPVFALVLAVEGASDEKRDSKQPPIDLSPAAYFHIRGKRTYNAPPLDLSGPAYFHIRGKRTAKQPPYLDLGEPSFFHIRGKRTEGPPYIDLTEPSFFHIRGKRSSEQPPLDLGPAYFHIRGKRTKNPPIDLGPAYFHIRGKRLSGEQPPYLDLTPAYFHIRGKRTQQPPMIDLSEPAFFHIRGRRAVEQPPYLDLTPSYFHIRGKRTEYPPFLELGQPSYFHIRGRRAEKTTKD	1
HIRamide	Nvec_HIRamide	TE	GPPYIDLTEPSFFHIR	GKR	MRLYLFVPVFALVLAVEGASDEKRDSKQPPIDLSPAAYFHIRGKRTYNAPPLDLSGPAYFHIRGKRTAKQPPYLDLGEPSFFHIRGKRTEGPPYIDLTEPSFFHIRGKRSSEQPPLDLGPAYFHIRGKRTKNPPIDLGPAYFHIRGKRLSGEQPPYLDLTPAYFHIRGKRTQQPPMIDLSEPAFFHIRGRRAVEQPPYLDLTPSYFHIRGKRTEYPPFLELGQPSYFHIRGRRAEKTTKD	1
HIRamide	Nvec_HIRamide	LD	LGPAYFHIR	GKR	MRLYLFVPVFALVLAVEGASDEKRDSKQPPIDLSPAAYFHIRGKRTYNAPPLDLSGPAYFHIRGKRTAKQPPYLDLGEPSFFHIRGKRTEGPPYIDLTEPSFFHIRGKRSSEQPPLDLGPAYFHIRGKRTKNPPIDLGPAYFHIRGKRLSGEQPPYLDLTPAYFHIRGKRTQQPPMIDLSEPAFFHIRGRRAVEQPPYLDLTPSYFHIRGKRTEYPPFLELGQPSYFHIRGRRAEKTTKD	1
HIRamide	Nvec_HIRamide	ID	LSPAAYFHIR	GKR	MRLYLFVPVFALVLAVEGASDEKRDSKQPPIDLSPAAYFHIRGKRTYNAPPLDLSGPAYFHIRGKRTAKQPPYLDLGEPSFFHIRGKRTEGPPYIDLTEPSFFHIRGKRSSEQPPLDLGPAYFHIRGKRTKNPPIDLGPAYFHIRGKRLSGEQPPYLDLTPAYFHIRGKRTQQPPMIDLSEPAFFHIRGRRAVEQPPYLDLTPSYFHIRGKRTEYPPFLELGQPSYFHIRGRRAEKTTKD	1
HIRamide	Nvec_HIRamide	LD	LTPAYFHIR	GKR	MRLYLFVPVFALVLAVEGASDEKRDSKQPPIDLSPAAYFHIRGKRTYNAPPLDLSGPAYFHIRGKRTAKQPPYLDLGEPSFFHIRGKRTEGPPYIDLTEPSFFHIRGKRSSEQPPLDLGPAYFHIRGKRTKNPPIDLGPAYFHIRGKRLSGEQPPYLDLTPAYFHIRGKRTQQPPMIDLSEPAFFHIRGRRAVEQPPYLDLTPSYFHIRGKRTEYPPFLELGQPSYFHIRGRRAEKTTKD	1
HIRamide	Nvec_HIRamide	LD	LTPSYFHIR	GKR	MRLYLFVPVFALVLAVEGASDEKRDSKQPPIDLSPAAYFHIRGKRTYNAPPLDLSGPAYFHIRGKRTAKQPPYLDLGEPSFFHIRGKRTEGPPYIDLTEPSFFHIRGKRSSEQPPLDLGPAYFHIRGKRTKNPPIDLGPAYFHIRGKRLSGEQPPYLDLTPAYFHIRGKRTQQPPMIDLSEPAFFHIRGRRAVEQPPYLDLTPSYFHIRGKRTEYPPFLELGQPSYFHIRGRRAEKTTKD	1
HIRamide	Nvec_HIRamide	TK	NPPIDLGPAYFHIR	GKR	MRLYLFVPVFALVLAVEGASDEKRDSKQPPIDLSPAAYFHIRGKRTYNAPPLDLSGPAYFHIRGKRTAKQPPYLDLGEPSFFHIRGKRTEGPPYIDLTEPSFFHIRGKRSSEQPPLDLGPAYFHIRGKRTKNPPIDLGPAYFHIRGKRLSGEQPPYLDLTPAYFHIRGKRTQQPPMIDLSEPAFFHIRGRRAVEQPPYLDLTPSYFHIRGKRTEYPPFLELGQPSYFHIRGRRAEKTTKD	1
HIRamide	Nvec_HIRamide	SK	QPPIDLSPAAYFHIR	GKR	MRLYLFVPVFALVLAVEGASDEKRDSKQPPIDLSPAAYFHIRGKRTYNAPPLDLSGPAYFHIRGKRTAKQPPYLDLGEPSFFHIRGKRTEGPPYIDLTEPSFFHIRGKRSSEQPPLDLGPAYFHIRGKRTKNPPIDLGPAYFHIRGKRLSGEQPPYLDLTPAYFHIRGKRTQQPPMIDLSEPAFFHIRGRRAVEQPPYLDLTPSYFHIRGKRTEYPPFLELGQPSYFHIRGRRAEKTTKD	1
HIRamide	Nvec_HIRamide	SE	QPPLDLGPAYFHIR	GKR	MRLYLFVPVFALVLAVEGASDEKRDSKQPPIDLSPAAYFHIRGKRTYNAPPLDLSGPAYFHIRGKRTAKQPPYLDLGEPSFFHIRGKRTEGPPYIDLTEPSFFHIRGKRSSEQPPLDLGPAYFHIRGKRTKNPPIDLGPAYFHIRGKRLSGEQPPYLDLTPAYFHIRGKRTQQPPMIDLSEPAFFHIRGRRAVEQPPYLDLTPSYFHIRGKRTEYPPFLELGQPSYFHIRGRRAEKTTKD	1
HIRamide	Nvec_HIRamide	SE	QPPLDLGPAYFHIRG	KR	MRLYLFVPVFALVLAVEGASDEKRDSKQPPIDLSPAAYFHIRGKRTYNAPPLDLSGPAYFHIRGKRTAKQPPYLDLGEPSFFHIRGKRTEGPPYIDLTEPSFFHIRGKRSSEQPPLDLGPAYFHIRGKRTKNPPIDLGPAYFHIRGKRLSGEQPPYLDLTPAYFHIRGKRTQQPPMIDLSEPAFFHIRGRRAVEQPPYLDLTPSYFHIRGKRTEYPPFLELGQPSYFHIRGRRAEKTTKD	1
HIRamide	Nvec_HIRamide	TQ	QPPMIDLSEPAFFHIR	GRR	MRLYLFVPVFALVLAVEGASDEKRDSKQPPIDLSPAAYFHIRGKRTYNAPPLDLSGPAYFHIRGKRTAKQPPYLDLGEPSFFHIRGKRTEGPPYIDLTEPSFFHIRGKRSSEQPPLDLGPAYFHIRGKRTKNPPIDLGPAYFHIRGKRLSGEQPPYLDLTPAYFHIRGKRTQQPPMIDLSEPAFFHIRGRRAVEQPPYLDLTPSYFHIRGKRTEYPPFLELGQPSYFHIRGRRAEKTTKD	1
HIRamide	Nvec_HIRamide	AK	QPPYLDLGEPSFFHIR	GKR	MRLYLFVPVFALVLAVEGASDEKRDSKQPPIDLSPAAYFHIRGKRTYNAPPLDLSGPAYFHIRGKRTAKQPPYLDLGEPSFFHIRGKRTEGPPYIDLTEPSFFHIRGKRSSEQPPLDLGPAYFHIRGKRTKNPPIDLGPAYFHIRGKRLSGEQPPYLDLTPAYFHIRGKRTQQPPMIDLSEPAFFHIRGRRAVEQPPYLDLTPSYFHIRGKRTEYPPFLELGQPSYFHIRGRRAEKTTKD	1
HIRamide	Nvec_HIRamide	GE	QPPYLDLTPAYFHIR	GKR	MRLYLFVPVFALVLAVEGASDEKRDSKQPPIDLSPAAYFHIRGKRTYNAPPLDLSGPAYFHIRGKRTAKQPPYLDLGEPSFFHIRGKRTEGPPYIDLTEPSFFHIRGKRSSEQPPLDLGPAYFHIRGKRTKNPPIDLGPAYFHIRGKRLSGEQPPYLDLTPAYFHIRGKRTQQPPMIDLSEPAFFHIRGRRAVEQPPYLDLTPSYFHIRGKRTEYPPFLELGQPSYFHIRGRRAEKTTKD	1
HIRamide	Nvec_HIRamide	GE	QPPYLDLTPAYFHIRG	KR	MRLYLFVPVFALVLAVEGASDEKRDSKQPPIDLSPAAYFHIRGKRTYNAPPLDLSGPAYFHIRGKRTAKQPPYLDLGEPSFFHIRGKRTEGPPYIDLTEPSFFHIRGKRSSEQPPLDLGPAYFHIRGKRTKNPPIDLGPAYFHIRGKRLSGEQPPYLDLTPAYFHIRGKRTQQPPMIDLSEPAFFHIRGRRAVEQPPYLDLTPSYFHIRGKRTEYPPFLELGQPSYFHIRGRRAEKTTKD	1
HIRamide	Nvec_HIRamide	VE	QPPYLDLTPSYFHIR	GKR	MRLYLFVPVFALVLAVEGASDEKRDSKQPPIDLSPAAYFHIRGKRTYNAPPLDLSGPAYFHIRGKRTAKQPPYLDLGEPSFFHIRGKRTEGPPYIDLTEPSFFHIRGKRSSEQPPLDLGPAYFHIRGKRTKNPPIDLGPAYFHIRGKRLSGEQPPYLDLTPAYFHIRGKRTQQPPMIDLSEPAFFHIRGRRAVEQPPYLDLTPSYFHIRGKRTEYPPFLELGQPSYFHIRGRRAEKTTKD	1
HIRamide	Nvec_HIRamide	LG	QPSYFHIR	GRR	MRLYLFVPVFALVLAVEGASDEKRDSKQPPIDLSPAAYFHIRGKRTYNAPPLDLSGPAYFHIRGKRTAKQPPYLDLGEPSFFHIRGKRTEGPPYIDLTEPSFFHIRGKRSSEQPPLDLGPAYFHIRGKRTKNPPIDLGPAYFHIRGKRLSGEQPPYLDLTPAYFHIRGKRTQQPPMIDLSEPAFFHIRGRRAVEQPPYLDLTPSYFHIRGKRTEYPPFLELGQPSYFHIRGRRAEKTTKD	1
HIRamide	Nvec_HIRamide	RT	QQPPMIDLSEPAFFHIR	GRR	MRLYLFVPVFALVLAVEGASDEKRDSKQPPIDLSPAAYFHIRGKRTYNAPPLDLSGPAYFHIRGKRTAKQPPYLDLGEPSFFHIRGKRTEGPPYIDLTEPSFFHIRGKRSSEQPPLDLGPAYFHIRGKRTKNPPIDLGPAYFHIRGKRLSGEQPPYLDLTPAYFHIRGKRTQQPPMIDLSEPAFFHIRGRRAVEQPPYLDLTPSYFHIRGKRTEYPPFLELGQPSYFHIRGRRAEKTTKD	1
HIRamide	Nvec_HIRamide	DL	SEPAFFHIR	GRR	MRLYLFVPVFALVLAVEGASDEKRDSKQPPIDLSPAAYFHIRGKRTYNAPPLDLSGPAYFHIRGKRTAKQPPYLDLGEPSFFHIRGKRTEGPPYIDLTEPSFFHIRGKRSSEQPPLDLGPAYFHIRGKRTKNPPIDLGPAYFHIRGKRLSGEQPPYLDLTPAYFHIRGKRTQQPPMIDLSEPAFFHIRGRRAVEQPPYLDLTPSYFHIRGKRTEYPPFLELGQPSYFHIRGRRAEKTTKD	1
HIRamide	Nvec_HIRamide	DL	TEPSFFHIR	GKR	MRLYLFVPVFALVLAVEGASDEKRDSKQPPIDLSPAAYFHIRGKRTYNAPPLDLSGPAYFHIRGKRTAKQPPYLDLGEPSFFHIRGKRTEGPPYIDLTEPSFFHIRGKRSSEQPPLDLGPAYFHIRGKRTKNPPIDLGPAYFHIRGKRLSGEQPPYLDLTPAYFHIRGKRTQQPPMIDLSEPAFFHIRGRRAVEQPPYLDLTPSYFHIRGKRTEYPPFLELGQPSYFHIRGRRAEKTTKD	1
HIRamide	Nvec_HIRamide	TE	YPPFLELGQPSYFHIR	GRR	MRLYLFVPVFALVLAVEGASDEKRDSKQPPIDLSPAAYFHIRGKRTYNAPPLDLSGPAYFHIRGKRTAKQPPYLDLGEPSFFHIRGKRTEGPPYIDLTEPSFFHIRGKRSSEQPPLDLGPAYFHIRGKRTKNPPIDLGPAYFHIRGKRLSGEQPPYLDLTPAYFHIRGKRTQQPPMIDLSEPAFFHIRGRRAVEQPPYLDLTPSYFHIRGKRTEYPPFLELGQPSYFHIRGRRAEKTTKD	1
QWamide	Nvec_QWamide	KK	EIPPQGFRFNQW	GKK	MLKLITLAKSAQFKLTKRSRIYIKASFYNHAWCLHRLLWLSSYCRKSKFRQGLTDQPMDESKEIPPQGLRFSQWGKKEIPPQGFRFNQWGKKEIPPQGLRFNQWGKKEIPPQGFRFSQWGKKEIPPQGFRFNQWGKKEIPPQGLRFNQWGKKEIPPQGLRFNQWGKKEIPPQGLRFSQWGKREIPPQGLRFNQWGKKEIPPQGLRFNQWGKKEIPPQGLRFNQWGKKEIPPQGLRFNQWGKKEIPPQGLRFNQWGKKEIPPQGLRFNQWGKKEIPPQGLRFSQWGKKEIPPQGLRFNQWGKKEIPPQGLRFNQWGKRKLINQVMI	0
QWamide	Nvec_QWamide	KK	EIPPQGLRFNQW	GKK	MLKLITLAKSAQFKLTKRSRIYIKASFYNHAWCLHRLLWLSSYCRKSKFRQGLTDQPMDESKEIPPQGLRFSQWGKKEIPPQGFRFNQWGKKEIPPQGLRFNQWGKKEIPPQGFRFSQWGKKEIPPQGFRFNQWGKKEIPPQGLRFNQWGKKEIPPQGLRFNQWGKKEIPPQGLRFSQWGKREIPPQGLRFNQWGKKEIPPQGLRFNQWGKKEIPPQGLRFNQWGKKEIPPQGLRFNQWGKKEIPPQGLRFNQWGKKEIPPQGLRFNQWGKKEIPPQGLRFSQWGKKEIPPQGLRFNQWGKKEIPPQGLRFNQWGKRKLINQVMI	0
QWamide	Nvec_QWamide	SK	EIPPQGLRFSQW	GKK	MLKLITLAKSAQFKLTKRSRIYIKASFYNHAWCLHRLLWLSSYCRKSKFRQGLTDQPMDESKEIPPQGLRFSQWGKKEIPPQGFRFNQWGKKEIPPQGLRFNQWGKKEIPPQGFRFSQWGKKEIPPQGFRFNQWGKKEIPPQGLRFNQWGKKEIPPQGLRFNQWGKKEIPPQGLRFSQWGKREIPPQGLRFNQWGKKEIPPQGLRFNQWGKKEIPPQGLRFNQWGKKEIPPQGLRFNQWGKKEIPPQGLRFNQWGKKEIPPQGLRFNQWGKKEIPPQGLRFSQWGKKEIPPQGLRFNQWGKKEIPPQGLRFNQWGKRKLINQVMI	0
QWamide	Nvec_QWamide	KE	IPPQGFRFNQW	GKK	MLKLITLAKSAQFKLTKRSRIYIKASFYNHAWCLHRLLWLSSYCRKSKFRQGLTDQPMDESKEIPPQGLRFSQWGKKEIPPQGFRFNQWGKKEIPPQGLRFNQWGKKEIPPQGFRFSQWGKKEIPPQGFRFNQWGKKEIPPQGLRFNQWGKKEIPPQGLRFNQWGKKEIPPQGLRFSQWGKREIPPQGLRFNQWGKKEIPPQGLRFNQWGKKEIPPQGLRFNQWGKKEIPPQGLRFNQWGKKEIPPQGLRFNQWGKKEIPPQGLRFNQWGKKEIPPQGLRFSQWGKKEIPPQGLRFNQWGKKEIPPQGLRFNQWGKRKLINQVMI	0
QWamide	Nvec_QWamide	KE	IPPQGLRFNQW	GKK	MLKLITLAKSAQFKLTKRSRIYIKASFYNHAWCLHRLLWLSSYCRKSKFRQGLTDQPMDESKEIPPQGLRFSQWGKKEIPPQGFRFNQWGKKEIPPQGLRFNQWGKKEIPPQGFRFSQWGKKEIPPQGFRFNQWGKKEIPPQGLRFNQWGKKEIPPQGLRFNQWGKKEIPPQGLRFSQWGKREIPPQGLRFNQWGKKEIPPQGLRFNQWGKKEIPPQGLRFNQWGKKEIPPQGLRFNQWGKKEIPPQGLRFNQWGKKEIPPQGLRFNQWGKKEIPPQGLRFSQWGKKEIPPQGLRFNQWGKKEIPPQGLRFNQWGKRKLINQVMI	0
QWamide	Nvec_QWamide	KE	IPPQGLRFNQWG	KK	MLKLITLAKSAQFKLTKRSRIYIKASFYNHAWCLHRLLWLSSYCRKSKFRQGLTDQPMDESKEIPPQGLRFSQWGKKEIPPQGFRFNQWGKKEIPPQGLRFNQWGKKEIPPQGFRFSQWGKKEIPPQGFRFNQWGKKEIPPQGLRFNQWGKKEIPPQGLRFNQWGKKEIPPQGLRFSQWGKREIPPQGLRFNQWGKKEIPPQGLRFNQWGKKEIPPQGLRFNQWGKKEIPPQGLRFNQWGKKEIPPQGLRFNQWGKKEIPPQGLRFNQWGKKEIPPQGLRFSQWGKKEIPPQGLRFNQWGKKEIPPQGLRFNQWGKRKLINQVMI	0
QWamide	Nvec_QWamide	KE	IPPQGLRFSQW	GKK	MLKLITLAKSAQFKLTKRSRIYIKASFYNHAWCLHRLLWLSSYCRKSKFRQGLTDQPMDESKEIPPQGLRFSQWGKKEIPPQGFRFNQWGKKEIPPQGLRFNQWGKKEIPPQGFRFSQWGKKEIPPQGFRFNQWGKKEIPPQGLRFNQWGKKEIPPQGLRFNQWGKKEIPPQGLRFSQWGKREIPPQGLRFNQWGKKEIPPQGLRFNQWGKKEIPPQGLRFNQWGKKEIPPQGLRFNQWGKKEIPPQGLRFNQWGKKEIPPQGLRFNQWGKKEIPPQGLRFSQWGKKEIPPQGLRFNQWGKKEIPPQGLRFNQWGKRKLINQVMI	0
RPamide	Nvec_RPamide_EDO37503.p1	YE	FPPGFHRP	GKK	MKVLCVTLVLMALVCSVQSRNLRHKDYERELQDYRRDFARALSMVEQDAFLPKPRPGRREQDSSNYEFPPGFHRPGKKRSFKEEK	1
RPamide	Nvec_RPamide_EDO37503.p1	RE	QDSSNYEFPPGFHRP	GKK	MKVLCVTLVLMALVCSVQSRNLRHKDYERELQDYRRDFARALSMVEQDAFLPKPRPGRREQDSSNYEFPPGFHRPGKKRSFKEEK	1
RPamide	Nvec_RPamide_EDO37503.p1	EF	PPGFHRP	GKK	MKVLCVTLVLMALVCSVQSRNLRHKDYERELQDYRRDFARALSMVEQDAFLPKPRPGRREQDSSNYEFPPGFHRPGKKRSFKEEK	1
RPamide	Nvec_RPamide_EDO37503.p1	VE	QDAFLPKPRP	GRR	MKVLCVTLVLMALVCSVQSRNLRHKDYERELQDYRRDFARALSMVEQDAFLPKPRPGRREQDSSNYEFPPGFHRPGKKRSFKEEK	1
RPamide	Nvec_RPamide_EDO37503.p1	VE	QDAFLPKPRPG	RR	MKVLCVTLVLMALVCSVQSRNLRHKDYERELQDYRRDFARALSMVEQDAFLPKPRPGRREQDSSNYEFPPGFHRPGKKRSFKEEK	1
WRHamide	NVEC200_002800_1.1|Nvec_VRHamide	EN	DEPGPPMIKIPVRH	GKR	MKITPVMSCLVLASALLVTAECYRITDPGDLEKPQENDEPGPPMIKIPVRHGKREFNDDLEDTTLLHYPFRVARKRELFNAGGPPPIYLPVRPGKRGYYRDNIQETRQYLDPRPGKRSRNH	1
WRHamide	NVEC200_002800_1.1|Nvec_VRHamide	ND	EPGPPMIKIPVRH	GKR	MKITPVMSCLVLASALLVTAECYRITDPGDLEKPQENDEPGPPMIKIPVRHGKREFNDDLEDTTLLHYPFRVARKRELFNAGGPPPIYLPVRPGKRGYYRDNIQETRQYLDPRPGKRSRNH	1
WRHamide	NVEC200_002800_1.1|Nvec_VRHamide	ND	EPGPPMIKIPVRHG	KR	MKITPVMSCLVLASALLVTAECYRITDPGDLEKPQENDEPGPPMIKIPVRHGKREFNDDLEDTTLLHYPFRVARKRELFNAGGPPPIYLPVRPGKRGYYRDNIQETRQYLDPRPGKRSRNH	1
WRHamide	NVEC200_002800_1.1|Nvec_VRHamide	NA	GGPPPIYLPVRP	GKR	MKITPVMSCLVLASALLVTAECYRITDPGDLEKPQENDEPGPPMIKIPVRHGKREFNDDLEDTTLLHYPFRVARKRELFNAGGPPPIYLPVRPGKRGYYRDNIQETRQYLDPRPGKRSRNH	1
WRHamide	NVEC200_002800_1.1|Nvec_VRHamide	EP	GPPMIKIPVRH	GKR	MKITPVMSCLVLASALLVTAECYRITDPGDLEKPQENDEPGPPMIKIPVRHGKREFNDDLEDTTLLHYPFRVARKRELFNAGGPPPIYLPVRPGKRGYYRDNIQETRQYLDPRPGKRSRNH	1
WRHamide	NVEC200_002800_1.1|Nvec_VRHamide	AG	GPPPIYLPVRPG	KR	MKITPVMSCLVLASALLVTAECYRITDPGDLEKPQENDEPGPPMIKIPVRHGKREFNDDLEDTTLLHYPFRVARKRELFNAGGPPPIYLPVRPGKRGYYRDNIQETRQYLDPRPGKRSRNH	1
WRHamide	NVEC200_002800_1.1|Nvec_VRHamide	GP	PMIKIPVRH	GKR	MKITPVMSCLVLASALLVTAECYRITDPGDLEKPQENDEPGPPMIKIPVRHGKREFNDDLEDTTLLHYPFRVARKRELFNAGGPPPIYLPVRPGKRGYYRDNIQETRQYLDPRPGKRSRNH	1
WRHamide	NVEC200_002800_1.1|Nvec_VRHamide	GP	PPIYLPVRP	GKR	MKITPVMSCLVLASALLVTAECYRITDPGDLEKPQENDEPGPPMIKIPVRHGKREFNDDLEDTTLLHYPFRVARKRELFNAGGPPPIYLPVRPGKRGYYRDNIQETRQYLDPRPGKRSRNH	1
WRHamide	NVEC200_002800_1.1|Nvec_VRHamide	GG	PPPIYLPVRP	GKR	MKITPVMSCLVLASALLVTAECYRITDPGDLEKPQENDEPGPPMIKIPVRHGKREFNDDLEDTTLLHYPFRVARKRELFNAGGPPPIYLPVRPGKRGYYRDNIQETRQYLDPRPGKRSRNH	1
WRHamide	NVEC200_002800_1.1|Nvec_VRHamide	TR	QYLDPRP	GKR	MKITPVMSCLVLASALLVTAECYRITDPGDLEKPQENDEPGPPMIKIPVRHGKREFNDDLEDTTLLHYPFRVARKRELFNAGGPPPIYLPVRPGKRGYYRDNIQETRQYLDPRPGKRSRNH	1
RPamide	NVEC200_002806_1.1	YE	FPPGFHRP	GKK	HSFRRTLKVDCSRLLSRDLSIVISRFKMKVLCVTLVLMALVCSVQSRNLRHKDYERELQDYRRDFARALSMVEQDAFLPKPRPGRREQDSSNYEFPPGFHRPGKKRSFKEEK	0
RPamide	NVEC200_002806_1.1	RE	QDSSNYEFPPGFHRP	GKK	HSFRRTLKVDCSRLLSRDLSIVISRFKMKVLCVTLVLMALVCSVQSRNLRHKDYERELQDYRRDFARALSMVEQDAFLPKPRPGRREQDSSNYEFPPGFHRPGKKRSFKEEK	0
RPamide	NVEC200_002806_1.1	EF	PPGFHRP	GKK	HSFRRTLKVDCSRLLSRDLSIVISRFKMKVLCVTLVLMALVCSVQSRNLRHKDYERELQDYRRDFARALSMVEQDAFLPKPRPGRREQDSSNYEFPPGFHRPGKKRSFKEEK	0
RPamide	NVEC200_002806_1.1	VE	QDAFLPKPRP	GRR	HSFRRTLKVDCSRLLSRDLSIVISRFKMKVLCVTLVLMALVCSVQSRNLRHKDYERELQDYRRDFARALSMVEQDAFLPKPRPGRREQDSSNYEFPPGFHRPGKKRSFKEEK	0
RPamide	NVEC200_002806_1.1	VE	QDAFLPKPRPG	RR	HSFRRTLKVDCSRLLSRDLSIVISRFKMKVLCVTLVLMALVCSVQSRNLRHKDYERELQDYRRDFARALSMVEQDAFLPKPRPGRREQDSSNYEFPPGFHRPGKKRSFKEEK	0
	NVEC200_004847_1.1	KR	EIYEWIKTLH	KR	MRGKMFTYLVVAFLVVFFDEAVTKTLTDSDIEKDLANILNPDDTPETDRQGRSGEDDKLLEKLIEETPQSVSRDDKQRSNVFLTAEEKRQKIRRILKKLTEDAQDRFSDPLHHQRRISNLRGHFSDVPEILTESGPGSPPGYNVIKPGTPEGPSNDNPLNQDGLSSDEIYNNGAVYNVPDKIPAPPKPADDVPVFRKDESLLKEKREIYEWIKTLHKRGEHMPSAVARLIRDAIKRKSQA	1
PRGamide	NVEC200_004869_1.1|Nvec_PRGamide	LD	APRGGRSLLDLLAAPRG	GRD	MAYFKWTLCAFVLAVLCLSTNYVAGEKNEEKSEKSTLLQELSKKDFDKELAADEAIVLELLKEKADDLDEESLLDLLAPRGGRDAPRGGRSLLDAPRGGRSLLDLLAAPRGGRDAPRGGRSLTELLNAPRRGRSLADLLDAPRGGRSLAELLDAPRGGRSIEAPRGGRSLAELLEAPRGGRSLIELLEAPRGGRSVEAPRGGRSILELLTAPRGGRSAPRGGRSAEKSDAIHKEKKAPRGGRKRRSLPEEEMDGPRGGRSAVSGRSSEDGPRGGRAVYGPRGGRSFDGSRGGRSYDGPRGGRSMENGPRGGRATEFGPRGGRSYEGSRGGREIDGPRGGRSFKEGPRGGRAVEGPRGGRDLYEEGPRGGREVYLEGPRGGRDLVLEGPRGGRDLYEEGP…	0
WFSamide	NVEC200_005035_1.1	DN	APPGNEEGEARFIPWFS	GKR	YLIALDARHYPRLYLEMSNYFLHWVTALAFILCSGLANGKIPKVPIKEVENAPPSTGEGEAGFIPWFSGKREFEPKNALKNDNAPPGNGEGEAGFIPWFSGKREFEPKKALKNDNAPPGNEEGEARFIPWFSGKRELIPKIVLQNDNAPPGNGEGEAGFIPWFSGKREFEQKNALQNDNAPPGNGEGEAGFIPWFSGKREFEPKNALQNDNAPPGNGEGEAGFIPWFSGKRDTTKAAVQNDLVPPSKGAGEQGFIPWFSGKRTVNRLKEINTENDADANKAPPSGHNEAGFIPWFAGKRKV	1
WFSamide	NVEC200_005035_1.1	DN	APPGNGEGEAGFIPWFS	GKR	YLIALDARHYPRLYLEMSNYFLHWVTALAFILCSGLANGKIPKVPIKEVENAPPSTGEGEAGFIPWFSGKREFEPKNALKNDNAPPGNGEGEAGFIPWFSGKREFEPKKALKNDNAPPGNEEGEARFIPWFSGKRELIPKIVLQNDNAPPGNGEGEAGFIPWFSGKREFEQKNALQNDNAPPGNGEGEAGFIPWFSGKREFEPKNALQNDNAPPGNGEGEAGFIPWFSGKRDTTKAAVQNDLVPPSKGAGEQGFIPWFSGKRTVNRLKEINTENDADANKAPPSGHNEAGFIPWFAGKRKV	1
WFSamide	NVEC200_005035_1.1	NK	APPSGHNEAGFIPWFA	GKR	YLIALDARHYPRLYLEMSNYFLHWVTALAFILCSGLANGKIPKVPIKEVENAPPSTGEGEAGFIPWFSGKREFEPKNALKNDNAPPGNGEGEAGFIPWFSGKREFEPKKALKNDNAPPGNEEGEARFIPWFSGKRELIPKIVLQNDNAPPGNGEGEAGFIPWFSGKREFEQKNALQNDNAPPGNGEGEAGFIPWFSGKREFEPKNALQNDNAPPGNGEGEAGFIPWFSGKRDTTKAAVQNDLVPPSKGAGEQGFIPWFSGKRTVNRLKEINTENDADANKAPPSGHNEAGFIPWFAGKRKV	1
WFSamide	NVEC200_005035_1.1	EN	APPSTGEGEAGFIPWFS	GKR	YLIALDARHYPRLYLEMSNYFLHWVTALAFILCSGLANGKIPKVPIKEVENAPPSTGEGEAGFIPWFSGKREFEPKNALKNDNAPPGNGEGEAGFIPWFSGKREFEPKKALKNDNAPPGNEEGEARFIPWFSGKRELIPKIVLQNDNAPPGNGEGEAGFIPWFSGKREFEQKNALQNDNAPPGNGEGEAGFIPWFSGKREFEPKNALQNDNAPPGNGEGEAGFIPWFSGKRDTTKAAVQNDLVPPSKGAGEQGFIPWFSGKRTVNRLKEINTENDADANKAPPSGHNEAGFIPWFAGKRKV	1
WFSamide	NVEC200_005035_1.1	DL	VPPSKGAGEQGFIPWFS	GKR	YLIALDARHYPRLYLEMSNYFLHWVTALAFILCSGLANGKIPKVPIKEVENAPPSTGEGEAGFIPWFSGKREFEPKNALKNDNAPPGNGEGEAGFIPWFSGKREFEPKKALKNDNAPPGNEEGEARFIPWFSGKRELIPKIVLQNDNAPPGNGEGEAGFIPWFSGKREFEQKNALQNDNAPPGNGEGEAGFIPWFSGKREFEPKNALQNDNAPPGNGEGEAGFIPWFSGKRDTTKAAVQNDLVPPSKGAGEQGFIPWFSGKRTVNRLKEINTENDADANKAPPSGHNEAGFIPWFAGKRKV	1
	NVEC200_005515_1.1	KR	EKLEEITGFAKMKKPYSS	RR	MNKISALLFLGCVVAITWAFPREETMASEGPENETRIEDAEELESKSSYLSKREKLEEITGFAKMKKPYSSRREKLEEMRAFDRKRQTKEQVICEGPAKLALESYHIDLSKSHLCGENSKRWANDFKSFLRKRELEYHMSSNYRRNMNACCSPDCDWLLQYLEVDSQVIKCVDKK	0
QWamide	NVEC200_009895_1.1	RR	EIPPQGFRFNQW	GKK	MRGVFIVFFGFLLTVVSAKSAEERPTKDVRREIPPQGFRFNQWGKKEIPPQGFRFNQWGKKEIPPQGLRFNQWGKKEIPPQGFRFNQWGKKEIPPQGFRFNQWGKKEIPPQGFRFNQWGKKEIPPQGLRFNQWGKKEIPPQGLRFSQWGKKEIPPQGFRFNQWEKKEIPPQGLRFNQWGKKEIPPQGLRFNQWGKKEIPPQGLRFSQWGKREIPPQGLRFNQWGKKEIPPQGLRFNQWGKKEIPPQGLRFSQWGKKEIPPQGLRFNQWGKKEIPPQGLRFNQWGKRKLINQVMI	1
QWamide	NVEC200_009895_1.1	KK	EIPPQGLRFNQW	GKK	MRGVFIVFFGFLLTVVSAKSAEERPTKDVRREIPPQGFRFNQWGKKEIPPQGFRFNQWGKKEIPPQGLRFNQWGKKEIPPQGFRFNQWGKKEIPPQGFRFNQWGKKEIPPQGFRFNQWGKKEIPPQGLRFNQWGKKEIPPQGLRFSQWGKKEIPPQGFRFNQWEKKEIPPQGLRFNQWGKKEIPPQGLRFNQWGKKEIPPQGLRFSQWGKREIPPQGLRFNQWGKKEIPPQGLRFNQWGKKEIPPQGLRFSQWGKKEIPPQGLRFNQWGKKEIPPQGLRFNQWGKRKLINQVMI	1
QWamide	NVEC200_009895_1.1	KK	EIPPQGLRFSQW	GKK	MRGVFIVFFGFLLTVVSAKSAEERPTKDVRREIPPQGFRFNQWGKKEIPPQGFRFNQWGKKEIPPQGLRFNQWGKKEIPPQGFRFNQWGKKEIPPQGFRFNQWGKKEIPPQGFRFNQWGKKEIPPQGLRFNQWGKKEIPPQGLRFSQWGKKEIPPQGFRFNQWEKKEIPPQGLRFNQWGKKEIPPQGLRFNQWGKKEIPPQGLRFSQWGKREIPPQGLRFNQWGKKEIPPQGLRFNQWGKKEIPPQGLRFSQWGKKEIPPQGLRFNQWGKKEIPPQGLRFNQWGKRKLINQVMI	1
QWamide	NVEC200_009895_1.1	RE	IPPQGFRFNQW	GKK	MRGVFIVFFGFLLTVVSAKSAEERPTKDVRREIPPQGFRFNQWGKKEIPPQGFRFNQWGKKEIPPQGLRFNQWGKKEIPPQGFRFNQWGKKEIPPQGFRFNQWGKKEIPPQGFRFNQWGKKEIPPQGLRFNQWGKKEIPPQGLRFSQWGKKEIPPQGFRFNQWEKKEIPPQGLRFNQWGKKEIPPQGLRFNQWGKKEIPPQGLRFSQWGKREIPPQGLRFNQWGKKEIPPQGLRFNQWGKKEIPPQGLRFSQWGKKEIPPQGLRFNQWGKKEIPPQGLRFNQWGKRKLINQVMI	1
QWamide	NVEC200_009895_1.1	KE	IPPQGFRFNQWE	KK	MRGVFIVFFGFLLTVVSAKSAEERPTKDVRREIPPQGFRFNQWGKKEIPPQGFRFNQWGKKEIPPQGLRFNQWGKKEIPPQGFRFNQWGKKEIPPQGFRFNQWGKKEIPPQGFRFNQWGKKEIPPQGLRFNQWGKKEIPPQGLRFSQWGKKEIPPQGFRFNQWEKKEIPPQGLRFNQWGKKEIPPQGLRFNQWGKKEIPPQGLRFSQWGKREIPPQGLRFNQWGKKEIPPQGLRFNQWGKKEIPPQGLRFSQWGKKEIPPQGLRFNQWGKKEIPPQGLRFNQWGKRKLINQVMI	1
QWamide	NVEC200_009895_1.1	KE	IPPQGLRFNQW	GKK	MRGVFIVFFGFLLTVVSAKSAEERPTKDVRREIPPQGFRFNQWGKKEIPPQGFRFNQWGKKEIPPQGLRFNQWGKKEIPPQGFRFNQWGKKEIPPQGFRFNQWGKKEIPPQGFRFNQWGKKEIPPQGLRFNQWGKKEIPPQGLRFSQWGKKEIPPQGFRFNQWEKKEIPPQGLRFNQWGKKEIPPQGLRFNQWGKKEIPPQGLRFSQWGKREIPPQGLRFNQWGKKEIPPQGLRFNQWGKKEIPPQGLRFSQWGKKEIPPQGLRFNQWGKKEIPPQGLRFNQWGKRKLINQVMI	1
QWamide	NVEC200_009895_1.1	KE	IPPQGLRFNQWG	KK	MRGVFIVFFGFLLTVVSAKSAEERPTKDVRREIPPQGFRFNQWGKKEIPPQGFRFNQWGKKEIPPQGLRFNQWGKKEIPPQGFRFNQWGKKEIPPQGFRFNQWGKKEIPPQGFRFNQWGKKEIPPQGLRFNQWGKKEIPPQGLRFSQWGKKEIPPQGFRFNQWEKKEIPPQGLRFNQWGKKEIPPQGLRFNQWGKKEIPPQGLRFSQWGKREIPPQGLRFNQWGKKEIPPQGLRFNQWGKKEIPPQGLRFSQWGKKEIPPQGLRFNQWGKKEIPPQGLRFNQWGKRKLINQVMI	1
QWamide	NVEC200_009895_1.1	KE	IPPQGLRFSQW	GKK	MRGVFIVFFGFLLTVVSAKSAEERPTKDVRREIPPQGFRFNQWGKKEIPPQGFRFNQWGKKEIPPQGLRFNQWGKKEIPPQGFRFNQWGKKEIPPQGFRFNQWGKKEIPPQGFRFNQWGKKEIPPQGLRFNQWGKKEIPPQGLRFSQWGKKEIPPQGFRFNQWEKKEIPPQGLRFNQWGKKEIPPQGLRFNQWGKKEIPPQGLRFSQWGKREIPPQGLRFNQWGKKEIPPQGLRFNQWGKKEIPPQGLRFSQWGKKEIPPQGLRFNQWGKKEIPPQGLRFNQWGKRKLINQVMI	1
GWA peptide	NVEC200_010517_1.1	AM	QWGHKGWA	KR	TSFRAVEQGITMSRLVILLVFCLVLVSLALGQLITEGGEGINAGGACKRANGMACSDTTQGWEKVDMKRQVRISETTDPWVWEPKRQRLAKVGREQKEDEDNNLGGGGWFRRQAMQWGHKGWAKRQAQLNEGWKSVNDDKGWAKRQAQLNEGWKSVNDDKGWAKPQAQMNEGWKSVNDDKGWAKPHAQLNEGWKSVNDDKGWAKPQAQLNEGWKSANYDKGWAKRQAKLNKGWESANYDKGWAKRQAQLNDGWMHRQAAWRDEGKDKSGDKDLRFWGVAGRH	0
GWA peptide	NVEC200_010517_1.1	KR	QAKLNKGWESANYDKGWA	KR	TSFRAVEQGITMSRLVILLVFCLVLVSLALGQLITEGGEGINAGGACKRANGMACSDTTQGWEKVDMKRQVRISETTDPWVWEPKRQRLAKVGREQKEDEDNNLGGGGWFRRQAMQWGHKGWAKRQAQLNEGWKSVNDDKGWAKRQAQLNEGWKSVNDDKGWAKPQAQMNEGWKSVNDDKGWAKPHAQLNEGWKSVNDDKGWAKPQAQLNEGWKSANYDKGWAKRQAKLNKGWESANYDKGWAKRQAQLNDGWMHRQAAWRDEGKDKSGDKDLRFWGVAGRH	0
GWA peptide	NVEC200_010517_1.1	RR	QAMQWGHKGWA	KR	TSFRAVEQGITMSRLVILLVFCLVLVSLALGQLITEGGEGINAGGACKRANGMACSDTTQGWEKVDMKRQVRISETTDPWVWEPKRQRLAKVGREQKEDEDNNLGGGGWFRRQAMQWGHKGWAKRQAQLNEGWKSVNDDKGWAKRQAQLNEGWKSVNDDKGWAKPQAQMNEGWKSVNDDKGWAKPHAQLNEGWKSVNDDKGWAKPQAQLNEGWKSANYDKGWAKRQAKLNKGWESANYDKGWAKRQAQLNDGWMHRQAAWRDEGKDKSGDKDLRFWGVAGRH	0
HIRamide	NVEC200_013206_1.1	HN	APPLDLSGPAYFHIR	GKR	MRLYLFVPVFALVLAVEGASDEKRDSKQPPIDLSPAAYFHIRGKRTHNAPPLDLSGPAYFHIRGKRTAKQPPYLDLGEPSFFHIRGKRTEGPPYIDLTEPSFFHIRGKRSSEQPPLDLGPAYFHIRGKRTKNPPIDLGPAYFHIRGKRLSGEQPPYLDLTPAYFHIRGKRTQQPPMIDLSEPAFFHIRGRRAVEQPPYLDLTPSYFHIRGKRTEYPPFLELGQPSYFHIRGRRAEKTTKD	1
HIRamide	NVEC200_013206_1.1	LS	EPAFFHIR	GRR	MRLYLFVPVFALVLAVEGASDEKRDSKQPPIDLSPAAYFHIRGKRTHNAPPLDLSGPAYFHIRGKRTAKQPPYLDLGEPSFFHIRGKRTEGPPYIDLTEPSFFHIRGKRSSEQPPLDLGPAYFHIRGKRTKNPPIDLGPAYFHIRGKRLSGEQPPYLDLTPAYFHIRGKRTQQPPMIDLSEPAFFHIRGRRAVEQPPYLDLTPSYFHIRGKRTEYPPFLELGQPSYFHIRGRRAEKTTKD	1
HIRamide	NVEC200_013206_1.1	LG	EPSFFHIR	GKR	MRLYLFVPVFALVLAVEGASDEKRDSKQPPIDLSPAAYFHIRGKRTHNAPPLDLSGPAYFHIRGKRTAKQPPYLDLGEPSFFHIRGKRTEGPPYIDLTEPSFFHIRGKRSSEQPPLDLGPAYFHIRGKRTKNPPIDLGPAYFHIRGKRLSGEQPPYLDLTPAYFHIRGKRTQQPPMIDLSEPAFFHIRGRRAVEQPPYLDLTPSYFHIRGKRTEYPPFLELGQPSYFHIRGRRAEKTTKD	1
HIRamide	NVEC200_013206_1.1	DL	GEPSFFHIR	GKR	MRLYLFVPVFALVLAVEGASDEKRDSKQPPIDLSPAAYFHIRGKRTHNAPPLDLSGPAYFHIRGKRTAKQPPYLDLGEPSFFHIRGKRTEGPPYIDLTEPSFFHIRGKRSSEQPPLDLGPAYFHIRGKRTKNPPIDLGPAYFHIRGKRLSGEQPPYLDLTPAYFHIRGKRTQQPPMIDLSEPAFFHIRGRRAVEQPPYLDLTPSYFHIRGKRTEYPPFLELGQPSYFHIRGRRAEKTTKD	1
HIRamide	NVEC200_013206_1.1	TE	GPPYIDLTEPSFFHIR	GKR	MRLYLFVPVFALVLAVEGASDEKRDSKQPPIDLSPAAYFHIRGKRTHNAPPLDLSGPAYFHIRGKRTAKQPPYLDLGEPSFFHIRGKRTEGPPYIDLTEPSFFHIRGKRSSEQPPLDLGPAYFHIRGKRTKNPPIDLGPAYFHIRGKRLSGEQPPYLDLTPAYFHIRGKRTQQPPMIDLSEPAFFHIRGRRAVEQPPYLDLTPSYFHIRGKRTEYPPFLELGQPSYFHIRGRRAEKTTKD	1
HIRamide	NVEC200_013206_1.1	LD	LGPAYFHIR	GKR	MRLYLFVPVFALVLAVEGASDEKRDSKQPPIDLSPAAYFHIRGKRTHNAPPLDLSGPAYFHIRGKRTAKQPPYLDLGEPSFFHIRGKRTEGPPYIDLTEPSFFHIRGKRSSEQPPLDLGPAYFHIRGKRTKNPPIDLGPAYFHIRGKRLSGEQPPYLDLTPAYFHIRGKRTQQPPMIDLSEPAFFHIRGRRAVEQPPYLDLTPSYFHIRGKRTEYPPFLELGQPSYFHIRGRRAEKTTKD	1
HIRamide	NVEC200_013206_1.1	ID	LSPAAYFHIR	GKR	MRLYLFVPVFALVLAVEGASDEKRDSKQPPIDLSPAAYFHIRGKRTHNAPPLDLSGPAYFHIRGKRTAKQPPYLDLGEPSFFHIRGKRTEGPPYIDLTEPSFFHIRGKRSSEQPPLDLGPAYFHIRGKRTKNPPIDLGPAYFHIRGKRLSGEQPPYLDLTPAYFHIRGKRTQQPPMIDLSEPAFFHIRGRRAVEQPPYLDLTPSYFHIRGKRTEYPPFLELGQPSYFHIRGRRAEKTTKD	1
HIRamide	NVEC200_013206_1.1	LD	LTPAYFHIR	GKR	MRLYLFVPVFALVLAVEGASDEKRDSKQPPIDLSPAAYFHIRGKRTHNAPPLDLSGPAYFHIRGKRTAKQPPYLDLGEPSFFHIRGKRTEGPPYIDLTEPSFFHIRGKRSSEQPPLDLGPAYFHIRGKRTKNPPIDLGPAYFHIRGKRLSGEQPPYLDLTPAYFHIRGKRTQQPPMIDLSEPAFFHIRGRRAVEQPPYLDLTPSYFHIRGKRTEYPPFLELGQPSYFHIRGRRAEKTTKD	1
HIRamide	NVEC200_013206_1.1	LD	LTPSYFHIR	GKR	MRLYLFVPVFALVLAVEGASDEKRDSKQPPIDLSPAAYFHIRGKRTHNAPPLDLSGPAYFHIRGKRTAKQPPYLDLGEPSFFHIRGKRTEGPPYIDLTEPSFFHIRGKRSSEQPPLDLGPAYFHIRGKRTKNPPIDLGPAYFHIRGKRLSGEQPPYLDLTPAYFHIRGKRTQQPPMIDLSEPAFFHIRGRRAVEQPPYLDLTPSYFHIRGKRTEYPPFLELGQPSYFHIRGRRAEKTTKD	1
HIRamide	NVEC200_013206_1.1	TK	NPPIDLGPAYFHIR	GKR	MRLYLFVPVFALVLAVEGASDEKRDSKQPPIDLSPAAYFHIRGKRTHNAPPLDLSGPAYFHIRGKRTAKQPPYLDLGEPSFFHIRGKRTEGPPYIDLTEPSFFHIRGKRSSEQPPLDLGPAYFHIRGKRTKNPPIDLGPAYFHIRGKRLSGEQPPYLDLTPAYFHIRGKRTQQPPMIDLSEPAFFHIRGRRAVEQPPYLDLTPSYFHIRGKRTEYPPFLELGQPSYFHIRGRRAEKTTKD	1
HIRamide	NVEC200_013206_1.1	SK	QPPIDLSPAAYFHIR	GKR	MRLYLFVPVFALVLAVEGASDEKRDSKQPPIDLSPAAYFHIRGKRTHNAPPLDLSGPAYFHIRGKRTAKQPPYLDLGEPSFFHIRGKRTEGPPYIDLTEPSFFHIRGKRSSEQPPLDLGPAYFHIRGKRTKNPPIDLGPAYFHIRGKRLSGEQPPYLDLTPAYFHIRGKRTQQPPMIDLSEPAFFHIRGRRAVEQPPYLDLTPSYFHIRGKRTEYPPFLELGQPSYFHIRGRRAEKTTKD	1
HIRamide	NVEC200_013206_1.1	SE	QPPLDLGPAYFHIR	GKR	MRLYLFVPVFALVLAVEGASDEKRDSKQPPIDLSPAAYFHIRGKRTHNAPPLDLSGPAYFHIRGKRTAKQPPYLDLGEPSFFHIRGKRTEGPPYIDLTEPSFFHIRGKRSSEQPPLDLGPAYFHIRGKRTKNPPIDLGPAYFHIRGKRLSGEQPPYLDLTPAYFHIRGKRTQQPPMIDLSEPAFFHIRGRRAVEQPPYLDLTPSYFHIRGKRTEYPPFLELGQPSYFHIRGRRAEKTTKD	1
HIRamide	NVEC200_013206_1.1	SE	QPPLDLGPAYFHIRG	KR	MRLYLFVPVFALVLAVEGASDEKRDSKQPPIDLSPAAYFHIRGKRTHNAPPLDLSGPAYFHIRGKRTAKQPPYLDLGEPSFFHIRGKRTEGPPYIDLTEPSFFHIRGKRSSEQPPLDLGPAYFHIRGKRTKNPPIDLGPAYFHIRGKRLSGEQPPYLDLTPAYFHIRGKRTQQPPMIDLSEPAFFHIRGRRAVEQPPYLDLTPSYFHIRGKRTEYPPFLELGQPSYFHIRGRRAEKTTKD	1
HIRamide	NVEC200_013206_1.1	TQ	QPPMIDLSEPAFFHIR	GRR	MRLYLFVPVFALVLAVEGASDEKRDSKQPPIDLSPAAYFHIRGKRTHNAPPLDLSGPAYFHIRGKRTAKQPPYLDLGEPSFFHIRGKRTEGPPYIDLTEPSFFHIRGKRSSEQPPLDLGPAYFHIRGKRTKNPPIDLGPAYFHIRGKRLSGEQPPYLDLTPAYFHIRGKRTQQPPMIDLSEPAFFHIRGRRAVEQPPYLDLTPSYFHIRGKRTEYPPFLELGQPSYFHIRGRRAEKTTKD	1
HIRamide	NVEC200_013206_1.1	AK	QPPYLDLGEPSFFHIR	GKR	MRLYLFVPVFALVLAVEGASDEKRDSKQPPIDLSPAAYFHIRGKRTHNAPPLDLSGPAYFHIRGKRTAKQPPYLDLGEPSFFHIRGKRTEGPPYIDLTEPSFFHIRGKRSSEQPPLDLGPAYFHIRGKRTKNPPIDLGPAYFHIRGKRLSGEQPPYLDLTPAYFHIRGKRTQQPPMIDLSEPAFFHIRGRRAVEQPPYLDLTPSYFHIRGKRTEYPPFLELGQPSYFHIRGRRAEKTTKD	1
HIRamide	NVEC200_013206_1.1	GE	QPPYLDLTPAYFHIR	GKR	MRLYLFVPVFALVLAVEGASDEKRDSKQPPIDLSPAAYFHIRGKRTHNAPPLDLSGPAYFHIRGKRTAKQPPYLDLGEPSFFHIRGKRTEGPPYIDLTEPSFFHIRGKRSSEQPPLDLGPAYFHIRGKRTKNPPIDLGPAYFHIRGKRLSGEQPPYLDLTPAYFHIRGKRTQQPPMIDLSEPAFFHIRGRRAVEQPPYLDLTPSYFHIRGKRTEYPPFLELGQPSYFHIRGRRAEKTTKD	1
HIRamide	NVEC200_013206_1.1	GE	QPPYLDLTPAYFHIRG	KR	MRLYLFVPVFALVLAVEGASDEKRDSKQPPIDLSPAAYFHIRGKRTHNAPPLDLSGPAYFHIRGKRTAKQPPYLDLGEPSFFHIRGKRTEGPPYIDLTEPSFFHIRGKRSSEQPPLDLGPAYFHIRGKRTKNPPIDLGPAYFHIRGKRLSGEQPPYLDLTPAYFHIRGKRTQQPPMIDLSEPAFFHIRGRRAVEQPPYLDLTPSYFHIRGKRTEYPPFLELGQPSYFHIRGRRAEKTTKD	1
HIRamide	NVEC200_013206_1.1	VE	QPPYLDLTPSYFHIR	GKR	MRLYLFVPVFALVLAVEGASDEKRDSKQPPIDLSPAAYFHIRGKRTHNAPPLDLSGPAYFHIRGKRTAKQPPYLDLGEPSFFHIRGKRTEGPPYIDLTEPSFFHIRGKRSSEQPPLDLGPAYFHIRGKRTKNPPIDLGPAYFHIRGKRLSGEQPPYLDLTPAYFHIRGKRTQQPPMIDLSEPAFFHIRGRRAVEQPPYLDLTPSYFHIRGKRTEYPPFLELGQPSYFHIRGRRAEKTTKD	1
HIRamide	NVEC200_013206_1.1	LG	QPSYFHIR	GRR	MRLYLFVPVFALVLAVEGASDEKRDSKQPPIDLSPAAYFHIRGKRTHNAPPLDLSGPAYFHIRGKRTAKQPPYLDLGEPSFFHIRGKRTEGPPYIDLTEPSFFHIRGKRSSEQPPLDLGPAYFHIRGKRTKNPPIDLGPAYFHIRGKRLSGEQPPYLDLTPAYFHIRGKRTQQPPMIDLSEPAFFHIRGRRAVEQPPYLDLTPSYFHIRGKRTEYPPFLELGQPSYFHIRGRRAEKTTKD	1
HIRamide	NVEC200_013206_1.1	RT	QQPPMIDLSEPAFFHIR	GRR	MRLYLFVPVFALVLAVEGASDEKRDSKQPPIDLSPAAYFHIRGKRTHNAPPLDLSGPAYFHIRGKRTAKQPPYLDLGEPSFFHIRGKRTEGPPYIDLTEPSFFHIRGKRSSEQPPLDLGPAYFHIRGKRTKNPPIDLGPAYFHIRGKRLSGEQPPYLDLTPAYFHIRGKRTQQPPMIDLSEPAFFHIRGRRAVEQPPYLDLTPSYFHIRGKRTEYPPFLELGQPSYFHIRGRRAEKTTKD	1
HIRamide	NVEC200_013206_1.1	DL	SEPAFFHIR	GRR	MRLYLFVPVFALVLAVEGASDEKRDSKQPPIDLSPAAYFHIRGKRTHNAPPLDLSGPAYFHIRGKRTAKQPPYLDLGEPSFFHIRGKRTEGPPYIDLTEPSFFHIRGKRSSEQPPLDLGPAYFHIRGKRTKNPPIDLGPAYFHIRGKRLSGEQPPYLDLTPAYFHIRGKRTQQPPMIDLSEPAFFHIRGRRAVEQPPYLDLTPSYFHIRGKRTEYPPFLELGQPSYFHIRGRRAEKTTKD	1
HIRamide	NVEC200_013206_1.1	DL	TEPSFFHIR	GKR	MRLYLFVPVFALVLAVEGASDEKRDSKQPPIDLSPAAYFHIRGKRTHNAPPLDLSGPAYFHIRGKRTAKQPPYLDLGEPSFFHIRGKRTEGPPYIDLTEPSFFHIRGKRSSEQPPLDLGPAYFHIRGKRTKNPPIDLGPAYFHIRGKRLSGEQPPYLDLTPAYFHIRGKRTQQPPMIDLSEPAFFHIRGRRAVEQPPYLDLTPSYFHIRGKRTEYPPFLELGQPSYFHIRGRRAEKTTKD	1
HIRamide	NVEC200_013206_1.1	TE	YPPFLELGQPSYFHIR	GRR	MRLYLFVPVFALVLAVEGASDEKRDSKQPPIDLSPAAYFHIRGKRTHNAPPLDLSGPAYFHIRGKRTAKQPPYLDLGEPSFFHIRGKRTEGPPYIDLTEPSFFHIRGKRSSEQPPLDLGPAYFHIRGKRTKNPPIDLGPAYFHIRGKRLSGEQPPYLDLTPAYFHIRGKRTQQPPMIDLSEPAFFHIRGRRAVEQPPYLDLTPSYFHIRGKRTEYPPFLELGQPSYFHIRGRRAEKTTKD	1

## Sheet: Uncertain
Precursor name	PROPEPTIDE	N-TERM_FLANK	PEPTIDE_SEQUENCE	C-TERM_FLANK	REASON_FOR_UNCERTAINTY	PROPEPTIDE_SEQUENCE	Format
FLRNa2	HADP01211238.1	YA	QQRANPGYDRF	RR	Medium fragmentation	MKRSLVVVLVVAIAAAMFVETEGFLRNGREQIPSKLERDAAELEDFYNALYAQQRANPGYDRFRRERKANA	0
FLRNa2	HADP01211238.1	AQ	QRANPGYDRF	RR	Medium fragmentation	MKRSLVVVLVVAIAAAMFVETEGFLRNGREQIPSKLERDAAELEDFYNALYAQQRANPGYDRFRRERKANA	0
LRWa3	HADP01262889.1	YT	QESSAGPPQGLRW	GKR	Overlap with predicted signal peptide	MASKTLLVCLLVTFMVLSIYTQESSAGPPQGLRWGKRWENPSEKQVRENAEREVQDFKDYFKKKYNRDLDI	1
LRWa1b	NVE11178|HADP01056499.1	KL	VPMMKEYI	RR	Medium fragmentation	MESKRLLVILVVCFALVAFAPSTEAQGLRWGREYDESPEKLVPMMKEYIRRQEELKKKREFSMN	0
VRHa	NVE12742	EC	YRITDPGDLEKPQENDEPGPPMIKIPVRH	GKR	Intermediate peptide?	MKITPVMSCLVLASALLVTAECYRITDPGDLEKPQENDEPGPPMIKIPVRHGKREFNDDLEGKLGSHACG	1
FFKAa	NVE12918|HADO01001257.1	RR	QFNEGSVAEEEARKEFLRALLRSAE	RR	Medium fragmentation	MNRLALVLLCMFLTAVLMPNRVQGFFKAGRELKEKSADSNERRQFNEGSVAEEEARKEFLRALLRSAERRSKTDDYQ	0
IPIa	NVE1473	KK	GRVVHKGKNPPQPPFRIPI	GRK	Intermediate peptide?	MESFVLLAVLTYSLVSCTLVTPQSSKEEVATRWSKDKYDYLPLIPHGESSDESDAFLENILRNDKTTYREKKGRVVHKGKNPPQPPFRIPIGRKRSNRVVIHTGANPTMAPFRIPGGRKRSNRVVIHTGANPTMAPFRIPIGRKRSNRVVIHTGANPTMAPLRIPFGRKRSNGVVVHTNPDLSDLDGDTPNVNIERAQKEEC	1
HIRa	NVE15069	KR	TAKQPPYLDLGEPSFFHIR	GKR	Intermediate peptide?	MRLYLFVPVFALVLAVEGASDEKRDSKQPPIDLSPAAYFHIRGKRTHNAPPLDLSGPAYFHIRGKRTAKQPPYLDLGEPSFFHIRGKRTEGPPYIDLTEPSFFHIRGKRSSEQPPLDLGPAYFHIRGKRTKNPPIDLGPAYFHIRGKRLSGEQPPYLDLTPAYFHIRGKRTQQPPMIDLSEPAFFHIRGRRAVEQPPYLDLTPSYFHIRGREE	0
HIRa	NVE15069	KR	LSGEQPPYLDLTPAYFHIR	GKR	Intermediate peptide?		0
HIRa	NVE15069	RR	AVEQPPYLDLTPSYFHIR	GRE	Intermediate peptide?	MRLYLFVPVFALVLAVEGASDEKRDSKQPPIDLSPAAYFHIRGKRTHNAPPLDLSGPAYFHIRGKRTAKQPPYLDLGEPSFFHIRGKRTEGPPYIDLTEPSFFHIRGKRSSEQPPLDLGPAYFHIRGKRTKNPPIDLGPAYFHIRGKRLSGEQPPYLDLTPAYFHIRGKRTQQPPMIDLSEPAFFHIRGRRAVEQPPYLDLTPSYFHIRGREE	0
HIRa	NVE15069	KR	DSKQPPIDLSPAAYFHIR	GKR	Intermediate peptide?	MRLYLFVPVFALVLAVEGASDEKRDSKQPPIDLSPAAYFHIRGKRTHNAPPLDLSGPAYFHIRGKRTAKQPPYLDLGEPSFFHIRGKRTEGPPYIDLTEPSFFHIRGKRSSEQPPLDLGPAYFHIRGKRTKNPPIDLGPAYFHIRGKRLSGEQPPYLDLTPAYFHIRGKRTQQPPMIDLSEPAFFHIRGRRAVEQPPYLDLTPSYFHIRGREE	0
HIRa	NVE15069	DS	KQPPIDLSPAAYFHIR	GKR	Intermediate peptide?	MRLYLFVPVFALVLAVEGASDEKRDSKQPPIDLSPAAYFHIRGKRTHNAPPLDLSGPAYFHIRGKRTAKQPPYLDLGEPSFFHIRGKRTEGPPYIDLTEPSFFHIRGKRSSEQPPLDLGPAYFHIRGKRTKNPPIDLGPAYFHIRGKRLSGEQPPYLDLTPAYFHIRGKRTQQPPMIDLSEPAFFHIRGRRAVEQPPYLDLTPSYFHIRGREE	0
HIRa	NVE15069	TA	KQPPYLDLGEPSFFHIR	GKR	Intermediate peptide?	MRLYLFVPVFALVLAVEGASDEKRDSKQPPIDLSPAAYFHIRGKRTHNAPPLDLSGPAYFHIRGKRTAKQPPYLDLGEPSFFHIRGKRTEGPPYIDLTEPSFFHIRGKRSSEQPPLDLGPAYFHIRGKRTKNPPIDLGPAYFHIRGKRLSGEQPPYLDLTPAYFHIRGKRTQQPPMIDLSEPAFFHIRGRRAVEQPPYLDLTPSYFHIRGREE	0
HIRa	NVE15069	KR	SSEQPPLDLGPAYFHIR	GKR	Intermediate peptide?	MRLYLFVPVFALVLAVEGASDEKRDSKQPPIDLSPAAYFHIRGKRTHNAPPLDLSGPAYFHIRGKRTAKQPPYLDLGEPSFFHIRGKRTEGPPYIDLTEPSFFHIRGKRSSEQPPLDLGPAYFHIRGKRTKNPPIDLGPAYFHIRGKRLSGEQPPYLDLTPAYFHIRGKRTQQPPMIDLSEPAFFHIRGRRAVEQPPYLDLTPSYFHIRGREE	0
HIRa	NVE15069	KR	TEGPPYIDLTEPSFFHIR	GKR	Intermediate peptide?	MRLYLFVPVFALVLAVEGASDEKRDSKQPPIDLSPAAYFHIRGKRTHNAPPLDLSGPAYFHIRGKRTAKQPPYLDLGEPSFFHIRGKRTEGPPYIDLTEPSFFHIRGKRSSEQPPLDLGPAYFHIRGKRTKNPPIDLGPAYFHIRGKRLSGEQPPYLDLTPAYFHIRGKRTQQPPMIDLSEPAFFHIRGRRAVEQPPYLDLTPSYFHIRGREE	0
HIRa	NVE15069	KR	THNAPPLDLSGPAYFHIR	GKR	Intermediate peptide?	MRLYLFVPVFALVLAVEGASDEKRDSKQPPIDLSPAAYFHIRGKRTHNAPPLDLSGPAYFHIRGKRTAKQPPYLDLGEPSFFHIRGKRTEGPPYIDLTEPSFFHIRGKRSSEQPPLDLGPAYFHIRGKRTKNPPIDLGPAYFHIRGKRLSGEQPPYLDLTPAYFHIRGKRTQQPPMIDLSEPAFFHIRGRRAVEQPPYLDLTPSYFHIRGREE	0
HIRa	NVE15069	KR	TKNPPIDLGPAYFHIR	GKR	Intermediate peptide?	MRLYLFVPVFALVLAVEGASDEKRDSKQPPIDLSPAAYFHIRGKRTHNAPPLDLSGPAYFHIRGKRTAKQPPYLDLGEPSFFHIRGKRTEGPPYIDLTEPSFFHIRGKRSSEQPPLDLGPAYFHIRGKRTKNPPIDLGPAYFHIRGKRLSGEQPPYLDLTPAYFHIRGKRTQQPPMIDLSEPAFFHIRGRRAVEQPPYLDLTPSYFHIRGREE	0
HIRa	NVE15069	KR	TQQPPMIDLSEPAFFHIR	GRR	Intermediate peptide?	MRLYLFVPVFALVLAVEGASDEKRDSKQPPIDLSPAAYFHIRGKRTHNAPPLDLSGPAYFHIRGKRTAKQPPYLDLGEPSFFHIRGKRTEGPPYIDLTEPSFFHIRGKRSSEQPPLDLGPAYFHIRGKRTKNPPIDLGPAYFHIRGKRLSGEQPPYLDLTPAYFHIRGKRTQQPPMIDLSEPAFFHIRGRRAVEQPPYLDLTPSYFHIRGREE	0
CCa	NVE15666	SS	LRVKADNNPSDDDALSRFF	RR	Overlap with predicted signal peptide	MTAKLCLPLCIYVFCILHCVSTSSLRVKADNNPSDDDALSRFFRRDCHVGLWCGKKREPAIEQSSRFKSADDCPVGLWCGKKRSASKGESIEISHSNKQREQGEEESTVLQKLTDGNTGPPDEVARRMFRRASTSCPPGLWCGKKRSIPEQNPSGLELQLPYLAGTLPSYEVNDEDAPQSDLKKMFRRASTSCPPGLWCGRKRTVYSNIGIPPRQSSLKSKFERSCPPGLWCGK	1
FLRNa1	NVE17328|HADO01000428.1	KR	AEMGYPPRWEEYENQLYQ	RR	Intermediate peptide?	MASSRTLVAFLAVFVLCGMLIQTSDAFLRNGRDEIYAKKRAEMGYPPRWEEYENQLYQRRDEDAKRSKQ	0
	NVE18122	AE	KPPPTWPLWP	Precursor end	Only peptide on precursor	MPQSMFLVGIFASFVFFSVAKGGSITFPDHRGNTVTVSYEPVGCFADTNRRALRNEYYNYRRKINWNVYPDFSAVINNCARQAYLNGFRTMFAVQFWGECWSDGSAFTRFMKYGPSSNCAHGVGKHWANYVYHMMVTQNSVVQQCTSNGKVYNEGDTMYVPNEWLDVKDAACQKCECNSGKASSCSIGYHCDALLDGACEKYVLEPKQCCPTCACVHNNTEMAEGSTWAFRKDAKCHECTCSRGNGKCSFVGCSCPVGHHQSDSIPEGKCCPECVSDAKSSKEAIALPAEKPPPTWPLWP	1
GLWG	NVE21167	KK	QKTPEECPPGLWGC	KR	Disulphide bridge	MLSLVALVTLALISPELASGSPFSQMRRSLLEEQCLPGVWGCKRGAPAALNEQRRTASEESDEQCLPGVWGCKKRTVIQERQCLPGVWGCKRGFDIPIQAKKKQKTPEECPPGLWGCKRGFLGGYYPETSPDYYQQGMPSEYSEYQQGYPSDYQNLASYYKRRLAIRMRRSVEKEDEQCLPGVWGCKKDKIEAKKSEDQCLPGVWGCKRDKIAKKQAEEQCPPGLWGCKKDNIEIEKTEETKKSEDQCLPGVWGCKKRSVTSN	0
	NVE21426	AP	ARDEDLVYTTIDCPVGIWVCQ	KR	Disulphide bridge	MNSIPVLLVLLGAFAEIVFSAPARDEDLVYTTIDCPVGIWVCQKRRSEIAQPVRREPRVDCPPGVWTCQKKREEAQQEPLAPEAIPENAVESDADNLCPPGVWTCGSSGRKKRQAEMPAPVSTVQEETERSINMCPPGIWVCDRKRELKRQREQRRQAAMEKLDLSAFKKVKKPCPPGIWVC	1
GWA peptide	NVE21658	M	QWGHKGWA	KR	Overlap with predicted signal peptide	MQWGHKGWAKRQAQLNEGWKSVNDDKGWAKPQAQLYEGWKSVDDDKGWAKPQAQIYEGWKSVNDDKGWAKPQAQIYEGWKSVNDDKGWAKRQAQLNEGWKSVNDDKGWAKRQAQLNEGWKSANYDKGWAKRQAQLNEGWKSVNDDKGWAKPHAQLNEGWKSVNDDKGWAKPHAQLNEGWKSVNDDKGWAKPQAQMXXXXXXXXXXXXXXXXXXXXXXXXXXXXXXXXXXXXXXXXXXXXXXALKRYYLLRLIFITFCVEIYYISR	0
	NVE21750	HG	FPPSPPKAPDTVEAVA	KR	Medium fragmentation	MLSSLVILSLLGVTCHGFPPSPPKAPDTVEAVAKRAFCPEGGGDKKAGCTYWRKLGYCEPGKGYFDFMEKTCPASCGLCQPRPTPPPQAALATVNKQECLKAHNTKRALHGARPLTWDNSLARDAGKWSLLLANSNTFKHAPNSDEGENLYYISKVSASPVTCVEAVKAWYDEVVDYPFNNPPESVFQVSGAPIGHFTQIVWKDTRRLGVAIARIKRGLWYSTYIVARYSPPGNYNGEFTQQVGSIRA	1
PFHamide	NVE22506	KR	RQMPNMVPFH	GKR	Intermediate peptide?	MADIPALIPVPVPYGGSLLKSGSLGLSSDDLHTALYTGLVGFKTRYFTTVAMETCTPLTSVVYHTSEKDGLEVTTTNYYGIVLEEREPEIFKLPEYCTDTRKRRQMPNMVPFHGKRQMPNMVPFHGKRQMPNMVPFHGKRQMPNMVPFHGKRQMPNQVPYLG	0
LRWa3	NVE2302	YT	QESSAGPPQGLRW	GKR	Overlap with predicted signal peptide	MASKTLLVCLLVTFMVLSIYTQESSAGPPQGLRWGKRWENPSEKQVRENAEREVQDFKDYFKKKYN	1
	NVE23858	IE	GPIPPVPLI	KR	Medium fragmentation	MKIIAIFIFVLVFVGLSLQLDEEFLNDEYNDDDSEFTNSWAVELDSDDEELAKEVARKHGFKYAGRIGELPGHFHLYRDEHDGEDSKRGGIVYPELKEHPNVKWHEQQRTLSLHKRSLSVKRVVPNFYNDPMLQDQWYLKSFGRNGVPMNNDMKVMDAWADGYTGKGIVVTVMDDGLDHTNDDLKHYDPKASLNLNGATNGDTTGKDPIPRDEPDQYHGTKCAGEIGAKSNNGFCGVGVAPDVNLGAIRMLDGKVTGMTEGHAFSHNPQYVDIYSASWGPKDNGKTLAGPSSLGRKALEHGVKRGRNGKGSLYVWASGNGGASSDDCNCDGYTSSIYTIAVGSVSAAGGSTFYDEKCPSTLAVVYSGDSDLSRTKLGGNHKLVTTGPHNSCVEHFGGTS…	0
	NVE23858	GP	IPPVPLI	KR	Only peptide on precursor	MKIIAIFIFVLVFVGLSLQLDEEFLNDEYNDDDSEFTNSWAVELDSDDEELAKEVARKHGFKYAGRIGELPGHFHLYRDEHDGEDSKRGGIVYPELKEHPNVKWHEQQRTLSLHKRSLSVKRVVPNFYNDPMLQDQWYLKSFGRNGVPMNNDMKVMDAWADGYTGKGIVVTVMDDGLDHTNDDLKHYDPKASLNLNGATNGDTTGKDPIPRDEPDQYHGTKCAGEIGAKSNNGFCGVGVAPDVNLGAIRMLDGKVTGMTEGHAFSHNPQYVDIYSASWGPKDNGKTLAGPSSLGRKALEHGVKRGRNGKGSLYVWASGNGGASSDDCNCDGYTSSIYTIAVGSVSAAGGSTFYDEKCPSTLAVVYSGDSDLSRTKLGGNHKLVTTGPHNSCVEHFGGTS…	0
LRWa3	NVE24308	YT	QESSAGPPQGLRW	GKR	Overlap with predicted signal peptide	MVLSIYTQESSAGPPQGLRWGKRWENPSEKQVRENAEREVQDFKDYFKKKYNRDLDI	1
WFSamide	NVE2973	KR	EFEPKNALQNDNAPPGNGEGEAGFIPWFS	GKR	Intermediate peptide?	MSNYFLHWVTALAFILCSGLANGKIPKVPIKEVENAPPSTGEGEAGFIPWFSGKREFEPKNALKNDNAPPGNGEGEAGFIPWFSGKREFEPKKALKNDNAPPGNGEGEARFIPWFSGKRELIPKIVLQNDNAPPGNGEGEAGFIPWFSGKREFEQKNALQNDNAPPGNGEGEAGFIPWFSGKREFEPKNALQNDNAPPGNGEGEAGFIPWFSGKREQPKQRSKMTWYRQARERESKGLFLGSPGNEQSIDSKK	0
WFSamide	NVE2974	KR	EFNPKNALKNDNAPPGNEEGEAGFIPWFS	GKR	Intermediate peptide?	MSNYFLHWVTALAFILCSGLANGKIPKVPIKEVENAPPSTGEGEAGFIPWFSGKREFNPKNALKNDNAPPGNEEGEAGFIPWFSGKRELIPKIVLQNDNAPPGNGEGEAGFIPWFSGKREFEPKNALQNDNAPPGNGEGEAGFIPWFSGKRDTNQKMHYKMTMHRPAMAKGRLVSFLGFQARGTQPKQRYKMTWYRQARERESKGLFLGSPGNEQSIDSKK	1
WFSamide	NVE2974	NA	PPGNEEGEAGFIPWFS	GKR	Medium fragmentation	MSNYFLHWVTALAFILCSGLANGKIPKVPIKEVENAPPSTGEGEAGFIPWFSGKREFNPKNALKNDNAPPGNEEGEAGFIPWFSGKRELIPKIVLQNDNAPPGNGEGEAGFIPWFSGKREFEPKNALQNDNAPPGNGEGEAGFIPWFSGKRDTNQKMHYKMTMHRPAMAKGRLVSFLGFQARGTQPKQRYKMTWYRQARERESKGLFLGSPGNEQSIDSKK	1
WFSamide	NVE2974	KR	EFEPKNALQNDNAPPGNGEGEAGFIPWFS	GKR	Intermediate peptide?	MSNYFLHWVTALAFILCSGLANGKIPKVPIKEVENAPPSTGEGEAGFIPWFSGKREFNPKNALKNDNAPPGNEEGEAGFIPWFSGKRELIPKIVLQNDNAPPGNGEGEAGFIPWFSGKREFEPKNALQNDNAPPGNGEGEAGFIPWFSGKRDTNQKMHYKMTMHRPAMAKGRLVSFLGFQARGTQPKQRYKMTWYRQARERESKGLFLGSPGNEQSIDSKK	1
	NVE339	KR	GHKTTIADAGPLRIMPIS	Precursor end	Medium fragmentation	MRAVLVCAVLVLCLVAVKANKDEKEASEKVKKEANLRPLSPENHADALKDAIARKSPVLKNFKKEIKNFKLEKKKMWEKIQELKRKLADEKRAEKAMKSLSKDERKIKRKINKGMIKKLLEHKRKLVTRMKNARNAKREHLKRHKNSKRGKLHKKQAKVNQKRNKGHQKRGKDHHKREKSQHKREKHQKKNLNKRNKQNKRGHKTTIADAGPLRIMPIS	0
FRPamide	NVE4012|Nvec_XP_032233649.1	KR	QGLMFRPG	RR	Medium fragmentation	MYSCMGISLLLILCFKGSYGEESIDLEPGVDKVPEKVEHGEEGSAKYNINTVTLTGNKATGNKVTNDDKRPPWPPRPGKRTFRPQESADTPSIFRPGRSVHEDQLLFRPGRANLHKRQGLMFRPGRREDVPKPQIFRPGRREDIPSDDDQLMFRPGRNEEQLFRPGRRSDVGDEQLLFRPGRRSDLEEDQLIFRPGRRSDVAEEQLFRPGRRSDVPEAFLDQWTSVRPGRGGYRMPWTYTGNSVNSHVSQKSHTFRQKAVEQEKKKREV	1
FRPamide	NVE4012|Nvec_XP_032233649.1	SD	VPEAFLDQWTSVRP	GRG	Medium fragmentation	MYSCMGISLLLILCFKGSYGEESIDLEPGVDKVPEKVEHGEEGSAKYNINTVTLTGNKATGNKVTNDDKRPPWPPRPGKRTFRPQESADTPSIFRPGRSVHEDQLLFRPGRANLHKRQGLMFRPGRREDVPKPQIFRPGRREDIPSDDDQLMFRPGRNEEQLFRPGRRSDVGDEQLLFRPGRRSDLEEDQLIFRPGRRSDVAEEQLFRPGRRSDVPEAFLDQWTSVRPGRGGYRMPWTYTGNSVNSHVSQKSHTFRQKAVEQEKKKREV	1
	NVE5329	VP	ARNDDIVYTTIDCPPGIWVC	KK	Disulphide bridge	MNSIPVLLVLLGALTETVLSVPARNDDIVYTTIDCPPGIWVCKKRRSEIAQPVRREPRVDCPPGVWTCQKKREEIAQQAEAASGQTGESDDINLCPPGIWVCDRKRELKRLREQRAKAVPNKPAKRINMCPPGIWVCD	0
	NVE5329	VP	ARNDDIVYTTIDCPPGIWVCK	KR	Disulphide bridge	MNSIPVLLVLLGALTETVLSVPARNDDIVYTTIDCPPGIWVCKKRRSEIAQPVRREPRVDCPPGVWTCQKKREEIAQQAEAASGQTGESDDINLCPPGIWVCDRKRELKRLREQRAKAVPNKPAKRINMCPPGIWVCD	0
	NVE5329	VP	ARNDDIVYTTIDCPPGIWVCKKRRSEIAQPV	RR	Disulphide bridge	MNSIPVLLVLLGALTETVLSVPARNDDIVYTTIDCPPGIWVCKKRRSEIAQPVRREPRVDCPPGVWTCQKKREEIAQQAEAASGQTGESDDINLCPPGIWVCDRKRELKRLREQRAKAVPNKPAKRINMCPPGIWVCD	0
	NVE5329	DD	IVYTTIDCPPGIWVC	KK	Disulphide bridge	MNSIPVLLVLLGALTETVLSVPARNDDIVYTTIDCPPGIWVCKKRRSEIAQPVRREPRVDCPPGVWTCQKKREEIAQQAEAASGQTGESDDINLCPPGIWVCDRKRELKRLREQRAKAVPNKPAKRINMCPPGIWVCD	0
	NVE5329	PA	RNDDIVYTTIDCPPGIWVC	KK	Disulphide bridge	MNSIPVLLVLLGALTETVLSVPARNDDIVYTTIDCPPGIWVCKKRRSEIAQPVRREPRVDCPPGVWTCQKKREEIAQQAEAASGQTGESDDINLCPPGIWVCDRKRELKRLREQRAKAVPNKPAKRINMCPPGIWVCD	0
	NVE5329	PA	RNDDIVYTTIDCPPGIWVCK	KR	Disulphide bridge	MNSIPVLLVLLGALTETVLSVPARNDDIVYTTIDCPPGIWVCKKRRSEIAQPVRREPRVDCPPGVWTCQKKREEIAQQAEAASGQTGESDDINLCPPGIWVCDRKRELKRLREQRAKAVPNKPAKRINMCPPGIWVCD	0
	NVE5454	IM	IPPYGEVDGAEEYF	Precursor end	Medium fragmentation	MIFRLNTAFLLVAFLLLSTASSQRADQKNREDTSSRYCGRFGCIGGKRSEGSRAKNIMIPPYGEVDGAEEYF	1
GWA peptide	NVE6636	TT	QGWEKVDM	KR	Medium fragmentation	MSRLVILLVFCLVLVSLALGQLITEGGEGINAGGACKRANGMACSDTTQGWEKVDMKRQVRISETTDPWVWEPKRQRLAKVGREQKEDEDNNLGGGGWFRRQAMQWGHKGWAKRQAQLNEGWKSVNDDKGWAKPHAQLNEGWKSVNEGTKAGQNDKRN	0
GWA peptide	NVE6636	KR	QVRISETTDPWVWEP	KR	Medium fragmentation	MSRLVILLVFCLVLVSLALGQLITEGGEGINAGGACKRANGMACSDTTQGWEKVDMKRQVRISETTDPWVWEPKRQRLAKVGREQKEDEDNNLGGGGWFRRQAMQWGHKGWAKRQAQLNEGWKSVNDDKGWAKPHAQLNEGWKSVNEGTKAGQNDKRN	0
QGRFamide	NVE7549|Nvec_RFamide	AS	MPEQDANPQTRFD	GKK	Medium fragmentation	MAPRPGTLLLLGILIQVLICTAKSTYKKEIADLLDDNKDTPQFWKGRFSDPQFWKGRFSDPQFWKGRFSDPQFWKGRFSDPQFWKGRFSDPQFWKGRFSDPQFWKGRFSDPQFWKGRFADELLNGGHHKHHHEEGEWKRTAGPGRFGREDQGRFGREDQGRFGREDQGRFGREDQGRFGREDQGRFGREDQGRFGREDQGRFGREDQGRFGREDQGRFGREDQGRFGREDQGRFGREDQGRFGREDQGRFGREDQGRFGREDQGRFGREDQGRFGREDQGRFGREDQGRFGREDQGRFGREDQGRFGREDQGRFGREDQGRFGRNKIARVIDLDQGRFGRTMDTATKKDTVASMPEQDANPQTRFDGKKRQAAKERSIEKKSTISSDAKASDAKQS	1
	NVE8376	CF	ALPFVAVRFQMAKAANS	Precursor end	Medium fragmentation	MASVGRSLVLFGRSATRMRATNNRLLRGVHFDEGPGLNMPFQTQNKTRLLIVMVAYLGTCFALPFVAVRFQMAKAANS	0
	NVE897	AN	QLPKLEPVKE	Precursor end	Medium fragmentation	MPRYSVKQIQPKKSRLALAAEKPAKGPEPREPESASQDKESRDDERADEDGDDSGMASGDDDDDDEENPAIASGMQPKPYPGFGGPMKITPMEPSINDARPTNRKCYFCFPRGKLGRVEITGAGGPYLMNSFMPGGMPPPMMFPSMFYPQCPGGCGPGCCGGCNGCCNNMPFPIIFKMKKEKGASKDKKAEDEPQDDFNPNNEEVKTTTTKQKTRADKKPIPANQLPKLEPVKE	1
	NVE9107	KK	ALAESLGLKLPTDTLTGEKST	Precursor end	Medium fragmentation	MRVSTVLLLFVVTLAVSHAYVLRDPRGGGGEGGGGGGGRGRGGGGGEGGSHDPRGGRGGGGGGGGGGGGRGGDESISRDGGGGHGGGHGYGGGPNGGGGGGGGGGGGGGDEDDSGKNGKEYSGKNKWNNGGEYNNGGKYNKWRGGKGRHSGGGGGGGGGGGGGSYDSNDKELMKLLDNSRQEKNDPPAMETMGSSGPAWGGGASKWATMWMKPKSKSSKATKSPKTSSYPGLPFSPQMPYTGYPQVPASPYTSILTPYGMLPYPVPQAAQTMPQASQDAALGKRTIKGMSGSGGPPPAFPAFWMPYMTAGPPATGIPAAWASLLAAQPPVAASSWPAYASQGASNIKTASQTTGSPIDWAALLQAYAPKQDPALVASPFAGIGAKFSPWPQIEKELNKE…	0
HIRa	Nvec_HIRamide	KR	TAKQPPYLDLGEPSFFHIR	GKR	Intermediate peptide?	MRLYLFVPVFALVLAVEGASDEKRDSKQPPIDLSPAAYFHIRGKRTYNAPPLDLSGPAYFHIRGKRTAKQPPYLDLGEPSFFHIRGKRTEGPPYIDLTEPSFFHIRGKRSSEQPPLDLGPAYFHIRGKRTKNPPIDLGPAYFHIRGKRLSGEQPPYLDLTPAYFHIRGKRTQQPPMIDLSEPAFFHIRGRRAVEQPPYLDLTPSYFHIRGKRTEYPPFLELGQPSYFHIRGRRAEKTTKD	1
HIRa	Nvec_HIRamide	RR	AVEQPPYLDLTPSYFHIR	GKR	Intermediate peptide?	MRLYLFVPVFALVLAVEGASDEKRDSKQPPIDLSPAAYFHIRGKRTYNAPPLDLSGPAYFHIRGKRTAKQPPYLDLGEPSFFHIRGKRTEGPPYIDLTEPSFFHIRGKRSSEQPPLDLGPAYFHIRGKRTKNPPIDLGPAYFHIRGKRLSGEQPPYLDLTPAYFHIRGKRTQQPPMIDLSEPAFFHIRGRRAVEQPPYLDLTPSYFHIRGKRTEYPPFLELGQPSYFHIRGRRAEKTTKD	1
HIRa	Nvec_HIRamide	KR	DSKQPPIDLSPAAYFHIR	GKR	Intermediate peptide?	MRLYLFVPVFALVLAVEGASDEKRDSKQPPIDLSPAAYFHIRGKRTYNAPPLDLSGPAYFHIRGKRTAKQPPYLDLGEPSFFHIRGKRTEGPPYIDLTEPSFFHIRGKRSSEQPPLDLGPAYFHIRGKRTKNPPIDLGPAYFHIRGKRLSGEQPPYLDLTPAYFHIRGKRTQQPPMIDLSEPAFFHIRGRRAVEQPPYLDLTPSYFHIRGKRTEYPPFLELGQPSYFHIRGRRAEKTTKD	1
HIRa	Nvec_HIRamide	DS	KQPPIDLSPAAYFHIR	GKR	Intermediate peptide?	MRLYLFVPVFALVLAVEGASDEKRDSKQPPIDLSPAAYFHIRGKRTYNAPPLDLSGPAYFHIRGKRTAKQPPYLDLGEPSFFHIRGKRTEGPPYIDLTEPSFFHIRGKRSSEQPPLDLGPAYFHIRGKRTKNPPIDLGPAYFHIRGKRLSGEQPPYLDLTPAYFHIRGKRTQQPPMIDLSEPAFFHIRGRRAVEQPPYLDLTPSYFHIRGKRTEYPPFLELGQPSYFHIRGRRAEKTTKD	1
HIRa	Nvec_HIRamide	TA	KQPPYLDLGEPSFFHIR	GKR	Intermediate peptide?	MRLYLFVPVFALVLAVEGASDEKRDSKQPPIDLSPAAYFHIRGKRTYNAPPLDLSGPAYFHIRGKRTAKQPPYLDLGEPSFFHIRGKRTEGPPYIDLTEPSFFHIRGKRSSEQPPLDLGPAYFHIRGKRTKNPPIDLGPAYFHIRGKRLSGEQPPYLDLTPAYFHIRGKRTQQPPMIDLSEPAFFHIRGRRAVEQPPYLDLTPSYFHIRGKRTEYPPFLELGQPSYFHIRGRRAEKTTKD	1
HIRa	Nvec_HIRamide	KR	LSGEQPPYLDLTPAYFHIR	GKR	Intermediate peptide?	MRLYLFVPVFALVLAVEGASDEKRDSKQPPIDLSPAAYFHIRGKRTYNAPPLDLSGPAYFHIRGKRTAKQPPYLDLGEPSFFHIRGKRTEGPPYIDLTEPSFFHIRGKRSSEQPPLDLGPAYFHIRGKRTKNPPIDLGPAYFHIRGKRLSGEQPPYLDLTPAYFHIRGKRTQQPPMIDLSEPAFFHIRGRRAVEQPPYLDLTPSYFHIRGKRTEYPPFLELGQPSYFHIRGRRAEKTTKD	1
HIRa	Nvec_HIRamide	KR	SSEQPPLDLGPAYFHIR	GKR	Intermediate peptide?	MRLYLFVPVFALVLAVEGASDEKRDSKQPPIDLSPAAYFHIRGKRTYNAPPLDLSGPAYFHIRGKRTAKQPPYLDLGEPSFFHIRGKRTEGPPYIDLTEPSFFHIRGKRSSEQPPLDLGPAYFHIRGKRTKNPPIDLGPAYFHIRGKRLSGEQPPYLDLTPAYFHIRGKRTQQPPMIDLSEPAFFHIRGRRAVEQPPYLDLTPSYFHIRGKRTEYPPFLELGQPSYFHIRGRRAEKTTKD	1
HIRa	Nvec_HIRamide	KR	TEGPPYIDLTEPSFFHIR	GKR	Intermediate peptide?	MRLYLFVPVFALVLAVEGASDEKRDSKQPPIDLSPAAYFHIRGKRTYNAPPLDLSGPAYFHIRGKRTAKQPPYLDLGEPSFFHIRGKRTEGPPYIDLTEPSFFHIRGKRSSEQPPLDLGPAYFHIRGKRTKNPPIDLGPAYFHIRGKRLSGEQPPYLDLTPAYFHIRGKRTQQPPMIDLSEPAFFHIRGRRAVEQPPYLDLTPSYFHIRGKRTEYPPFLELGQPSYFHIRGRRAEKTTKD	1
HIRa	Nvec_HIRamide	KR	TEYPPFLELGQPSYFHIR	GRR	Intermediate peptide?	MRLYLFVPVFALVLAVEGASDEKRDSKQPPIDLSPAAYFHIRGKRTYNAPPLDLSGPAYFHIRGKRTAKQPPYLDLGEPSFFHIRGKRTEGPPYIDLTEPSFFHIRGKRSSEQPPLDLGPAYFHIRGKRTKNPPIDLGPAYFHIRGKRLSGEQPPYLDLTPAYFHIRGKRTQQPPMIDLSEPAFFHIRGRRAVEQPPYLDLTPSYFHIRGKRTEYPPFLELGQPSYFHIRGRRAEKTTKD	1
HIRa	Nvec_HIRamide	KR	TKNPPIDLGPAYFHIR	GKR	Intermediate peptide?	MRLYLFVPVFALVLAVEGASDEKRDSKQPPIDLSPAAYFHIRGKRTYNAPPLDLSGPAYFHIRGKRTAKQPPYLDLGEPSFFHIRGKRTEGPPYIDLTEPSFFHIRGKRSSEQPPLDLGPAYFHIRGKRTKNPPIDLGPAYFHIRGKRLSGEQPPYLDLTPAYFHIRGKRTQQPPMIDLSEPAFFHIRGRRAVEQPPYLDLTPSYFHIRGKRTEYPPFLELGQPSYFHIRGRRAEKTTKD	1
HIRa	Nvec_HIRamide	KR	TQQPPMIDLSEPAFFHIR	GRR	Intermediate peptide?	MRLYLFVPVFALVLAVEGASDEKRDSKQPPIDLSPAAYFHIRGKRTYNAPPLDLSGPAYFHIRGKRTAKQPPYLDLGEPSFFHIRGKRTEGPPYIDLTEPSFFHIRGKRSSEQPPLDLGPAYFHIRGKRTKNPPIDLGPAYFHIRGKRLSGEQPPYLDLTPAYFHIRGKRTQQPPMIDLSEPAFFHIRGRRAVEQPPYLDLTPSYFHIRGKRTEYPPFLELGQPSYFHIRGRRAEKTTKD	1
VRHa	NVEC200_002800_1.1|Nvec_VRHamide	KR	ELFNAGGPPPIYLPVRP	GKR	Medium fragmentation	MKITPVMSCLVLASALLVTAECYRITDPGDLEKPQENDEPGPPMIKIPVRHGKREFNDDLEDTTLLHYPFRVARKRELFNAGGPPPIYLPVRPGKRGYYRDNIQETRQYLDPRPGKRSRNH	0
VRHa	NVEC200_002800_1.1|Nvec_VRHamide	EC	YRITDPGDLEKPQENDEPGPPMIKIPVRH	GKR	Intermediate peptide?	MKITPVMSCLVLASALLVTAECYRITDPGDLEKPQENDEPGPPMIKIPVRHGKREFNDDLEDTTLLHYPFRVARKRELFNAGGPPPIYLPVRPGKRGYYRDNIQETRQYLDPRPGKRSRNH	0
	NVEC200_004815_1.1	HG	FPPSPPKAPDTVEAVA	KR	Medium fragmentation	MLSSLVILSLLGVTCHGFPPSPPKAPDTVEAVAKRAFCPEGGGDKKAGCTYWRKLGYCEPGKGYFDFMEKTCPASCGLCQPRPTPPPQAALATVNKQECLKAHNTKRALHGARPLTWDNSLARDAGKWALVLANSNTFKHAPNSDEGENLYYISKVSARPVTCVEAVKAWYDEVVDYPFNNPPESVFQVSGAPIGHFTQIVWKDTRRLGVAIARIKRGLWYSTYIVARYSPPGNYNGEFTQQVGSIRA	1
WFSamide	NVEC200_005035_1.1	KR	DTTKAAVQNDLVPPSKGAGEQGFIPWFS	GKR	Intermediate peptide?	YLIALDARHYPRLYLEMSNYFLHWVTALAFILCSGLANGKIPKVPIKEVENAPPSTGEGEAGFIPWFSGKREFEPKNALKNDNAPPGNGEGEAGFIPWFSGKREFEPKKALKNDNAPPGNEEGEARFIPWFSGKRELIPKIVLQNDNAPPGNGEGEAGFIPWFSGKREFEQKNALQNDNAPPGNGEGEAGFIPWFSGKREFEPKNALQNDNAPPGNGEGEAGFIPWFSGKRDTTKAAVQNDLVPPSKGAGEQGFIPWFSGKRTVNRLKEINTENDADANKAPPSGHNEAGFIPWFAGKRKV	0
WFSamide	NVEC200_005035_1.1	KR	EFEPKNALQNDNAPPGNGEGEAGFIPWFS	GKR	Intermediate peptide?	YLIALDARHYPRLYLEMSNYFLHWVTALAFILCSGLANGKIPKVPIKEVENAPPSTGEGEAGFIPWFSGKREFEPKNALKNDNAPPGNGEGEAGFIPWFSGKREFEPKKALKNDNAPPGNEEGEARFIPWFSGKRELIPKIVLQNDNAPPGNGEGEAGFIPWFSGKREFEQKNALQNDNAPPGNGEGEAGFIPWFSGKREFEPKNALQNDNAPPGNGEGEAGFIPWFSGKRDTTKAAVQNDLVPPSKGAGEQGFIPWFSGKRTVNRLKEINTENDADANKAPPSGHNEAGFIPWFAGKRKV	0
GWA peptide	NVEC200_010517_1.1	TT	QGWEKVDM	KR	Medium fragmentation	TSFRAVEQGITMSRLVILLVFCLVLVSLALGQLITEGGEGINAGGACKRANGMACSDTTQGWEKVDMKRQVRISETTDPWVWEPKRQRLAKVGREQKEDEDNNLGGGGWFRRQAMQWGHKGWAKRQAQLNEGWKSVNDDKGWAKRQAQLNEGWKSVNDDKGWAKPQAQMNEGWKSVNDDKGWAKPHAQLNEGWKSVNDDKGWAKPQAQLNEGWKSANYDKGWAKRQAKLNKGWESANYDKGWAKRQAQLNDGWMHRQAAWRDEGKDKSGDKDLRFWGVAGRH	1
GWA peptide	NVEC200_010517_1.1	KR	QVRISETTDPWVWEP	KR	Medium fragmentation	TSFRAVEQGITMSRLVILLVFCLVLVSLALGQLITEGGEGINAGGACKRANGMACSDTTQGWEKVDMKRQVRISETTDPWVWEPKRQRLAKVGREQKEDEDNNLGGGGWFRRQAMQWGHKGWAKRQAQLNEGWKSVNDDKGWAKRQAQLNEGWKSVNDDKGWAKPQAQMNEGWKSVNDDKGWAKPHAQLNEGWKSVNDDKGWAKPQAQLNEGWKSANYDKGWAKRQAKLNKGWESANYDKGWAKRQAQLNDGWMHRQAAWRDEGKDKSGDKDLRFWGVAGRH	1
	NVEC200_012385_1.1	VP	QDTSLASSDKLS	RK	Medium fragmentation	NWPSIGHAKTINSRTLHLLFNTKRMLSVKLCIVLCVFVIVFEESRAVPQDTSLASSDKLSRKNAGAPCVGKDCEERRGIRAKWYRRCPKGALCSRTTRKEKSEHRRQNKKSFQSRENDEAPSKFAACKPDLMCKKKSDLPRRIAIRLGYRDAQDIPECPDAFWCKRRQKSQRRSFSCPPGLWCKRLAEDSTVCHEGFNCKRSVSAERLRAAGYSDSAKGCPPGLWCKRAVHAFKLNCPPGLWCKRESEDDQRPDRRENGIEQKSVKKGIEVDQRPDRQDSGVYQRLEGDENKPSSDCPPGLWCKRNNEVPRRSDKRVDRISDCPPGLWCKRGLTRNLAAVLGFKRSDSIANCPPGLWCKRSEKSLDVDCPLGYKCKRQISDDQGDLTAEYPGYETSRTM…	0
HIRa	NVEC200_013206_1.1	KR	TAKQPPYLDLGEPSFFHIR	GKR	Intermediate peptide?	MRLYLFVPVFALVLAVEGASDEKRDSKQPPIDLSPAAYFHIRGKRTHNAPPLDLSGPAYFHIRGKRTAKQPPYLDLGEPSFFHIRGKRTEGPPYIDLTEPSFFHIRGKRSSEQPPLDLGPAYFHIRGKRTKNPPIDLGPAYFHIRGKRLSGEQPPYLDLTPAYFHIRGKRTQQPPMIDLSEPAFFHIRGRRAVEQPPYLDLTPSYFHIRGKRTEYPPFLELGQPSYFHIRGRRAEKTTKD	1
HIRa	NVEC200_013206_1.1	RR	AVEQPPYLDLTPSYFHIR	GKR	Intermediate peptide?	MRLYLFVPVFALVLAVEGASDEKRDSKQPPIDLSPAAYFHIRGKRTHNAPPLDLSGPAYFHIRGKRTAKQPPYLDLGEPSFFHIRGKRTEGPPYIDLTEPSFFHIRGKRSSEQPPLDLGPAYFHIRGKRTKNPPIDLGPAYFHIRGKRLSGEQPPYLDLTPAYFHIRGKRTQQPPMIDLSEPAFFHIRGRRAVEQPPYLDLTPSYFHIRGKRTEYPPFLELGQPSYFHIRGRRAEKTTKD	1
HIRa	NVEC200_013206_1.1	KR	DSKQPPIDLSPAAYFHIR	GKR	Intermediate peptide?	MRLYLFVPVFALVLAVEGASDEKRDSKQPPIDLSPAAYFHIRGKRTHNAPPLDLSGPAYFHIRGKRTAKQPPYLDLGEPSFFHIRGKRTEGPPYIDLTEPSFFHIRGKRSSEQPPLDLGPAYFHIRGKRTKNPPIDLGPAYFHIRGKRLSGEQPPYLDLTPAYFHIRGKRTQQPPMIDLSEPAFFHIRGRRAVEQPPYLDLTPSYFHIRGKRTEYPPFLELGQPSYFHIRGRRAEKTTKD	1
HIRa	NVEC200_013206_1.1	DS	KQPPIDLSPAAYFHIR	GKR	Intermediate peptide?	MRLYLFVPVFALVLAVEGASDEKRDSKQPPIDLSPAAYFHIRGKRTHNAPPLDLSGPAYFHIRGKRTAKQPPYLDLGEPSFFHIRGKRTEGPPYIDLTEPSFFHIRGKRSSEQPPLDLGPAYFHIRGKRTKNPPIDLGPAYFHIRGKRLSGEQPPYLDLTPAYFHIRGKRTQQPPMIDLSEPAFFHIRGRRAVEQPPYLDLTPSYFHIRGKRTEYPPFLELGQPSYFHIRGRRAEKTTKD	1
HIRa	NVEC200_013206_1.1	TA	KQPPYLDLGEPSFFHIR	GKR	Intermediate peptide?	MRLYLFVPVFALVLAVEGASDEKRDSKQPPIDLSPAAYFHIRGKRTHNAPPLDLSGPAYFHIRGKRTAKQPPYLDLGEPSFFHIRGKRTEGPPYIDLTEPSFFHIRGKRSSEQPPLDLGPAYFHIRGKRTKNPPIDLGPAYFHIRGKRLSGEQPPYLDLTPAYFHIRGKRTQQPPMIDLSEPAFFHIRGRRAVEQPPYLDLTPSYFHIRGKRTEYPPFLELGQPSYFHIRGRRAEKTTKD	1
HIRa	NVEC200_013206_1.1	KR	LSGEQPPYLDLTPAYFHIR	GKR	Intermediate peptide?	MRLYLFVPVFALVLAVEGASDEKRDSKQPPIDLSPAAYFHIRGKRTHNAPPLDLSGPAYFHIRGKRTAKQPPYLDLGEPSFFHIRGKRTEGPPYIDLTEPSFFHIRGKRSSEQPPLDLGPAYFHIRGKRTKNPPIDLGPAYFHIRGKRLSGEQPPYLDLTPAYFHIRGKRTQQPPMIDLSEPAFFHIRGRRAVEQPPYLDLTPSYFHIRGKRTEYPPFLELGQPSYFHIRGRRAEKTTKD	1
HIRa	NVEC200_013206_1.1	KR	SSEQPPLDLGPAYFHIR	GKR	Intermediate peptide?	MRLYLFVPVFALVLAVEGASDEKRDSKQPPIDLSPAAYFHIRGKRTHNAPPLDLSGPAYFHIRGKRTAKQPPYLDLGEPSFFHIRGKRTEGPPYIDLTEPSFFHIRGKRSSEQPPLDLGPAYFHIRGKRTKNPPIDLGPAYFHIRGKRLSGEQPPYLDLTPAYFHIRGKRTQQPPMIDLSEPAFFHIRGRRAVEQPPYLDLTPSYFHIRGKRTEYPPFLELGQPSYFHIRGRRAEKTTKD	1
HIRa	NVEC200_013206_1.1	KR	TEGPPYIDLTEPSFFHIR	GKR	Intermediate peptide?	MRLYLFVPVFALVLAVEGASDEKRDSKQPPIDLSPAAYFHIRGKRTHNAPPLDLSGPAYFHIRGKRTAKQPPYLDLGEPSFFHIRGKRTEGPPYIDLTEPSFFHIRGKRSSEQPPLDLGPAYFHIRGKRTKNPPIDLGPAYFHIRGKRLSGEQPPYLDLTPAYFHIRGKRTQQPPMIDLSEPAFFHIRGRRAVEQPPYLDLTPSYFHIRGKRTEYPPFLELGQPSYFHIRGRRAEKTTKD	1
HIRa	NVEC200_013206_1.1	KR	TEYPPFLELGQPSYFHIR	GRR	Intermediate peptide?	MRLYLFVPVFALVLAVEGASDEKRDSKQPPIDLSPAAYFHIRGKRTHNAPPLDLSGPAYFHIRGKRTAKQPPYLDLGEPSFFHIRGKRTEGPPYIDLTEPSFFHIRGKRSSEQPPLDLGPAYFHIRGKRTKNPPIDLGPAYFHIRGKRLSGEQPPYLDLTPAYFHIRGKRTQQPPMIDLSEPAFFHIRGRRAVEQPPYLDLTPSYFHIRGKRTEYPPFLELGQPSYFHIRGRRAEKTTKD	1
HIRa	NVEC200_013206_1.1	KR	THNAPPLDLSGPAYFHIR	GKR	Intermediate peptide?	MRLYLFVPVFALVLAVEGASDEKRDSKQPPIDLSPAAYFHIRGKRTHNAPPLDLSGPAYFHIRGKRTAKQPPYLDLGEPSFFHIRGKRTEGPPYIDLTEPSFFHIRGKRSSEQPPLDLGPAYFHIRGKRTKNPPIDLGPAYFHIRGKRLSGEQPPYLDLTPAYFHIRGKRTQQPPMIDLSEPAFFHIRGRRAVEQPPYLDLTPSYFHIRGKRTEYPPFLELGQPSYFHIRGRRAEKTTKD	1
HIRa	NVEC200_013206_1.1	KR	TKNPPIDLGPAYFHIR	GKR	Intermediate peptide?	MRLYLFVPVFALVLAVEGASDEKRDSKQPPIDLSPAAYFHIRGKRTHNAPPLDLSGPAYFHIRGKRTAKQPPYLDLGEPSFFHIRGKRTEGPPYIDLTEPSFFHIRGKRSSEQPPLDLGPAYFHIRGKRTKNPPIDLGPAYFHIRGKRLSGEQPPYLDLTPAYFHIRGKRTQQPPMIDLSEPAFFHIRGRRAVEQPPYLDLTPSYFHIRGKRTEYPPFLELGQPSYFHIRGRRAEKTTKD	1
HIRa	NVEC200_013206_1.1	KR	TQQPPMIDLSEPAFFHIR	GRR	Intermediate peptide?	MRLYLFVPVFALVLAVEGASDEKRDSKQPPIDLSPAAYFHIRGKRTHNAPPLDLSGPAYFHIRGKRTAKQPPYLDLGEPSFFHIRGKRTEGPPYIDLTEPSFFHIRGKRSSEQPPLDLGPAYFHIRGKRTKNPPIDLGPAYFHIRGKRLSGEQPPYLDLTPAYFHIRGKRTQQPPMIDLSEPAFFHIRGRRAVEQPPYLDLTPSYFHIRGKRTEYPPFLELGQPSYFHIRGRRAEKTTKD	1
	NVEC200_013996_1.1	KR	CKADDIDCLQQLTF	Precursor end	Disulphide bridge	TEGGNLLNKTQPIHEGKGVQGMACLALVAVLILSISTHPAYGQQTSQDGMFPCPAGQKEDGTCHNAWRVGRSEEKKPVLRVYRRQTNCDPQHVPLCRLTLGKRSVDEEEAQDTRPRSVCERSVGRDRLRCALHLTLRRLGSRATESGNIVCRKRSGECVYTDGNQGNAEQTSRRGIGQGQMPYENQMLSCEETPQSPFCYGIGKKRHGSKNETPFKRGTSYQKTKKENQPSPMTRDFKEHLTLTNTGSGSISLGVVPEVLIPEVSPEDELTGGGGEPGKCDPNNLFCRFRVPGDEIPKRCKADDIDCLQQLTF	0
QGRFamide	NVEC200_014078_1.1	AS	MPEQDANPQTRFD	GKK	Medium fragmentation	MAPRPGTLLLLGILIQVLICTAKSTYKKEIADLLDDNKDTPQFWKGRFSDPQFWKGRFSDPQFWKGRFSDPQFWKGRFSDPQFWKGRFSDPQFWKGRFSDPQFWKGRFSDPQFWKGRFADELLNGGHHKHHHEEGEWKRTAGPGRFGREDQGRFGREDQGRFGREDQGRFGREDQGRFGREDQGRFGREDQGRFGREDQGRFGREDQGRFGREDQGRFGREDQGRFGREDQGRFGREDQGRFGREDQGRFGREDQGRFGREDQGRFGREDQGRFGREDQGRFGREDQGRFGREDQGRFGREDQGRFGREDQGRFGREDQGRFGREDQGRFGREDQGRFGRNKIARVIDLDQGRFGRTMDTATKKDTVASMPEQDANPQTRFDGKKRQAAKERSIEKKST…	1
	NVEC200_014828_1.1	AN	QLPKLEPVKE	Precursor end	Medium fragmentation	MRTVVLVVFFACLGLALAAEKPAKGPEPREPESASQDKESRDDERADEDGDDSGMASGDDDDDDEENPAIASGMQPKPYPGFGGPMKITPMEPSINDARPTNRKCYFCFPRGKLGRVEITGAGGPYLMNSFMPGGMPPPMMFPSMFYPQCPGGCGPGCCGGCNGCCNNMPFPIIFKMKKEKGASKDKKAEDEPQDDFNPNNEEVKTTTTKQKTRADKKPIPANQLPKLEPVKE	0

## Sheet: Poor
PROPEPTIDE	N-TERM_FLANK	PEPTIDE_SEQUENCE	C-TERM_FLANK	PROPEPTIDE_SEQUENCE
HADP01262889.1	SA	GPPQGLRWG	KR	MASKTLLVCLLVTFMVLSIYTQESSAGPPQGLRWGKRWENPSEKQVRENAEREVQDFKDYFKKKYNRDLDI
HADP01262889.1	KR	WENPSEKQVRENAEREVQDFKDYFKKKYN	RD	MASKTLLVCLLVTFMVLSIYTQESSAGPPQGLRWGKRWENPSEKQVRENAEREVQDFKDYFKKKYNRDLDI
HADP01262889.1	KR	WENPSEKQVRENAEREVQDFKDYFKKKYNRDLDI	Precursor end	MASKTLLVCLLVTFMVLSIYTQESSAGPPQGLRWGKRWENPSEKQVRENAEREVQDFKDYFKKKYNRDLDI
NVE10634	AF	VAGVTTPGFNKISGDE	KR	MVGTKLFLGLLIVAVCLKAGSAFVAGVTTPGFNKISGDEKRSLEESRIWRMCESTRRFCNAARAHIQHEQQEPKYR
NVE11072	NA	QLVDKTTQDLQRDSSSNA	RR	MANVLLVCALFVLAVNAQLVDKTTQDLQRDSSSNARRTVAEYIRELLQLSNEQGYEKIRPSIRDELTEKARENEAFNKFISSLIKDKQQSEEESQQSDARTPQGDVLADIRRGMSDSEQKRGRCRPGIWYCPKRDAERLQEKRRLSAQKSAAPRRCRPGLWYCPQDEGEETKRSSVRLQRLDNAQSTDKESDLRKLALTKIDGDDDWFTKMMETTRRR
NVE11178|HADP01056499.1	YD	ESPEKLVPMMKEYIRRQEEL	KK	MESKRLLVILVVCFALVAFAPSTEAQGLRWGREYDESPEKLVPMMKEYIRRQEELKKKREFSMN
NVE11178|HADP01056499.1	EA	QGLRWGREYDESPEKLVPMMKEYIRRQEEL	KK	MESKRLLVILVVCFALVAFAPSTEAQGLRWGREYDESPEKLVPMMKEYIRRQEELKKKREFSMN
NVE11178|HADP01056499.1	EA	QGLRWGREYDESPEKLVPMMKEYIRRQEELKKKREFSMN	Precursor end	MESKRLLVILVVCFALVAFAPSTEAQGLRWGREYDESPEKLVPMMKEYIRRQEELKKKREFSMN
NVE11178|HADP01056499.1	KL	VPMMKEYIRRQEEL	KK	MESKRLLVILVVCFALVAFAPSTEAQGLRWGREYDESPEKLVPMMKEYIRRQEELKKKREFSMN
NVE11271	RR	TILGSVSDYVLHHAHVPTIIIPKK	Precursor end	MASEEPKKVRRILLPIDSSKHSEDAFEWYVNNMHHEEDELILVHVLDSAAIQTRVSSHGLVDDEFKNEMNKGLKEVKALEEKYKTKAETASLKAKIEVRGGKPGETICQCSKDEHCDLILMGSRGLGSIRRTILGSVSDYVLHHAHVPTIIIPKK
NVE11386	NG	YRLESLRNLPNDALEEESEVAEKSPL	KK	MDVKLVAILFACTLFSLSFANGYRLESLRNLPNDALEEESEVAEKSPLKKRGCSDAFPVVCRSPSVKAACYNPNHRSHAFITDVCKHTCHLC
NVE12327	LP	KQKGSYKNMNHADFLKGLDRASS	KR	MDTRVIAVLFVAIMVLSSTNALPKQKGSYKNMNHADFLKGLDRASSKRDCRDSHWSCFFQSNYEDICSTAQAEECALSCGLC
NVE12327	PK	QKGSYKNMNHADFLKGLDRASS	KR	MDTRVIAVLFVAIMVLSSTNALPKQKGSYKNMNHADFLKGLDRASSKRDCRDSHWSCFFQSNYEDICSTAQAEECALSCGLC
NVE12742	YR	ITDPGDLEKPQENDEPGPPMIKIPVRH	GKR	MKITPVMSCLVLASALLVTAECYRITDPGDLEKPQENDEPGPPMIKIPVRHGKREFNDDLEGKLGSHACG
NVE12918|HADO01001257.1	RR	QFNEGSVAEEEARKEFLRALLRSAERRSKTDDYQ	Precursor end	MNRLALVLLCMFLTAVLMPNRVQGFFKAGRELKEKSADSNERRQFNEGSVAEEEARKEFLRALLRSAERRSKTDDYQ
NVE13034	AE	KPPPTWPLWP	Precursor end	MCTRLTKGGSITFPDHRGNTVTVSYEPVGCFADTNRRALRNEYYNYRRKINWNVYPDFSAVINNCARQAYLNGFRTMFAVQFWGECWSDGSAFTRFMKYGPSSNCAHGVGKHWANYVYHMMVTQNSVVQQCTSNGEVYNEGDTMYVPNEWLDVKDAACQKCECNSGKASSCSIGYHCDALLDGACEKYVLKPKQCCPTCACVHNNTEMAEGSTWAFRKDAKCHECTCSRGNGKCSFVGCSCPVGHHQSDSIPEGKCCPECVSDAKSSKEAIALPAEKPPPTWPLWP
NVE13213	KR	QTKEQVICEGPAKLALESYHIDLSKSHLCGENS	KR	MNKISALLFLGCVVAITWAFPREETIAHLVNYRARLMASEGPENETRIEDAEELESKSSYLSKREKLEEITGFAKMKKPYSSRREKLEEMRAFDRKRQTKEQVICEGPAKLALESYHIDLSKSHLCGENSKRWANDFKSFLRKRELEYHMSSNYRRNMNACCSPDCDWLLQYLEVDSQVIKCVDKK
NVE13213	KR	WANDFKSFL	RK	MNKISALLFLGCVVAITWAFPREETIAHLVNYRARLMASEGPENETRIEDAEELESKSSYLSKREKLEEITGFAKMKKPYSSRREKLEEMRAFDRKRQTKEQVICEGPAKLALESYHIDLSKSHLCGENSKRWANDFKSFLRKRELEYHMSSNYRRNMNACCSPDCDWLLQYLEVDSQVIKCVDKK
NVE13685	DE	MMQNPEMQGEPPAATEVEDEDALAAYERMKEAIPEQK	Precursor end	MRSLLVLFCACLLVAAVFADLPAEQAENAESLDMSFEDEMMQNPEMQGEPPAATEVEDEDALAAYERMKEAIPEQK
NVE15069	EG	ASDEKRDSKQPPIDLSPAAYFHIR	GKR	MRLYLFVPVFALVLAVEGASDEKRDSKQPPIDLSPAAYFHIRGKRTHNAPPLDLSGPAYFHIRGKRTAKQPPYLDLGEPSFFHIRGKRTEGPPYIDLTEPSFFHIRGKRSSEQPPLDLGPAYFHIRGKRTKNPPIDLGPAYFHIRGKRLSGEQPPYLDLTPAYFHIRGKRTQQPPMIDLSEPAFFHIRGRRAVEQPPYLDLTPSYFHIRGREE
NVE15069	AV	EQPPYLDLTPSYFHIR	GRE	MRLYLFVPVFALVLAVEGASDEKRDSKQPPIDLSPAAYFHIRGKRTHNAPPLDLSGPAYFHIRGKRTAKQPPYLDLGEPSFFHIRGKRTEGPPYIDLTEPSFFHIRGKRSSEQPPLDLGPAYFHIRGKRTKNPPIDLGPAYFHIRGKRLSGEQPPYLDLTPAYFHIRGKRTQQPPMIDLSEPAFFHIRGRRAVEQPPYLDLTPSYFHIRGREE
NVE15069	LS	GPAYFHIR	GKR	MRLYLFVPVFALVLAVEGASDEKRDSKQPPIDLSPAAYFHIRGKRTHNAPPLDLSGPAYFHIRGKRTAKQPPYLDLGEPSFFHIRGKRTEGPPYIDLTEPSFFHIRGKRSSEQPPLDLGPAYFHIRGKRTKNPPIDLGPAYFHIRGKRLSGEQPPYLDLTPAYFHIRGKRTQQPPMIDLSEPAFFHIRGRRAVEQPPYLDLTPSYFHIRGREE
NVE15069	RT	KNPPIDLGPAYFHIR	GKR	MRLYLFVPVFALVLAVEGASDEKRDSKQPPIDLSPAAYFHIRGKRTHNAPPLDLSGPAYFHIRGKRTAKQPPYLDLGEPSFFHIRGKRTEGPPYIDLTEPSFFHIRGKRSSEQPPLDLGPAYFHIRGKRTKNPPIDLGPAYFHIRGKRLSGEQPPYLDLTPAYFHIRGKRTQQPPMIDLSEPAFFHIRGRRAVEQPPYLDLTPSYFHIRGREE
NVE15069	TK	NPPIDLGPAYFHIRG	KR	MRLYLFVPVFALVLAVEGASDEKRDSKQPPIDLSPAAYFHIRGKRTHNAPPLDLSGPAYFHIRGKRTAKQPPYLDLGEPSFFHIRGKRTEGPPYIDLTEPSFFHIRGKRSSEQPPLDLGPAYFHIRGKRTKNPPIDLGPAYFHIRGKRLSGEQPPYLDLTPAYFHIRGKRTQQPPMIDLSEPAFFHIRGRRAVEQPPYLDLTPSYFHIRGREE
NVE15069	KR	SSEQPPLDLGPAYFHIRGKRTKNPPIDLGPAYFHIR	GKR	MRLYLFVPVFALVLAVEGASDEKRDSKQPPIDLSPAAYFHIRGKRTHNAPPLDLSGPAYFHIRGKRTAKQPPYLDLGEPSFFHIRGKRTEGPPYIDLTEPSFFHIRGKRSSEQPPLDLGPAYFHIRGKRTKNPPIDLGPAYFHIRGKRLSGEQPPYLDLTPAYFHIRGKRTQQPPMIDLSEPAFFHIRGRRAVEQPPYLDLTPSYFHIRGREE
NVE15078	SL	VMGFASPAIVYLSPWTKDSIKAMQAIPNSYPYPQLQDADKE	Precursor end	MSPSFLARTTNWFKMAWVEQPIIFVSLVMGFASPAIVYLSPWTKDSIKAMQAIPNSYPYPQLQDADKE
NVE15078	IF	VSLVMGFASPAIVYLSPWTKDSIKAMQAIPNSYPYPQLQDADKE	Precursor end	MSPSFLARTTNWFKMAWVEQPIIFVSLVMGFASPAIVYLSPWTKDSIKAMQAIPNSYPYPQLQDADKE
NVE15340	GH	ISPSSEEQWKRAKKGESIRPSDEQLPSIGGGLDPSFGSSHHEF	RR	MKPKLLIVCAVLAVLSGGVHSRALNGKFSQGVDASSISPSPAVQVPTPFGIDPTPTVKYPQATRTAEVPSQLDGNVIADKPTDRFQHGDNHVNPNDVDKSFHRRDVEELPDWIDDESSGEYFPSSDASILSENLATDEGYDSEYDEESSTHLPRMDMDQPDTVLPDYSSADDVDGSTAQDDDQSVEDDQFQEGDQFLDDVQPLDDDQSLEDEQFPEEDQSLNNDQFLEENQEDGTDDEGFDSGDEEDSLTSEEEEADEQPATSLPTIITELVNKYVYGGDNNVDEFSEEQATSFPTRITEMFSEYLNLGRKTDSSNAGKEDLGQEEETIPFPTRVANLVNKYLKSGVETEDRPTRVTEIMNSLYRGRNKPDSSNNDHKRAPATAFPTRVKELLNEYLYS…
NVE15340	GG	LDPSFGSSHHEF	RK	MKPKLLIVCAVLAVLSGGVHSRALNGKFSQGVDASSISPSPAVQVPTPFGIDPTPTVKYPQATRTAEVPSQLDGNVIADKPTDRFQHGDNHVNPNDVDKSFHRRDVEELPDWIDDESSGEYFPSSDASILSENLATDEGYDSEYDEESSTHLPRMDMDQPDTVLPDYSSADDVDGSTAQDDDQSVEDDQFQEGDQFLDDVQPLDDDQSLEDEQFPEEDQSLNNDQFLEENQEDGTDDEGFDSGDEEDSLTSEEEEADEQPATSLPTIITELVNKYVYGGDNNVDEFSEEQATSFPTRITEMFSEYLNLGRKTDSSNAGKEDLGQEEETIPFPTRVANLVNKYLKSGVETEDRPTRVTEIMNSLYRGRNKPDSSNNDHKRAPATAFPTRVKELLNEYLYS…
NVE15505	EE	KPPKNWYW	KR	MWTYGLVGFLFFFVALQAVQINGFEKGYCKVSLPQYVTPACSIKRKAGLHKQQKEFKLNAPSAAMPYARLAVSTKGYPKFVKDKPMLSSHLTEYATMVAAGRKFKELYKNMTKGKPEEMTYRDFLELNKYMRTALEKAFGHKMRLPSEYEPFQMDVTKYLSDKYFTEQRLAGANPLGLQQVTLSDEVGLSFSNLKKNLNPNFNWKKAVGEALGRRINNNEKLKEVIEEGLLFALRYPLADDMVFMKDIVDDHANRTLWPFYSPIALFASVEEKPPKNWYWKRWGWKGSHTLKPVAIQMDYKPAVAQAISRVAPGPGVVVSGNLASAETSCKKPQKPHSKQIQDSE
NVE15529	EN	DPMEELLSGVEPMNEEDKAWLAKFDAATKSSA	KR	MKVLIVLLLCVCTALAAPQTDSLIDELDKLIHHEETENDPMEELLSGVEPMNEEDKAWLAKFDAATKSSAKRGANFGRCIDGRTLADGPNGIGCAKKLCYDARVSACKGISKRICYSAYRRFREECPFSCSFCKSRSPEQGCEAAYGSRARYGCCADGFPALRPGKTDCRCEDANAHVCKQFIPKEGGCRTGSYRLRTFFQSRCLKSCGFC
NVE15666	KR	SIPEQNPSGLELQLPYLAGTLPSYEVNDEDAPQSDLKKMF	RR	MTAKLCLPLCIYVFCILHCVSTSSLRVKADNNPSDDDALSRFFRRDCHVGLWCGKKREPAIEQSSRFKSADDCPVGLWCGKKRSASKGESIEISHSNKQREQGEEESTVLQKLTDGNTGPPDEVARRMFRRASTSCPPGLWCGKKRSIPEQNPSGLELQLPYLAGTLPSYEVNDEDAPQSDLKKMFRRASTSCPPGLWCGRKRTVYSNIGIPPRQSSLKSKFERSCPPGLWCGK
NVE15677	EE	LGILTPEELGLAK	Precursor end	MYSLALRRLATPLAVRSTSALGVTVRNMSSNKPVESEEAFDARWEAYFSRPDIDAWELRRGLNELYGHDLVPEPKIINAMFHACRRLNDYGTTVRILEAVKDKAAGNKEIYPYILQQCKPVMEELGILTPEELGLAK
NVE16146	VF	SPPVHPNPPYPVQ	Precursor end	MAYPGAVAPPPYSETVASPGMSTPYNNTVPATQVEISVSCRNLADMDVFSKSDPMVVMFTQGMGTKEWREFGRTEVIMNNLNPDFVKKFTIHYFFEEIQKLRFQVYDIDKKSSRLQDHDFIGEIECTLGSIVGENGGQLEKALLNKQQSKPRGKIILRCEEVSQCKDVATLQFRGHKLDKKDFFGKSDPFLVFYRCNEDNSFTAVHRTEVVKNTLNPTWKPFSVPARALCNGDIDRSIRIECYDWDRDGSHDLIGIFSTTLRELTSNPNLTFELKNPKKQAKKKSYKNSGTIILLQSKLEQQPTFLDFIKGGTQISFIVAIDFTASNGNPQNSNSLHFLNPYEPNQYVKALTSVGAICQDYDSDKLFPAFGFGARLPPNWEVSHEFALNGNPQNPFCER…
NVE16210	DN	GKPEPEEKPEVTSLPGARGEGDGEEPQFQMDI	Precursor end	MNGTQAERGSPLARAIPSRRVPVHDPNHMPSDYSTTPGGTIYSTTPGGTRIIYERKFLLELRNSPLAKSPPANLPVIPGVTCEDNGKPEPEEKPEVTSLPGARGEGDGEEPQFQMDI
NVE16210	VT	SLPGARGEGDGEEPQFQMDI	Precursor end	MNGTQAERGSPLARAIPSRRVPVHDPNHMPSDYSTTPGGTIYSTTPGGTRIIYERKFLLELRNSPLAKSPPANLPVIPGVTCEDNGKPEPEEKPEVTSLPGARGEGDGEEPQFQMDI
NVE17328|HADO01000428.1	KR	AEMGYPPRWEEYENQLYQRRDEDA	KR	MASSRTLVAFLAVFVLCGMLIQTSDAFLRNGRDEIYAKKRAEMGYPPRWEEYENQLYQRRDEDAKRSKQ
NVE17329	GA	QGGLHREPEKEEEDALL	KR	MATNKSTLVILTVVLTLCLITQSAHGFFREGRNLEARRDNNRLGLREARYYGAQGGLHREPEKEEEDALLKRFRGYRR
NVE18016	LL	QIDLAKKDQIKVHGF	Precursor end	MSIQNLQVYNPFEDASKGDGESNTSVQRDVIHVRIQQRNGRKTLTTIQGISDEYDKKKLVKAFKKQFACNGTVVDHPEYGECIQLQGDQRAHAQEFLLQIDLAKKDQIKVHGF
NVE1820	GF	AGDDAPRAVFPSIV	GRP	MADDDIAALVIDNGSGMCKAGFAGDDAPRAVFPSIVGRPRHQGVMVGMGQKDSYVGDEAQSKRGILTLKYPIEHGIVTNWDDMEKIWHHTFYNELRVAPEEHPVLLTEAPLNPKANREKMTQIMFETFNSPAMYVAIQAVLSLYASGRTTGIVMDSGDGVSHTVPIYEGYALPHAILRLDLAGRDLTDYLMKILTERGYSFTTTAEREIPGEKFAQLFTDGLKPVTDPSGNGGERLAERRHNGRDRRRYGQPDSGDGKAVLFEDGFDALS
NVE18646	KR	LDSLKRLKAKARPQMYRYQEVTNT	Precursor end	MKSTTLSILLGLFVVAAMTLPDVNAWTGIIGASAPSGEEEGGNRLAHLFYKRLDSLKRLKAKARPQMYRYQEVTNT
NVE18847	QF	APPQSIPATGFNFGS	Precursor end	MRRRRNEVSVQLRKSKRDENVLKRRNITDVDSTSPLKEHNNQHSVPIQILPLPVVVGNLQSGDDNLMFTSVQSVRKMLSKEKSPPIDDVINAGLIPMLVKLLDRFDLPLLQFEAAWALTNIASGTSEQTKAVQEGGAVPMFVKLLSSVHDNVAEQAVWALGNIAGDGPLMRNTVIACGALGPLLALIKPSTSIQFLRNVTWTLSNLCRNKNPPPDVTAVQQVLPAIARLILSDDKEVLADTCWALSYLTDGVNERIQLVLDSGVVPKLVELLGYPEVNVLTPALRAIGNIVTGRDDQTQAVIDTGALFYFRALLTHKKSNIIKEAAWAISNVTAGTAQQIQAVMDSGLVPLIVDILRRGDFKARKEAIWVITNYCSGANPDQVKYLLHCDVIPPLCEQL…
NVE19082	KK	TEKNIDQGPNPEINYKHVKDFFKSQQASSIVDVPKAV	KR	MERNTLRFLCLFAFLIFHNVQLTKAISEECAHECNFDEVCYAGVCVKGYLKDTYDYYGDRLRSNEEYNQKNGYDKGYLDRRNDIPKRVYENREANVDSSEPTLEDRTLIKSLPLKDIYNDYRSELGARRGSTREKSQLPPLSSENWDSIRDEVSEGGDHEEKESSLLPPESDFPKASLSEDGLRKNVMPEVHPDSTLMGNGDEHGDMDNPNGKVMIKGIVKKTEKNIDQGPNPEINYKHVKDFFKSQQASSIVDVPKAVKREEDAKLFNTKFVTVTQGKTDEVDKEEDVSGKDRGTVKISLDKKVTGQDISAQMKDNSYTQESGKQVAKRLNEDGSVKDEVSKRMNVRIISADGEVPEKHDSQAEPKKVTNVQPKYFLVTVTVVGCVTGVILAAVAIYL…
NVE19548	PR	QEEFEKEPTQDFAALQRI	Precursor end	MAKLLALAVALMTLQLTVSLPRQGSYLSNMYCCAKGQCPCSLAFGEDYGPDVQFLRGLKANKQELELPRQEEFEKEPTQDFAALQRI
NVE20161	HM	ATPTAEELGLKGWEVYFNAWTTAGRRNIVVATYGILFGGYFLYKSRKAKPASTAQ	Precursor end	MIFPALRAVRVRGPALVRHMATPTAEELGLKGWEVYFNAWTTAGRRNIVVATYGILFGGYFLYKSRKAKPASTAQ
NVE20303	GF	AGDDAPRAVFPSIV	GRP	MEDDEIAALVVDNGSGMCKAGFAGDDAPRAVFPSIVGRPRHQGVMVGMGQKDSYVGDEAQSKRGILTLKYPIEHGIVTNWDDMEKIWHHTFYNELRVAPEEHPVLLTEAPLNPKANREKMTQIMFETFNSPAMYVAIQAVLSLYASGRTTGIVMDSGDGVTHTVPIYEGYALPHAIIRSRGWLLQKEFNIVLGLRLR
NVE20305	GF	AGDDAPRAVFPSIV	GRP	MDDDVAALVIDNGSGMCKAGFAGDDAPRAVFPSIVGRPRHQGVMVGMGQKDSYVGDEAQSKRGILTLKYPIEHGIVTNWDDMEKIWHHTFYNELRVAPEEHPVLLTEAPLNPKANREKMTQIMFETFNSPAMYVAIQAVLSLYASGRTTGIVMDSGDGVTHTVPIYEGNANSSIQL
NVE21004	NL	VLDDAVENVSGNEKHAIGMVVIRGNSIVTMEALDRVL	Precursor end	MVKLNGGRHVSGVLRGYDPFMNLVLDDAVENVSGNEKHAIGMVVIRGNSIVTMEALDRVL
NVE21426	AR	DEDLVYTTIDCPVGIWVCQ	KR	MNSIPVLLVLLGAFAEIVFSAPARDEDLVYTTIDCPVGIWVCQKRRSEIAQPVRREPRVDCPPGVWTCQKKREEAQQEPLAPEAIPENAVESDADNLCPPGVWTCGSSGRKKRQAEMPAPVSTVQEETERSINMCPPGIWVCDRKRELKRQREQRRQAAMEKLDLSAFKKVKKPCPPGIWVC
NVE21426	DE	DLVYTTIDCPVGIWVCQ	KR	MNSIPVLLVLLGAFAEIVFSAPARDEDLVYTTIDCPVGIWVCQKRRSEIAQPVRREPRVDCPPGVWTCQKKREEAQQEPLAPEAIPENAVESDADNLCPPGVWTCGSSGRKKRQAEMPAPVSTVQEETERSINMCPPGIWVCDRKRELKRQREQRRQAAMEKLDLSAFKKVKKPCPPGIWVC
NVE21426	RR	QAAMEKLDLSAF	KK	MNSIPVLLVLLGAFAEIVFSAPARDEDLVYTTIDCPVGIWVCQKRRSEIAQPVRREPRVDCPPGVWTCQKKREEAQQEPLAPEAIPENAVESDADNLCPPGVWTCGSSGRKKRQAEMPAPVSTVQEETERSINMCPPGIWVCDRKRELKRQREQRRQAAMEKLDLSAFKKVKKPCPPGIWVC
NVE21658	KR	QAQLNEGWKSANYDKGWA	KR	MQWGHKGWAKRQAQLNEGWKSVNDDKGWAKPQAQLYEGWKSVDDDKGWAKPQAQIYEGWKSVNDDKGWAKPQAQIYEGWKSVNDDKGWAKRQAQLNEGWKSVNDDKGWAKRQAQLNEGWKSANYDKGWAKRQAQLNEGWKSVNDDKGWAKPHAQLNEGWKSVNDDKGWAKPHAQLNEGWKSVNDDKGWAKPQAQMXXXXXXXXXXXXXXXXXXXXXXXXXXXXXXXXXXXXXXXXXXXXXXALKRYYLLRLIFITFCVEIYYISR
NVE21713	VA	MPSAQLAKM	KR	MAMLNMLVISLTLVAVCVAMPSAQLAKMKRSVCSSADLSDCNDWAASGYCHSESFFHDFMMSYCQAACEICEAPTPPPPPPSNVAVVSSECLGAHNNKRALHQNTPNLSWNADMATEAAAYALKLAQTQNFVHSDTSDGENLYNKGTTSGTVSTCQDAVDSWYSEIDNYDYTDYTNHPGGVIGHFTQIVWKSTTEVGVGVAKAIVGGWTKTYIVARYRTAGNAIGQSHYDENVKPLS
NVE21970	LF	PEVYQDIQRDRRKGIKQEEIQPGNMKVWSDPFKKD	Precursor end	MFPIAIYPKLFPEVYQDIQRDRRKGIKQEEIQPGNMKVWSDPFKKD
NVE22000	EE	MIDGIEAAGKNIKL	GR	MTDQDVEDEVRSRPVKEEDKQVDTKQKRSPWFFRRPKPTTQPPPPKAPKPGETFIEEMIDGIEAAGKNIKLGR
NVE22351	LR	DNIQGITKPAI	RR	MSGRGKGGKGLGKGGAKRHRKILRDNIQGITKPAIRRLARRGGVKRISGLIYEETRGVLKVFLENVIRDAELH
NVE22353	LR	DNIQGITKPAI	RR	MSGRGKGGKGLGKGGAKRHRKILRDNIQGITKPAIRRLARRGGVKRISGLIYEETRGVLKVFLENVIRDAVTYTEHAKRKTVTAMDVVYALNATSLPRVQNKTQTVLLGTTTYDKSHVPMHR
NVE22972	RE	APDLALLEKITRELGKNKN	Precursor end	MLKFLKGKSSKHEGKEDEEKHKAKKSSKDEKKHKKDKKKEKAASMGSLDGAGATTETRKIKKEKRKQKAASMASLDGSGPTIEKKKWRFGKKKTYEIGEAGGVTSVTKTTETRTETRPGGKTVTTTEVRTTRTRSDQRHPGVLLVQADKHDERAGRITDRNQEVDISGNRETSKIHVQKENGKRMENGKEFREDARIRSSNEEELISPEDKIESLQGETGPRNKVVTPGGKVVLIVTRKTSSGGKPAAVSDGKNVDRGNKMDPPKNVSPQMEKDIVKEEVNVQNAERSVDLPSWLEEVKEGDKPKDKMDGTVDIAFDVQGRNKPSLHSEPAVVETVKEEQVENSPEIDWSQLEDPQRRNTFTKTIITKRVKVDLPGNARQEDIPDGSTPQKWLVDVEKS…
NVE2302	SA	GPPQGLRWG	KR	MASKTLLVCLLVTFMVLSIYTQESSAGPPQGLRWGKRWENPSEKQVRENAEREVQDFKDYFKKKYN
NVE2302	KR	WENPSEKQVRENAEREVQDFKDYFKKKYN	Precursor end	MASKTLLVCLLVTFMVLSIYTQESSAGPPQGLRWGKRWENPSEKQVRENAEREVQDFKDYFKKKYN
NVE23327	VA	MPSAQLAKM	KR	MAMLNMLVISLTLVAVCVAMPSAQLAKMKRSVCPSADVSGCNDWAASGYCHSGSIYYDFMMSKCQAACGICEAPPPPPPPPPSNVAVVSSECLGAHNNKRALHQNTPNLSWNADMATEAAAYALKLAQTQNFVHSDTSDGENLYNKGTTSGTVSTCQDAVDSWYSEIDNYDYTDYTNHPGGVIGHFTQIVWKSTTEVGVGVAKAIVDGWTKTYIVARYRTAGNVKGQSHYDENVKPLS
NVE23858	KR	NAAGFLVSNKFGFGLLNAHKLTTNALKW	KR	MKIIAIFIFVLVFVGLSLQLDEEFLNDEYNDDDSEFTNSWAVELDSDDEELAKEVARKHGFKYAGRIGELPGHFHLYRDEHDGEDSKRGGIVYPELKEHPNVKWHEQQRTLSLHKRSLSVKRVVPNFYNDPMLQDQWYLKSFGRNGVPMNNDMKVMDAWADGYTGKGIVVTVMDDGLDHTNDDLKHYDPKASLNLNGATNGDTTGKDPIPRDEPDQYHGTKCAGEIGAKSNNGFCGVGVAPDVNLGAIRMLDGKVTGMTEGHAFSHNPQYVDIYSASWGPKDNGKTLAGPSSLGRKALEHGVKRGRNGKGSLYVWASGNGGASSDDCNCDGYTSSIYTIAVGSVSAAGGSTFYDEKCPSTLAVVYSGDSDLSRTKLGGNHKLVTTGPHNSCVEHFGGTS…
NVE24230	LR	DNIQGITKPAI	RR	MSGRGKGKAKGTKSKTRSSRAGLQFPVGRIHRHLRKGNYAERVGAGAPVYLAAVLEYLSAEILELAGNAARDNKKTRIIPRHLQLARHRKILRDNIQGITKPAIRRLARRXGVKRISGLIYEETRGVLKVFLENVIRDAVTYTEHAKRKTVTAMDVVYALKRQGRTLYGFGG
NVE24290	KR	QILGSHTLYEELTPFNDIHPRVPIVENLQKKSTIPGVPSSLQRDIS	KR	MPAETEDPLDDQKGSKVFTDTSDKRNGIETPIQALQSPNTPAIADQTLRSEVNTPSTGSTSKSVVNTPNGETSAATQTSNAETVQPKTVDVTGVKRGEVTTGTEGSGGSSTPTKGEAVAKVLGGNVSKGNSSSTAKPDASPSSVTISGNTINGKPMLGQGGPIKDQLGNSGAEVMTSHKFYQDEDYSQRSKTEEEESREPEVGHFQVDDKSADLEINANSAGVKVKAKPASLQVVSRPGAHPPVPVVPIAPLYRRHHRHHHHWMDAYRRGMAYHHRHHHRDPYHAYYRAWIPPPAPMYGRYPDFPRYDDDDDAPFYRRSGFEPYPYPFHHHRHHHHHQRYPEDLEERSQMEYPYDYPRFRFREPYRRHFIPSFQEMMARYMIPRMQPYMRENIITPEPP…
NVE24290	KR	QLLNYIPMSPLITGRYNIPLAHKTSEGSGSVGEIKRI	RR	MPAETEDPLDDQKGSKVFTDTSDKRNGIETPIQALQSPNTPAIADQTLRSEVNTPSTGSTSKSVVNTPNGETSAATQTSNAETVQPKTVDVTGVKRGEVTTGTEGSGGSSTPTKGEAVAKVLGGNVSKGNSSSTAKPDASPSSVTISGNTINGKPMLGQGGPIKDQLGNSGAEVMTSHKFYQDEDYSQRSKTEEEESREPEVGHFQVDDKSADLEINANSAGVKVKAKPASLQVVSRPGAHPPVPVVPIAPLYRRHHRHHHHWMDAYRRGMAYHHRHHHRDPYHAYYRAWIPPPAPMYGRYPDFPRYDDDDDAPFYRRSGFEPYPYPFHHHRHHHHHQRYPEDLEERSQMEYPYDYPRFRFREPYRRHFIPSFQEMMARYMIPRMQPYMRENIITPEPP…
NVE24305|HADP01189706.1	EF	QQWKDAHYPSREE	RR	MDAKKVLLIAVISCVLLSVCIEQTTAQGGLRWGREFENEFQQWKDAHYPSREERRSFQKKRSFKMA
NVE24308	SA	GPPQGLRWG	KR	MVLSIYTQESSAGPPQGLRWGKRWENPSEKQVRENAEREVQDFKDYFKKKYNRDLDI
NVE24308	KR	WENPSEKQVRENAEREVQDFKDYFKKKYN	RD	MVLSIYTQESSAGPPQGLRWGKRWENPSEKQVRENAEREVQDFKDYFKKKYNRDLDI
NVE24308	KR	WENPSEKQVRENAEREVQDFKDYFKKKYNRDLDI	Precursor end	MVLSIYTQESSAGPPQGLRWGKRWENPSEKQVRENAEREVQDFKDYFKKKYNRDLDI
NVE24582	EE	KPPKNWYW	KR	MWTYGLVGFLFFFVALQTVQINGFEKGYCKVSLPQYVTPACSIKRKAGLYKQQKEFKLNAPSAAMPYARLAVSTREYPKFVKDKPMLSSHLTEYAAMVAAGRKFQELYKDMTKGRPEEMTYRDFLELNKYMRTALEKAFGHKMRLPSEYEPFQMDVTKYLSDKYFTEQRLAGANPLGLQQVTLSDEVGLSFSNLKKNLNPNFNWKKAVGEALGRRINNNEKLKEVIEKGLLFALRYPLADDMVFMKDIVDDHANRTLWPFYSPIALFASVEEKPPKNWYWKRWGWKGSHTLKPVAIQMDYKPDSAVFTPKDGGKWTLAKLNVQVTDGGYSQMVDHLSHAHLVAEAVCVSMERHLSHKHPLYQMLKFHCRGVLTANVLGAPALLAPGQFMHTLYAYGWKG…
NVE24610	ID	LEMKRVFVTSTLSSDELLATIKKAGKEASYIGPA	Precursor end	MTCKGCSGAVERVLKKVPDVANIEIDLEMKRVFVTSTLSSDELLATIKKAGKEASYIGPA
NVE2470	LR	DNIQGITKPAI	RR	MSGRGKGGKGLGKGGAKRHRKILRDNIQGITKPAIRRLARRGGVKRISGLIYEETRGVLKVFLENVIRDAVTYTEHAKRKTVTAMDVVYALKRQGRTLYGFGG
NVE24721	KR	EDSLGDLEYFRRRLGLES	Precursor end	MTYLLSAAILLIVTIPCLSQAAEGECRNFCYTQYKLCKNSMACVSMSSCGGCTRSFVFCNNECRKRYAKMESKREDSLGDLEYFRRRLGLES
NVE24857	LR	DNIQGITKPAI	RR	MSGRGKGGKGLGKGGAKRHRKILRDNIQGITKPAIRRLARRGGVKRISGLIYEKTRGVLKVFLENIIRDAVTYTEHAKRKTVTAMDVVYALKRQGRTLYGFGG
NVE2870	GF	AGDDAPRAVFPSIV	GRP	MADDDIAALVIDNGSGMCKAGFAGDDAPRAVFPSIVGRPRHQGVMVGMGQKDSYVGDEAQSKRGILTLKYPIEHGIVTNWDDMEKIWHHTFYNELRVAPEEHPVLLTEAPLNPKANREKMTQIMFETFNSPAMYVAIQAVLSLYASGRTTGIVMDSGDGVSHTVPIYEGYALPHAILRLDLAGRDLTDYLMKILTERGYSFTTTAEREIVRDIKEKLCYVALDFEQEMQTAASSSSIEKSYELPDGQVITIGNERFRCPEALLQPSFLGMESSGIHETTYNSIMKCDVDIRKDLYANTVMSGGTTMYPGLADRMQKEISALAPSTMKIKIIAPPERKYSVWIGGSILASLSTFQQMWISKQEYDESGPAIVHRKCF
NVE2880	LR	DNIQGITKPAI	RR	MSGRGKGGKGLGKGGAKRHRKILRDNIQGITKPAIRRLARRGGVKRISGLIYEETRGLLKVFLENVIRDAVTYTEHAKRKTVTAMDVVYVLKRQGRTLYGFGG
NVE2973	KR	EFEPKNALKNDNAPPGNGEGEAGFIPWFS	GKR	MSNYFLHWVTALAFILCSGLANGKIPKVPIKEVENAPPSTGEGEAGFIPWFSGKREFEPKNALKNDNAPPGNGEGEAGFIPWFSGKREFEPKKALKNDNAPPGNGEGEARFIPWFSGKRELIPKIVLQNDNAPPGNGEGEAGFIPWFSGKREFEQKNALQNDNAPPGNGEGEAGFIPWFSGKREFEPKNALQNDNAPPGNGEGEAGFIPWFSGKREQPKQRSKMTWYRQARERESKGLFLGSPGNEQSIDSKK
NVE2973	KR	ELIPKIVLQNDNAPPGNGEGEAGFIPWFS	GKR	MSNYFLHWVTALAFILCSGLANGKIPKVPIKEVENAPPSTGEGEAGFIPWFSGKREFEPKNALKNDNAPPGNGEGEAGFIPWFSGKREFEPKKALKNDNAPPGNGEGEARFIPWFSGKRELIPKIVLQNDNAPPGNGEGEAGFIPWFSGKREFEQKNALQNDNAPPGNGEGEAGFIPWFSGKREFEPKNALQNDNAPPGNGEGEAGFIPWFSGKREQPKQRSKMTWYRQARERESKGLFLGSPGNEQSIDSKK
NVE2974	KR	ELIPKIVLQNDNAPPGNGEGEAGFIPWFS	GKR	MSNYFLHWVTALAFILCSGLANGKIPKVPIKEVENAPPSTGEGEAGFIPWFSGKREFNPKNALKNDNAPPGNEEGEAGFIPWFSGKRELIPKIVLQNDNAPPGNGEGEAGFIPWFSGKREFEPKNALQNDNAPPGNGEGEAGFIPWFSGKRDTNQKMHYKMTMHRPAMAKGRLVSFLGFQARGTQPKQRYKMTWYRQARERESKGLFLGSPGNEQSIDSKK
NVE339	KK	EANLRPLSPENHADALKDAIARKSPVLKNF	KK	MRAVLVCAVLVLCLVAVKANKDEKEASEKVKKEANLRPLSPENHADALKDAIARKSPVLKNFKKEIKNFKLEKKKMWEKIQELKRKLADEKRAEKAMKSLSKDERKIKRKINKGMIKKLLEHKRKLVTRMKNARNAKREHLKRHKNSKRGKLHKKQAKVNQKRNKGHQKRGKDHHKREKSQHKREKHQKKNLNKRNKQNKRGHKTTIADAGPLRIMPIS
NVE339	KR	KINKGMIKKLLEH	KR	MRAVLVCAVLVLCLVAVKANKDEKEASEKVKKEANLRPLSPENHADALKDAIARKSPVLKNFKKEIKNFKLEKKKMWEKIQELKRKLADEKRAEKAMKSLSKDERKIKRKINKGMIKKLLEHKRKLVTRMKNARNAKREHLKRHKNSKRGKLHKKQAKVNQKRNKGHQKRGKDHHKREKSQHKREKHQKKNLNKRNKQNKRGHKTTIADAGPLRIMPIS
NVE339	NL	RPLSPENHADALKDAIA	RK	MRAVLVCAVLVLCLVAVKANKDEKEASEKVKKEANLRPLSPENHADALKDAIARKSPVLKNFKKEIKNFKLEKKKMWEKIQELKRKLADEKRAEKAMKSLSKDERKIKRKINKGMIKKLLEHKRKLVTRMKNARNAKREHLKRHKNSKRGKLHKKQAKVNQKRNKGHQKRGKDHHKREKSQHKREKHQKKNLNKRNKQNKRGHKTTIADAGPLRIMPIS
NVE3482	LG	QLPPAIQALTGTDLSGVLNKIPGARQA	Precursor end	MTLNPTCEAVETAQGVAVTVTGVAQVKVMTEPRLLKTACEQFLGKTTRQIESVVLQTLEGHLRAILGTLSVEEIYKDREAFAALVREVASPDVGRMGIEILSFTIKDIEDHVDYLNSLGKTQTAKVKRDADIGVAEAKRDAGIREAECEKQKMDVVYETQTNIADSSREYQMQKAAYDQEVNTRKAEAELSYELQGNKEKQKIRSEEIQIEVVERRKQIEVQEKEIQRKEKELIAEVKRPAEAESYKVETLAQGKRTQTVFLAQADAERIKLIGSSEASAIEAIGKAEAERMRQKAAAYKMYGDAAMTALILEALPKVAAEVAAPLAKTGEIVIINDDGNSVSGELSKLLGQLPPAIQALTGTDLSGVLNKIPGARQA
NVE3865	SR	EYEEEIREGLEAAMRFPKSPFDAQAMMRPA	KK	MKTLCLVAGICLLLAVTLLQAQGLSREYEEEIREGLEAAMRFPKSPFDAQAMMRPAKKSDLPPRFGGYGRR
NVE3865	QG	LSREYEEEIREGLEAAMRFPKSPFDAQAMMRPA	KK	MKTLCLVAGICLLLAVTLLQAQGLSREYEEEIREGLEAAMRFPKSPFDAQAMMRPAKKSDLPPRFGGYGRR
NVE3865	GL	SREYEEEIREGLEAAMRFPKSPFDAQAMMRPA	KK	MKTLCLVAGICLLLAVTLLQAQGLSREYEEEIREGLEAAMRFPKSPFDAQAMMRPAKKSDLPPRFGGYGRR
NVE4012|Nvec_XP_032233649.1	RR	EDIPSDDDQLMFRPGRNEEQLFRP	GRR	MYSCMGISLLLILCFKGSYGEESIDLEPGVDKVPEKVEHGEEGSAKYNINTVTLTGNKATGNKVTNDDKRPPWPPRPGKRTFRPQESADTPSIFRPGRSVHEDQLLFRPGRANLHKRQGLMFRPGRREDVPKPQIFRPGRREDIPSDDDQLMFRPGRNEEQLFRPGRRSDVGDEQLLFRPGRRSDLEEDQLIFRPGRRSDVAEEQLFRPGRRSDVPEAFLDQWTSVRPGRGGYRMPWTYTGNSVNSHVSQKSHTFRQKAVEQEKKKREV
NVE4068	GF	AGDDAPRAVFPSIV	GRP	MCDDDVAALVVDNGSGMCKAGFAGDDAPRAVFPSIVGRPRHQGVMVGMGQKDSYVGDEAQSKRGILTLKYPIEHGIVTNWDDMEKVIDDCNSSCLLCKVVTYRHLIV
NVE4601	KE	IPPQGFRFNQWG	KK	MDESKEIPPQGLRFSQWGKKEIPPQGFRFNQWGKKEIPPQGFRFNQWGKKEIPPQGLRFNQWGKKEIPPQGLRFNQWGKKEIPPQGLRFSQWGKREIPPQGLRFNQWGKKEIPPQGLRFNQWGKKEIPPQGLRFNQWGKKEIPPQGLRFNQWGKKEIPPQGLRFNQWGKKEIPPQGLRFNQWGKKEIPPQGLRFSQWGKKEIPPQGLRFNQWGKKEIPPQGLRFNQWGKRKLINQVMI
NVE4601	KE	IPPQGLRFSQWG	KK	MDESKEIPPQGLRFSQWGKKEIPPQGFRFNQWGKKEIPPQGFRFNQWGKKEIPPQGLRFNQWGKKEIPPQGLRFNQWGKKEIPPQGLRFSQWGKREIPPQGLRFNQWGKKEIPPQGLRFNQWGKKEIPPQGLRFNQWGKKEIPPQGLRFNQWGKKEIPPQGLRFNQWGKKEIPPQGLRFNQWGKKEIPPQGLRFSQWGKKEIPPQGLRFNQWGKKEIPPQGLRFNQWGKRKLINQVMI
NVE4601	KR	KLINQVMI	Precursor end	MDESKEIPPQGLRFSQWGKKEIPPQGFRFNQWGKKEIPPQGFRFNQWGKKEIPPQGLRFNQWGKKEIPPQGLRFNQWGKKEIPPQGLRFSQWGKREIPPQGLRFNQWGKKEIPPQGLRFNQWGKKEIPPQGLRFNQWGKKEIPPQGLRFNQWGKKEIPPQGLRFNQWGKKEIPPQGLRFNQWGKKEIPPQGLRFSQWGKKEIPPQGLRFNQWGKKEIPPQGLRFNQWGKRKLINQVMI
NVE5329	VP	ARNDDIVYTTIDCPPGIWVCKK	RR	MNSIPVLLVLLGALTETVLSVPARNDDIVYTTIDCPPGIWVCKKRRSEIAQPVRREPRVDCPPGVWTCQKKREEIAQQAEAASGQTGESDDINLCPPGIWVCDRKRELKRLREQRAKAVPNKPAKRINMCPPGIWVCD
NVE5329	LS	VPARNDDIVYTTIDCPPGIWVCKKRRSEIAQPV	RR	MNSIPVLLVLLGALTETVLSVPARNDDIVYTTIDCPPGIWVCKKRRSEIAQPVRREPRVDCPPGVWTCQKKREEIAQQAEAASGQTGESDDINLCPPGIWVCDRKRELKRLREQRAKAVPNKPAKRINMCPPGIWVCD
NVE5400	LK	HTETQEKNPLPTKETIEQEKQG	Precursor end	MSDKPDISEVTKFDKSKLKHTETQEKNPLPTKETIEQEKQG
NVE5400	KH	TETQEKNPLPTKETIEQEKQG	Precursor end	MSDKPDISEVTKFDKSKLKHTETQEKNPLPTKETIEQEKQG
NVE5882	EE	FVTGETVSRL	RR	MAAKTLLLVATIAGSLTLHIHARSKGTQLHHHMTEAELRKFFSVDSRNKVPAYDIVHPFLSDESGNFLSYNLRPHEKSRQRRSTGPEEPDFHYFKVRAMGKNLHLKVAKSDGLLSERARVHTVHKDGSKTSSDVPREAEYYSGHVTSHPDSMVALRSDGGLAGLISTPDDTLFIQPLPSHLARHYVQKGRAQPHVVHQRSVHDVMEEFVTGETVSRLRRSIDAPLTKRTGYKYLETHMIADNFITSKYGNETTNVLLMIAHVTRQVFLGGSAGDIKIHLVVVGITLNTGGLGYTSSASKGDRIAALGTWMGTNIPSEDSNSAHADVVVLVTNTVGGLAEAGSVCSSTGRVLVGDTGIQTASAMAHEIAHALNVGHDADTSRSDCLDGQFLMSGTLGSGV…
NVE6207	KR	ESREPAQQPISTDNTDDLDFEDGLRAKLLRMLRKQPQ	Precursor end	MASSSVRFLALGFIAVIMLSLTEAKRKCRPMSVFCKRKRESREPAQQPISTDNTDDLDFEDGLRAKLLRMLRKQPQ
NVE6394	GF	AGDDAPRAVFPSIV	GRP	MYQHDDIAALVIDNGSGMCKAGFAGDDAPRAVFPSIVGRPRHQGVMVGMGQKDSYVGDEAQSKRGILSLRYPIEHGIVTNWDDMEKIWHHTFYNELRVAPEEHPSLLTEAPLNPKGNREKMTQIMFEAFNSPAVYVAIQAVLSLYASGRTTGVVFDSGDGVSHNVPIYEGYALPHAILRLDLAGRDLTDYLMKLMTERGYSFTTTAEREIVRDIKEKLCYVALDFYQEMDIDANSPILEKTYELPDGQVISIGNERFRCPEAMFQPAFLGMEAPGIHEAIYNCIMKCDVDIRKDLYSNCVLSGGSTMFPGIADRMQKEIAMLANASMKVKVIAPPERKYSVWIGGSILASLSTFQQMWIAKEEYQEYGPPIVHRKCF
NVE6636	KR	QVRISETTDPWVWEPKRQRLAKV	GRE	MSRLVILLVFCLVLVSLALGQLITEGGEGINAGGACKRANGMACSDTTQGWEKVDMKRQVRISETTDPWVWEPKRQRLAKVGREQKEDEDNNLGGGGWFRRQAMQWGHKGWAKRQAQLNEGWKSVNDDKGWAKPHAQLNEGWKSVNEGTKAGQNDKRN
NVE7357	KR	SVEDVPKVPLPFL	Precursor end	MKFAVALVLVAVASAMPSKRSGDVCVSPEQFVGRYTTYIHKDSGEESAVPGNMYYDWRHKRIRVDVQVEGVTYKSYLIYNEKVGYTVFGERCYKYALTTPFTPVELPADATLLESGRAGSSEHGLNVKRFHGKVLGVPFLATVTADECILVSSVGRKDDTTVIFSLLDVSRLEVTDDDFKRPTECVEVGNEKRSVEDVPKVPLPFL
NVE7509	LE	SPNKLPTFNL	Precursor end	MNLSATPKEQKAHPSYEYLKFPSLFTGEVFVLDDGGEVDLDLGNYERFLDVTLHRNNNITTGKIYQEVIQKERNGDYLGKTVQVVPHITDAIQDWVRKVAEDPVEGKRVADVCIVELGGTIGDIEGMPFVEAFRQFQFNVGRENFCVVHVSLIPTPSATGEQKTKPTQNSVRELRGLGLSPDLIMCRCKYSVTEEVKKKISLFCHVSPDQVIDVHDCKSIYRVPLLLSQQGLVKFFAQRLNMMEMRSPKPRHFMVHWKELAEREERVLEEVKIGIVGKYTKLEDAYLSLLKALKHSTLHCNKKLNVVWVDAESLEKESQHSDPVKYHDAWQRLCGVDGILVPGGFGARGTEGKIAAAEWARTKNKPYLGVCYGMQLAVIEFARNVLGWKDANTTEVDPD…
NVE7520	TL	QAVSRKANALHDDLPLFGPKEGSGPNPREFTEEQLKAAKAKGALR	Precursor end	MSKPRAFGFSAEAIAKVDAKYPKELEGNARRWVETMYGDTVAWGEERPNQRPGETFAEPLRSGVILCKIANKIKSNAIPKIGESNKSFVMQENISKFLDFCERVLGLDRLNLFQTVDLFERQNVGMVITTLQAVSRKANALHDDLPLFGPKEGSGPNPREFTEEQLKAAKAKGALR
NVE7549|Nvec_RFamide	AS	MPEQDANPQTRFDG	KK	MAPRPGTLLLLGILIQVLICTAKSTYKKEIADLLDDNKDTPQFWKGRFSDPQFWKGRFSDPQFWKGRFSDPQFWKGRFSDPQFWKGRFSDPQFWKGRFSDPQFWKGRFSDPQFWKGRFADELLNGGHHKHHHEEGEWKRTAGPGRFGREDQGRFGREDQGRFGREDQGRFGREDQGRFGREDQGRFGREDQGRFGREDQGRFGREDQGRFGREDQGRFGREDQGRFGREDQGRFGREDQGRFGREDQGRFGREDQGRFGREDQGRFGREDQGRFGREDQGRFGREDQGRFGREDQGRFGREDQGRFGREDQGRFGREDQGRFGRNKIARVIDLDQGRFGRTMDTATKKDTVASMPEQDANPQTRFDGKKRQAAKERSIEKKSTISSDAKASDAKQS
NVE7771	TH	APPGGASHIVLG	Precursor end	MSEINVGITDHKSTKVLAPPGGKDSISFGVSDLGENSAQVKACQVERNKSNIFVGGDLNLPHKGNAKSCQEARQRSQVFTAPNEPLPVKPSTAHGKNSGDIIRANSQDEPQRTSVRTHAPPGGASHIVLG
NVE7965	SS	EDDGKSAFLKGLAQLEKDRTVGFSAGLGRLTDGRD	RR	MILAFVLLVIAPLSSSSEDDGKSAFLKGLAQLEKDRTVGFSAGLGRLTDGRDRRDTDSLLGLRHKRAIGEIKANTLRLMRPAGIPNRNGTGRVEVYHNAKWGTICDRDWDREDAEVVCRELGMIKAIHETRKAKFGLGYGPIWLSGMQCTGKENSLLECKHDGWGQASGCTHKDDAGVKCLHTAVPSIIEVGCYKDKPNRALRALIANLRSEINWYNVRSMVTKCAERAAQGGYKYFGIQFYGECWADNEAESRYDMYGLADPKDNKQRCFEGTGMHYANFVYKFAPWKDMGCWLDYHDARTMTKLLVNLRLQIDWFNIGKTIDYCYKAAKQGGWRFFSIQFYGECWVTNDDKSFRRHGPSVSCWNGVGQRITNYVYEIV
NVE7965	SS	SEDDGKSAFLKGLAQLEKDRTVGFSAGLGRLTDGRD	RR	MILAFVLLVIAPLSSSSEDDGKSAFLKGLAQLEKDRTVGFSAGLGRLTDGRDRRDTDSLLGLRHKRAIGEIKANTLRLMRPAGIPNRNGTGRVEVYHNAKWGTICDRDWDREDAEVVCRELGMIKAIHETRKAKFGLGYGPIWLSGMQCTGKENSLLECKHDGWGQASGCTHKDDAGVKCLHTAVPSIIEVGCYKDKPNRALRALIANLRSEINWYNVRSMVTKCAERAAQGGYKYFGIQFYGECWADNEAESRYDMYGLADPKDNKQRCFEGTGMHYANFVYKFAPWKDMGCWLDYHDARTMTKLLVNLRLQIDWFNIGKTIDYCYKAAKQGGWRFFSIQFYGECWVTNDDKSFRRHGPSVSCWNGVGQRITNYVYEIV
NVE8677	MG	SYPFTSTKPELVDQHKAEMEIDSKPVNTE	Precursor end	MGRLRKKRMHSNDKHLKKKYRTRKRTKDLDQIHEDLKPVKAAKLLSQEVDTDLPGCGQFYCLQCARYFIDDKSLKDHIKSRVHKKKLRMLKEVPYTIEESEAAAGMGSYPFTSTKPELVDQHKAEMEIDSKPVNTE
NVE9233	KR	LDSLKRLKAKARPQMYRYQEVTNT	Precursor end	MKLKPNTQAINTVSSEARPQAAGSSILNSTVTERRGFNMKSTTLSILLGLFVLAAMTLPDVNAWTGIIGASAPSGEEEGGNRLAHLFYKRLDSLKRLKAKARPQMYRYQEVTNT
NVE9858	QA	GAPGLWGREAGAPGLW	GKR	MLVPGLSNFLLPMECYCTNFFXXXXXXXXXXXXXXXXXCLALCHAETKRKAADTTDTENELDASPNVNNDDDNDIKRMPTDTKRQAGAPGLCRKRSPKPPGLWGKRQAGAPGLWGKRSAGPPGLWGKRDAGPPGLWGKRVAGPPGLWGKRQAGAPGLWGREAGAPGLWGKRRAGAPGLWGKREANAPGLWGKRQAGPPGLWGKREANAPGLWGKRQAGPPGLWGKRDEDEDEDMDETNGDPLWGRSADAGPPGLWGRKKRAASPQRDLYGIGLWGRNAALMTAEELDLSFKNEEQS
NVE9858	DA	GPPGLWGKRVAGPPGLW	GKR	MLVPGLSNFLLPMECYCTNFFXXXXXXXXXXXXXXXXXCLALCHAETKRKAADTTDTENELDASPNVNNDDDNDIKRMPTDTKRQAGAPGLCRKRSPKPPGLWGKRQAGAPGLWGKRSAGPPGLWGKRDAGPPGLWGKRVAGPPGLWGKRQAGAPGLWGREAGAPGLWGKRRAGAPGLWGKREANAPGLWGKRQAGPPGLWGKREANAPGLWGKRQAGPPGLWGKRDEDEDEDMDETNGDPLWGRSADAGPPGLWGRKKRAASPQRDLYGIGLWGRNAALMTAEELDLSFKNEEQS
NVE9858	KR	QAGAPGLWGREAGAPGLW	GKR	MLVPGLSNFLLPMECYCTNFFXXXXXXXXXXXXXXXXXCLALCHAETKRKAADTTDTENELDASPNVNNDDDNDIKRMPTDTKRQAGAPGLCRKRSPKPPGLWGKRQAGAPGLWGKRSAGPPGLWGKRDAGPPGLWGKRVAGPPGLWGKRQAGAPGLWGREAGAPGLWGKRRAGAPGLWGKREANAPGLWGKRQAGPPGLWGKREANAPGLWGKRQAGPPGLWGKRDEDEDEDMDETNGDPLWGRSADAGPPGLWGRKKRAASPQRDLYGIGLWGRNAALMTAEELDLSFKNEEQS
NVE9896	RF	YKNGEMVDEVVGASESKLKELFAKHNK	Precursor end	MPTFRFYKNGEMVDEVVGASESKLKELFAKHNK
NVE9956|HADO01002733.1	KR	REAMGGQDPLVQLAQGPDSDDLWRARMAYLRA	RR	MSPTMKYVLVAVLFCALVAPRFTHGFYRVGRELEKRREAMGGQDPLVQLAQGPDSDDLWRARMAYLRARRTEAKKTEQR
Nvec_comp12848_Phoenixin	LF	PEVYQDIQRDRRKGIKQEEIQPGNMKVWSDPFKKD	Precursor end	MSSQVRSGIVIGGFVALTVAMMFPIAIYPKLFPEVYQDIQRDRRKGIKQEEIQPGNMKVWSDPFKKD
Nvec_GLWamide	QA	GAPGLWGREAGAPGLW	GKR	MALFGHTLVAVLFCLALCHAETKRKAADTTDTENELDASPNVNNDDDNDIKRMPTDTKRQAGAPGLWGKRDAGPPGLWGKRDAGPPGLWGKRSPKPPGLWGKRQAGAPGLWGKRSAGPPGLWGKRDAGPPGLWGKRVAGPPGLWGKRQAGAPGLWGREAGAPGLWGKRQAGAPGLWGKREAGAPGLWGREANAPGLWGKRRAGAPGLWGKREANAPGLWGKRQAGPPGLWGKREANAPGLWGKRQAGPPGLWGKREANAPGLWGKRQAGPPGLWGKRDEDEDEDMDETNGDPLWGRSADAGPPGLWGRKKRAASPQRDLYGIGLWGRNAALMTAEELDLSFKNEEQS
Nvec_GLWamide	EA	GAPGLWGREANAPGLW	GKR	MALFGHTLVAVLFCLALCHAETKRKAADTTDTENELDASPNVNNDDDNDIKRMPTDTKRQAGAPGLWGKRDAGPPGLWGKRDAGPPGLWGKRSPKPPGLWGKRQAGAPGLWGKRSAGPPGLWGKRDAGPPGLWGKRVAGPPGLWGKRQAGAPGLWGREAGAPGLWGKRQAGAPGLWGKREAGAPGLWGREANAPGLWGKRRAGAPGLWGKREANAPGLWGKRQAGPPGLWGKREANAPGLWGKRQAGPPGLWGKREANAPGLWGKRQAGPPGLWGKRDEDEDEDMDETNGDPLWGRSADAGPPGLWGRKKRAASPQRDLYGIGLWGRNAALMTAEELDLSFKNEEQS
Nvec_GLWamide	DA	GPPGLWGKRVAGPPGLW	GKR	MALFGHTLVAVLFCLALCHAETKRKAADTTDTENELDASPNVNNDDDNDIKRMPTDTKRQAGAPGLWGKRDAGPPGLWGKRDAGPPGLWGKRSPKPPGLWGKRQAGAPGLWGKRSAGPPGLWGKRDAGPPGLWGKRVAGPPGLWGKRQAGAPGLWGREAGAPGLWGKRQAGAPGLWGKREAGAPGLWGREANAPGLWGKRRAGAPGLWGKREANAPGLWGKRQAGPPGLWGKREANAPGLWGKRQAGPPGLWGKREANAPGLWGKRQAGPPGLWGKRDEDEDEDMDETNGDPLWGRSADAGPPGLWGRKKRAASPQRDLYGIGLWGRNAALMTAEELDLSFKNEEQS
Nvec_GLWamide	KR	QAGAPGLWGREAGAPGLW	GKR	MALFGHTLVAVLFCLALCHAETKRKAADTTDTENELDASPNVNNDDDNDIKRMPTDTKRQAGAPGLWGKRDAGPPGLWGKRDAGPPGLWGKRSPKPPGLWGKRQAGAPGLWGKRSAGPPGLWGKRDAGPPGLWGKRVAGPPGLWGKRQAGAPGLWGREAGAPGLWGKRQAGAPGLWGKREAGAPGLWGREANAPGLWGKRRAGAPGLWGKREANAPGLWGKRQAGPPGLWGKREANAPGLWGKRQAGPPGLWGKREANAPGLWGKRQAGPPGLWGKRDEDEDEDMDETNGDPLWGRSADAGPPGLWGRKKRAASPQRDLYGIGLWGRNAALMTAEELDLSFKNEEQS
Nvec_HIRamide	EG	ASDEKRDSKQPPIDLSPAAYFHIR	GKR	MRLYLFVPVFALVLAVEGASDEKRDSKQPPIDLSPAAYFHIRGKRTYNAPPLDLSGPAYFHIRGKRTAKQPPYLDLGEPSFFHIRGKRTEGPPYIDLTEPSFFHIRGKRSSEQPPLDLGPAYFHIRGKRTKNPPIDLGPAYFHIRGKRLSGEQPPYLDLTPAYFHIRGKRTQQPPMIDLSEPAFFHIRGRRAVEQPPYLDLTPSYFHIRGKRTEYPPFLELGQPSYFHIRGRRAEKTTKD
Nvec_HIRamide	AV	EQPPYLDLTPSYFHIR	GKR	MRLYLFVPVFALVLAVEGASDEKRDSKQPPIDLSPAAYFHIRGKRTYNAPPLDLSGPAYFHIRGKRTAKQPPYLDLGEPSFFHIRGKRTEGPPYIDLTEPSFFHIRGKRSSEQPPLDLGPAYFHIRGKRTKNPPIDLGPAYFHIRGKRLSGEQPPYLDLTPAYFHIRGKRTQQPPMIDLSEPAFFHIRGRRAVEQPPYLDLTPSYFHIRGKRTEYPPFLELGQPSYFHIRGRRAEKTTKD
Nvec_HIRamide	LS	GPAYFHIR	GKR	MRLYLFVPVFALVLAVEGASDEKRDSKQPPIDLSPAAYFHIRGKRTYNAPPLDLSGPAYFHIRGKRTAKQPPYLDLGEPSFFHIRGKRTEGPPYIDLTEPSFFHIRGKRSSEQPPLDLGPAYFHIRGKRTKNPPIDLGPAYFHIRGKRLSGEQPPYLDLTPAYFHIRGKRTQQPPMIDLSEPAFFHIRGRRAVEQPPYLDLTPSYFHIRGKRTEYPPFLELGQPSYFHIRGRRAEKTTKD
Nvec_HIRamide	RT	KNPPIDLGPAYFHIR	GKR	MRLYLFVPVFALVLAVEGASDEKRDSKQPPIDLSPAAYFHIRGKRTYNAPPLDLSGPAYFHIRGKRTAKQPPYLDLGEPSFFHIRGKRTEGPPYIDLTEPSFFHIRGKRSSEQPPLDLGPAYFHIRGKRTKNPPIDLGPAYFHIRGKRLSGEQPPYLDLTPAYFHIRGKRTQQPPMIDLSEPAFFHIRGRRAVEQPPYLDLTPSYFHIRGKRTEYPPFLELGQPSYFHIRGRRAEKTTKD
Nvec_HIRamide	TK	NPPIDLGPAYFHIRG	KR	MRLYLFVPVFALVLAVEGASDEKRDSKQPPIDLSPAAYFHIRGKRTYNAPPLDLSGPAYFHIRGKRTAKQPPYLDLGEPSFFHIRGKRTEGPPYIDLTEPSFFHIRGKRSSEQPPLDLGPAYFHIRGKRTKNPPIDLGPAYFHIRGKRLSGEQPPYLDLTPAYFHIRGKRTQQPPMIDLSEPAFFHIRGRRAVEQPPYLDLTPSYFHIRGKRTEYPPFLELGQPSYFHIRGRRAEKTTKD
Nvec_HIRamide	KR	SSEQPPLDLGPAYFHIRGKRTKNPPIDLGPAYFHIR	GKR	MRLYLFVPVFALVLAVEGASDEKRDSKQPPIDLSPAAYFHIRGKRTYNAPPLDLSGPAYFHIRGKRTAKQPPYLDLGEPSFFHIRGKRTEGPPYIDLTEPSFFHIRGKRSSEQPPLDLGPAYFHIRGKRTKNPPIDLGPAYFHIRGKRLSGEQPPYLDLTPAYFHIRGKRTQQPPMIDLSEPAFFHIRGRRAVEQPPYLDLTPSYFHIRGKRTEYPPFLELGQPSYFHIRGRRAEKTTKD
Nvec_QWamide	KE	IPPQGFRFNQWG	KK	MLKLITLAKSAQFKLTKRSRIYIKASFYNHAWCLHRLLWLSSYCRKSKFRQGLTDQPMDESKEIPPQGLRFSQWGKKEIPPQGFRFNQWGKKEIPPQGLRFNQWGKKEIPPQGFRFSQWGKKEIPPQGFRFNQWGKKEIPPQGLRFNQWGKKEIPPQGLRFNQWGKKEIPPQGLRFSQWGKREIPPQGLRFNQWGKKEIPPQGLRFNQWGKKEIPPQGLRFNQWGKKEIPPQGLRFNQWGKKEIPPQGLRFNQWGKKEIPPQGLRFNQWGKKEIPPQGLRFSQWGKKEIPPQGLRFNQWGKKEIPPQGLRFNQWGKRKLINQVMI
Nvec_QWamide	KE	IPPQGLRFSQWG	KK	MLKLITLAKSAQFKLTKRSRIYIKASFYNHAWCLHRLLWLSSYCRKSKFRQGLTDQPMDESKEIPPQGLRFSQWGKKEIPPQGFRFNQWGKKEIPPQGLRFNQWGKKEIPPQGFRFSQWGKKEIPPQGFRFNQWGKKEIPPQGLRFNQWGKKEIPPQGLRFNQWGKKEIPPQGLRFSQWGKREIPPQGLRFNQWGKKEIPPQGLRFNQWGKKEIPPQGLRFNQWGKKEIPPQGLRFNQWGKKEIPPQGLRFNQWGKKEIPPQGLRFNQWGKKEIPPQGLRFSQWGKKEIPPQGLRFNQWGKKEIPPQGLRFNQWGKRKLINQVMI
Nvec_QWamide	KR	KLINQVMI	Precursor end	MLKLITLAKSAQFKLTKRSRIYIKASFYNHAWCLHRLLWLSSYCRKSKFRQGLTDQPMDESKEIPPQGLRFSQWGKKEIPPQGFRFNQWGKKEIPPQGLRFNQWGKKEIPPQGFRFSQWGKKEIPPQGFRFNQWGKKEIPPQGLRFNQWGKKEIPPQGLRFNQWGKKEIPPQGLRFSQWGKREIPPQGLRFNQWGKKEIPPQGLRFNQWGKKEIPPQGLRFNQWGKKEIPPQGLRFNQWGKKEIPPQGLRFNQWGKKEIPPQGLRFNQWGKKEIPPQGLRFSQWGKKEIPPQGLRFNQWGKKEIPPQGLRFNQWGKRKLINQVMI
NVEC200_000005_1.1	LA	NTPVELRPMQIRTFKATLRM	KK	MGVLGKKCDILAVLYLTCFISSSLCFQCAEKGAGKDAEKLQIHIVPHTHDDVGWLKTVDEYFYGANNSIQHAGVQYILDSVIPALNEDPNKRFIYVEIAFFKRWWDQQNVEMQEIVKKLVLQKRLEFINGGWCMNDEAATHYNAIIDQMTVGLKFIEETFGSDARPRIAWHIDPFGHSNEQASLFAQMSFDGFFFGRIDYDDKTLRLKQQRMEMVWRGSKSGNLGKNSDIFTGVLYNGYNPPPGFCFDQFCSDQPIQDDPRLYDENVKQRVEEFIKLACEQGSQYKSNNIMMTMGSDFMYENANLWYKNLDKLIAHVNQDSRVRAFYSTPTTYLEALHAANLTWGLKTDDFFPYADCPHCYWTGYFTSRPALKRYSRLNNNLLQACKQLEVLNGPAQSG…
NVEC200_000005_1.1	LA	NTPVELRPMQIRTFKATLRMK	KK	MGVLGKKCDILAVLYLTCFISSSLCFQCAEKGAGKDAEKLQIHIVPHTHDDVGWLKTVDEYFYGANNSIQHAGVQYILDSVIPALNEDPNKRFIYVEIAFFKRWWDQQNVEMQEIVKKLVLQKRLEFINGGWCMNDEAATHYNAIIDQMTVGLKFIEETFGSDARPRIAWHIDPFGHSNEQASLFAQMSFDGFFFGRIDYDDKTLRLKQQRMEMVWRGSKSGNLGKNSDIFTGVLYNGYNPPPGFCFDQFCSDQPIQDDPRLYDENVKQRVEEFIKLACEQGSQYKSNNIMMTMGSDFMYENANLWYKNLDKLIAHVNQDSRVRAFYSTPTTYLEALHAANLTWGLKTDDFFPYADCPHCYWTGYFTSRPALKRYSRLNNNLLQACKQLEVLNGPAQSG…
NVEC200_000296_1.1	QA	GAPGLWGREAGAPGLW	GKR	TIISLQSQAKYYCLVLAVCNFNAVSISATHRFAKSPCDIFNSEYLVKLPARLSTETHEGQRAKEGSTLQHRAMALFGHTLVAVLFCLALCHAETKRKAADTTDTENELDASPNVNNDDDNDIKRMPTDTKRQAGAPGLWGKRDAGPPGLWGKRDAGPPGLCRKRSPKPPGLWGKRQAGAPGLWGKRSAGPPGLWGKRDAGPPGLWGKRVAGPPGLWGKRQAGAPGLWGREAGAPGLWGKRQAGAPGLWGKREAGAPGLWGREANAPGLWGKRRAGAPGLWGKREANAPGLWGKRQAGPPGLWGKREANAPGLWGKRQAGPPGLWGKREANAPGLWGKRQAGPPGLWGKRDEDEDEDMDETNGDPLWGRSADAGPPGLWGRKKRAASPQRDLYGIGLWGR…
NVEC200_000296_1.1	EA	GAPGLWGREANAPGLW	GKR	TIISLQSQAKYYCLVLAVCNFNAVSISATHRFAKSPCDIFNSEYLVKLPARLSTETHEGQRAKEGSTLQHRAMALFGHTLVAVLFCLALCHAETKRKAADTTDTENELDASPNVNNDDDNDIKRMPTDTKRQAGAPGLWGKRDAGPPGLWGKRDAGPPGLCRKRSPKPPGLWGKRQAGAPGLWGKRSAGPPGLWGKRDAGPPGLWGKRVAGPPGLWGKRQAGAPGLWGREAGAPGLWGKRQAGAPGLWGKREAGAPGLWGREANAPGLWGKRRAGAPGLWGKREANAPGLWGKRQAGPPGLWGKREANAPGLWGKRQAGPPGLWGKREANAPGLWGKRQAGPPGLWGKRDEDEDEDMDETNGDPLWGRSADAGPPGLWGRKKRAASPQRDLYGIGLWGR…
NVEC200_000296_1.1	DA	GPPGLWGKRVAGPPGLW	GKR	TIISLQSQAKYYCLVLAVCNFNAVSISATHRFAKSPCDIFNSEYLVKLPARLSTETHEGQRAKEGSTLQHRAMALFGHTLVAVLFCLALCHAETKRKAADTTDTENELDASPNVNNDDDNDIKRMPTDTKRQAGAPGLWGKRDAGPPGLWGKRDAGPPGLCRKRSPKPPGLWGKRQAGAPGLWGKRSAGPPGLWGKRDAGPPGLWGKRVAGPPGLWGKRQAGAPGLWGREAGAPGLWGKRQAGAPGLWGKREAGAPGLWGREANAPGLWGKRRAGAPGLWGKREANAPGLWGKRQAGPPGLWGKREANAPGLWGKRQAGPPGLWGKREANAPGLWGKRQAGPPGLWGKRDEDEDEDMDETNGDPLWGRSADAGPPGLWGRKKRAASPQRDLYGIGLWGR…
NVEC200_000296_1.1	KR	QAGAPGLWGREAGAPGLW	GKR	TIISLQSQAKYYCLVLAVCNFNAVSISATHRFAKSPCDIFNSEYLVKLPARLSTETHEGQRAKEGSTLQHRAMALFGHTLVAVLFCLALCHAETKRKAADTTDTENELDASPNVNNDDDNDIKRMPTDTKRQAGAPGLWGKRDAGPPGLWGKRDAGPPGLCRKRSPKPPGLWGKRQAGAPGLWGKRSAGPPGLWGKRDAGPPGLWGKRVAGPPGLWGKRQAGAPGLWGREAGAPGLWGKRQAGAPGLWGKREAGAPGLWGREANAPGLWGKRRAGAPGLWGKREANAPGLWGKRQAGPPGLWGKREANAPGLWGKRQAGPPGLWGKREANAPGLWGKRQAGPPGLWGKRDEDEDEDMDETNGDPLWGRSADAGPPGLWGRKKRAASPQRDLYGIGLWGR…
NVEC200_000672_1.1	KK	TEKNIDQGPNPEINYKHVKDFFKSQQASSIVDVPKAV	KR	VSLSKHPGLPFGWSDRLRLNRKGELPTTFYRQFTPETHGSLMERNTLRFLCLFAFLIFHNVQLTKAISEECAHECNFDEVCYAGVCVKGYLKDTYDYYGDRLRSNEEYNQKNGYDKGYLDRRNDIPKRVYENREANVDSSEPTLEDRTLIKSLPLKDIYNDYRSELGARRGSTREKSQLPPLSSENWDSIRDEVSEGGDHEEKESSLLPPESDFPKASLSEDGLRKNVMPEVHPDSTLMGNGDEHGDMDNPNGKVMIKGIVKKTEKNIDQGPNPEINYKHVKDFFKSQQASSIVDVPKAVKREEDAKLFNTKFVTVTQGKTDEVDKEEDVSGKDRGTVKISLDKNLTRMQAMELLQILEKALWIKPPTPMFTFLKVTGQDISAQMKDNSYTQESGKQVA…
NVEC200_002800_1.1|Nvec_VRHamide	NA	GGPPPIYLPVRPG	KR	MKITPVMSCLVLASALLVTAECYRITDPGDLEKPQENDEPGPPMIKIPVRHGKREFNDDLEDTTLLHYPFRVARKRELFNAGGPPPIYLPVRPGKRGYYRDNIQETRQYLDPRPGKRSRNH
NVEC200_002800_1.1|Nvec_VRHamide	AG	GPPPIYLPVRP	GKR	MKITPVMSCLVLASALLVTAECYRITDPGDLEKPQENDEPGPPMIKIPVRHGKREFNDDLEDTTLLHYPFRVARKRELFNAGGPPPIYLPVRPGKRGYYRDNIQETRQYLDPRPGKRSRNH
NVEC200_002800_1.1|Nvec_VRHamide	YR	ITDPGDLEKPQENDEPGPPMIKIPVRH	GKR	MKITPVMSCLVLASALLVTAECYRITDPGDLEKPQENDEPGPPMIKIPVRHGKREFNDDLEDTTLLHYPFRVARKRELFNAGGPPPIYLPVRPGKRGYYRDNIQETRQYLDPRPGKRSRNH
NVEC200_003938_1.1	GH	ISPSSEEQWKRAKKGESIRPSDEQLPSIGGGLDPSFGSSHHEF	RR	MKPKLLIVCAVLAVLSGGVHSRALNGKFSQGVDASSISPSPAVQVPTPFGIDPTPTVKYPQATRTAEVPSQLDGNVIADKPTDRFQHGDNHVNPNDVDKSFHRRDVEELPDWIDDESSGEDFPSSDASILSENLATDEGYDSEYDEESSTHLPRMDMDQPDTVLPDYSSADDVDGSTAQDDDQSVEDDQFQEGDQFLDDVQPLDDDQSLEDEQFPEEDQSLNNDQFLEENQEDGTDDEGFDSGDEEDSLTSEEEEADEQPATSLPTIITELVNMYVYGGDNNVDEFSEEQATSFPTRITEMFSEYLNLGRKTDSSNAGKEDLGQEEETIPFPTRVANLVNKYLKSGVETEDRPTRVTEIMNSLYRGRNKPDSSNNDHKRAPATAFPTRVKELLNEYLYS…
NVEC200_003938_1.1	GG	LDPSFGSSHHEF	RR	MKPKLLIVCAVLAVLSGGVHSRALNGKFSQGVDASSISPSPAVQVPTPFGIDPTPTVKYPQATRTAEVPSQLDGNVIADKPTDRFQHGDNHVNPNDVDKSFHRRDVEELPDWIDDESSGEDFPSSDASILSENLATDEGYDSEYDEESSTHLPRMDMDQPDTVLPDYSSADDVDGSTAQDDDQSVEDDQFQEGDQFLDDVQPLDDDQSLEDEQFPEEDQSLNNDQFLEENQEDGTDDEGFDSGDEEDSLTSEEEEADEQPATSLPTIITELVNMYVYGGDNNVDEFSEEQATSFPTRITEMFSEYLNLGRKTDSSNAGKEDLGQEEETIPFPTRVANLVNKYLKSGVETEDRPTRVTEIMNSLYRGRNKPDSSNNDHKRAPATAFPTRVKELLNEYLYS…
NVEC200_004380_1.1	IG	QAPPPEQQSYPMQ	Precursor end	MSEIEAGKGKAAGIVGIFIIIFGLIDVILGIMWATYGGPDGQGLWSGFLLLLNGALGIVCWVNRNKVAAVFYLILALLNIILTIVQAALAALAWLIWQIIKGVILTKCSDASGRCVCRGESIPIGLDDCDVINTIDAIFLCLLILNGLAAIFVFAASIIGCMATCCASQPAQQTNVVIVQQPAAVGIGQAPPPEQQSYPMQ
NVEC200_004626_1.1	LS	SPPELPDVMKPQEGISNSDGS	Precursor end	WVRRGDAILETAIMEVFLMVRRLKLSIFLDCKEGTTVMELKKKIEGIIKRPPEDQKLFKDDQLLDDNKTLGDCGFTNQTAKAQTPALVGLALRREDDGEFEPVTIDALSSPPELPDVMKPQEGISNSDGS
NVEC200_004699_1.1	EE	KPPKNWYW	KR	SVQQSKKGLTAYDYIELFEGNALAHLLRKTTRMWTYGLVGFLFFFVALQAVQINGFEKGYCKVSLPQYVTPACSIKRKAGLHKQQKEFKLNAPSAAMPYARLAVSTKGYPKFVKDKPMLSSHLTEYATMVAAGRKFKELYKNMTKGKPEEMTYRDFLELNKYMRTALEKAFGHKMRLPSEYEPFQMDVTKYLSDKYFTEQRLAGANPLGLQQVTLSDEVGLSFSNLKKNLNPNFNWKKAVGEALGRRINNNEKLKEVIEEGLLFALRYPLADDMVFMKDIVDDHANRTLWPFYSPIALFASVEEKPPKNWYWKRWGWKGSHTLKPVAIQMDYKPDSAVFTPKDGGKWTLAKLNVQVTDGGYSQMVDHLSHAHLVAEAVCVSMERHLSHKHPLYQMLKFH…
NVEC200_005035_1.1	KR	EFEPKKALKNDNAPPGNEEGEARFIPWFS	GKR	YLIALDARHYPRLYLEMSNYFLHWVTALAFILCSGLANGKIPKVPIKEVENAPPSTGEGEAGFIPWFSGKREFEPKNALKNDNAPPGNGEGEAGFIPWFSGKREFEPKKALKNDNAPPGNEEGEARFIPWFSGKRELIPKIVLQNDNAPPGNGEGEAGFIPWFSGKREFEQKNALQNDNAPPGNGEGEAGFIPWFSGKREFEPKNALQNDNAPPGNGEGEAGFIPWFSGKRDTTKAAVQNDLVPPSKGAGEQGFIPWFSGKRTVNRLKEINTENDADANKAPPSGHNEAGFIPWFAGKRKV
NVEC200_005035_1.1	KR	EFEPKNALKNDNAPPGNGEGEAGFIPWFS	GKR	YLIALDARHYPRLYLEMSNYFLHWVTALAFILCSGLANGKIPKVPIKEVENAPPSTGEGEAGFIPWFSGKREFEPKNALKNDNAPPGNGEGEAGFIPWFSGKREFEPKKALKNDNAPPGNEEGEARFIPWFSGKRELIPKIVLQNDNAPPGNGEGEAGFIPWFSGKREFEQKNALQNDNAPPGNGEGEAGFIPWFSGKREFEPKNALQNDNAPPGNGEGEAGFIPWFSGKRDTTKAAVQNDLVPPSKGAGEQGFIPWFSGKRTVNRLKEINTENDADANKAPPSGHNEAGFIPWFAGKRKV
NVEC200_005035_1.1	KR	ELIPKIVLQNDNAPPGNGEGEAGFIPWFS	GKR	YLIALDARHYPRLYLEMSNYFLHWVTALAFILCSGLANGKIPKVPIKEVENAPPSTGEGEAGFIPWFSGKREFEPKNALKNDNAPPGNGEGEAGFIPWFSGKREFEPKKALKNDNAPPGNEEGEARFIPWFSGKRELIPKIVLQNDNAPPGNGEGEAGFIPWFSGKREFEQKNALQNDNAPPGNGEGEAGFIPWFSGKREFEPKNALQNDNAPPGNGEGEAGFIPWFSGKRDTTKAAVQNDLVPPSKGAGEQGFIPWFSGKRTVNRLKEINTENDADANKAPPSGHNEAGFIPWFAGKRKV
NVEC200_005035_1.1	AV	QNDLVPPSKGAGEQGFIPWFS	GKR	YLIALDARHYPRLYLEMSNYFLHWVTALAFILCSGLANGKIPKVPIKEVENAPPSTGEGEAGFIPWFSGKREFEPKNALKNDNAPPGNGEGEAGFIPWFSGKREFEPKKALKNDNAPPGNEEGEARFIPWFSGKRELIPKIVLQNDNAPPGNGEGEAGFIPWFSGKREFEQKNALQNDNAPPGNGEGEAGFIPWFSGKREFEPKNALQNDNAPPGNGEGEAGFIPWFSGKRDTTKAAVQNDLVPPSKGAGEQGFIPWFSGKRTVNRLKEINTENDADANKAPPSGHNEAGFIPWFAGKRKV
NVEC200_005035_1.1	KR	TVNRLKEINTENDADANKAPPSGHNEAGFIPWFA	GKR	YLIALDARHYPRLYLEMSNYFLHWVTALAFILCSGLANGKIPKVPIKEVENAPPSTGEGEAGFIPWFSGKREFEPKNALKNDNAPPGNGEGEAGFIPWFSGKREFEPKKALKNDNAPPGNEEGEARFIPWFSGKRELIPKIVLQNDNAPPGNGEGEAGFIPWFSGKREFEQKNALQNDNAPPGNGEGEAGFIPWFSGKREFEPKNALQNDNAPPGNGEGEAGFIPWFSGKRDTTKAAVQNDLVPPSKGAGEQGFIPWFSGKRTVNRLKEINTENDADANKAPPSGHNEAGFIPWFAGKRKV
NVEC200_005035_1.1	KR	TVNRLKEINTENDADANKAPPSGHNEAGFIPWFAGKRKV	Precursor end	YLIALDARHYPRLYLEMSNYFLHWVTALAFILCSGLANGKIPKVPIKEVENAPPSTGEGEAGFIPWFSGKREFEPKNALKNDNAPPGNGEGEAGFIPWFSGKREFEPKKALKNDNAPPGNEEGEARFIPWFSGKRELIPKIVLQNDNAPPGNGEGEAGFIPWFSGKREFEQKNALQNDNAPPGNGEGEAGFIPWFSGKREFEPKNALQNDNAPPGNGEGEAGFIPWFSGKRDTTKAAVQNDLVPPSKGAGEQGFIPWFSGKRTVNRLKEINTENDADANKAPPSGHNEAGFIPWFAGKRKV
NVEC200_005266_1.1	RE	APDLALLEKITRELGKNKN	Precursor end	MLKFLKGKSSKHEGKEDEEKHKAKKSSKDEKKHKKDKKKEKAASMGSLDGAGATTETRKIKKEKRKQKAASMASLDGSGPTIEKKKWRFGKKKTYEIGEAGGVTSVTKTTETRTETRPGGKTVTTTEVRTTRTRSDQRHPGVLLVQADKHDERAGRITDRNQEVDISGNRETSKIHVQKENGKRMENGKEFREDARIRSSNEEELISPEDKIESLQGETGPRNKVVTPGGKVVLIVTRKTSSGGKPAAVSDGKNVDRGNKMDPPKNVSPQMEKDIVKEEVNVQNAERSVDLPSWLEEVKEGDKPKDKMDGTVDIAFDVQGRNKPSLHSEPAVVETVKEEQVENSPEIDWSQLEDPQRRNTFTKTIITKRVKVDLPGNARQEDIPDGSTPQKWLVDVEKS…
NVEC200_005480_1.1	HL	PPSMPAPPSP	RK	MASLWSFWSSSQSDENGQKPDKMASLFLDDGSVYRGKLFGAAKNVPGEVVFQTGMVGYPESLTDPSYQAQLLILTYPLIGNYGAPEAKQDKHGLDLNFESHKIWAAALIVGDYIEEYSHWNAKRSLSTWLTEQGIPGISGIDTRALTKKIREKGTMLGKIVIDGTDPETVPFHDPNLENLVDIVSCKIPTVYNPQGTPHIIALDCGIKYNQIRCLVSRGACVKVVPWSHDFNPEVKNGDFDGVFLSNGPGDPSYCMAAIDNIRQHIHDKNPIPLFGICLGHQLLSLAVGCKSFKMKYGNRGHNIPCTHHGTNRCFITTQNHGFAIDTTSIPKDWSTLFTNANDQTNEGIIHNTLPFFSVQFHPEHMGGPRDLECLFDIFLETVKQYKLGKVSDMSVKER…
NVEC200_005515_1.1	KR	QTKEQVICEGPAKLALESYHIDLSKSHLCGENS	KR	MNKISALLFLGCVVAITWAFPREETMASEGPENETRIEDAEELESKSSYLSKREKLEEITGFAKMKKPYSSRREKLEEMRAFDRKRQTKEQVICEGPAKLALESYHIDLSKSHLCGENSKRWANDFKSFLRKRELEYHMSSNYRRNMNACCSPDCDWLLQYLEVDSQVIKCVDKK
NVEC200_005515_1.1	KR	WANDFKSFL	RK	MNKISALLFLGCVVAITWAFPREETMASEGPENETRIEDAEELESKSSYLSKREKLEEITGFAKMKKPYSSRREKLEEMRAFDRKRQTKEQVICEGPAKLALESYHIDLSKSHLCGENSKRWANDFKSFLRKRELEYHMSSNYRRNMNACCSPDCDWLLQYLEVDSQVIKCVDKK
NVEC200_005559_1.1	SA	IYRSAVIGAEPYNEPELPGGRHPNDDKRYTIQQLNLAARHRNVYFDRAGADPYGIGSPIISSR	GKR	MRGYLSLLCLGAHFAASSAIYRSAVIGAEPYNEPELPGGRHPNDDKRYTIQQLNLAARHRNVYFDRAGADPYGIGSPIISSRGKRSVQQYPSMQTYQGYNPNVNQKRDYIAKLNYAARHRNVYLDNVGGDPYGGSSPVINARSRIPHRHGRSLDQEKKKTIKARLGLCKGCCC
NVEC200_005559_1.1	AI	YRSAVIGAEPYNEPELPGGRHPNDDKRYTIQQLNLAARHRNVYFDRAGADPYGIGSPIISSR	GKR	MRGYLSLLCLGAHFAASSAIYRSAVIGAEPYNEPELPGGRHPNDDKRYTIQQLNLAARHRNVYFDRAGADPYGIGSPIISSRGKRSVQQYPSMQTYQGYNPNVNQKRDYIAKLNYAARHRNVYLDNVGGDPYGGSSPVINARSRIPHRHGRSLDQEKKKTIKARLGLCKGCCC
NVEC200_006106_1.1	SA	KPADTPMRVSSLPTVTEEESVLT	Precursor end	MNVAIIQMFQSVKQPNSRWSWLVCAASFCVHFLVGGVSNSFGTMFLALLREFKRSELETAWVGSFAIGMTYFCGPVSAALCERFGCRIIACVGSLLFMTASLITSYMSSIIPMYFTFGFMGGFGFSLMYFSSLFVLMQYFTDKLSLANGVVLAGSGCGSMAFSLLLGKMCSLYGVHAGFKTLAVAGVIGVLASSVYHPTVSDDEGELLVEDIDKDHERIPFRLRCYDAVKPGLHWQNKAFLLWTVSLGLVFFAVFIPYIYLVQIAKLRGIPPSQGSLMVGLMCISGTVGKIVFGRLADVRWVNRLYLLQASLVVIAIGAFVFPFLRSYPGLLTYALIHGFLDCGAAVMFGLVTRDIVGKEMMAAALGSMYGVVAIPLTAGPPVAGLMYESLGSYNAVYY…
NVEC200_008652_1.1	KR	LISHPRVIWAKQQRILDRQ	KR	NNSRRPNTSNHSGAHFALVKGRIPFFSSLMILRLYIWSLLVFTSLSVPVLLSDVQNNAEDVNSEDFDPFEQEDGASFSNVWAVQLDSNDGSLADAIARAHGFKNLGGIGTLTGHYEFVHDSTGSRMRRSMESRTKRLISHPRVIWAKQQRILDRQKRDFFDLLEARASQQQRSLGHERRKRFYHDPMFAKQWYLQNTGQFNIPEGNDIGVLPVWERGFTGKGVVVSILDDGLDHTHPDLKRNYDPKASWDFNDKDDDPFPNDVDPYNAHGTKCGGEVGAQADNDICGAGVAPNVSLGGIRMLDGVATDALEANALSYKPQYIDIYSNCWGPKDDGKTFGRPGKLGQKALEDGAKKGRGGKGSIYVWATGNGGLVDDDCNCDGYTSSIYTISIGAISSYG…
NVEC200_008914_1.1	SS	EDDGKSAFLKGLAQLEKDRTVGFSAGLGRLTDGRD	RR	MILAFVLLVIAPLSSSSEDDGKSAFLKGLAQLEKDRTVGFSAGLGRLTDGRDRRDTDSLLGLRHKRAIGEIKANTLRLMRPAGIPNRNGTGRVEVYHNAKWGTICDRDWDREDAEVVCRELGMIKAIHETRKAKFGLGYGPIWLSGMQCTGKENSLLECKHDGWGQASGCTHKDDAGVKCLHTAVPSIIEVGCYKDEMEPNRALRALIANLRSEIKWYNVRSMVTKCAERAAQGGYKYFGIQFYGECWADNEAESRYDMHGLADPKDNKQRCFEGTGMHYANFVYKFAPWKDMGCWLDYHNARAMTKLLVNLRLQIDWFNIGKTIDYCYKAAKQGGWRFFSIQFYGECWVTNDDKSFRRHGPSVSCWNGVGQRITNYVYEIV
NVEC200_008914_1.1	SS	SEDDGKSAFLKGLAQLEKDRTVGFSAGLGRLTDGRD	RR	MILAFVLLVIAPLSSSSEDDGKSAFLKGLAQLEKDRTVGFSAGLGRLTDGRDRRDTDSLLGLRHKRAIGEIKANTLRLMRPAGIPNRNGTGRVEVYHNAKWGTICDRDWDREDAEVVCRELGMIKAIHETRKAKFGLGYGPIWLSGMQCTGKENSLLECKHDGWGQASGCTHKDDAGVKCLHTAVPSIIEVGCYKDEMEPNRALRALIANLRSEIKWYNVRSMVTKCAERAAQGGYKYFGIQFYGECWADNEAESRYDMHGLADPKDNKQRCFEGTGMHYANFVYKFAPWKDMGCWLDYHNARAMTKLLVNLRLQIDWFNIGKTIDYCYKAAKQGGWRFFSIQFYGECWVTNDDKSFRRHGPSVSCWNGVGQRITNYVYEIV
NVEC200_009244_1.1	RQ	MRPVTDKMAANHPLLTGQRVLDALFPCVQGGTTAIPGAFGC	GKT	MAGAMDMADKLPKIRDQDSDSKFGYVFGVSGPVVIAENMSGAAMYELVRVGHSELVGEIIRLEGDMATIQVYEETSGVTVGDPVLRTKKPLSVELGPGIMGSIFDGIQRPLKDINEMTQSIYIPRGVNTQSLSRTVQWEFIPGNFKIGDHITGGDIYGYVQENTFIKHHIMLHPKAKGTITYIAPQGNYYIEDTILEIDFDGEKSKHCMLQVWPVRQMRPVTDKMAANHPLLTGQRVLDALFPCVQGGTTAIPGAFGCGKTVISQSLSKFSNSDVIIYVGCGERGNEMSEVLRDFPELTVEINGQVESIMKRTALVANTSNMPVAAREASIYTGITLSEYFRDMGHHVSMMADSTSRWAEALREISGRLAEMPADSGYPAYLGARLASFYERAGRVSCL…
NVEC200_009895_1.1	RE	IPPQGFRFNQWG	KK	MRGVFIVFFGFLLTVVSAKSAEERPTKDVRREIPPQGFRFNQWGKKEIPPQGFRFNQWGKKEIPPQGLRFNQWGKKEIPPQGFRFNQWGKKEIPPQGFRFNQWGKKEIPPQGFRFNQWGKKEIPPQGLRFNQWGKKEIPPQGLRFSQWGKKEIPPQGFRFNQWEKKEIPPQGLRFNQWGKKEIPPQGLRFNQWGKKEIPPQGLRFSQWGKREIPPQGLRFNQWGKKEIPPQGLRFNQWGKKEIPPQGLRFSQWGKKEIPPQGLRFNQWGKKEIPPQGLRFNQWGKRKLINQVMI
NVEC200_009895_1.1	KE	IPPQGLRFSQWG	KK	MRGVFIVFFGFLLTVVSAKSAEERPTKDVRREIPPQGFRFNQWGKKEIPPQGFRFNQWGKKEIPPQGLRFNQWGKKEIPPQGFRFNQWGKKEIPPQGFRFNQWGKKEIPPQGFRFNQWGKKEIPPQGLRFNQWGKKEIPPQGLRFSQWGKKEIPPQGFRFNQWEKKEIPPQGLRFNQWGKKEIPPQGLRFNQWGKKEIPPQGLRFSQWGKREIPPQGLRFNQWGKKEIPPQGLRFNQWGKKEIPPQGLRFSQWGKKEIPPQGLRFNQWGKKEIPPQGLRFNQWGKRKLINQVMI
NVEC200_009895_1.1	KR	KLINQVMI	Precursor end	MRGVFIVFFGFLLTVVSAKSAEERPTKDVRREIPPQGFRFNQWGKKEIPPQGFRFNQWGKKEIPPQGLRFNQWGKKEIPPQGFRFNQWGKKEIPPQGFRFNQWGKKEIPPQGFRFNQWGKKEIPPQGLRFNQWGKKEIPPQGLRFSQWGKKEIPPQGFRFNQWEKKEIPPQGLRFNQWGKKEIPPQGLRFNQWGKKEIPPQGLRFSQWGKREIPPQGLRFNQWGKKEIPPQGLRFNQWGKKEIPPQGLRFSQWGKKEIPPQGLRFNQWGKKEIPPQGLRFNQWGKRKLINQVMI
NVEC200_010517_1.1	KP	QAQLNEGWKSANYDKGWA	KR	TSFRAVEQGITMSRLVILLVFCLVLVSLALGQLITEGGEGINAGGACKRANGMACSDTTQGWEKVDMKRQVRISETTDPWVWEPKRQRLAKVGREQKEDEDNNLGGGGWFRRQAMQWGHKGWAKRQAQLNEGWKSVNDDKGWAKRQAQLNEGWKSVNDDKGWAKPQAQMNEGWKSVNDDKGWAKPHAQLNEGWKSVNDDKGWAKPQAQLNEGWKSANYDKGWAKRQAKLNKGWESANYDKGWAKRQAQLNDGWMHRQAAWRDEGKDKSGDKDLRFWGVAGRH
NVEC200_010517_1.1	KR	QVRISETTDPWVWEPKRQRLAKV	GRE	TSFRAVEQGITMSRLVILLVFCLVLVSLALGQLITEGGEGINAGGACKRANGMACSDTTQGWEKVDMKRQVRISETTDPWVWEPKRQRLAKVGREQKEDEDNNLGGGGWFRRQAMQWGHKGWAKRQAQLNEGWKSVNDDKGWAKRQAQLNEGWKSVNDDKGWAKPQAQMNEGWKSVNDDKGWAKPHAQLNEGWKSVNDDKGWAKPQAQLNEGWKSANYDKGWAKRQAKLNKGWESANYDKGWAKRQAQLNDGWMHRQAAWRDEGKDKSGDKDLRFWGVAGRH
NVEC200_012385_1.1	VP	QDTSLASSDKLSRKNAGAPCVGKDCEE	RR	NWPSIGHAKTINSRTLHLLFNTKRMLSVKLCIVLCVFVIVFEESRAVPQDTSLASSDKLSRKNAGAPCVGKDCEERRGIRAKWYRRCPKGALCSRTTRKEKSEHRRQNKKSFQSRENDEAPSKFAACKPDLMCKKKSDLPRRIAIRLGYRDAQDIPECPDAFWCKRRQKSQRRSFSCPPGLWCKRLAEDSTVCHEGFNCKRSVSAERLRAAGYSDSAKGCPPGLWCKRAVHAFKLNCPPGLWCKRESEDDQRPDRRENGIEQKSVKKGIEVDQRPDRQDSGVYQRLEGDENKPSSDCPPGLWCKRNNEVPRRSDKRVDRISDCPPGLWCKRGLTRNLAAVLGFKRSDSIANCPPGLWCKRSEKSLDVDCPLGYKCKRQISDDQGDLTAEYPGYETSRTM…
NVEC200_012480_1.1	WG	AEPAAPSSDWGTAVTMQEQAKPSTDWA	Precursor end	MLGFITFSSIFVKISRAKSTCGCFLGQTASKSVLFWNRPLGKTSSMALYASFRRNVIWFKLSIMSGGLDILQLKEEDVVKFLAAGVHLGANNCDFQMEDYVYKRKSDGVNIINVKKTWEKLLLAARIIVTIENPADVCVISARPYGQRAILKYASHTGATPIAGRFTPGTFTNQIQAAFREPRLLIVCDPRIDHQPVTEASYVNIPVIAFCNTDSPLRHVDVAIPCNNKGIHSIGLMFWLLAREVLRMRGSISRALPWEIMPDLYFYRDPEEAEKEEQAALARQQEEANAGTTAGFSEWGGAAPVDATPAALPDWNTRDQGDWGADPMATAGIAPTIPAPFAATTPAVSADWDSVAPGATDDWGAEPAAPSSDWGTAVTMQEQAKPSTDWA
NVEC200_012734_1.1	GF	AGDDAPRAVFPSIV	GRP	MDDDVAALVIDNGSGMCKAGFAGDDAPRAVFPSIVGRPRHQGVMVGMGQKDSYVGDEAQSKRGILTLKYPIEHGIVTNWDDMEKVHIKYSTISNPLCEVMVIFLLDLASYILQRASCCPRRAPRSPNGGSPQP
NVEC200_012735_1.1	GF	AGDDAPRAVFPSIV	GRP	MEDDEIAALVVDNGSGMCKAGFAGDDAPRAVFPSIVGRPRHQGVMVGMGQKDSYVGDEAQSKRGILTLKYPIEHGIVTNWDDMEKIWHHTFYNELRVAPEEHPVLLTEAPLNPKANREKMTQIMFETFNSPAMYVAIQAVLSLYASGRTTGIVMDSGDGVTHTVPIYEGYALPHAIIRLDLAGRDLTDYLMKILTERGYSFTTTAEREIVRDIKEKLCYVALDFEQEMETAASSSSLEKSYELPDGQVITIGNERFRCPEAMFQPSFLGMESAGIHETTYNSIMKCDVDIRKDLYANTVLSGGSTMYPGIADRMQKEITSLAPPTMKIKIIAPPERKYSVWIGGSILASLSTFQQMWISKQEYDESGPSIVHRKCF
NVEC200_013180_1.1	GF	AGDDAPRAVFPSIV	GRP	MEDDVAALVVDNGSGMCKAGFAGDDAPRAVFPSIVGRPRHQGVMVGMGQKDSYVGDEAQSKRGILTLKYPIEHGIVTNWDDMEKIWHHTFYNELRVAPEEHPVLLTEAPLNPKANREKMTQIMFETFNSPAMYVAIQAVLSLYASGRTTGIVMDSGDGVTHTVPIYEGYALPHAILRLDLAGRDLTDYLMKILTERGYSFTTTAEREIVRDIKEKLAYVALDFEQEMATAAASSSLEKSYELPDGQVITIGNERFRCPEAMFQPSFLGMESAGIHETTYNSIMKCDVDIRKDLYANTVLSGGSTMFPGIADRMQKEISALAPPTMKIKIIAPPERKYSVWIGGSILASLSTFQQMWISKQEYDESGPSIVHRKCF
NVEC200_013206_1.1	EG	ASDEKRDSKQPPIDLSPAAYFHIR	GKR	MRLYLFVPVFALVLAVEGASDEKRDSKQPPIDLSPAAYFHIRGKRTHNAPPLDLSGPAYFHIRGKRTAKQPPYLDLGEPSFFHIRGKRTEGPPYIDLTEPSFFHIRGKRSSEQPPLDLGPAYFHIRGKRTKNPPIDLGPAYFHIRGKRLSGEQPPYLDLTPAYFHIRGKRTQQPPMIDLSEPAFFHIRGRRAVEQPPYLDLTPSYFHIRGKRTEYPPFLELGQPSYFHIRGRRAEKTTKD
NVEC200_013206_1.1	AV	EQPPYLDLTPSYFHIR	GKR	MRLYLFVPVFALVLAVEGASDEKRDSKQPPIDLSPAAYFHIRGKRTHNAPPLDLSGPAYFHIRGKRTAKQPPYLDLGEPSFFHIRGKRTEGPPYIDLTEPSFFHIRGKRSSEQPPLDLGPAYFHIRGKRTKNPPIDLGPAYFHIRGKRLSGEQPPYLDLTPAYFHIRGKRTQQPPMIDLSEPAFFHIRGRRAVEQPPYLDLTPSYFHIRGKRTEYPPFLELGQPSYFHIRGRRAEKTTKD
NVEC200_013206_1.1	LS	GPAYFHIR	GKR	MRLYLFVPVFALVLAVEGASDEKRDSKQPPIDLSPAAYFHIRGKRTHNAPPLDLSGPAYFHIRGKRTAKQPPYLDLGEPSFFHIRGKRTEGPPYIDLTEPSFFHIRGKRSSEQPPLDLGPAYFHIRGKRTKNPPIDLGPAYFHIRGKRLSGEQPPYLDLTPAYFHIRGKRTQQPPMIDLSEPAFFHIRGRRAVEQPPYLDLTPSYFHIRGKRTEYPPFLELGQPSYFHIRGRRAEKTTKD
NVEC200_013206_1.1	RT	KNPPIDLGPAYFHIR	GKR	MRLYLFVPVFALVLAVEGASDEKRDSKQPPIDLSPAAYFHIRGKRTHNAPPLDLSGPAYFHIRGKRTAKQPPYLDLGEPSFFHIRGKRTEGPPYIDLTEPSFFHIRGKRSSEQPPLDLGPAYFHIRGKRTKNPPIDLGPAYFHIRGKRLSGEQPPYLDLTPAYFHIRGKRTQQPPMIDLSEPAFFHIRGRRAVEQPPYLDLTPSYFHIRGKRTEYPPFLELGQPSYFHIRGRRAEKTTKD
NVEC200_013206_1.1	TK	NPPIDLGPAYFHIRG	KR	MRLYLFVPVFALVLAVEGASDEKRDSKQPPIDLSPAAYFHIRGKRTHNAPPLDLSGPAYFHIRGKRTAKQPPYLDLGEPSFFHIRGKRTEGPPYIDLTEPSFFHIRGKRSSEQPPLDLGPAYFHIRGKRTKNPPIDLGPAYFHIRGKRLSGEQPPYLDLTPAYFHIRGKRTQQPPMIDLSEPAFFHIRGRRAVEQPPYLDLTPSYFHIRGKRTEYPPFLELGQPSYFHIRGRRAEKTTKD
NVEC200_013206_1.1	KR	SSEQPPLDLGPAYFHIRGKRTKNPPIDLGPAYFHIR	GKR	MRLYLFVPVFALVLAVEGASDEKRDSKQPPIDLSPAAYFHIRGKRTHNAPPLDLSGPAYFHIRGKRTAKQPPYLDLGEPSFFHIRGKRTEGPPYIDLTEPSFFHIRGKRSSEQPPLDLGPAYFHIRGKRTKNPPIDLGPAYFHIRGKRLSGEQPPYLDLTPAYFHIRGKRTQQPPMIDLSEPAFFHIRGRRAVEQPPYLDLTPSYFHIRGKRTEYPPFLELGQPSYFHIRGRRAEKTTKD
NVEC200_014051_1.1	LE	SPNKLPTFNL	Precursor end	MKYILVTGGVISGIGKGVISSSIGTMLKGCGLHVTSIKIDPYLNIDAGTFSPYEHGEVFVLDDGGEVDLDLGNYERFLDVTLHRNNNITTGKIYQEVIQKERNGDYLGKTVQVVPHITDAIQDWVRKVAEDPVEGKRVADVCIVELGGTIGDIEGMPFVEAFRQFQFNVGRENFCVVHVSLIPTPSATGEQKTKPTQNSVRELRGLGLSPDLIMCRCKYSVTEEVKKKISLFCHVSPDQVIDVHDCKSIYRVPLLLSQQGLVKFFAQRLNMMEMRSPKPRHFMVHWKELAEREERVLEEVKIGIVGKYTKLEDAYLSLLKALKHSTLHCNKKLNVVWVDAESLEKESQHSDPVKYHDAWQRLCGVDGILVPGGFGARGTEGKIAAAEWARTKNKPYLGV…
NVEC200_014058_1.1	TL	QAVSRKANALHDDLPLFGPKEGSGPNPREFTEEQLKAAKAKGALR	Precursor end	MSGYRPPARGFSKDAASKVDAKYPKELEGNARRWVETMYGDTVAWGEERPNQRPGETFAEPLRSGVILCKIANKIKSNAIPKIGESNKSFVMQENISKFLDFCERVLGLDRLNLFQTVDLFERQNVGMVITTLQAVSRKANALHDDLPLFGPKEGSGPNPREFTEEQLKAAKAKGALR
NVEC200_014078_1.1	AS	MPEQDANPQTRFDG	KK	MAPRPGTLLLLGILIQVLICTAKSTYKKEIADLLDDNKDTPQFWKGRFSDPQFWKGRFSDPQFWKGRFSDPQFWKGRFSDPQFWKGRFSDPQFWKGRFSDPQFWKGRFSDPQFWKGRFADELLNGGHHKHHHEEGEWKRTAGPGRFGREDQGRFGREDQGRFGREDQGRFGREDQGRFGREDQGRFGREDQGRFGREDQGRFGREDQGRFGREDQGRFGREDQGRFGREDQGRFGREDQGRFGREDQGRFGREDQGRFGREDQGRFGREDQGRFGREDQGRFGREDQGRFGREDQGRFGREDQGRFGREDQGRFGREDQGRFGREDQGRFGREDQGRFGRNKIARVIDLDQGRFGRTMDTATKKDTVASMPEQDANPQTRFDGKKRQAAKERSIEKKST…
NVEC200_014617_1.1	QF	APPQSIPATGFNFGS	Precursor end	MAENISRIQAFKNKGKDSSEMRRRRNEVSVQLRKSKRDENVLKRRNITDVDSTSPLKEHNNQHSVPIQILPLPVVVGNLQSGDDNLMFTSVQSVRKMLSKEKSPPIDDVINAGLIPMLVKLLDRFDLPLLQFEAAWALTNIASGTSEQTKAVQEGGAVPMFVKLLSSVHDNVAEQAVWALGNIAGDGPLMRNTVIACGALGPLLALIKPSTSIQFLRNVTWTLSNLCRNKNPPPDVTAVQQVLPAIARLILSDDKEVLADTCWALSYLTDGVNERIQLVLDSGVVPKLVELLGYPEVNVLTPALRAIGNIVTGRDDQTQAVIDTGALFYFRALLTHKKSNIIKEAAWAISNVTAGTAQQIQAVMDSGLVPLIVDILRRGDFKARKEAIWVITNYCSGAN…

## Sheet: Confident_LC-MS
PROPEPTIDE	PEPTIDE_SEQUENCE	PEPTIDE(PTM)	PTM	-10lgP	Mass	ppm	m/z	RT	Area Adult	Area Juvenile	Area Larvae	Area Mix	PROPEPTIDE_LENGTH	PEPTIDE_LENGTH
NVE2974	APPGNEEGEAGFIPWFS	APPGNEEGEAGFIPWFS(-.98)	Amidation	37.2	1802.83	-0.1	902.42	72.06	4349000	1720400	1087500	4048700	221	17
NVEC200_005035_1.1	APPGNEEGEARFIPWFS	APPGNEEGEARFIPWFS(-.98)	Amidation	53.33	1901.91	-0.7	951.96	66.94	1425400	1087000	577280	1541900	301	17
NVE2973	APPGNGEGEAGFIPWFS	APPGNGEGEAGFIPWFS(-.98)	Amidation	41.14	1730.81	-0.1	866.41	71.75	18108000	12501000	5705000	16695000	253	17
NVE2974	APPGNGEGEAGFIPWFS	APPGNGEGEAGFIPWFS(-.98)	Amidation	41.14	1730.81	-0.1	866.41	71.75	18108000	12501000	5705000	16695000	221	17
NVEC200_005035_1.1	APPGNGEGEAGFIPWFS	APPGNGEGEAGFIPWFS(-.98)	Amidation	41.14	1730.81	-0.1	866.41	71.75	18108000	12501000	5705000	16695000	301	17
NVE15069	APPLDLSGPAYFHIR	APPLDLSGPAYFHIR(-.98)	Amidation	55.81	1651.88	-1	551.635	59.72	381660000	264580000	35600000	134750000	213	15
NVE15069	APPLDLSGPAYFHIR	APPLDLSGPAYFHIR		50.19	1652.87	3.1	551.965	61.77	NA	0	38977	NA	213	15
Nvec_HIRamide	APPLDLSGPAYFHIR	APPLDLSGPAYFHIR(-.98)	Amidation	55.81	1651.88	-1	551.635	59.72	381660000	264580000	35600000	134750000	240	15
Nvec_HIRamide	APPLDLSGPAYFHIR	APPLDLSGPAYFHIR		50.19	1652.87	3.1	551.965	61.77	NA	0	38977	NA	240	15
NVEC200_013206_1.1	APPLDLSGPAYFHIR	APPLDLSGPAYFHIR(-.98)	Amidation	55.81	1651.88	-1	551.635	59.72	381660000	264580000	35600000	134750000	240	15
NVEC200_013206_1.1	APPLDLSGPAYFHIR	APPLDLSGPAYFHIR		50.19	1652.87	3.1	551.965	61.77	NA	0	38977	NA	240	15
NVEC200_005035_1.1	APPSGHNEAGFIPWFA	APPSGHNEAGFIPWFA(-.98)	Amidation	40.43	1695.82	-1.7	848.914	68.44	9005600	8941600	4701300	14181000	301	16
NVE2973	APPSTGEGEAGFIPWFS	APPSTGEGEAGFIPWFS(-.98)	Amidation	46.06	1747.82	0.5	874.918	72.3	5261200	3887900	1684500	732090	253	17
NVE2974	APPSTGEGEAGFIPWFS	APPSTGEGEAGFIPWFS(-.98)	Amidation	46.06	1747.82	0.5	874.918	72.3	5261200	3887900	1684500	732090	221	17
NVEC200_005035_1.1	APPSTGEGEAGFIPWFS	APPSTGEGEAGFIPWFS(-.98)	Amidation	46.06	1747.82	0.5	874.918	72.3	5261200	3887900	1684500	732090	301	17
NVE15069	AVEQPPYLDLTPSYFHIR	AVEQPPYLDLTPSYFHIR(-.98)	Amidation	50.75	2144.11	0.4	715.709	65.77	NA	660360	1107100	2647400	213	18
Nvec_HIRamide	AVEQPPYLDLTPSYFHIR	AVEQPPYLDLTPSYFHIR(-.98)	Amidation	50.75	2144.11	0.4	715.709	65.77	NA	660360	1107100	2647400	240	18
NVEC200_013206_1.1	AVEQPPYLDLTPSYFHIR	AVEQPPYLDLTPSYFHIR(-.98)	Amidation	50.75	2144.11	0.4	715.709	65.77	NA	660360	1107100	2647400	240	18
NVE15666	DAPQSDLKKMF	DAPQSDLKKMF		39.1	1278.63	1	640.322	49.09	433970	487810	49131	43749	234	11
NVE12742	DEPGPPMIKIPVRH	DEPGPPMIKIPVRH(-.98)	Amidation	55.44	1583.86	2.4	396.973	47.87	NA	NA	391860	2156900	70	14
NVEC200_002800_1.1|Nvec_VRHamide	DEPGPPMIKIPVRH	DEPGPPMIKIPVRH(-.98)	Amidation	55.44	1583.86	2.4	396.973	47.87	NA	NA	391860	2156900	121	14
NVE15069	DSKQPPIDLSPAAYFHIR	DSKQPPIDLSPAAYFHIR(-.98)	Amidation	46.98	2053.07	4.4	514.278	62.51	NA	NA	89782	238720	213	18
Nvec_HIRamide	DSKQPPIDLSPAAYFHIR	DSKQPPIDLSPAAYFHIR(-.98)	Amidation	46.98	2053.07	4.4	514.278	62.51	NA	NA	89782	238720	240	18
NVEC200_013206_1.1	DSKQPPIDLSPAAYFHIR	DSKQPPIDLSPAAYFHIR(-.98)	Amidation	46.98	2053.07	4.4	514.278	62.51	NA	NA	89782	238720	240	18
NVEC200_005035_1.1	DTTKAAVQNDLVPPSKGAGEQGFIPWFS	DTTKAAVQNDLVPPSKGAGEQGFIPWFS(-.98)	Amidation	51.11	2958.49	-4.3	1480.24	68.15	7763300	5754600	NA	1693400	301	28
NVE2973	EFEPKNALQNDNAPPGNGEGEAGFIPWFS	EFEPKNALQNDNAPPGNGEGEAGFIPWFS(-.98)	Amidation	45.37	3130.44	-1.5	1566.23	70.8	13936000	11405000	NA	NA	253	29
NVE2974	EFEPKNALQNDNAPPGNGEGEAGFIPWFS	EFEPKNALQNDNAPPGNGEGEAGFIPWFS(-.98)	Amidation	45.37	3130.44	-1.5	1566.23	70.8	13936000	11405000	NA	NA	221	29
NVEC200_005035_1.1	EFEPKNALQNDNAPPGNGEGEAGFIPWFS	EFEPKNALQNDNAPPGNGEGEAGFIPWFS(-.98)	Amidation	45.37	3130.44	-1.5	1566.23	70.8	13936000	11405000	NA	NA	301	29
NVE4601	EIPPQGFRFNQW	EIPPQGFRFNQW(-.98)	Amidation	32.7	1516.76	-2.3	759.384	59.32	6983600	5383600	2761600	3347700	238	12
Nvec_QWamide	EIPPQGFRFNQW	EIPPQGFRFNQW(-.98)	Amidation	32.7	1516.76	-2.3	759.384	59.32	6983600	5383600	2761600	3347700	325	12
NVEC200_009895_1.1	EIPPQGFRFNQW	EIPPQGFRFNQW(-.98)	Amidation	32.7	1516.76	-2.3	759.384	59.32	6983600	5383600	2761600	3347700	294	12
NVE4601	EIPPQGLRFNQW	EIPPQGLRFNQW(-.98)	Amidation	39.24	1482.77	-1.6	742.393	57.72	8913300	6760400	3232500	10138000	238	12
Nvec_QWamide	EIPPQGLRFNQW	EIPPQGLRFNQW(-.98)	Amidation	39.24	1482.77	-1.6	742.393	57.72	8913300	6760400	3232500	10138000	325	12
NVEC200_009895_1.1	EIPPQGLRFNQW	EIPPQGLRFNQW(-.98)	Amidation	39.24	1482.77	-1.6	742.393	57.72	8913300	6760400	3232500	10138000	294	12
NVE4601	EIPPQGLRFSQW	EIPPQGLRFSQW(-.98)	Amidation	29.49	1455.76	-0.4	728.888	58.42	2689100	2263300	0	3652600	238	12
Nvec_QWamide	EIPPQGLRFSQW	EIPPQGLRFSQW(-.98)	Amidation	29.49	1455.76	-0.4	728.888	58.42	2689100	2263300	0	3652600	325	12
NVEC200_009895_1.1	EIPPQGLRFSQW	EIPPQGLRFSQW(-.98)	Amidation	29.49	1455.76	-0.4	728.888	58.42	2689100	2263300	0	3652600	294	12
NVEC200_004847_1.1	EIYEWIKTLH	EIYEWIKTLH		34.7	1330.69	0.4	666.354	58.03	NA	NA	31168	NA	240	10
NVE13213	EKLEEITGFAKMKKPYSS	EKLEEITGFAKMKKPYSS		36.06	2085.08	1.3	522.278	48.09	NA	NA	NA	91881	186	18
NVEC200_005515_1.1	EKLEEITGFAKMKKPYSS	EKLEEITGFAKMKKPYSS		36.06	2085.08	1.3	522.278	48.09	NA	NA	NA	91881	175	18
NVE15069	EPAFFHIR	EPAFFHIR(-.98)	Amidation	34.53	1014.54	2.9	508.279	48.28	643480	939580	NA	NA	213	8
Nvec_HIRamide	EPAFFHIR	EPAFFHIR(-.98)	Amidation	34.53	1014.54	2.9	508.279	48.28	643480	939580	NA	NA	240	8
NVEC200_013206_1.1	EPAFFHIR	EPAFFHIR(-.98)	Amidation	34.53	1014.54	2.9	508.279	48.28	643480	939580	NA	NA	240	8
NVE12742	EPGPPMIKIPVRH	E(-18.01)PGPPMIKIPVRH(-.98)	Pyro-glu from E; Amidation	45.58	1450.82	1.2	363.714	46.21	NA	NA	166260	1155500	70	13
NVE12742	EPGPPMIKIPVRH	EPGPPMIKIPVRH(-.98)	Amidation	48.56	1468.83	-1.8	735.423	46.23	NA	NA	6325000	36916000	70	13
NVE12742	EPGPPMIKIPVRH	EPGPPM(+15.99)IKIPVRH(-.98)	Oxidation (M); Amidation	47.77	1484.83	0.5	372.215	43.67	NA	NA	460750	3345200	70	13
NVEC200_002800_1.1|Nvec_VRHamide	EPGPPMIKIPVRH	E(-18.01)PGPPMIKIPVRH(-.98)	Pyro-glu from E; Amidation	45.58	1450.82	1.2	363.714	46.21	NA	NA	166260	1155500	121	13
NVEC200_002800_1.1|Nvec_VRHamide	EPGPPMIKIPVRH	EPGPPMIKIPVRH(-.98)	Amidation	48.56	1468.83	-1.8	735.423	46.23	NA	NA	6325000	36916000	121	13
NVEC200_002800_1.1|Nvec_VRHamide	EPGPPMIKIPVRH	EPGPPM(+15.99)IKIPVRH(-.98)	Oxidation (M); Amidation	47.77	1484.83	0.5	372.215	43.67	NA	NA	460750	3345200	121	13
NVE12742	EPGPPMIKIPVRHG	EPGPPMIKIPVRHG		38.77	1526.84	1.5	509.954	48.2	NA	NA	25445	507160	70	14
NVEC200_002800_1.1|Nvec_VRHamide	EPGPPMIKIPVRHG	EPGPPMIKIPVRHG		38.77	1526.84	1.5	509.954	48.2	NA	NA	25445	507160	121	14
NVE15069	EPSFFHIR	EPSFFHIR(-.98)	Amidation	33.05	1030.53	3.3	516.276	48.18	1328500	1559600	0	108450	213	8
Nvec_HIRamide	EPSFFHIR	EPSFFHIR(-.98)	Amidation	33.05	1030.53	3.3	516.276	48.18	1328500	1559600	0	108450	240	8
NVEC200_013206_1.1	EPSFFHIR	EPSFFHIR(-.98)	Amidation	33.05	1030.53	3.3	516.276	48.18	1328500	1559600	0	108450	240	8
NVE3755	FPPGFHRP	FPPGFHRP(-.98)	Amidation	28.53	952.503	3.6	477.261	39.13	NA	NA	2457900	4888700	78	8
Nvec_RPamide_EDO37503.p1	FPPGFHRP	FPPGFHRP(-.98)	Amidation	28.53	952.503	3.6	477.261	39.13	NA	NA	2457900	4888700	85	8
NVEC200_002806_1.1	FPPGFHRP	FPPGFHRP(-.98)	Amidation	28.53	952.503	3.6	477.261	39.13	NA	NA	2457900	4888700	112	8
NVE15069	GEPSFFHIR	GEPSFFHIR(-.98)	Amidation	34.83	1087.56	0.4	363.526	48.46	448920	161690	NA	425310	213	9
Nvec_HIRamide	GEPSFFHIR	GEPSFFHIR(-.98)	Amidation	34.83	1087.56	0.4	363.526	48.46	448920	161690	NA	425310	240	9
NVEC200_013206_1.1	GEPSFFHIR	GEPSFFHIR(-.98)	Amidation	34.83	1087.56	0.4	363.526	48.46	448920	161690	NA	425310	240	9
NVE21167	GFDIPIQA	GFDIPIQA		32.09	859.444	0.3	430.729	60.38	645470	924040	232510	752620	263	8
NVEC200_002800_1.1|Nvec_VRHamide	GGPPPIYLPVRP	GGPPPIYLPVRP(-.98)	Amidation	50.71	1260.73	0.8	631.375	58.27	30020	35576	725040	1312100	121	12
NVE339	GPLRIMPIS	GPLRIMPIS		35.88	982.563	0.6	492.289	56.38	560000	509490	1772100	5189400	219	9
NVE339	GPLRIMPIS	GPLRIM(+15.99)PIS	Oxidation (M)	23.54	998.558	0.9	500.287	49.03	NA	NA	NA	347840	219	9
NVE8927	GPLVHGLVKEAETGAKVEHW	GPLVHGLVKEAETGAKVEHW		57.56	2156.14	0.5	719.72	50.68	NA	NA	2015100	3714700	178	20
NVE12742	GPPMIKIPVRH	GPPM(+15.99)IKIPVRH(-.98)	Oxidation (M); Amidation	24.1	1258.73	1.4	420.586	45.01	NA	160610	NA	NA	70	11
NVE12742	GPPMIKIPVRH	GPPMIKIPVRH(-.98)	Amidation	47.07	1242.74	-0.9	415.253	46.34	1951500	15621000	5414500	440460	70	11
NVEC200_002800_1.1|Nvec_VRHamide	GPPMIKIPVRH	GPPM(+15.99)IKIPVRH(-.98)	Oxidation (M); Amidation	24.1	1258.73	1.4	420.586	45.01	NA	160610	NA	NA	121	11
NVEC200_002800_1.1|Nvec_VRHamide	GPPMIKIPVRH	GPPMIKIPVRH(-.98)	Amidation	47.07	1242.74	-0.9	415.253	46.34	1951500	15621000	5414500	440460	121	11
HADP01262889.1	GPPQGLRW	GPPQGLRW(-.98)	Amidation	30.54	908.498	0.4	455.257	44.41	6805000	26414000	12288000	3881900	71	8
HADP01262889.1	GPPQGLRW	GPPQGLRW		21.81	909.482	-0.5	455.748	48.33	NA	1132700	NA	NA	71	8
NVE2302	GPPQGLRW	GPPQGLRW(-.98)	Amidation	30.54	908.498	0.4	455.257	44.41	6805000	26414000	12288000	3881900	66	8
NVE2302	GPPQGLRW	GPPQGLRW		21.81	909.482	-0.5	455.748	48.33	NA	1132700	NA	NA	66	8
NVE24308	GPPQGLRW	GPPQGLRW(-.98)	Amidation	30.54	908.498	0.4	455.257	44.41	6805000	26414000	12288000	3881900	57	8
NVE24308	GPPQGLRW	GPPQGLRW		21.81	909.482	-0.5	455.748	48.33	NA	1132700	NA	NA	57	8
NVE15069	GPPYIDLTEPSFFHIR	GPPYIDLTEPSFFHIR(-.98)	Amidation	53.54	1886.97	-1.6	944.49	67.92	479690000	349510000	37529000	93222000	213	16
NVE15069	GPPYIDLTEPSFFHIR	GPPYIDLTEPSFFHIR		37.63	1887.95	2.1	630.326	69.25	NA	NA	70530	NA	213	16
Nvec_HIRamide	GPPYIDLTEPSFFHIR	GPPYIDLTEPSFFHIR(-.98)	Amidation	53.54	1886.97	-1.6	944.49	67.92	479690000	349510000	37529000	93222000	240	16
Nvec_HIRamide	GPPYIDLTEPSFFHIR	GPPYIDLTEPSFFHIR		37.63	1887.95	2.1	630.326	69.25	NA	NA	70530	NA	240	16
NVEC200_013206_1.1	GPPYIDLTEPSFFHIR	GPPYIDLTEPSFFHIR(-.98)	Amidation	53.54	1886.97	-1.6	944.49	67.92	479690000	349510000	37529000	93222000	240	16
NVEC200_013206_1.1	GPPYIDLTEPSFFHIR	GPPYIDLTEPSFFHIR		37.63	1887.95	2.1	630.326	69.25	NA	NA	70530	NA	240	16
NVE24307|HADP01080760.1	HPKLSPLMKEYL	HPKLSPLMKEYL		45.23	1454.8	-0.9	728.404	51.07	2121600	1648900	607710	1877200	69	12
NVE4601	IPPQGFRFNQW	IPPQGFRFNQW(-.98)	Amidation	39.24	1387.71	-0.8	694.864	57.35	96682000	69642000	44009000	48471000	238	11
Nvec_QWamide	IPPQGFRFNQW	IPPQGFRFNQW(-.98)	Amidation	39.24	1387.71	-0.8	694.864	57.35	96682000	69642000	44009000	48471000	325	11
NVEC200_009895_1.1	IPPQGFRFNQW	IPPQGFRFNQW(-.98)	Amidation	39.24	1387.71	-0.8	694.864	57.35	96682000	69642000	44009000	48471000	294	11
NVEC200_009895_1.1	IPPQGFRFNQWE	IPPQGFRFNQWE		39.69	1517.74	-0.6	759.878	58.21	1447000	914860	1024400	1824900	294	12
NVE4601	IPPQGLRFNQW	IPPQGLRFNQW(-.98)	Amidation	38.33	1353.73	0.9	677.873	55.86	138770000	84874000	47645000	140500000	238	11
Nvec_QWamide	IPPQGLRFNQW	IPPQGLRFNQW(-.98)	Amidation	38.33	1353.73	0.9	677.873	55.86	138770000	84874000	47645000	140500000	325	11
NVEC200_009895_1.1	IPPQGLRFNQW	IPPQGLRFNQW(-.98)	Amidation	38.33	1353.73	0.9	677.873	55.86	138770000	84874000	47645000	140500000	294	11
NVE23858	IPPVPLI	IPPVPLI		21.98	747.489	-0.4	374.752	67.95	4961400	NA	NA	NA	679	7
NVE4012|Nvec_XP_032233649.1	IPSDDDQLMFRP	IPSDDDQLMFRP(-.98)	Amidation	42.83	1431.68	1	716.849	51.51	233730	153070	321720	110310	269	12
NVE24307|HADP01080760.1	KLSPLMKEYL	KLSPLMKEYL		37.32	1220.68	-0.3	611.349	53.02	601520	309350	NA	185440	69	10
NVE13034	KPPPTWPLWP	KPPPTWPLWP		27.9	1217.66	-0.3	609.837	68.4	1631700	0	NA	NA	286	10
NVE18122	KPPPTWPLWP	KPPPTWPLWP		27.9	1217.66	-0.3	609.837	68.4	1631700	0	NA	NA	300	10
NVE15069	KQPPIDLSPAAYFHIR	KQPPIDLSPAAYFHIR(-.98)	Amidation	44.44	1851.02	1.8	463.762	60.43	48842	170500	0	413570	213	16
Nvec_HIRamide	KQPPIDLSPAAYFHIR	KQPPIDLSPAAYFHIR(-.98)	Amidation	44.44	1851.02	1.8	463.762	60.43	48842	170500	0	413570	240	16
NVEC200_013206_1.1	KQPPIDLSPAAYFHIR	KQPPIDLSPAAYFHIR(-.98)	Amidation	44.44	1851.02	1.8	463.762	60.43	48842	170500	0	413570	240	16
NVE15069	KQPPYLDLGEPSFFHIR	KQPPYLDLGEPSFFHIR(-.98)	Amidation	44.3	2042.07	-0.4	681.698	63.07	NA	NA	67688	208140	213	17
Nvec_HIRamide	KQPPYLDLGEPSFFHIR	KQPPYLDLGEPSFFHIR(-.98)	Amidation	44.3	2042.07	-0.4	681.698	63.07	NA	NA	67688	208140	240	17
NVEC200_013206_1.1	KQPPYLDLGEPSFFHIR	KQPPYLDLGEPSFFHIR(-.98)	Amidation	44.3	2042.07	-0.4	681.698	63.07	NA	NA	67688	208140	240	17
NVE15069	LGPAYFHIR	LGPAYFHIR(-.98)	Amidation	35.8	1071.6	0.7	358.207	48.43	813430	1444400	NA	NA	213	9
Nvec_HIRamide	LGPAYFHIR	LGPAYFHIR(-.98)	Amidation	35.8	1071.6	0.7	358.207	48.43	813430	1444400	NA	NA	240	9
NVEC200_013206_1.1	LGPAYFHIR	LGPAYFHIR(-.98)	Amidation	35.8	1071.6	0.7	358.207	48.43	813430	1444400	NA	NA	240	9
NVE11386	LPNDALEEESEVAEKSPL	LPNDALEEESEVAEKSPL		57.87	1968.95	-1.2	985.482	55.92	201950	102660	2026200	3872000	92	18
NVE15069	LSGEQPPYLDLTPAYFHIR	LSGEQPPYLDLTPAYFHIR(-.98)	Amidation	55.71	2215.14	-1.4	739.387	67.12	489660	661380	912790	1559900	213	19
Nvec_HIRamide	LSGEQPPYLDLTPAYFHIR	LSGEQPPYLDLTPAYFHIR(-.98)	Amidation	55.71	2215.14	-1.4	739.387	67.12	489660	661380	912790	1559900	240	19
NVEC200_013206_1.1	LSGEQPPYLDLTPAYFHIR	LSGEQPPYLDLTPAYFHIR(-.98)	Amidation	55.71	2215.14	-1.4	739.387	67.12	489660	661380	912790	1559900	240	19
NVE15069	LSPAAYFHIR	LSPAAYFHIR(-.98)	Amidation	32.91	1172.65	-0.3	391.889	52.2	565890	940160	NA	NA	213	10
Nvec_HIRamide	LSPAAYFHIR	LSPAAYFHIR(-.98)	Amidation	32.91	1172.65	-0.3	391.889	52.2	565890	940160	NA	NA	240	10
NVEC200_013206_1.1	LSPAAYFHIR	LSPAAYFHIR(-.98)	Amidation	32.91	1172.65	-0.3	391.889	52.2	565890	940160	NA	NA	240	10
NVE15069	LTPAYFHIR	LTPAYFHIR(-.98)	Amidation	34.37	1115.62	-1.6	372.881	47.07	2821700	3166400	NA	290030	213	9
Nvec_HIRamide	LTPAYFHIR	LTPAYFHIR(-.98)	Amidation	34.37	1115.62	-1.6	372.881	47.07	2821700	3166400	NA	290030	240	9
NVEC200_013206_1.1	LTPAYFHIR	LTPAYFHIR(-.98)	Amidation	34.37	1115.62	-1.6	372.881	47.07	2821700	3166400	NA	290030	240	9
NVE15069	LTPSYFHIR	LTPSYFHIR(-.98)	Amidation	31.39	1131.62	-1.2	378.213	46.14	1742000	3087700	NA	249510	213	9
Nvec_HIRamide	LTPSYFHIR	LTPSYFHIR(-.98)	Amidation	31.39	1131.62	-1.2	378.213	46.14	1742000	3087700	NA	249510	240	9
NVEC200_013206_1.1	LTPSYFHIR	LTPSYFHIR(-.98)	Amidation	31.39	1131.62	-1.2	378.213	46.14	1742000	3087700	NA	249510	240	9
NVE1473	NPPQPPFRIPI	NPPQPPFRIPI(-.98)	Amidation	39.97	1273.73	-1.6	637.871	63.17	2081000	1182400	NA	276620	202	11
NVE12742	PMIKIPVRH	PMIKIPVRH(-.98)	Amidation	35.07	1088.66	0.8	363.896	42.83	NA	236490	62616	NA	70	9
NVEC200_002800_1.1|Nvec_VRHamide	PMIKIPVRH	PMIKIPVRH(-.98)	Amidation	35.07	1088.66	0.8	363.896	42.83	NA	236490	62616	NA	121	9
NVE3755	PPGFHRP	PPGFHRP(-.98)	Amidation	23.55	805.435	2.1	403.726	39.1	NA	NA	NA	139870	78	7
Nvec_RPamide_EDO37503.p1	PPGFHRP	PPGFHRP(-.98)	Amidation	23.55	805.435	2.1	403.726	39.1	NA	NA	NA	139870	85	7
NVEC200_002806_1.1	PPGFHRP	PPGFHRP(-.98)	Amidation	23.55	805.435	2.1	403.726	39.1	NA	NA	NA	139870	112	7
NVEC200_002800_1.1|Nvec_VRHamide	PPPIYLPVRP	PPPIYLPVRP(-.98)	Amidation	25.87	1146.69	-0.8	574.352	57.51	NA	NA	130380	18735	121	10
NVE9858	QAGAPGLW	Q(-17.03)AGAPGLW(-.98)	Pyro-glu from Q; Amidation	28.08	780.392	-1.2	781.398	55.04	8622300	NA	NA	NA	296	8
Nvec_GLWamide	QAGAPGLW	Q(-17.03)AGAPGLW(-.98)	Pyro-glu from Q; Amidation	28.08	780.392	-1.2	781.398	55.04	8622300	NA	NA	NA	347	8
NVEC200_000296_1.1	QAGAPGLW	Q(-17.03)AGAPGLW(-.98)	Pyro-glu from Q; Amidation	28.08	780.392	-1.2	781.398	55.04	8622300	NA	NA	NA	419	8
NVE9858	QAGPPGLW	Q(-17.03)AGPPGLW(-.98)	Pyro-glu from Q; Amidation	27.58	806.408	-0.3	404.211	57.41	6905600	971040	744000	1100900	296	8
Nvec_GLWamide	QAGPPGLW	Q(-17.03)AGPPGLW(-.98)	Pyro-glu from Q; Amidation	27.58	806.408	-0.3	404.211	57.41	6905600	971040	744000	1100900	347	8
NVEC200_000296_1.1	QAGPPGLW	Q(-17.03)AGPPGLW(-.98)	Pyro-glu from Q; Amidation	27.58	806.408	-0.3	404.211	57.41	6905600	971040	744000	1100900	419	8
NVEC200_010517_1.1	QAKLNKGWESANYDKGWA	Q(-17.03)AKLNKGWESANYDKGWA	Pyro-glu from Q	60.98	2047.98	0.9	683.666	48.96	6306200	5447800	350400	3192500	282	18
NVE6636	QAMQWGHKGWA	Q(-17.03)AMQWGHKGWA	Pyro-glu from Q	48.76	1281.57	-1.3	641.792	50.07	13719000	12153000	1011200	9737900	158	11
NVE6636	QAMQWGHKGWA	Q(-17.03)AM(+15.99)QWGHKGWA	Pyro-glu from Q; Oxidation (M)	41.35	1297.57	0.5	649.791	43.58	1111400	NA	NA	799370	158	11
NVEC200_010517_1.1	QAMQWGHKGWA	Q(-17.03)AMQWGHKGWA	Pyro-glu from Q	48.76	1281.57	-1.3	641.792	50.07	13719000	12153000	1011200	9737900	282	11
NVEC200_010517_1.1	QAMQWGHKGWA	Q(-17.03)AM(+15.99)QWGHKGWA	Pyro-glu from Q; Oxidation (M)	41.35	1297.57	0.5	649.791	43.58	1111400	NA	NA	799370	282	11
NVE4853	QAVNNPFL	QAVNNPFL		33.71	901.466	-0.8	902.472	54.57	NA	NA	1350000	NA	540	8
NVE3755	QDAFLPKPRP	Q(-17.03)DAFLPKPRP(-.98)	Pyro-glu from Q; Amidation	48.51	1149.63	0.5	575.822	47	15588000	9980900	7762800	22774000	78	10
Nvec_RPamide_EDO37503.p1	QDAFLPKPRP	Q(-17.03)DAFLPKPRP(-.98)	Pyro-glu from Q; Amidation	48.51	1149.63	0.5	575.822	47	15588000	9980900	7762800	22774000	85	10
NVEC200_002806_1.1	QDAFLPKPRP	Q(-17.03)DAFLPKPRP(-.98)	Pyro-glu from Q; Amidation	48.51	1149.63	0.5	575.822	47	15588000	9980900	7762800	22774000	112	10
NVE3755	QDAFLPKPRPG	Q(-17.03)DAFLPKPRPG	Pyro-glu from Q	42.05	1207.63	0.4	604.825	47.84	NA	NA	69373	238460	78	11
Nvec_RPamide_EDO37503.p1	QDAFLPKPRPG	Q(-17.03)DAFLPKPRPG	Pyro-glu from Q	42.05	1207.63	0.4	604.825	47.84	NA	NA	69373	238460	85	11
NVEC200_002806_1.1	QDAFLPKPRPG	Q(-17.03)DAFLPKPRPG	Pyro-glu from Q	42.05	1207.63	0.4	604.825	47.84	NA	NA	69373	238460	112	11
Nvec_RPamide_EDO37503.p1	QDSSNYEFPPGFHRP	Q(-17.03)DSSNYEFPPGFHRP(-.98)	Pyro-glu from Q; Amidation	53.76	1758.78	2.3	880.397	51.51	3840700	1934100	784240	5428800	85	15
NVEC200_002806_1.1	QDSSNYEFPPGFHRP	Q(-17.03)DSSNYEFPPGFHRP(-.98)	Pyro-glu from Q; Amidation	53.76	1758.78	2.3	880.397	51.51	3840700	1934100	784240	5428800	112	15
NVE4012|Nvec_XP_032233649.1	QESADTPSIFRP	QESADTPSIFRP(-.98)	Amidation	36.31	1345.66	-0.5	673.838	52.13	4271000	NA	1586000	3359000	269	12
NVE4012|Nvec_XP_032233649.1	QESADTPSIFRP	Q(-17.03)ESADTPSIFRP(-.98)	Pyro-glu from Q; Amidation	48.68	1328.64	-0.5	665.325	52.19	5660600	4282400	2039300	4833900	269	12
NVE4012|Nvec_XP_032233649.1	QESADTPSIFRP	QESADTPSIFRP		35.8	1346.65	0.2	674.331	55.49	286230	79417	23456	39478	269	12
NVE4012|Nvec_XP_032233649.1	QESADTPSIFRP	Q(-17.03)ESADTPSIFRP	Pyro-glu from Q	45.13	1329.62	0.7	665.818	55.47	355170	267570	NA	70464	269	12
HADP01262889.1	QESSAGPPQGLRW	QESSAGPPQGLRW(-.98)	Amidation	31.95	1410.7	0.6	706.358	50.26	62301	NA	NA	NA	71	13
HADP01262889.1	QESSAGPPQGLRW	Q(-17.03)ESSAGPPQGLRW(-.98)	Pyro-glu from Q; Amidation	44.61	1393.67	-2.6	697.842	50.26	56831	44505	NA	NA	71	13
NVE2302	QESSAGPPQGLRW	QESSAGPPQGLRW(-.98)	Amidation	31.95	1410.7	0.6	706.358	50.26	62301	NA	NA	NA	66	13
NVE2302	QESSAGPPQGLRW	Q(-17.03)ESSAGPPQGLRW(-.98)	Pyro-glu from Q; Amidation	44.61	1393.67	-2.6	697.842	50.26	56831	44505	NA	NA	66	13
NVE24308	QESSAGPPQGLRW	QESSAGPPQGLRW(-.98)	Amidation	31.95	1410.7	0.6	706.358	50.26	62301	NA	NA	NA	57	13
NVE24308	QESSAGPPQGLRW	Q(-17.03)ESSAGPPQGLRW(-.98)	Pyro-glu from Q; Amidation	44.61	1393.67	-2.6	697.842	50.26	56831	44505	NA	NA	57	13
NVE8232	QETDGESLKKAEEEFV	Q(-17.03)ETDGESLKKAEEEFV	Pyro-glu from Q	51.34	1820.83	-1.4	911.422	54.68	174610	156370	NA	388840	104	16
NVE12918|HADO01001257.1	QFNEGSVAEEEA	Q(-17.03)FNEGSVAEEEA	Pyro-glu from Q	31.1	1291.52	1.4	646.768	46.65	1220100	NA	914480	1492400	77	12
NVE4012|Nvec_XP_032233649.1	QGLMFRP	Q(-17.03)GLMFRP(-.98)	Pyro-glu from Q; Amidation	30.7	829.427	-0.5	415.721	53.93	14556000	14105000	11483000	26961000	269	7
NVE4012|Nvec_XP_032233649.1	QGLMFRP	Q(-17.03)GLM(+15.99)FRP(-.98)	Pyro-glu from Q; Oxidation (M); Amidation	24.89	845.422	-0.2	423.718	47.84	3294000	NA	674330	3999500	269	7
NVE4012|Nvec_XP_032233649.1	QGLMFRP	Q(-17.03)GLMFRP	Pyro-glu from Q	29.93	830.411	-1.1	416.212	58.07	NA	NA	0	378980	269	7
NVE4012|Nvec_XP_032233649.1	QGLMFRP	QGLMFRP(-.98)	Amidation	26.17	846.453	-0.5	424.234	53.93	767960	482180	583700	1361500	269	7
NVE26068	QGNEGYGVDSENAMIEQKTKVIA	Q(-17.03)GNEGYGVDSENAMIEQKTKVIA	Pyro-glu from Q	56.77	2463.16	-0.9	1232.59	52.53	75800	NA	141220	63152	123	23
NVE4012|Nvec_XP_032233649.1	QLMFRPGRNEEQLFRP	Q(-17.03)LMFRPGRNEEQLFRP(-.98)	Pyro-glu from Q; Amidation	45.05	1999.02	0.2	667.348	59.44	887530	NA	625600	955090	269	16
NVE22506	QMPNMVPFH	Q(-17.03)MPNM(+15.99)VPFH(-.98)	Pyro-glu from Q; Oxidation (M); Amidation	40.91	1097.48	-0.7	549.746	50.26	45537000	40367000	0	3162200	162	9
NVE22506	QMPNMVPFH	Q(-17.03)M(+15.99)PNMVPFH(-.98)	Pyro-glu from Q; Oxidation (M); Amidation	37.42	1097.48	1.1	549.747	50.76	NA	40367000	NA	3162200	162	9
NVE22506	QMPNMVPFH	Q(-17.03)MPNMVPFH(-.98)	Pyro-glu from Q; Amidation	46.36	1081.48	-1.2	541.749	59.42	142830000	171540000	4020400	15425000	162	9
NVE22506	QMPNMVPFH	QMPNMVPFH(-.98)	Amidation	35.22	1098.51	1.6	550.263	58.93	NA	28454000	NA	NA	162	9
NVE22506	QMPNMVPFH	QM(+15.99)PNMVPFH(-.98)	Oxidation (M); Amidation	36.34	1114.51	-1	558.259	50.25	6410000	NA	NA	0	162	9
NVE22506	QMPNMVPFH	Q(-17.03)MPNMVPFH	Pyro-glu from Q	34.86	1082.47	-0.9	542.241	60.81	43269	86431	NA	NA	162	9
NVE22506	QMPNMVPFH	QM(+15.99)PNM(+15.99)VPFH(-.98)	Oxidation (M); Amidation	33.93	1130.5	0.3	566.258	42.23	525510	476120	NA	NA	162	9
NVE22506	QMPNMVPFH	QMPNM(+15.99)VPFH(-.98)	Oxidation (M); Amidation	38.48	1114.51	-1	558.259	50.25	6410000	3145800	NA	NA	162	9
NVE15069	QPPIDLSPAAYFHIR	QPPIDLSPAAYFHIR(-.98)	Amidation	50.19	1722.92	-0.6	862.467	64.59	2299000	1840500	5343500	12140000	213	15
NVE15069	QPPIDLSPAAYFHIR	Q(-17.03)PPIDLSPAAYFHIR(-.98)	Pyro-glu from Q; Amidation	50.93	1705.89	0.8	569.639	70.89	274570000	248200000	23617000	98562000	213	15
NVE15069	QPPIDLSPAAYFHIR	Q(-17.03)PPIDLSPAAYFHIR	Pyro-glu from Q	38.79	1706.88	3.3	854.449	72.08	103690	80355	53128	NA	213	15
Nvec_HIRamide	QPPIDLSPAAYFHIR	QPPIDLSPAAYFHIR(-.98)	Amidation	50.19	1722.92	-0.6	862.467	64.59	2299000	1840500	5343500	12140000	240	15
Nvec_HIRamide	QPPIDLSPAAYFHIR	Q(-17.03)PPIDLSPAAYFHIR(-.98)	Pyro-glu from Q; Amidation	50.93	1705.89	0.8	569.639	70.89	274570000	248200000	23617000	98562000	240	15
Nvec_HIRamide	QPPIDLSPAAYFHIR	Q(-17.03)PPIDLSPAAYFHIR	Pyro-glu from Q	38.79	1706.88	3.3	854.449	72.08	103690	80355	53128	NA	240	15
NVEC200_013206_1.1	QPPIDLSPAAYFHIR	QPPIDLSPAAYFHIR(-.98)	Amidation	50.19	1722.92	-0.6	862.467	64.59	2299000	1840500	5343500	12140000	240	15
NVEC200_013206_1.1	QPPIDLSPAAYFHIR	Q(-17.03)PPIDLSPAAYFHIR(-.98)	Pyro-glu from Q; Amidation	50.93	1705.89	0.8	569.639	70.89	274570000	248200000	23617000	98562000	240	15
NVEC200_013206_1.1	QPPIDLSPAAYFHIR	Q(-17.03)PPIDLSPAAYFHIR	Pyro-glu from Q	38.79	1706.88	3.3	854.449	72.08	103690	80355	53128	NA	240	15
NVE15069	QPPLDLGPAYFHIR	Q(-17.03)PPLDLGPAYFHIR(-.98)	Pyro-glu from Q; Amidation	51.73	1604.85	-1.1	803.43	67.86	386050000	280860000	23560000	99167000	213	14
NVE15069	QPPLDLGPAYFHIR	QPPLDLGPAYFHIR(-.98)	Amidation	50.64	1621.87	2.6	541.633	60.62	2417500	2370200	0	11405000	213	14
Nvec_HIRamide	QPPLDLGPAYFHIR	Q(-17.03)PPLDLGPAYFHIR(-.98)	Pyro-glu from Q; Amidation	51.73	1604.85	-1.1	803.43	67.86	386050000	280860000	23560000	99167000	240	14
Nvec_HIRamide	QPPLDLGPAYFHIR	QPPLDLGPAYFHIR(-.98)	Amidation	50.64	1621.87	2.6	541.633	60.62	2417500	2370200	0	11405000	240	14
NVEC200_013206_1.1	QPPLDLGPAYFHIR	Q(-17.03)PPLDLGPAYFHIR(-.98)	Pyro-glu from Q; Amidation	51.73	1604.85	-1.1	803.43	67.86	386050000	280860000	23560000	99167000	240	14
NVEC200_013206_1.1	QPPLDLGPAYFHIR	QPPLDLGPAYFHIR(-.98)	Amidation	50.64	1621.87	2.6	541.633	60.62	2417500	2370200	0	11405000	240	14
NVE15069	QPPLDLGPAYFHIRG	Q(-17.03)PPLDLGPAYFHIRG	Pyro-glu from Q	44.5	1662.85	-0.8	832.433	67.87	82975	NA	NA	15550	213	15
Nvec_HIRamide	QPPLDLGPAYFHIRG	Q(-17.03)PPLDLGPAYFHIRG	Pyro-glu from Q	44.5	1662.85	-0.8	832.433	67.87	82975	NA	NA	15550	240	15
NVEC200_013206_1.1	QPPLDLGPAYFHIRG	Q(-17.03)PPLDLGPAYFHIRG	Pyro-glu from Q	44.5	1662.85	-0.8	832.433	67.87	82975	NA	NA	15550	240	15
NVE1038	QPPLSHLS	Q(-17.03)PPLSHLS(-.98)	Pyro-glu from Q; Amidation	28.11	859.455	-0.3	430.735	46.61	673080	450270	NA	NA	138	8
NVE15069	QPPMIDLSEPAFFHIR	Q(-17.03)PPMIDLSEPAFFHIR(-.98)	Pyro-glu from Q; Amidation	58.3	1878.95	-0.5	627.322	74.48	178110000	126690000	10805000	26769000	213	16
NVE15069	QPPMIDLSEPAFFHIR	Q(-17.03)PPMIDLSEPAFFHIR	Pyro-glu from Q	40.01	1879.93	3.6	940.975	75.65	NA	NA	11368	NA	213	16
NVE15069	QPPMIDLSEPAFFHIR	Q(-17.03)PPM(+15.99)IDLSEPAFFHIR(-.98)	Pyro-glu from Q; Oxidation (M); Amidation	53.98	1894.94	1.4	632.655	68.99	20857000	15290000	920890	2720800	213	16
NVE15069	QPPMIDLSEPAFFHIR	QPPMIDLSEPAFFHIR(-.98)	Amidation	47.62	1895.97	-1.2	948.992	67.65	1837600	NA	4755700	5869400	213	16
NVE15069	QPPMIDLSEPAFFHIR	QPPM(+15.99)IDLSEPAFFHIR(-.98)	Oxidation (M); Amidation	47.04	1911.97	0.7	638.33	64.37	68941	115790	416090	716470	213	16
Nvec_HIRamide	QPPMIDLSEPAFFHIR	Q(-17.03)PPMIDLSEPAFFHIR(-.98)	Pyro-glu from Q; Amidation	58.3	1878.95	-0.5	627.322	74.48	178110000	126690000	10805000	26769000	240	16
Nvec_HIRamide	QPPMIDLSEPAFFHIR	Q(-17.03)PPMIDLSEPAFFHIR	Pyro-glu from Q	40.01	1879.93	3.6	940.975	75.65	NA	NA	11368	NA	240	16
Nvec_HIRamide	QPPMIDLSEPAFFHIR	Q(-17.03)PPM(+15.99)IDLSEPAFFHIR(-.98)	Pyro-glu from Q; Oxidation (M); Amidation	53.98	1894.94	1.4	632.655	68.99	20857000	15290000	920890	2720800	240	16
Nvec_HIRamide	QPPMIDLSEPAFFHIR	QPPMIDLSEPAFFHIR(-.98)	Amidation	47.62	1895.97	-1.2	948.992	67.65	1837600	NA	4755700	5869400	240	16
Nvec_HIRamide	QPPMIDLSEPAFFHIR	QPPM(+15.99)IDLSEPAFFHIR(-.98)	Oxidation (M); Amidation	47.04	1911.97	0.7	638.33	64.37	68941	115790	416090	716470	240	16
NVEC200_013206_1.1	QPPMIDLSEPAFFHIR	Q(-17.03)PPMIDLSEPAFFHIR(-.98)	Pyro-glu from Q; Amidation	58.3	1878.95	-0.5	627.322	74.48	178110000	126690000	10805000	26769000	240	16
NVEC200_013206_1.1	QPPMIDLSEPAFFHIR	Q(-17.03)PPMIDLSEPAFFHIR	Pyro-glu from Q	40.01	1879.93	3.6	940.975	75.65	NA	NA	11368	NA	240	16
NVEC200_013206_1.1	QPPMIDLSEPAFFHIR	Q(-17.03)PPM(+15.99)IDLSEPAFFHIR(-.98)	Pyro-glu from Q; Oxidation (M); Amidation	53.98	1894.94	1.4	632.655	68.99	20857000	15290000	920890	2720800	240	16
NVEC200_013206_1.1	QPPMIDLSEPAFFHIR	QPPMIDLSEPAFFHIR(-.98)	Amidation	47.62	1895.97	-1.2	948.992	67.65	1837600	NA	4755700	5869400	240	16
NVEC200_013206_1.1	QPPMIDLSEPAFFHIR	QPPM(+15.99)IDLSEPAFFHIR(-.98)	Oxidation (M); Amidation	47.04	1911.97	0.7	638.33	64.37	68941	115790	416090	716470	240	16
NVE15069	QPPYLDLTPAYFHIR	QPPYLDLTPAYFHIR(-.98)	Amidation	49.86	1828.96	-0.5	915.488	64.79	2461000	3051300	6903200	10562000	213	15
NVE15069	QPPYLDLTPAYFHIR	Q(-17.03)PPYLDLTPAYFHIR(-.98)	Pyro-glu from Q; Amidation	52.95	1811.94	-1.8	906.973	71.84	322000000	230650000	13835000	65955000	213	15
NVE15069	QPPYLDLTPAYFHIR	Q(-17.03)PPYLDLTPAYFHIR	Pyro-glu from Q	23.37	1812.92	2.5	907.47	73.16	NA	NA	8294.2	NA	213	15
Nvec_HIRamide	QPPYLDLTPAYFHIR	QPPYLDLTPAYFHIR(-.98)	Amidation	49.86	1828.96	-0.5	915.488	64.79	2461000	3051300	6903200	10562000	240	15
Nvec_HIRamide	QPPYLDLTPAYFHIR	Q(-17.03)PPYLDLTPAYFHIR(-.98)	Pyro-glu from Q; Amidation	52.95	1811.94	-1.8	906.973	71.84	322000000	230650000	13835000	65955000	240	15
Nvec_HIRamide	QPPYLDLTPAYFHIR	Q(-17.03)PPYLDLTPAYFHIR	Pyro-glu from Q	23.37	1812.92	2.5	907.47	73.16	NA	NA	8294.2	NA	240	15
NVEC200_013206_1.1	QPPYLDLTPAYFHIR	QPPYLDLTPAYFHIR(-.98)	Amidation	49.86	1828.96	-0.5	915.488	64.79	2461000	3051300	6903200	10562000	240	15
NVEC200_013206_1.1	QPPYLDLTPAYFHIR	Q(-17.03)PPYLDLTPAYFHIR(-.98)	Pyro-glu from Q; Amidation	52.95	1811.94	-1.8	906.973	71.84	322000000	230650000	13835000	65955000	240	15
NVEC200_013206_1.1	QPPYLDLTPAYFHIR	Q(-17.03)PPYLDLTPAYFHIR	Pyro-glu from Q	23.37	1812.92	2.5	907.47	73.16	NA	NA	8294.2	NA	240	15
NVE15069	QPPYLDLTPAYFHIRG	Q(-17.03)PPYLDLTPAYFHIRG	Pyro-glu from Q	39.15	1869.94	-3	935.975	72.11	24094	NA	NA	NA	213	16
Nvec_HIRamide	QPPYLDLTPAYFHIRG	Q(-17.03)PPYLDLTPAYFHIRG	Pyro-glu from Q	39.15	1869.94	-3	935.975	72.11	24094	NA	NA	NA	240	16
NVEC200_013206_1.1	QPPYLDLTPAYFHIRG	Q(-17.03)PPYLDLTPAYFHIRG	Pyro-glu from Q	39.15	1869.94	-3	935.975	72.11	24094	NA	NA	NA	240	16
Nvec_HIRamide	QPSYFHIR	Q(-17.03)PSYFHIR(-.98)	Pyro-glu from Q; Amidation	33	1028.52	0.5	515.267	48.7	55988	94998	NA	NA	240	8
NVEC200_013206_1.1	QPSYFHIR	Q(-17.03)PSYFHIR(-.98)	Pyro-glu from Q; Amidation	33	1028.52	0.5	515.267	48.7	55988	94998	NA	NA	240	8
NVE15069	QQPPMIDLSEPAFFHIR	QQPPM(+15.99)IDLSEPAFFHIR(-.98)	Oxidation (M); Amidation	28.14	2040.03	0.3	681.016	68.1	NA	21872	NA	0	213	17
NVE15069	QQPPMIDLSEPAFFHIR	Q(-17.03)QPPMIDLSEPAFFHIR(-.98)	Pyro-glu from Q; Amidation	54.85	2007	1.3	670.009	71.98	85648000	66779000	6011800	11193000	213	17
NVE15069	QQPPMIDLSEPAFFHIR	QQPPMIDLSEPAFFHIR(-.98)	Amidation	50.31	2024.03	-1.9	675.683	72.38	1676300	1380900	149220	274130	213	17
NVE15069	QQPPMIDLSEPAFFHIR	Q(-17.03)QPPM(+15.99)IDLSEPAFFHIR(-.98)	Pyro-glu from Q; Oxidation (M); Amidation	54.63	2023	-0.7	1012.51	67.34	13410000	10768000	370900	1206500	213	17
Nvec_HIRamide	QQPPMIDLSEPAFFHIR	QQPPM(+15.99)IDLSEPAFFHIR(-.98)	Oxidation (M); Amidation	28.14	2040.03	0.3	681.016	68.1	NA	21872	NA	0	240	17
Nvec_HIRamide	QQPPMIDLSEPAFFHIR	Q(-17.03)QPPMIDLSEPAFFHIR(-.98)	Pyro-glu from Q; Amidation	54.85	2007	1.3	670.009	71.98	85648000	66779000	6011800	11193000	240	17
Nvec_HIRamide	QQPPMIDLSEPAFFHIR	QQPPMIDLSEPAFFHIR(-.98)	Amidation	50.31	2024.03	-1.9	675.683	72.38	1676300	1380900	149220	274130	240	17
Nvec_HIRamide	QQPPMIDLSEPAFFHIR	Q(-17.03)QPPM(+15.99)IDLSEPAFFHIR(-.98)	Pyro-glu from Q; Oxidation (M); Amidation	54.63	2023	-0.7	1012.51	67.34	13410000	10768000	370900	1206500	240	17
NVEC200_013206_1.1	QQPPMIDLSEPAFFHIR	QQPPM(+15.99)IDLSEPAFFHIR(-.98)	Oxidation (M); Amidation	28.14	2040.03	0.3	681.016	68.1	NA	21872	NA	0	240	17
NVEC200_013206_1.1	QQPPMIDLSEPAFFHIR	Q(-17.03)QPPMIDLSEPAFFHIR(-.98)	Pyro-glu from Q; Amidation	54.85	2007	1.3	670.009	71.98	85648000	66779000	6011800	11193000	240	17
NVEC200_013206_1.1	QQPPMIDLSEPAFFHIR	QQPPMIDLSEPAFFHIR(-.98)	Amidation	50.31	2024.03	-1.9	675.683	72.38	1676300	1380900	149220	274130	240	17
NVEC200_013206_1.1	QQPPMIDLSEPAFFHIR	Q(-17.03)QPPM(+15.99)IDLSEPAFFHIR(-.98)	Pyro-glu from Q; Oxidation (M); Amidation	54.63	2023	-0.7	1012.51	67.34	13410000	10768000	370900	1206500	240	17
NVE9858	QRDLYGIGLW	Q(-17.03)RDLYGIGLW(-.98)	Pyro-glu from Q; Amidation	23.26	1201.62	2.1	601.821	68.47	453630	NA	NA	NA	296	10
Nvec_GLWamide	QRDLYGIGLW	Q(-17.03)RDLYGIGLW(-.98)	Pyro-glu from Q; Amidation	23.26	1201.62	2.1	601.821	68.47	453630	NA	NA	NA	347	10
NVEC200_000296_1.1	QRDLYGIGLW	Q(-17.03)RDLYGIGLW(-.98)	Pyro-glu from Q; Amidation	23.26	1201.62	2.1	601.821	68.47	453630	NA	NA	NA	419	10
NVE15666	QSDLKKMF	Q(-17.03)SDLKKMF	Pyro-glu from Q	32.18	978.484	0.2	490.25	49.53	NA	NA	NA	2225100	234	8
NVE3868	QSLFKLED	Q(-17.03)SLFKLED	Pyro-glu from Q	26.59	961.476	-0.7	481.745	59.48	405740	564650	NA	NA	74	8
NVE21658	QWGHKGWA	Q(-17.03)WGHKGWA	Pyro-glu from Q	33.14	951.435	2.3	476.726	44.41	209830	NA	NA	82869	265	8
NVE6636	QWGHKGWA	Q(-17.03)WGHKGWA	Pyro-glu from Q	33.14	951.435	2.3	476.726	44.41	209830	NA	NA	82869	158	8
NVEC200_010517_1.1	QWGHKGWA	Q(-17.03)WGHKGWA	Pyro-glu from Q	33.14	951.435	2.3	476.726	44.41	209830	NA	NA	82869	282	8
NVE24305|HADP01189706.1	QWKDAHYPSREE	Q(-17.03)WKDAHYPSREE	Pyro-glu from Q	37.28	1527.67	3.8	510.234	36.98	1704700	1115600	153410	256870	66	12
NVE4012|Nvec_XP_032233649.1	QWTSVRP	Q(-17.03)WTSVRP(-.98)	Pyro-glu from Q; Amidation	29.4	854.44	1.9	428.228	44.46	1757700	2014500	1678300	2863500	269	7
NVE4012|Nvec_XP_032233649.1	QWTSVRP	QWTSVRP(-.98)	Amidation	28.1	871.466	1.7	436.741	44.55	NA	31432	39495	112290	269	7
NVEC200_002800_1.1|Nvec_VRHamide	QYLDPRP	Q(-17.03)YLDPRP(-.98)	Pyro-glu from Q; Amidation	24.85	869.439	0.9	435.727	42.54	NA	10685000	NA	NA	121	7
NVE4012|Nvec_XP_032233649.1	RPQESADTPSIFRP	RPQESADTPSIFRP(-.98)	Amidation	42.89	1598.82	0.9	533.947	44.59	95484	NA	154380	441300	269	14
NVE22506	RQMPNMVPFH	RQMPNMVPFH(-.98)	Amidation	39.01	1254.61	-1.2	419.211	45.66	749160	554680	NA	NA	162	10
NVE15069	SEPAFFHIR	SEPAFFHIR(-.98)	Amidation	35.08	1101.57	1.3	368.198	48.5	1218000	822480	0	4192700	213	9
Nvec_HIRamide	SEPAFFHIR	SEPAFFHIR(-.98)	Amidation	35.08	1101.57	1.3	368.198	48.5	1218000	822480	0	4192700	240	9
NVEC200_013206_1.1	SEPAFFHIR	SEPAFFHIR(-.98)	Amidation	35.08	1101.57	1.3	368.198	48.5	1218000	822480	0	4192700	240	9
NVE11178|HADP01056499.1	SPEKLVPMMKEYI	SPEKLVPMM(+15.99)KEYI	Oxidation (M)	34.21	1579.8	0.9	527.607	49.49	1146500	1205900	87078	171480	64	13
NVE11178|HADP01056499.1	SPEKLVPMMKEYI	SPEKLVPM(+15.99)MKEYI	Oxidation (M)	39.42	1579.8	-1.4	790.906	53.87	1405100	1820900	62879	23020	64	13
NVE11178|HADP01056499.1	SPEKLVPMMKEYI	SPEKLVPM(+15.99)M(+15.99)KEYI	Oxidation (M)	24.04	1595.79	-1.5	798.903	45.13	254610	NA	NA	NA	64	13
NVE11178|HADP01056499.1	SPEKLVPMMKEYI	SPEKLVPMMKEYI		50.4	1563.8	-0.1	782.909	58.94	11345000	14749000	3097900	3384200	64	13
NVE11178|HADP01056499.1	SPEKLVPMMKEYIRRQEEL	SPEKLVPMMKEYIRRQEEL		48.37	2375.23	2.9	594.817	55.75	36863000	25315000	307350	274470	64	19
NVE11178|HADP01056499.1	SPEKLVPMMKEYIRRQEEL	SPEKLVPM(+15.99)MKEYIRRQEEL	Oxidation (M)	41.75	2391.23	0	598.814	51.3	1382200	1249800	NA	NA	64	19
NVE11178|HADP01056499.1	SPEKLVPMMKEYIRRQEEL	SPEKLVPMM(+15.99)KEYIRRQEEL	Oxidation (M)	40.4	2391.23	-0.3	598.814	47.36	244590	597910	NA	NA	64	19
NVE16920	SPPQWKLDSSPPQW	SPPQWKLDSSPPQW		48.28	1651.8	-2.4	826.905	57.95	NA	NA	215320	283960	159	14
NVE15069	SSEQPPLDLGPAYFHIR	SSEQPPLDLGPAYFHIR(-.98)	Amidation	47.92	1924.98	-0.5	642.667	61.02	NA	NA	81417	215330	213	17
Nvec_HIRamide	SSEQPPLDLGPAYFHIR	SSEQPPLDLGPAYFHIR(-.98)	Amidation	47.92	1924.98	-0.5	642.667	61.02	NA	NA	81417	215330	240	17
NVEC200_013206_1.1	SSEQPPLDLGPAYFHIR	SSEQPPLDLGPAYFHIR(-.98)	Amidation	47.92	1924.98	-0.5	642.667	61.02	NA	NA	81417	215330	240	17
NVE15069	TEGPPYIDLTEPSFFHIR	TEGPPYIDLTEPSFFHIR(-.98)	Amidation	50.06	2117.06	0.3	706.693	68.81	NA	NA	225620	0	213	18
Nvec_HIRamide	TEGPPYIDLTEPSFFHIR	TEGPPYIDLTEPSFFHIR(-.98)	Amidation	50.06	2117.06	0.3	706.693	68.81	NA	NA	225620	0	240	18
NVEC200_013206_1.1	TEGPPYIDLTEPSFFHIR	TEGPPYIDLTEPSFFHIR(-.98)	Amidation	50.06	2117.06	0.3	706.693	68.81	NA	NA	225620	0	240	18
NVE15069	TEPSFFHIR	TEPSFFHIR(-.98)	Amidation	31.98	1131.58	0.5	378.202	48.66	277220	NA	205960	3740100	213	9
Nvec_HIRamide	TEPSFFHIR	TEPSFFHIR(-.98)	Amidation	31.98	1131.58	0.5	378.202	48.66	277220	NA	205960	3740100	240	9
NVEC200_013206_1.1	TEPSFFHIR	TEPSFFHIR(-.98)	Amidation	31.98	1131.58	0.5	378.202	48.66	277220	NA	205960	3740100	240	9
Nvec_HIRamide	TEYPPFLELGQPSYFHIR	TEYPPFLELGQPSYFHIR(-.98)	Amidation	55.15	2192.11	0.5	731.71	70.07	NA	NA	318390	NA	240	18
NVEC200_013206_1.1	TEYPPFLELGQPSYFHIR	TEYPPFLELGQPSYFHIR(-.98)	Amidation	55.15	2192.11	0.5	731.71	70.07	NA	NA	318390	NA	240	18
NVE15069	THNAPPLDLSGPAYFHIR	THNAPPLDLSGPAYFHIR(-.98)	Amidation	53.63	2004.03	1.2	669.019	56.62	10697	NA	71890	336990	213	18
NVEC200_013206_1.1	THNAPPLDLSGPAYFHIR	THNAPPLDLSGPAYFHIR(-.98)	Amidation	53.63	2004.03	1.2	669.019	56.62	10697	NA	71890	336990	240	18
NVE15069	TKNPPIDLGPAYFHIR	TKNPPIDLGPAYFHIR(-.98)	Amidation	38.4	1837	-3.5	613.338	56.2	NA	NA	29301	129430	213	16
Nvec_HIRamide	TKNPPIDLGPAYFHIR	TKNPPIDLGPAYFHIR(-.98)	Amidation	38.4	1837	-3.5	613.338	56.2	NA	NA	29301	129430	240	16
NVEC200_013206_1.1	TKNPPIDLGPAYFHIR	TKNPPIDLGPAYFHIR(-.98)	Amidation	38.4	1837	-3.5	613.338	56.2	NA	NA	29301	129430	240	16
NVE16920	TPPQWKLESTPPQW	TPPQWKLESTPPQW		41.04	1693.85	-0.8	847.93	58.46	NA	NA	539450	1280900	159	14
NVE15069	TQQPPMIDLSEPAFFHIR	TQQPPMIDLSEPAFFHIR(-.98)	Amidation	49.82	2125.08	-1.4	709.366	67.52	NA	NA	241900	465450	213	18
Nvec_HIRamide	TQQPPMIDLSEPAFFHIR	TQQPPMIDLSEPAFFHIR(-.98)	Amidation	49.82	2125.08	-1.4	709.366	67.52	NA	NA	241900	465450	240	18
NVEC200_013206_1.1	TQQPPMIDLSEPAFFHIR	TQQPPMIDLSEPAFFHIR(-.98)	Amidation	49.82	2125.08	-1.4	709.366	67.52	NA	NA	241900	465450	240	18
NVEC200_005035_1.1	VPPSKGAGEQGFIPWFS	VPPSKGAGEQGFIPWFS(-.98)	Amidation	36.1	1801.91	-1.2	901.964	67.6	11432000	5230900	3560900	13595000	301	17
Nvec_HIRamide	YPPFLELGQPSYFHIR	YPPFLELGQPSYFHIR(-.98)	Amidation	57.44	1962.02	-0.1	655.012	68.93	309340000	285270000	7152700	125440000	240	16
NVEC200_013206_1.1	YPPFLELGQPSYFHIR	YPPFLELGQPSYFHIR(-.98)	Amidation	57.44	1962.02	-0.1	655.012	68.93	309340000	285270000	7152700	125440000	240	16
NVE17328|HADO01000428.1	YPPRWEEYENQLYQ	YPPRWEEYENQLYQ		46.13	1913.86	-3	957.934	53.12	227770000	132250000	47362000	76219000	69	14

## Sheet: Uncertain_LC-MS
PROPEPTIDE	PEPTIDE_SEQUENCE	PEPTIDE(PTM)	PTM	-10lgP	Mass	ppm	m/z	RT	Area Adult	Area Juvenile	Area Larvae	Area Mix	PROPEPTIDE_LENGTH	PEPTIDE_LENGTH
NVE17328|HADO01000428.1	AEMGYPPRWEEYENQLYQ	AEMGYPPRWEEYENQLYQ		46.58	2302	-1.2	1152.01	56.79	1871500	NA	NA	74100	69	18
NVE17328|HADO01000428.1	AEMGYPPRWEEYENQLYQ	AEM(+15.99)GYPPRWEEYENQLYQ	Oxidation (M)	23.09	2317.99	0.6	1160.01	54.72	306820	NA	NA	NA	69	18
NVE9107	ALAESLGLKLPTDTLTGEKST	ALAESLGLKLPTDTLTGEKST		38.88	2144.16	0.5	715.727	62.13	144230	177740	NA	NA	767	21
NVE8376	ALPFVAVRFQMAKAANS	ALPFVAVRFQMAKAANS		39.63	1819.98	-2	910.994	62.81	NA	NA	324690	NA	78	17
NVE21426	ARDEDLVYTTIDCPVGIWVCQ	ARDEDLVYTTIDC(-1.01)PVGIWVC(-1.01)Q	Half of a disulfide bridge	39.06	2393.1	-2.2	1197.56	74.8	37717	NA	NA	NA	182	21
NVE5329	ARNDDIVYTTIDCPPGIWVC	ARNDDIVYTTIDC(-1.01)PPGIWVC(-1.01)	Half of a disulfide bridge	42.91	2248.03	-0.4	1125.02	72	466260	195980	NA	NA	138	20
NVE5329	ARNDDIVYTTIDCPPGIWVCK	ARNDDIVYTTIDC(-1.01)PPGIWVC(-1.01)K	Half of a disulfide bridge	31.24	2376.12	0.5	793.049	67.71	542850	476000	NA	NA	138	21
NVE5329	ARNDDIVYTTIDCPPGIWVCKKRRSEIAQPV	ARNDDIVYTTIDC(-1.01)PPGIWVC(-1.01)KKRRSEIAQPV	Half of a disulfide bridge	39.3	3540.8	-0.2	886.206	60.3	2977700	1870400	79533	58131	138	31
NVEC200_013206_1.1	AVEQPPYLDLTPSYFHIR	AVEQPPYLDLTPSYFHIR(-.98)	Amidation	50.75	2144.11	0.4	715.709	65.77	NA	660360	1107100	2647400	240	18
NVE15069	AVEQPPYLDLTPSYFHIR	AVEQPPYLDLTPSYFHIR(-.98)	Amidation	50.75	2144.11	0.4	715.709	65.77	NA	660360	1107100	2647400	213	18
Nvec_HIRamide	AVEQPPYLDLTPSYFHIR	AVEQPPYLDLTPSYFHIR(-.98)	Amidation	50.75	2144.11	0.4	715.709	65.77	NA	660360	1107100	2647400	240	18
NVEC200_013996_1.1	CKADDIDCLQQLTF	C(-1.01)KADDIDC(-1.01)LQQLTF	Half of a disulfide bridge	21.74	1609.71	-1.5	805.862	64.17	NA	923380	NA	NA	313	14
NVEC200_013206_1.1	DSKQPPIDLSPAAYFHIR	DSKQPPIDLSPAAYFHIR(-.98)	Amidation	46.98	2053.07	4.4	514.278	62.51	NA	NA	89782	238720	240	18
NVE15069	DSKQPPIDLSPAAYFHIR	DSKQPPIDLSPAAYFHIR(-.98)	Amidation	46.98	2053.07	4.4	514.278	62.51	NA	NA	89782	238720	213	18
Nvec_HIRamide	DSKQPPIDLSPAAYFHIR	DSKQPPIDLSPAAYFHIR(-.98)	Amidation	46.98	2053.07	4.4	514.278	62.51	NA	NA	89782	238720	240	18
NVEC200_005035_1.1	DTTKAAVQNDLVPPSKGAGEQGFIPWFS	DTTKAAVQNDLVPPSKGAGEQGFIPWFS(-.98)	Amidation	51.11	2958.49	-4.3	1480.24	68.15	7763300	5754600	NA	1693400	301	28
NVE2973	EFEPKNALQNDNAPPGNGEGEAGFIPWFS	EFEPKNALQNDNAPPGNGEGEAGFIPWFS(-.98)	Amidation	45.37	3130.44	-1.5	1566.23	70.8	13936000	11405000	NA	NA	253	29
NVE2974	EFEPKNALQNDNAPPGNGEGEAGFIPWFS	EFEPKNALQNDNAPPGNGEGEAGFIPWFS(-.98)	Amidation	45.37	3130.44	-1.5	1566.23	70.8	13936000	11405000	NA	NA	221	29
NVEC200_005035_1.1	EFEPKNALQNDNAPPGNGEGEAGFIPWFS	EFEPKNALQNDNAPPGNGEGEAGFIPWFS(-.98)	Amidation	45.37	3130.44	-1.5	1566.23	70.8	13936000	11405000	NA	NA	301	29
NVE2974	EFNPKNALKNDNAPPGNEEGEAGFIPWFS	EFNPKNALKNDNAPPGNEEGEAGFIPWFS(-.98)	Amidation	39.3	3187.5	0.4	797.883	67.51	11365000	7535000	NA	1106400	221	29
NVEC200_002800_1.1|Nvec_VRHamide	ELFNAGGPPPIYLPVRP	ELFNAGGPPPIYLPVRP(-.98)	Amidation	40.32	1835.01	-2.8	612.675	68.8	NA	NA	260190	NA	121	17
NVEC200_004815_1.1	FPPSPPKAPDTVEAVA	FPPSPPKAPDTVEAVA		43.05	1621.84	0.6	811.925	51.43	3445300	2580900	1037400	2445400	248	16
NVE21750	FPPSPPKAPDTVEAVA	FPPSPPKAPDTVEAVA		43.05	1621.84	0.6	811.925	51.43	3445300	2580900	1037400	2445400	248	16
NVE339	GHKTTIADAGPLRIMPIS	GHKTTIADAGPLRIMPIS		43.75	1877.02	2.2	626.682	58	90701	NA	10797	340270	219	18
NVE23858	GPIPPVPLI	GPIPPVPLI		32.14	901.564	1	902.572	71.8	NA	NA	136960	336740	679	9
NVE1473	GRVVHKGKNPPQPPFRIPI	GRVVHKGKNPPQPPFRIPI(-.98)	Amidation	41.57	2135.26	1.3	534.823	49.99	2783400	NA	131270	998470	202	19
NVE23858	IPPVPLI	IPPVPLI		21.98	747.489	-0.4	374.752	67.95	4961400	NA	NA	NA	679	7
NVE5454	IPPYGEVDGAEEYF	IPPYGEVDGAEEYF		29.91	1584.7	4	793.36	60.31	NA	NA	NA	38175	72	14
NVE5329	IVYTTIDCPPGIWVC	IVYTTIDC(-1.01)PPGIWVC(-1.01)	Half of a disulfide bridge	23.4	1676.79	-0.8	839.404	74.78	NA	643460	NA	NA	138	15
NVE13034	KPPPTWPLWP	KPPPTWPLWP		27.9	1217.66	-0.3	609.837	68.4	1631700	0	NA	NA	286	10
NVE18122	KPPPTWPLWP	KPPPTWPLWP		27.9	1217.66	-0.3	609.837	68.4	1631700	0	NA	NA	300	10
NVEC200_013206_1.1	KQPPIDLSPAAYFHIR	KQPPIDLSPAAYFHIR(-.98)	Amidation	44.44	1851.02	1.8	463.762	60.43	48842	170500	0	413570	240	16
NVE15069	KQPPIDLSPAAYFHIR	KQPPIDLSPAAYFHIR(-.98)	Amidation	44.44	1851.02	1.8	463.762	60.43	48842	170500	0	413570	213	16
Nvec_HIRamide	KQPPIDLSPAAYFHIR	KQPPIDLSPAAYFHIR(-.98)	Amidation	44.44	1851.02	1.8	463.762	60.43	48842	170500	0	413570	240	16
NVEC200_013206_1.1	KQPPYLDLGEPSFFHIR	KQPPYLDLGEPSFFHIR(-.98)	Amidation	44.3	2042.07	-0.4	681.698	63.07	NA	NA	67688	208140	240	17
NVE15069	KQPPYLDLGEPSFFHIR	KQPPYLDLGEPSFFHIR(-.98)	Amidation	44.3	2042.07	-0.4	681.698	63.07	NA	NA	67688	208140	213	17
Nvec_HIRamide	KQPPYLDLGEPSFFHIR	KQPPYLDLGEPSFFHIR(-.98)	Amidation	44.3	2042.07	-0.4	681.698	63.07	NA	NA	67688	208140	240	17
NVE15666	LRVKADNNPSDDDALSRFF	LRVKADNNPSDDDALSRFF		52.66	2179.07	1.1	545.774	59.14	140930	818110	31533	NA	234	19
NVEC200_013206_1.1	LSGEQPPYLDLTPAYFHIR	LSGEQPPYLDLTPAYFHIR(-.98)	Amidation	55.71	2215.14	-1.4	739.387	67.12	489660	661380	912790	1559900	240	19
NVE15069	LSGEQPPYLDLTPAYFHIR	LSGEQPPYLDLTPAYFHIR(-.98)	Amidation	55.71	2215.14	-1.4	739.387	67.12	489660	661380	912790	1559900	213	19
Nvec_HIRamide	LSGEQPPYLDLTPAYFHIR	LSGEQPPYLDLTPAYFHIR(-.98)	Amidation	55.71	2215.14	-1.4	739.387	67.12	489660	661380	912790	1559900	240	19
NVEC200_014078_1.1	MPEQDANPQTRFD	MPEQDANPQTRFD		22.37	1547.67	2.5	774.843	37.91	37743	NA	NA	NA	412	13
NVEC200_014078_1.1	MPEQDANPQTRFD	MPEQDANPQTRFD(-.98)	Amidation	31.84	1546.68	1.9	774.351	37.26	1391200	930180	495080	1384700	412	13
NVE7549|Nvec_RFamide	MPEQDANPQTRFD	MPEQDANPQTRFD		22.37	1547.67	2.5	774.843	37.91	37743	NA	NA	NA	396	13
NVE7549|Nvec_RFamide	MPEQDANPQTRFD	MPEQDANPQTRFD(-.98)	Amidation	31.84	1546.68	1.9	774.351	37.26	1391200	930180	495080	1384700	396	13
NVE2974	PPGNEEGEAGFIPWFS	PPGNEEGEAGFIPWFS(-.98)	Amidation	26.47	1731.79	-1.6	866.9	72.68	44724	NA	NA	NA	221	16
NVEC200_012385_1.1	QDTSLASSDKLS	Q(-17.03)DTSLASSDKLS	Pyro-glu from Q	33.1	1233.57	1.9	617.795	40.35	290850	406340	NA	NA	434	12
NVE2302	QESSAGPPQGLRW	Q(-17.03)ESSAGPPQGLRW(-.98)	Pyro-glu from Q; Amidation	44.61	1393.67	-2.6	697.842	50.26	56831	44505	NA	NA	66	13
NVE2302	QESSAGPPQGLRW	QESSAGPPQGLRW(-.98)	Amidation	31.95	1410.7	0.6	706.358	50.26	62301	NA	NA	NA	66	13
HADP01262889.1	QESSAGPPQGLRW	Q(-17.03)ESSAGPPQGLRW(-.98)	Pyro-glu from Q; Amidation	44.61	1393.67	-2.6	697.842	50.26	56831	44505	NA	NA	71	13
HADP01262889.1	QESSAGPPQGLRW	QESSAGPPQGLRW(-.98)	Amidation	31.95	1410.7	0.6	706.358	50.26	62301	NA	NA	NA	71	13
NVE24308	QESSAGPPQGLRW	Q(-17.03)ESSAGPPQGLRW(-.98)	Pyro-glu from Q; Amidation	44.61	1393.67	-2.6	697.842	50.26	56831	44505	NA	NA	57	13
NVE24308	QESSAGPPQGLRW	QESSAGPPQGLRW(-.98)	Amidation	31.95	1410.7	0.6	706.358	50.26	62301	NA	NA	NA	57	13
NVE12918|HADO01001257.1	QFNEGSVAEEEARKEFLRALLRSAE	QFNEGSVAEEEARKEFLRALLRSAE		48.07	2878.46	2	576.7	64.55	5803200	4555800	333700	NA	77	25
NVE12918|HADO01001257.1	QFNEGSVAEEEARKEFLRALLRSAE	Q(-17.03)FNEGSVAEEEARKEFLRALLRSAE	Pyro-glu from Q	53.06	2861.43	-0.2	954.817	69.66	133780000	70104000	1230700	192990	77	25
NVE4012|Nvec_XP_032233649.1	QGLMFRPG	Q(-17.03)GLMFRPG	Pyro-glu from Q	29.62	887.432	-1.1	444.723	54.54	NA	NA	NA	39825	269	8
NVE6636	QGWEKVDM	Q(-17.03)GWEKVDM	Pyro-glu from Q	32.28	974.417	-0.5	488.215	50.82	728100	879550	45732	480070	158	8
NVE6636	QGWEKVDM	QGWEKVDM		26.28	991.443	-1.9	496.728	50.4	NA	NA	NA	40536	158	8
NVEC200_010517_1.1	QGWEKVDM	Q(-17.03)GWEKVDM	Pyro-glu from Q	32.28	974.417	-0.5	488.215	50.82	728100	879550	45732	480070	282	8
NVEC200_010517_1.1	QGWEKVDM	QGWEKVDM		26.28	991.443	-1.9	496.728	50.4	NA	NA	NA	40536	282	8
NVE21167	QKTPEECPPGLWGC	Q(-17.03)KTPEEC(-1.01)PPGLWGC(-1.01)	Pyro-glu from Q; Half of a disulfide bridge	27.06	1524.64	-0.6	763.326	57.39	1878600	113120	0	1900400	263	14
NVE897	QLPKLEPVKE	Q(-17.03)LPKLEPVKE	Pyro-glu from Q	29.96	1162.66	-0.1	582.337	51.85	311270	NA	NA	580780	234	10
NVEC200_014828_1.1	QLPKLEPVKE	Q(-17.03)LPKLEPVKE	Pyro-glu from Q	29.96	1162.66	-0.1	582.337	51.85	311270	NA	NA	580780	233	10
HADP01211238.1	QQRANPGYDRF	Q(-17.03)QRANPGYDRF	Pyro-glu from Q	33.17	1333.62	2.7	667.817	38.51	NA	NA	1662300	NA	71	11
HADP01211238.1	QRANPGYDRF	Q(-17.03)RANPGYDRF	Pyro-glu from Q	24.73	1205.56	2.7	603.788	38.96	NA	NA	3218400	NA	71	10
NVE6636	QVRISETTDPWVWEP	Q(-17.03)VRISETTDPWVWEP	Pyro-glu from Q	36.81	1824.87	0.5	913.442	69.85	363510	NA	NA	NA	158	15
NVEC200_010517_1.1	QVRISETTDPWVWEP	Q(-17.03)VRISETTDPWVWEP	Pyro-glu from Q	36.81	1824.87	0.5	913.442	69.85	363510	NA	NA	NA	282	15
NVE21658	QWGHKGWA	Q(-17.03)WGHKGWA	Pyro-glu from Q	33.14	951.435	2.3	476.726	44.41	209830	NA	NA	82869	265	8
NVE6636	QWGHKGWA	Q(-17.03)WGHKGWA	Pyro-glu from Q	33.14	951.435	2.3	476.726	44.41	209830	NA	NA	82869	158	8
NVEC200_010517_1.1	QWGHKGWA	Q(-17.03)WGHKGWA	Pyro-glu from Q	33.14	951.435	2.3	476.726	44.41	209830	NA	NA	82869	282	8
NVE5329	RNDDIVYTTIDCPPGIWVC	RNDDIVYTTIDC(-1.01)PPGIWVC(-1.01)	Half of a disulfide bridge	40.65	2176.99	-1.7	1089.5	72.6	2105100	1104500	86171	126990	138	19
NVE5329	RNDDIVYTTIDCPPGIWVCK	RNDDIVYTTIDC(-1.01)PPGIWVC(-1.01)K	Half of a disulfide bridge	36.2	2305.09	3.6	769.372	67.27	166090	149300	NA	NA	138	20
NVE22506	RQMPNMVPFH	RQMPNMVPFH(-.98)	Amidation	39.01	1254.61	-1.2	419.211	45.66	749160	554680	NA	NA	162	10
NVEC200_013206_1.1	SSEQPPLDLGPAYFHIR	SSEQPPLDLGPAYFHIR(-.98)	Amidation	47.92	1924.98	-0.5	642.667	61.02	NA	NA	81417	215330	240	17
NVE15069	SSEQPPLDLGPAYFHIR	SSEQPPLDLGPAYFHIR(-.98)	Amidation	47.92	1924.98	-0.5	642.667	61.02	NA	NA	81417	215330	213	17
Nvec_HIRamide	SSEQPPLDLGPAYFHIR	SSEQPPLDLGPAYFHIR(-.98)	Amidation	47.92	1924.98	-0.5	642.667	61.02	NA	NA	81417	215330	240	17
NVEC200_013206_1.1	TAKQPPYLDLGEPSFFHIR	TAKQPPYLDLGEPSFFHIR(-.98)	Amidation	42.95	2214.16	0.1	554.547	63.53	NA	NA	84557	117100	240	19
NVE15069	TAKQPPYLDLGEPSFFHIR	TAKQPPYLDLGEPSFFHIR(-.98)	Amidation	42.95	2214.16	0.1	554.547	63.53	NA	NA	84557	117100	213	19
Nvec_HIRamide	TAKQPPYLDLGEPSFFHIR	TAKQPPYLDLGEPSFFHIR(-.98)	Amidation	42.95	2214.16	0.1	554.547	63.53	NA	NA	84557	117100	240	19
NVEC200_013206_1.1	TEGPPYIDLTEPSFFHIR	TEGPPYIDLTEPSFFHIR(-.98)	Amidation	50.06	2117.06	0.3	706.693	68.81	NA	NA	225620	0	240	18
NVE15069	TEGPPYIDLTEPSFFHIR	TEGPPYIDLTEPSFFHIR(-.98)	Amidation	50.06	2117.06	0.3	706.693	68.81	NA	NA	225620	0	213	18
Nvec_HIRamide	TEGPPYIDLTEPSFFHIR	TEGPPYIDLTEPSFFHIR(-.98)	Amidation	50.06	2117.06	0.3	706.693	68.81	NA	NA	225620	0	240	18
NVEC200_013206_1.1	TEYPPFLELGQPSYFHIR	TEYPPFLELGQPSYFHIR(-.98)	Amidation	55.15	2192.11	0.5	731.71	70.07	NA	NA	318390	NA	240	18
Nvec_HIRamide	TEYPPFLELGQPSYFHIR	TEYPPFLELGQPSYFHIR(-.98)	Amidation	55.15	2192.11	0.5	731.71	70.07	NA	NA	318390	NA	240	18
NVEC200_013206_1.1	THNAPPLDLSGPAYFHIR	THNAPPLDLSGPAYFHIR(-.98)	Amidation	53.63	2004.03	1.2	669.019	56.62	10697	NA	71890	336990	240	18
NVE15069	THNAPPLDLSGPAYFHIR	THNAPPLDLSGPAYFHIR(-.98)	Amidation	53.63	2004.03	1.2	669.019	56.62	10697	NA	71890	336990	213	18
NVEC200_013206_1.1	TKNPPIDLGPAYFHIR	TKNPPIDLGPAYFHIR(-.98)	Amidation	38.4	1837	-3.5	613.338	56.2	NA	NA	29301	129430	240	16
NVE15069	TKNPPIDLGPAYFHIR	TKNPPIDLGPAYFHIR(-.98)	Amidation	38.4	1837	-3.5	613.338	56.2	NA	NA	29301	129430	213	16
Nvec_HIRamide	TKNPPIDLGPAYFHIR	TKNPPIDLGPAYFHIR(-.98)	Amidation	38.4	1837	-3.5	613.338	56.2	NA	NA	29301	129430	240	16
NVEC200_013206_1.1	TQQPPMIDLSEPAFFHIR	TQQPPMIDLSEPAFFHIR(-.98)	Amidation	49.82	2125.08	-1.4	709.366	67.52	NA	NA	241900	465450	240	18
NVE15069	TQQPPMIDLSEPAFFHIR	TQQPPMIDLSEPAFFHIR(-.98)	Amidation	49.82	2125.08	-1.4	709.366	67.52	NA	NA	241900	465450	213	18
Nvec_HIRamide	TQQPPMIDLSEPAFFHIR	TQQPPMIDLSEPAFFHIR(-.98)	Amidation	49.82	2125.08	-1.4	709.366	67.52	NA	NA	241900	465450	240	18
NVE4012|Nvec_XP_032233649.1	VPEAFLDQWTSVRP	VPEAFLDQWTSVRP(-.98)	Amidation	35.07	1642.85	-0.5	822.43	63.64	NA	NA	16308	NA	269	14
NVE11178|HADP01056499.1	VPMMKEYI	VPMMKEYI		33.18	1009.5	0.3	505.756	51.13	211820	319630	0	122330	64	8
NVEC200_002800_1.1|Nvec_VRHamide	YRITDPGDLEKPQENDEPGPPMIKIPVRH	YRITDPGDLEKPQENDEPGPPMIKIPVRH(-.98)	Amidation	59.93	3339.7	-0.4	557.624	52.28	275530	NA	314320	56474	121	29
NVE12742	YRITDPGDLEKPQENDEPGPPMIKIPVRH	YRITDPGDLEKPQENDEPGPPMIKIPVRH(-.98)	Amidation	59.93	3339.7	-0.4	557.624	52.28	275530	NA	314320	56474	70	29

## Sheet: Poor_LC-MS
PROPEPTIDE	PEPTIDE_SEQUENCE	PEPTIDE(PTM)	PTM	-10lgP	Mass	ppm	m/z	RT	Area Adult	Area Juvenile	Area Larvae	Area Mix	PROPEPTIDE_LENGTH	PEPTIDE_LENGTH
HADP01262889.1	GPPQGLRWG	GPPQGLRWG		23.1	966.504	0.8	484.259	45.46	NA	NA	NA	341600	71	9
HADP01262889.1	WENPSEKQVRENAEREVQDFKDYFKKKYN	WENPSEKQVRENAEREVQDFKDYFKKKYN		23.26	3703.8	0.3	741.768	59.32	NA	312190	NA	NA	71	29
HADP01262889.1	WENPSEKQVRENAEREVQDFKDYFKKKYNRDLDI	WENPSEKQVRENAEREVQDFKDYFKKKYNRDLDI		40.53	4316.12	-0.6	617.596	62.26	18806000	1092500	1375600	124520	71	34
NVE10634	VAGVTTPGFNKISGDE	VAGVTTPGFNKISGDE		29.27	1590.79	-0.4	796.401	47.54	NA	NA	61596	NA	76	16
NVE11072	QLVDKTTQDLQRDSSSNA	Q(-17.03)LVDKTTQDLQRDSSSNA	Pyro-glu from Q	25.3	1987.94	-2.5	994.977	43.9	NA	NA	NA	32741	218	18
NVE11178|HADP01056499.1	ESPEKLVPMMKEYIRRQEEL	ESPEKLVPMMKEYIRRQEEL		48.47	2504.28	1.4	627.077	58.07	3192700	1172600	417920	209670	64	20
NVE11178|HADP01056499.1	QGLRWGREYDESPEKLVPMMKEYIRRQEEL	Q(-17.03)GLRWGREYDESPEKLVPMMKEYIRRQEEL	Pyro-glu from Q	36.55	3747.85	-1	750.577	65.24	1181100	NA	371200	NA	64	30
NVE11178|HADP01056499.1	QGLRWGREYDESPEKLVPMMKEYIRRQEELKKKREFSMN	Q(-17.03)GLRWGREYDESPEKLVPMMKEYIRRQEELKKKREFSMN	Pyro-glu from Q	30.05	4896.46	2.3	817.086	62.52	430010	NA	1799000	199980	64	39
NVE11178|HADP01056499.1	QGLRWGREYDESPEKLVPMMKEYIRRQEELKKKREFSMN	Q(-17.03)GLRWGREYDESPEKLVPMMKEYIRRQEELKKKREFSMN(-.98)	Pyro-glu from Q; Amidation	24.78	4895.48	-2.6	700.36	62.18	NA	NA	NA	0	64	39
NVE11178|HADP01056499.1	VPMMKEYIRRQEEL	VPMMKEYIRRQEEL		33.94	1820.93	-1.1	456.239	46.14	432280	211870	NA	NA	64	14
NVE11271	TILGSVSDYVLHHAHVPTIIIPKK	TILGSVSDYVLHHAHVPTIIIPKK		22.06	2637.5	3.5	528.509	74.21	NA	56472	NA	NA	155	24
NVE11386	YRLESLRNLPNDALEEESEVAEKSPL	YRLESLRNLPNDALEEESEVAEKSPL		48.33	3000.5	-0.7	751.133	62.39	250880	95863	NA	NA	92	26
NVE12327	KQKGSYKNMNHADFLKGLDRASS	KQKGSYKNMNHADFLKGLDRASS		38.47	2594.3	2.3	649.584	42.23	935390	1070800	NA	357400	82	23
NVE12327	QKGSYKNMNHADFLKGLDRASS	Q(-17.03)KGSYKNMNHADFLKGLDRASS	Pyro-glu from Q	35.21	2449.18	-1.1	613.302	47.07	NA	NA	NA	71465	82	22
NVE12742	ITDPGDLEKPQENDEPGPPMIKIPVRH	ITDPGDLEKPQENDEPGPPMIKIPVRH(-.98)	Amidation	22.71	3020.54	1.1	605.116	51.41	0	NA	NA	NA	70	27
NVE12918|HADO01001257.1	QFNEGSVAEEEARKEFLRALLRSAERRSKTDDYQ	Q(-17.03)FNEGSVAEEEARKEFLRALLRSAERRSKTDDYQ	Pyro-glu from Q	36.18	4010.98	1.7	669.506	64.81	49124000	31827000	1564100	1467100	77	34
NVE12918|HADO01001257.1	QFNEGSVAEEEARKEFLRALLRSAERRSKTDDYQ	QFNEGSVAEEEARKEFLRALLRSAERRSKTDDYQ		25.59	4028.01	1.7	672.343	62.58	1069900	577640	348460	NA	77	34
NVE13034	KPPPTWPLWP	KPPPTWPLWP		27.9	1217.66	-0.3	609.837	68.4	1631700	0	NA	NA	286	10
NVE13213	QTKEQVICEGPAKLALESYHIDLSKSHLCGENS	Q(-17.03)TKEQVIC(-1.01)EGPAKLALESYHIDLSKSHLC(-1.01)GENS	Pyro-glu from Q; Half of a disulfide bridge	31.61	3607.73	0.9	902.94	66.59	86358000	36184000	6585200	19243000	186	33
NVE13213	QTKEQVICEGPAKLALESYHIDLSKSHLCGENS	Q(-17.03)TKEQVICEGPAKLALESYHIDLSKSHLC(-1.01)GENS(-.98)	Pyro-glu from Q; Half of a disulfide bridge; Amidation	28.21	3607.75	-5.1	902.941	67.49	NA	NA	0	NA	186	33
NVE13213	WANDFKSFL	WANDFKSFL		25.82	1126.54	1	564.28	63.58	NA	55282	NA	49782	186	9
NVE13685	MMQNPEMQGEPPAATEVEDEDALAAYERMKEAIPEQK	MMQNPEMQGEPPAATEVEDEDALAAYERMKEAIPEQK		33.01	4175.88	-2.8	1044.97	63.06	NA	NA	157930	573730	76	37
NVE13685	MMQNPEMQGEPPAATEVEDEDALAAYERMKEAIPEQK	MMQNPEMQGEPPAATEVEDEDALAAYERMKEAIPEQK(-.98)	Amidation	24.76	4174.9	-5	1044.73	62.98	NA	NA	NA	0	76	37
NVE15069	ASDEKRDSKQPPIDLSPAAYFHIR	ASDEKRDSKQPPIDLSPAAYFHIR(-.98)	Amidation	46.64	2739.41	2.1	548.89	59.11	646600	941410	NA	NA	213	24
NVE15069	EQPPYLDLTPSYFHIR	EQPPYLDLTPSYFHIR(-.98)	Amidation	33.98	1974	-1.9	659.006	64.52	NA	NA	NA	26973	213	16
NVE15069	GPAYFHIR	GPAYFHIR(-.98)	Amidation	21.95	958.514	-1.1	480.264	59.9	NA	NA	NA	0	213	8
NVE15069	KNPPIDLGPAYFHIR	KNPPIDLGPAYFHIR(-.98)	Amidation	34.9	1735.95	-0.4	579.658	55.91	NA	NA	NA	29025	213	15
NVE15069	NPPIDLGPAYFHIRG	NPPIDLGPAYFHIRG		27.33	1665.86	-0.2	556.295	61.44	NA	30219	NA	NA	213	15
NVE15069	SSEQPPLDLGPAYFHIRGKRTKNPPIDLGPAYFHIR	SSEQPPLDLGPAYFHIRGKRTKNPPIDLGPAYFHIR(-.98)	Amidation	43.87	4086.17	1.6	584.747	64.53	NA	0	NA	NA	213	36
NVE15078	VMGFASPAIVYLSPWTKDSIKAMQAIPNSYPYPQLQDADKE	VMGFASPAIVYLSPWTKDSIKAMQAIPNSYPYPQLQDADKE		35.13	4569.26	-3.6	914.856	78.57	0	NA	420330	395530	68	41
NVE15078	VSLVMGFASPAIVYLSPWTKDSIKAMQAIPNSYPYPQLQDADKE	VSLVMGFASPAIVYLSPWTKDSIKAMQAIPNSYPYPQLQDADKE		50.84	4868.44	4.1	1218.12	84.13	0	NA	NA	NA	68	44
NVE15340	ISPSSEEQWKRAKKGESIRPSDEQLPSIGGGLDPSFGSSHHEF	ISPSSEEQWKRAKKGESIRPSDEQLPSIGGGLDPSFGSSHHEF		27.81	4693.28	0.9	939.664	54.51	138200	NA	NA	NA	1820	43
NVE15340	LDPSFGSSHHEF	LDPSFGSSHHEF		22.65	1358.59	1.1	680.303	43.93	25622	NA	NA	NA	1820	12
NVE15505	KPPKNWYW	KPPKNWYW		24.07	1117.57	1.3	559.793	48.8	NA	NA	258650	NA	345	8
NVE15529	DPMEELLSGVEPMNEEDKAWLAKFDAATKSSA	DPMEELLSGVEPMNEEDKAWLAKFDAATKSSA		45.99	3508.64	-4.7	878.163	76.29	104750	42687	NA	NA	211	32
NVE15666	SIPEQNPSGLELQLPYLAGTLPSYEVNDEDAPQSDLKKMF	SIPEQNPSGLELQLPYLAGTLPSYEVNDEDAPQSDLKKMF		33.91	4433.16	-3.9	1109.29	78.17	687640	1118500	NA	NA	234	40
NVE15677	LGILTPEELGLAK	LGILTPEELGLAK		29.04	1352.79	0.3	677.403	65.99	NA	NA	254690	NA	137	13
NVE16146	SPPVHPNPPYPVQ	SPPVHPNPPYPVQ		21.62	1427.72	1.7	714.868	43.35	NA	NA	166950	NA	581	13
NVE16210	GKPEPEEKPEVTSLPGARGEGDGEEPQFQMDI	GKPEPEEKPEVTSLPGARGEGDGEEPQFQMDI		30.04	3452.6	0.8	864.159	56.61	NA	NA	145860	NA	117	32
NVE16210	SLPGARGEGDGEEPQFQMDI	SLPGARGEGDGEEPQFQMDI		42.91	2131.95	-1	1066.98	57.8	NA	NA	157020	NA	117	20
NVE17328|HADO01000428.1	AEMGYPPRWEEYENQLYQRRDEDA	AEMGYPPRWEEYENQLYQRRDEDA		36.7	3044.34	-0.1	762.091	54.55	1754300	2027800	NA	NA	69	24
NVE17329	QGGLHREPEKEEEDALL	Q(-17.03)GGLHREPEKEEEDALL	Pyro-glu from Q	27.33	1931.92	-1.1	644.981	45.75	640850	NA	NA	149900	78	17
NVE18016	QIDLAKKDQIKVHGF	QIDLAKKDQIKVHGF		28.69	1738.97	1.2	435.751	45.64	NA	NA	NA	86033	113	15
NVE18122	KPPPTWPLWP	KPPPTWPLWP		27.9	1217.66	-0.3	609.837	68.4	1631700	0	NA	NA	300	10
NVE1820	AGDDAPRAVFPSIV	AGDDAPRAVFPSIV		22.39	1413.73	1.7	707.871	61.17	0	NA	NA	NA	270	14
NVE18646	LDSLKRLKAKARPQMYRYQEVTNT	LDSLKRLKAKARPQMYRYQEVTNT		28.94	2908.57	3.5	582.723	42.12	NA	NA	NA	19802	76	24
NVE18847	APPQSIPATGFNFGS	APPQSIPATGFNFGS		25.62	1489.72	-0.5	745.867	58.14	NA	NA	0	NA	490	15
NVE19082	TEKNIDQGPNPEINYKHVKDFFKSQQASSIVDVPKAV	TEKNIDQGPNPEINYKHVKDFFKSQQASSIVDVPKAV		44.87	4170.14	-2.5	696.029	58.64	NA	NA	189180	575160	767	37
NVE19548	QEEFEKEPTQDFAALQRI	Q(-17.03)EEFEKEPTQDFAALQRI	Pyro-glu from Q	42.78	2161.03	1.4	1081.53	62.84	NA	NA	28855	NA	87	18
NVE20161	ATPTAEELGLKGWEVYFNAWTTAGRRNIVVATYGILFGGYFLYKSRKAKPASTAQ	ATPTAEELGLKGWEVYFNAWTTAGRRNIVVATYGILFGGYFLYKSRKAKPASTAQ		22.66	6068.17	0.5	1012.37	95.07	NA	NA	NA	0	75	55
NVE20303	AGDDAPRAVFPSIV	AGDDAPRAVFPSIV		22.39	1413.73	1.7	707.871	61.17	0	NA	NA	NA	197	14
NVE20305	AGDDAPRAVFPSIV	AGDDAPRAVFPSIV		22.39	1413.73	1.7	707.871	61.17	0	NA	NA	NA	176	14
NVE21004	VLDDAVENVSGNEKHAIGMVVIRGNSIVTMEALDRVL	VLDDAVENVSGNEKHAIGMVVIRGNSIVTMEALDRVL		45.31	3963.06	1.8	793.62	73.49	159790	NA	NA	NA	60	37
NVE21426	DEDLVYTTIDCPVGIWVCQ	DEDLVYTTIDC(-1.01)PVGIWVC(-1.01)Q	Half of a disulfide bridge	30.04	2165.96	4.2	1083.99	78.92	0	NA	NA	NA	182	19
NVE21426	DLVYTTIDCPVGIWVCQ	DLVYTTIDC(-1.01)PVGIWVC(-1.01)Q	Half of a disulfide bridge	24.49	1921.9	-2.9	961.952	79.09	52011	NA	NA	NA	182	17
NVE21426	QAAMEKLDLSAF	Q(-17.03)AAMEKLDLSAF	Pyro-glu from Q	24.99	1305.63	1	653.822	67.08	NA	NA	33379	NA	182	12
NVE21658	QAQLNEGWKSANYDKGWA	Q(-17.03)AQLNEGWKSANYDKGWA	Pyro-glu from Q	40.16	2047.94	-1	1024.98	53.42	NA	NA	NA	23237	265	18
NVE21713	MPSAQLAKM	MPSAQLAKM		23.02	975.488	1.1	488.752	44.25	NA	NA	NA	140610	237	9
NVE21970	PEVYQDIQRDRRKGIKQEEIQPGNMKVWSDPFKKD	PEVYQDIQRDRRKGIKQEEIQPGNMKVWSDPFKKD		37.03	4257.18	1	710.537	50.76	NA	NA	NA	110300	46	35
NVE22000	MIDGIEAAGKNIKL	MIDGIEAAGKNIKL(-.98)	Amidation	25.21	1470.82	-1.8	736.417	52.11	NA	NA	393410	NA	73	14
NVE22351	DNIQGITKPAI	DNIQGITKPAI		32.86	1168.65	1.6	585.331	47.63	117950	56627	NA	NA	73	11
NVE22353	DNIQGITKPAI	DNIQGITKPAI		32.86	1168.65	1.6	585.331	47.63	117950	56627	NA	NA	122	11
NVE22972	APDLALLEKITRELGKNKN	APDLALLEKITRELGKNKN		39.38	2122.21	0	708.411	65.99	NA	NA	541340	NA	977	19
NVE2302	GPPQGLRWG	GPPQGLRWG		23.1	966.504	0.8	484.259	45.46	NA	NA	NA	341600	66	9
NVE2302	WENPSEKQVRENAEREVQDFKDYFKKKYN	WENPSEKQVRENAEREVQDFKDYFKKKYN		23.26	3703.8	0.3	741.768	59.32	NA	312190	NA	NA	66	29
NVE23327	MPSAQLAKM	MPSAQLAKM		23.02	975.488	1.1	488.752	44.25	NA	NA	NA	140610	238	9
NVE23858	NAAGFLVSNKFGFGLLNAHKLTTNALKW	NAAGFLVSNKFGFGLLNAHKLTTNALKW		43.26	3031.64	0.6	607.336	72.74	552300	NA	NA	NA	679	28
NVE24230	DNIQGITKPAI	DNIQGITKPAI		32.86	1168.65	1.6	585.331	47.63	117950	56627	NA	NA	172	11
NVE24290	QILGSHTLYEELTPFNDIHPRVPIVENLQKKSTIPGVPSSLQRDIS	Q(-17.03)ILGSHTLYEELTPFNDIHPRVPIVENLQKKSTIPGVPSSLQRDIS	Pyro-glu from Q	44.67	5148.72	2.7	859.13	73.59	120160	NA	0	NA	5017	46
NVE24290	QLLNYIPMSPLITGRYNIPLAHKTSEGSGSVGEIKRI	Q(-17.03)LLNYIPMSPLITGRYNIPLAHKTSEGSGSVGEIKRI	Pyro-glu from Q	28.89	4035.16	2	808.041	75.47	NA	NA	36392	NA	5017	37
NVE24305|HADP01189706.1	QQWKDAHYPSREE	Q(-17.03)QWKDAHYPSREE	Pyro-glu from Q	28.65	1655.73	1.9	828.875	37.05	NA	NA	168020	2295000	66	13
NVE24308	GPPQGLRWG	GPPQGLRWG		23.1	966.504	0.8	484.259	45.46	NA	NA	NA	341600	57	9
NVE24308	WENPSEKQVRENAEREVQDFKDYFKKKYN	WENPSEKQVRENAEREVQDFKDYFKKKYN		23.26	3703.8	0.3	741.768	59.32	NA	312190	NA	NA	57	29
NVE24308	WENPSEKQVRENAEREVQDFKDYFKKKYNRDLDI	WENPSEKQVRENAEREVQDFKDYFKKKYNRDLDI		40.53	4316.12	-0.6	617.596	62.26	18806000	1092500	1375600	124520	57	34
NVE24582	KPPKNWYW	KPPKNWYW		24.07	1117.57	1.3	559.793	48.8	NA	NA	258650	NA	471	8
NVE24610	LEMKRVFVTSTLSSDELLATIKKAGKEASYIGPA	LEMKRVFVTSTLSSDELLATIKKAGKEASYIGPA		43.95	3652.97	2.7	1218.67	69.98	6534100	NA	NA	NA	60	34
NVE2470	DNIQGITKPAI	DNIQGITKPAI		32.86	1168.65	1.6	585.331	47.63	117950	56627	NA	NA	103	11
NVE24721	EDSLGDLEYFRRRLGLES	EDSLGDLEYFRRRLGLES		29.44	2154.07	0.9	539.525	64.91	253120	NA	NA	NA	92	18
NVE24857	DNIQGITKPAI	DNIQGITKPAI		32.86	1168.65	1.6	585.331	47.63	117950	56627	NA	NA	103	11
NVE2870	AGDDAPRAVFPSIV	AGDDAPRAVFPSIV		22.39	1413.73	1.7	707.871	61.17	0	NA	NA	NA	376	14
NVE2880	DNIQGITKPAI	DNIQGITKPAI		32.86	1168.65	1.6	585.331	47.63	117950	56627	NA	NA	103	11
NVE2973	EFEPKNALKNDNAPPGNGEGEAGFIPWFS	EFEPKNALKNDNAPPGNGEGEAGFIPWFS(-.98)	Amidation	28.1	3130.48	-1.2	1044.5	68.01	2635800	3769300	NA	NA	253	29
NVE2973	ELIPKIVLQNDNAPPGNGEGEAGFIPWFS	ELIPKIVLQNDNAPPGNGEGEAGFIPWFS(-.98)	Amidation	36.19	3107.57	1	1036.87	78.14	27060000	15568000	27079	383320	253	29
NVE2974	ELIPKIVLQNDNAPPGNGEGEAGFIPWFS	ELIPKIVLQNDNAPPGNGEGEAGFIPWFS(-.98)	Amidation	36.19	3107.57	1	1036.87	78.14	27060000	15568000	27079	383320	221	29
NVE339	EANLRPLSPENHADALKDAIARKSPVLKNF	EANLRPLSPENHADALKDAIARKSPVLKNF		29.13	3313.79	1.5	829.456	56.2	NA	NA	NA	375280	219	30
NVE339	KINKGMIKKLLEH	KINKGMIKKLLEH		25.61	1550.93	0.7	388.741	42.45	NA	NA	NA	26128	219	13
NVE339	RPLSPENHADALKDAIA	RPLSPENHADALKDAIA		36.34	1816.94	0.7	606.655	43.55	NA	NA	NA	152980	219	17
NVE3482	QLPPAIQALTGTDLSGVLNKIPGARQA	QLPPAIQALTGTDLSGVLNKIPGARQA		24.47	2728.52	0.7	910.516	77.63	NA	NA	423120	NA	378	27
NVE3865	EYEEEIREGLEAAMRFPKSPFDAQAMMRPA	EYEEEIREGLEAAMRFPKSPFDAQAMMRPA		45.62	3498.64	2	700.736	72.41	123520	121270	NA	NA	71	30
NVE3865	LSREYEEEIREGLEAAMRFPKSPFDAQAMMRPA	LSREYEEEIREGLEAAMRFPKSPFDAQAMMRPA		52.09	3854.85	-0.1	771.978	73.13	4029900	3208000	NA	NA	71	33
NVE3865	SREYEEEIREGLEAAMRFPKSPFDAQAMMRPA	SREYEEEIREGLEAAMRFPKSPFDAQAMMRPA		41.35	3741.77	4.6	749.365	71.01	129490	NA	NA	NA	71	32
NVE4012|Nvec_XP_032233649.1	EDIPSDDDQLMFRPGRNEEQLFRP	EDIPSDDDQLMFRPGRNEEQLFRP(-.98)	Amidation	28.53	2902.37	0.7	726.6	57.4	NA	70794	0	NA	269	24
NVE4068	AGDDAPRAVFPSIV	AGDDAPRAVFPSIV		22.39	1413.73	1.7	707.871	61.17	0	NA	NA	NA	107	14
NVE4601	IPPQGFRFNQWG	IPPQGFRFNQWG		23.37	1445.72	-1.5	723.866	58.27	1156600	NA	NA	NA	238	12
NVE4601	IPPQGLRFSQWG	IPPQGLRFSQWG		27.65	1384.73	4.2	693.373	56.99	NA	NA	NA	603160	238	12
NVE4601	KLINQVMI	KLINQVMI		21.63	957.568	1.1	479.792	53.91	119280	NA	NA	NA	238	8
NVE5329	ARNDDIVYTTIDCPPGIWVCKK	ARNDDIVYTTIDC(-1.01)PPGIWVC(-1.01)KK	Half of a disulfide bridge	30.86	2504.22	-2.4	835.745	63.55	0	NA	NA	NA	138	22
NVE5329	VPARNDDIVYTTIDCPPGIWVCKKRRSEIAQPV	VPARNDDIVYTTIDC(-1.01)PPGIWVC(-1.01)KKRRSEIAQPV	Half of a disulfide bridge	28.87	3736.92	0.2	935.237	60.66	97127	NA	NA	NA	138	33
NVE5400	HTETQEKNPLPTKETIEQEKQG	HTETQEKNPLPTKETIEQEKQG		37.11	2564.27	3.8	642.078	40.7	NA	147080	NA	NA	41	22
NVE5400	TETQEKNPLPTKETIEQEKQG	TETQEKNPLPTKETIEQEKQG		23.31	2427.21	1.4	810.079	37.14	107180	NA	NA	NA	41	21
NVE5882	FVTGETVSRL	FVTGETVSRL		21.61	1107.59	-0.9	554.803	46.59	0	NA	NA	NA	1075	10
NVE6207	ESREPAQQPISTDNTDDLDFEDGLRAKLLRMLRKQPQ	E(-18.01)SREPAQQPISTDNTDDLDFEDGLRAKLLRMLRKQPQ	Pyro-glu from E	35.64	4292.16	-2.3	859.437	66.5	0	NA	NA	NA	76	37
NVE6394	AGDDAPRAVFPSIV	AGDDAPRAVFPSIV		22.39	1413.73	1.7	707.871	61.17	0	NA	NA	NA	377	14
NVE6636	QVRISETTDPWVWEPKRQRLAKV	Q(-17.03)VRISETTDPWVWEPKRQRLAKV(-.98)	Pyro-glu from Q; Amidation	43.78	2803.52	0.2	561.712	55.54	125090	82129	NA	661610	158	23
NVE7357	SVEDVPKVPLPFL	SVEDVPKVPLPFL		33.52	1438.81	1.2	720.412	76.23	NA	171440	NA	NA	206	13
NVE7509	SPNKLPTFNL	SPNKLPTFNL		24.23	1129.61	2.4	565.815	58.82	NA	NA	49764	NA	563	10
NVE7520	QAVSRKANALHDDLPLFGPKEGSGPNPREFTEEQLKAAKAKGALR	QAVSRKANALHDDLPLFGPKEGSGPNPREFTEEQLKAAKAKGALR		34.43	4841.57	1.5	807.937	54.27	NA	NA	589770	324830	176	45
NVE7549|Nvec_RFamide	MPEQDANPQTRFDG	MPEQDANPQTRFDG		29.96	1604.69	2.1	803.353	38.11	181110	NA	81988	253850	396	14
NVE7771	APPGGASHIVLG	APPGGASHIVLG		22.7	1074.58	0.9	538.299	43.87	NA	NA	1316600	NA	130	12
NVE7965	EDDGKSAFLKGLAQLEKDRTVGFSAGLGRLTDGRD	EDDGKSAFLKGLAQLEKDRTVGFSAGLGRLTDGRD		52.18	3721.9	1.4	621.325	66.15	1281300	NA	NA	NA	380	35
NVE7965	SEDDGKSAFLKGLAQLEKDRTVGFSAGLGRLTDGRD	SEDDGKSAFLKGLAQLEKDRTVGFSAGLGRLTDGRD		62.85	3808.93	1.4	635.831	65.97	4277400	1404100	NA	NA	380	36
NVE8677	SYPFTSTKPELVDQHKAEMEIDSKPVNTE	SYPFTSTKPELVDQHKAEMEIDSKPVNTE		25.96	3319.59	4.2	830.909	50.58	NA	NA	19405	NA	136	29
NVE9233	LDSLKRLKAKARPQMYRYQEVTNT	LDSLKRLKAKARPQMYRYQEVTNT		28.94	2908.57	3.5	582.723	42.12	NA	NA	NA	19802	114	24
NVE9858	GAPGLWGREAGAPGLW	GAPGLWGREAGAPGLW(-.98)	Amidation	40.69	1592.82	-2.5	797.416	62.8	NA	0	NA	0	296	16
NVE9858	GPPGLWGKRVAGPPGLW	GPPGLWGKRVAGPPGLW(-.98)	Amidation	29.43	1742.97	3.7	582	60.81	NA	NA	NA	60723	296	17
NVE9858	QAGAPGLWGREAGAPGLW	Q(-17.03)AGAPGLWGREAGAPGLW(-.98)	Pyro-glu from Q; Amidation	38.5	1774.89	-0.8	888.452	68.28	NA	NA	NA	32450	296	18
NVE9896	YKNGEMVDEVVGASESKLKELFAKHNK	YKNGEMVDEVVGASESKLKELFAKHNK		34.3	3049.55	0.4	610.918	66.24	NA	NA	NA	128790	33	27
NVE9956|HADO01002733.1	REAMGGQDPLVQLAQGPDSDDLWRARMAYLRA	REAM(+15.99)GGQDPLVQLAQGPDSDDLWRARM(+15.99)AYLRA(-.98)	Oxidation (M); Amidation	24.22	3616.76	-4.9	724.356	63.84	0	NA	NA	NA	79	32
NVE9956|HADO01002733.1	REAMGGQDPLVQLAQGPDSDDLWRARMAYLRA	REAMGGQDPLVQLAQGPDSDDLWRARMAYLRA		54.91	3585.76	0	718.159	66.11	5818100	3289800	NA	NA	79	32
NVE9956|HADO01002733.1	REAMGGQDPLVQLAQGPDSDDLWRARMAYLRA	REAM(+15.99)GGQDPLVQLAQGPDSDDLWRARM(+15.99)AYLRA	Oxidation (M)	48.55	3617.75	1.2	724.558	64.58	416810	665650	NA	NA	79	32
NVE9956|HADO01002733.1	REAMGGQDPLVQLAQGPDSDDLWRARMAYLRA	REAMGGQDPLVQLAQGPDSDDLWRARM(+15.99)AYLRA	Oxidation (M)	51.58	3601.75	0.2	721.358	64.83	6731800	7650100	NA	NA	79	32
NVE9956|HADO01002733.1	REAMGGQDPLVQLAQGPDSDDLWRARMAYLRA	REAMGGQDPLVQLAQGPDSDDLWRARM(+15.99)AYLRA(-.98)	Oxidation (M); Amidation	22.22	3600.77	-2.5	721.159	63.65	0	NA	NA	NA	79	32
NVE9956|HADO01002733.1	REAMGGQDPLVQLAQGPDSDDLWRARMAYLRA	REAM(+15.99)GGQDPLVQLAQGPDSDDLWRARMAYLRA	Oxidation (M)	43.38	3601.75	-1.1	721.357	65.68	NA	4786400	NA	NA	79	32
Nvec_comp12848_Phoenixin	PEVYQDIQRDRRKGIKQEEIQPGNMKVWSDPFKKD	PEVYQDIQRDRRKGIKQEEIQPGNMKVWSDPFKKD		37.03	4257.18	1	710.537	50.76	NA	NA	NA	110300	67	35
Nvec_GLWamide	GAPGLWGREAGAPGLW	GAPGLWGREAGAPGLW(-.98)	Amidation	40.69	1592.82	-2.5	797.416	62.8	NA	0	NA	0	347	16
Nvec_GLWamide	GAPGLWGREANAPGLW	GAPGLWGREANAPGLW(-.98)	Amidation	26.96	1649.84	-1.7	825.927	62.13	24149	NA	NA	NA	347	16
Nvec_GLWamide	GPPGLWGKRVAGPPGLW	GPPGLWGKRVAGPPGLW(-.98)	Amidation	29.43	1742.97	3.7	582	60.81	NA	NA	NA	60723	347	17
Nvec_GLWamide	QAGAPGLWGREAGAPGLW	Q(-17.03)AGAPGLWGREAGAPGLW(-.98)	Pyro-glu from Q; Amidation	38.5	1774.89	-0.8	888.452	68.28	NA	NA	NA	32450	347	18
Nvec_HIRamide	ASDEKRDSKQPPIDLSPAAYFHIR	ASDEKRDSKQPPIDLSPAAYFHIR(-.98)	Amidation	46.64	2739.41	2.1	548.89	59.11	646600	941410	NA	NA	240	24
Nvec_HIRamide	EQPPYLDLTPSYFHIR	EQPPYLDLTPSYFHIR(-.98)	Amidation	33.98	1974	-1.9	659.006	64.52	NA	NA	NA	26973	240	16
Nvec_HIRamide	GPAYFHIR	GPAYFHIR(-.98)	Amidation	21.95	958.514	-1.1	480.264	59.9	NA	NA	NA	0	240	8
Nvec_HIRamide	KNPPIDLGPAYFHIR	KNPPIDLGPAYFHIR(-.98)	Amidation	34.9	1735.95	-0.4	579.658	55.91	NA	NA	NA	29025	240	15
Nvec_HIRamide	NPPIDLGPAYFHIRG	NPPIDLGPAYFHIRG		27.33	1665.86	-0.2	556.295	61.44	NA	30219	NA	NA	240	15
Nvec_HIRamide	SSEQPPLDLGPAYFHIRGKRTKNPPIDLGPAYFHIR	SSEQPPLDLGPAYFHIRGKRTKNPPIDLGPAYFHIR(-.98)	Amidation	43.87	4086.17	1.6	584.747	64.53	NA	0	NA	NA	240	36
Nvec_QWamide	IPPQGFRFNQWG	IPPQGFRFNQWG		23.37	1445.72	-1.5	723.866	58.27	1156600	NA	NA	NA	325	12
Nvec_QWamide	IPPQGLRFSQWG	IPPQGLRFSQWG		27.65	1384.73	4.2	693.373	56.99	NA	NA	NA	603160	325	12
Nvec_QWamide	KLINQVMI	KLINQVMI		21.63	957.568	1.1	479.792	53.91	119280	NA	NA	NA	325	8
NVEC200_000005_1.1	NTPVELRPMQIRTFKATLRM	NTPVELRPMQIRTFKATLRM		33.31	2401.31	0	481.269	58.37	NA	509460	1933700	NA	1018	20
NVEC200_000005_1.1	NTPVELRPMQIRTFKATLRMK	NTPVELRPMQIRTFKATLRMK		30.14	2529.4	1.9	506.889	54.28	NA	NA	1000900	95384	1018	21
NVEC200_000296_1.1	GAPGLWGREAGAPGLW	GAPGLWGREAGAPGLW(-.98)	Amidation	40.69	1592.82	-2.5	797.416	62.8	NA	0	NA	0	419	16
NVEC200_000296_1.1	GAPGLWGREANAPGLW	GAPGLWGREANAPGLW(-.98)	Amidation	26.96	1649.84	-1.7	825.927	62.13	24149	NA	NA	NA	419	16
NVEC200_000296_1.1	GPPGLWGKRVAGPPGLW	GPPGLWGKRVAGPPGLW(-.98)	Amidation	29.43	1742.97	3.7	582	60.81	NA	NA	NA	60723	419	17
NVEC200_000296_1.1	QAGAPGLWGREAGAPGLW	Q(-17.03)AGAPGLWGREAGAPGLW(-.98)	Pyro-glu from Q; Amidation	38.5	1774.89	-0.8	888.452	68.28	NA	NA	NA	32450	419	18
NVEC200_000672_1.1	TEKNIDQGPNPEINYKHVKDFFKSQQASSIVDVPKAV	TEKNIDQGPNPEINYKHVKDFFKSQQASSIVDVPKAV		44.87	4170.14	-2.5	696.029	58.64	NA	NA	189180	575160	838	37
NVEC200_002800_1.1|Nvec_VRHamide	GGPPPIYLPVRPG	GGPPPIYLPVRPG		31.15	1318.74	1.2	660.378	58.64	NA	NA	NA	37385	121	13
NVEC200_002800_1.1|Nvec_VRHamide	GPPPIYLPVRP	GPPPIYLPVRP		24.88	1204.7	0.6	603.356	60.99	NA	NA	401550	NA	121	11
NVEC200_002800_1.1|Nvec_VRHamide	GPPPIYLPVRP	GPPPIYLPVRP(-.98)	Amidation	44.59	1203.71	0.2	402.245	57.98	188640000	132350000	82960000	187200000	121	11
NVEC200_002800_1.1|Nvec_VRHamide	ITDPGDLEKPQENDEPGPPMIKIPVRH	ITDPGDLEKPQENDEPGPPMIKIPVRH(-.98)	Amidation	22.71	3020.54	1.1	605.116	51.41	0	NA	NA	NA	121	27
NVEC200_003938_1.1	ISPSSEEQWKRAKKGESIRPSDEQLPSIGGGLDPSFGSSHHEF	ISPSSEEQWKRAKKGESIRPSDEQLPSIGGGLDPSFGSSHHEF		27.81	4693.28	0.9	939.664	54.51	138200	NA	NA	NA	1775	43
NVEC200_003938_1.1	LDPSFGSSHHEF	LDPSFGSSHHEF		22.65	1358.59	1.1	680.303	43.93	25622	NA	NA	NA	1775	12
NVEC200_004380_1.1	QAPPPEQQSYPMQ	QAPPPEQQSYPMQ		23.03	1499.67	2.2	750.845	37.32	NA	NA	708620	NA	201	13
NVEC200_004626_1.1	SPPELPDVMKPQEGISNSDGS	SPPELPDVMKPQEGISNSDGS		30.93	2183.01	-3.4	1092.51	53.6	NA	NA	14924	NA	130	21
NVEC200_004699_1.1	KPPKNWYW	KPPKNWYW		24.07	1117.57	1.3	559.793	48.8	NA	NA	258650	NA	669	8
NVEC200_005035_1.1	EFEPKKALKNDNAPPGNEEGEARFIPWFS	EFEPKKALKNDNAPPGNEEGEARFIPWFS(-.98)	Amidation	36.53	3315.63	2.7	664.135	61.62	1290500	1461400	NA	NA	301	29
NVEC200_005035_1.1	EFEPKNALKNDNAPPGNGEGEAGFIPWFS	EFEPKNALKNDNAPPGNGEGEAGFIPWFS(-.98)	Amidation	28.1	3130.48	-1.2	1044.5	68.01	2635800	3769300	NA	NA	301	29
NVEC200_005035_1.1	ELIPKIVLQNDNAPPGNGEGEAGFIPWFS	ELIPKIVLQNDNAPPGNGEGEAGFIPWFS(-.98)	Amidation	36.19	3107.57	1	1036.87	78.14	27060000	15568000	27079	383320	301	29
NVEC200_005035_1.1	QNDLVPPSKGAGEQGFIPWFS	Q(-17.03)NDLVPPSKGAGEQGFIPWFS(-.98)	Pyro-glu from Q; Amidation	31.94	2255.1	2.4	1128.56	74.48	71796	69894	NA	NA	301	21
NVEC200_005035_1.1	TVNRLKEINTENDADANKAPPSGHNEAGFIPWFA	TVNRLKEINTENDADANKAPPSGHNEAGFIPWFA(-.98)	Amidation	43.61	3721.82	-0.5	745.372	62.31	7537600	6903700	NA	NA	301	34
NVEC200_005035_1.1	TVNRLKEINTENDADANKAPPSGHNEAGFIPWFAGKRKV	TVNRLKEINTENDADANKAPPSGHNEAGFIPWFAGKRKV		43.52	4291.19	-1.6	716.204	58.83	1337500	1444000	NA	NA	301	39
NVEC200_005266_1.1	APDLALLEKITRELGKNKN	APDLALLEKITRELGKNKN		39.38	2122.21	0	708.411	65.99	NA	NA	541340	NA	1464	19
NVEC200_005480_1.1	PPSMPAPPSP	PPSMPAPPSP		23.38	976.469	4.8	489.244	41.47	NA	62214	NA	NA	2251	10
NVEC200_005515_1.1	QTKEQVICEGPAKLALESYHIDLSKSHLCGENS	Q(-17.03)TKEQVIC(-1.01)EGPAKLALESYHIDLSKSHLC(-1.01)GENS	Pyro-glu from Q; Half of a disulfide bridge	31.61	3607.73	0.9	902.94	66.59	86358000	36184000	6585200	19243000	175	33
NVEC200_005515_1.1	QTKEQVICEGPAKLALESYHIDLSKSHLCGENS	Q(-17.03)TKEQVICEGPAKLALESYHIDLSKSHLC(-1.01)GENS(-.98)	Pyro-glu from Q; Half of a disulfide bridge; Amidation	28.21	3607.75	-5.1	902.941	67.49	NA	NA	0	NA	175	33
NVEC200_005515_1.1	WANDFKSFL	WANDFKSFL		25.82	1126.54	1	564.28	63.58	NA	55282	NA	49782	175	9
NVEC200_005559_1.1	IYRSAVIGAEPYNEPELPGGRHPNDDKRYTIQQLNLAARHRNVYFDRAGADPYGIGSPIISSR	IYRSAVIGAEPYNEPELPGGRHPNDDKRYTIQQLNLAARHRNVYFDRAGADPYGIGSPIISSR(-.98)	Amidation	28.17	7049.59	2.2	1008.09	57.87	NA	NA	NA	0	173	63
NVEC200_005559_1.1	YRSAVIGAEPYNEPELPGGRHPNDDKRYTIQQLNLAARHRNVYFDRAGADPYGIGSPIISSR	YRSAVIGAEPYNEPELPGGRHPNDDKRYTIQQLNLAARHRNVYFDRAGADPYGIGSPIISSR(-.98)	Amidation	24.26	6936.51	0.5	868.072	57.56	NA	NA	0	NA	173	62
NVEC200_006106_1.1	KPADTPMRVSSLPTVTEEESVLT	KPADTPMRVSSLPTVTEEESVLT		32.88	2486.26	-0.2	829.76	58.31	NA	NA	84174	NA	615	23
NVEC200_008652_1.1	LISHPRVIWAKQQRILDRQ	LISHPRVIWAKQQRILDRQ		35.31	2356.36	2.7	472.281	44.82	147810	NA	145570	NA	757	19
NVEC200_008914_1.1	EDDGKSAFLKGLAQLEKDRTVGFSAGLGRLTDGRD	EDDGKSAFLKGLAQLEKDRTVGFSAGLGRLTDGRD		52.18	3721.9	1.4	621.325	66.15	1281300	NA	NA	NA	382	35
NVEC200_008914_1.1	SEDDGKSAFLKGLAQLEKDRTVGFSAGLGRLTDGRD	SEDDGKSAFLKGLAQLEKDRTVGFSAGLGRLTDGRD		62.85	3808.93	1.4	635.831	65.97	4277400	1404100	NA	NA	382	36
NVEC200_009244_1.1	MRPVTDKMAANHPLLTGQRVLDALFPCVQGGTTAIPGAFGC	MRPVTDKMAANHPLLTGQRVLDALFPCVQGGTTAIPGAFGC(-1.01)	Half of a disulfide bridge	25.04	4252.13	2	1418.39	86.02	NA	NA	0	NA	621	41
NVEC200_009895_1.1	IPPQGFRFNQWG	IPPQGFRFNQWG		23.37	1445.72	-1.5	723.866	58.27	1156600	NA	NA	NA	294	12
NVEC200_009895_1.1	IPPQGLRFSQWG	IPPQGLRFSQWG		27.65	1384.73	4.2	693.373	56.99	NA	NA	NA	603160	294	12
NVEC200_009895_1.1	KLINQVMI	KLINQVMI		21.63	957.568	1.1	479.792	53.91	119280	NA	NA	NA	294	8
NVEC200_010517_1.1	QAQLNEGWKSANYDKGWA	Q(-17.03)AQLNEGWKSANYDKGWA	Pyro-glu from Q	40.16	2047.94	-1	1024.98	53.42	NA	NA	NA	23237	282	18
NVEC200_010517_1.1	QVRISETTDPWVWEPKRQRLAKV	Q(-17.03)VRISETTDPWVWEPKRQRLAKV(-.98)	Pyro-glu from Q; Amidation	43.78	2803.52	0.2	561.712	55.54	125090	82129	NA	661610	282	23
NVEC200_012385_1.1	QDTSLASSDKLSRKNAGAPCVGKDCEE	Q(-17.03)DTSLASSDKLSRKNAGAPC(-1.01)VGKDC(-1.01)EE	Pyro-glu from Q; Half of a disulfide bridge	29.76	2789.26	1.7	698.323	40.12	187830	NA	NA	62155	434	27
NVEC200_012480_1.1	AEPAAPSSDWGTAVTMQEQAKPSTDWA	AEPAAPSSDWGTAVTMQEQAKPSTDWA		37.06	2831.27	-1.3	944.763	57.48	NA	NA	113620	NA	391	27
NVEC200_012734_1.1	AGDDAPRAVFPSIV	AGDDAPRAVFPSIV		22.39	1413.73	1.7	707.871	61.17	0	NA	NA	NA	133	14
NVEC200_012735_1.1	AGDDAPRAVFPSIV	AGDDAPRAVFPSIV		22.39	1413.73	1.7	707.871	61.17	0	NA	NA	NA	376	14
NVEC200_013180_1.1	AGDDAPRAVFPSIV	AGDDAPRAVFPSIV		22.39	1413.73	1.7	707.871	61.17	0	NA	NA	NA	375	14
NVEC200_013206_1.1	ASDEKRDSKQPPIDLSPAAYFHIR	ASDEKRDSKQPPIDLSPAAYFHIR(-.98)	Amidation	46.64	2739.41	2.1	548.89	59.11	646600	941410	NA	NA	240	24
NVEC200_013206_1.1	EQPPYLDLTPSYFHIR	EQPPYLDLTPSYFHIR(-.98)	Amidation	33.98	1974	-1.9	659.006	64.52	NA	NA	NA	26973	240	16
NVEC200_013206_1.1	GPAYFHIR	GPAYFHIR(-.98)	Amidation	21.95	958.514	-1.1	480.264	59.9	NA	NA	NA	0	240	8
NVEC200_013206_1.1	KNPPIDLGPAYFHIR	KNPPIDLGPAYFHIR(-.98)	Amidation	34.9	1735.95	-0.4	579.658	55.91	NA	NA	NA	29025	240	15
NVEC200_013206_1.1	NPPIDLGPAYFHIRG	NPPIDLGPAYFHIRG		27.33	1665.86	-0.2	556.295	61.44	NA	30219	NA	NA	240	15
NVEC200_013206_1.1	SSEQPPLDLGPAYFHIRGKRTKNPPIDLGPAYFHIR	SSEQPPLDLGPAYFHIRGKRTKNPPIDLGPAYFHIR(-.98)	Amidation	43.87	4086.17	1.6	584.747	64.53	NA	0	NA	NA	240	36
NVEC200_014051_1.1	SPNKLPTFNL	SPNKLPTFNL		24.23	1129.61	2.4	565.815	58.82	NA	NA	49764	NA	592	10
NVEC200_014058_1.1	QAVSRKANALHDDLPLFGPKEGSGPNPREFTEEQLKAAKAKGALR	QAVSRKANALHDDLPLFGPKEGSGPNPREFTEEQLKAAKAKGALR		34.43	4841.57	1.5	807.937	54.27	NA	NA	589770	324830	178	45
NVEC200_014078_1.1	MPEQDANPQTRFDG	MPEQDANPQTRFDG		29.96	1604.69	2.1	803.353	38.11	181110	NA	81988	253850	412	14
NVEC200_014617_1.1	APPQSIPATGFNFGS	APPQSIPATGFNFGS		25.62	1489.72	-0.5	745.867	58.14	NA	NA	0	NA	524	15

## Sheet: SignalP
ID	Prediction	OTHER	SP(Sec/SPI)	Position
HADP01211238.1	SP	0.000202	0.999757	CS pos: 23-24. Pr: 0.9594
HADP01262889.1	SP	0.000181	0.999818	CS pos: 26-27. Pr: 0.9753
NVE1038	SP	0.002352	0.997639	CS pos: 21-22. Pr: 0.8546
NVE10634	SP	0.000213	0.999752	CS pos: 22-23. Pr: 0.9676
NVE11072	SP	0.000229	0.999762	CS pos: 17-18. Pr: 0.9764
NVE11178_HADP01056499.1	SP	0.000205	0.999769	CS pos: 25-26. Pr: 0.9778
NVE11271	NO_SP	1.00007	0
NVE11271	SP	0.000228	0.999756	CS pos: 20-21. Pr: 0.9852
NVE12327	SP	0.000196	0.999764	CS pos: 21-22. Pr: 0.9816
NVE12742	SP	0.000276	0.999729	CS pos: 21-22. Pr: 0.8659
NVE12918_HADO01001257.1	SP	0.000214	0.999771	CS pos: 24-25. Pr: 0.9715
NVE13034	NO_SP	1.00007	1e-06
NVE13213	SP	0.000365	0.99963	CS pos: 19-20. Pr: 0.9793
NVE13685	SP	0.00021	0.999765	CS pos: 19-20. Pr: 0.9789
NVE1473	SP	0.000374	0.999597	CS pos: 17-18. Pr: 0.9313
NVE15069	SP	0.00027	0.999701	CS pos: 18-19. Pr: 0.9849
NVE15078	NO_SP	0.987574	0.012442
NVE15340	SP	0.000301	0.999664	CS pos: 21-22. Pr: 0.977
NVE15505	SP	0.000269	0.999718	CS pos: 23-24. Pr: 0.9409
NVE15529	SP	0.000199	0.999767	CS pos: 16-17. Pr: 0.9819
NVE15666	SP	0.000272	0.999708	CS pos: 29-30. Pr: 0.667
NVE15677	NO_SP	1.00008	0
NVE16146	NO_SP	1.00005	0
NVE16210	NO_SP	1.00003	1e-06
NVE16920	SP	0.000275	0.999694	CS pos: 18-19. Pr: 0.9776
NVE17328_HADO01000428.1	SP	0.000203	0.999779	CS pos: 26-27. Pr: 0.9751
NVE17329	SP	0.000202	0.999782	CS pos: 26-27. Pr: 0.9655
NVE18016	NO_SP	1.00005	0
NVE18122	SP	0.000248	0.999735	CS pos: 22-23. Pr: 0.9795
NVE1820	NO_SP	1.00005	0
NVE18646	SP	0.000229	0.999733	CS pos: 25-26. Pr: 0.9743
NVE18847	NO_SP	1.00006	0
NVE19082	SP	0.000185	0.999776	CS pos: 25-26. Pr: 0.9769
NVE19548	SP	0.000176	0.999773	CS pos: 19-20. Pr: 0.9795
NVE20161	NO_SP	0.999901	0.000122
NVE20303	NO_SP	1.00005	0
NVE20305	NO_SP	1.00005	0
NVE21004	NO_SP	1.00004	0
NVE21167	SP	0.000236	0.999738	CS pos: 20-21. Pr: 0.9762
NVE21426	SP	0.000219	0.999775	CS pos: 20-21. Pr: 0.9808
NVE21658	NO_SP	1.00005	0
NVE21713	SP	0.000213	0.999763	CS pos: 19-20. Pr: 0.961
NVE21750	SP	0.000261	0.999701	CS pos: 17-18. Pr: 0.9798
NVE21970	NO_SP	1.00001	1e-06
NVE22000	NO_SP	1.00008	0
NVE22351	NO_SP	1.00008	0
NVE22353	NO_SP	1.00008	0
NVE22506	NO_SP	1.00003	1.3e-05
NVE226	SP	0.000236	0.999731	CS pos: 25-26. Pr: 0.9754
NVE22972	NO_SP	1.00005	0
NVE2302	SP	0.000198	0.999807	CS pos: 26-27. Pr: 0.9749
NVE23327	SP	0.000214	0.999777	CS pos: 19-20. Pr: 0.9543
NVE23858	SP	0.000329	0.999651	CS pos: 19-20. Pr: 0.6607
NVE24230	NO_SP	1.00005	0
NVE24290	NO_SP	1.00004	0
NVE24305_HADP01189706.1	SP	0.000199	0.999788	CS pos: 26-27. Pr: 0.9774
NVE24307_HADP01080760.1	SP	0.000207	0.99978	CS pos: 26-27. Pr: 0.9772
NVE24308	NO_SP	1.00001	2.3e-05
NVE24582	SP	0.000261	0.999695	CS pos: 23-24. Pr: 0.9689
NVE24610	NO_SP	1.00004	0
NVE2470	NO_SP	1.00008	0
NVE24721	SP	0.000211	0.999748	CS pos: 21-22. Pr: 0.9801
NVE24857	NO_SP	1.00004	0
NVE26068	SP	0.000215	0.999768	CS pos: 23-24. Pr: 0.9687
NVE2870	NO_SP	1.00005	0
NVE2880	NO_SP	1.00005	0
NVE2973	SP	0.000282	0.999695	CS pos: 23-24. Pr: 0.9756
NVE2974	SP	0.00027	0.999732	CS pos: 23-24. Pr: 0.9758
NVE339	SP	0.000216	0.999741	CS pos: 19-20. Pr: 0.9808
NVE3482	NO_SP	1.00007	0
NVE3755	SP	0.000206	0.999736	CS pos: 19-20. Pr: 0.9822
NVE3865	SP	0.000204	0.999801	CS pos: 21-22. Pr: 0.9844
NVE3868	SP	0.000205	0.99979	CS pos: 23-24. Pr: 0.9837
NVE4012_Nvec_XP_032233649.1	SP	0.000304	0.999671	CS pos: 20-21. Pr: 0.9786
NVE4068	NO_SP	1.00006	0
NVE4601	NO_SP	1.00008	0
NVE4782	SP	0.000237	0.99974	CS pos: 20-21. Pr: 0.9809
NVE4853	NO_SP	1.00006	0
NVE5329	SP	0.000215	0.999748	CS pos: 20-21. Pr: 0.9807
NVE5400	NO_SP	1.00001	2e-06
NVE5454	SP	0.000231	0.999751	CS pos: 22-23. Pr: 0.9805
NVE5882	SP	0.006639	0.993364	CS pos: 22-23. Pr: 0.9284
NVE6207	SP	0.00022	0.999746	CS pos: 24-25. Pr: 0.9797
NVE6394	NO_SP	1.00003	0
NVE6636	SP	0.000191	0.999765	CS pos: 20-21. Pr: 0.9815
NVE7357	SP	0.000207	0.99977	CS pos: 15-16. Pr: 0.9814
NVE7509	NO_SP	1.00005	0
NVE7520	NO_SP	1.00008	1e-06
NVE7549_Nvec_RFamide	SP	0.000232	0.999735	CS pos: 22-23. Pr: 0.9746
NVE7771	NO_SP	1.00005	0
NVE7965	SP	0.000338	0.999626	CS pos: 16-17. Pr: 0.951
NVE8232	SP	0.000198	0.999789	CS pos: 23-24. Pr: 0.9817
NVE8376	NO_SP	0.999469	0.000538
NVE8677	NO_SP	1.00006	0
NVE8927	SP	0.00021	0.99976	CS pos: 20-21. Pr: 0.9771
NVE897	NO_SP	1.00003	1e-06
NVE9107	SP	0.000253	0.99972	CS pos: 19-20. Pr: 0.9782
NVE9233	NO_SP	0.943335	0.056651
NVE9858	NO_SP	0.999179	0.000853
NVE9896	NO_SP	0.999986	1.4e-05
NVE9956_HADO01002733.1	SP	0.000351	0.999614	CS pos: 25-26. Pr: 0.963
Nvec_comp12848_Phoenixin	NO_SP	0.996291	0.003738
Nvec_GLWamide	SP	0.000278	0.999687	CS pos: 20-21. Pr: 0.9786
Nvec_HIRamide	SP	0.000279	0.999728	CS pos: 18-19. Pr: 0.9849
Nvec_QWamide	NO_SP	1.00006	0
Nvec_RPamide_EDO37503.p1	SP	0.000207	0.999735	CS pos: 19-20. Pr: 0.9821
NVEC200_000005_1.1	SP	0.000328	0.999642	CS pos: 25-26. Pr: 0.9744
NVEC200_000296_1.1	NO_SP	0.640765	0.359236
NVEC200_000672_1.1	NO_SP	0.994946	0.005033
NVEC200_002782_1.1	NO_SP	1.00007	0
NVEC200_002800_1.1_Nvec_VRHamide	SP	0.000149	0.999867	CS pos: 21-22. Pr: 0.8851
NVEC200_002806_1.1	SP	0.188434	0.811554	CS pos: 46-47. Pr: 0.6329
NVEC200_003938_1.1	SP	0.000301	0.999664	CS pos: 21-22. Pr: 0.977
NVEC200_004380_1.1	NO_SP	1.00007	1e-06
NVEC200_004626_1.1	NO_SP	1.00007	0
NVEC200_004699_1.1	NO_SP	1.00003	1.7e-05
NVEC200_004815_1.1	SP	0.000261	0.999701	CS pos: 17-18. Pr: 0.9798
NVEC200_004847_1.1	SP	0.000234	0.999767	CS pos: 23-24. Pr: 0.9768
NVEC200_004869_1.1_Nvec_PRGamide	SP	0.000236	0.999731	CS pos: 25-26. Pr: 0.9754
NVEC200_005035_1.1	NO_SP	0.523945	0.476056
NVEC200_005266_1.1	NO_SP	1.00005	0
NVEC200_005480_1.1	NO_SP	1.00007	1e-06
NVEC200_005515_1.1	SP	0.000204	0.999754	CS pos: 19-20. Pr: 0.9798
NVEC200_005559_1.1	SP	0.105883	0.894096	CS pos: 17-18. Pr: 0.7508
NVEC200_006106_1.1	NO_SP	1.00006	1e-06
NVEC200_008652_1.1	NO_SP	0.999709	0.000298
NVEC200_008914_1.1	SP	0.000338	0.999626	CS pos: 16-17. Pr: 0.951
NVEC200_009244_1.1	NO_SP	1.00006	0
NVEC200_009895_1.1	SP	0.000225	0.99973	CS pos: 18-19. Pr: 0.9807
NVEC200_010517_1.1	SP	0.000249	0.999713	CS pos: 31-32. Pr: 0.9787
NVEC200_012385_1.1	SP	0.142694	0.857297	CS pos: 46-47. Pr: 0.7839
NVEC200_012480_1.1	NO_SP	0.986995	0.013006
NVEC200_012734_1.1	NO_SP	1.00005	0
NVEC200_012735_1.1	NO_SP	1.00005	0
NVEC200_013180_1.1	NO_SP	1.00006	0
NVEC200_013206_1.1	SP	0.00027	0.999701	CS pos: 18-19. Pr: 0.9849
NVEC200_013996_1.1	SP	0.00088	0.999094	CS pos: 42-43. Pr: 0.9615
NVEC200_014051_1.1	NO_SP	1.00008	0
NVEC200_014058_1.1	NO_SP	1.00003	0
NVEC200_014078_1.1	SP	0.000232	0.999735	CS pos: 22-23. Pr: 0.9746
NVEC200_014617_1.1	NO_SP	1.00006	0
NVEC200_014828_1.1	SP	0.000245	0.999746	CS
NVEC200_014828_1.1	SP	0.000245	0.999746	CS pos: 18-19. Pr: 0.98

## Sheet: Sequence-Alignments
Sequence 1	Sequence 1 Length	Sequence 2	Sequence 2 Length	Alignment_Score(%)
NVEC200_002806_1.1	112	Nvec_RPamide_EDO37503.p1	85	100
NVE2302	66	HADP01262889.1	71	100
HADP01262889.1	71	NVE24308	57	100
NVE21970	46	Nvec_comp12848_Phoenixin	67	100
NVE22972	977	NVEC200_005266_1.1	1464	99.6929
NVE19082	767	NVEC200_000672_1.1	838	99.6089
NVEC200_013206_1.1	240	Nvec_HIRamide	240	99.5833
Nvec_GLWamide	347	NVEC200_000296_1.1	419	99.4236
NVEC200_014617_1.1	524	NVE18847	490	99.3878
NVEC200_004869_1.1|Nvec_PRGamide	544	NVE226	410	99.2683
NVEC200_014078_1.1	412	NVE7549|Nvec_RFamide	396	99.2424
NVEC200_004815_1.1	248	NVE21750	248	98.7903
NVE4601	238	Nvec_QWamide	325	98.7395
NVE9233	114	NVE18646	76	98.6842
NVEC200_013206_1.1	240	NVE15069	213	98.5915
NVE13213	186	NVEC200_005515_1.1	175	98.2857
NVE15069	213	Nvec_HIRamide	240	98.1221
NVE2880	103	NVE2470	103	98.0583
NVE2470	103	NVE24857	103	98.0583
NVEC200_008914_1.1	382	NVE7965	380	97.8947
NVE13034	286	NVE18122	300	97.2028
NVEC200_012735_1.1	376	NVEC200_013180_1.1	375	97.0667
NVEC200_002806_1.1	112	NVE3755	78	96.1538
NVE3755	78	Nvec_RPamide_EDO37503.p1	85	96.1538
NVE2880	103	NVE24857	103	96.1165
NVEC200_014051_1.1	592	NVE7509	563	95.9147
NVE22351	73	NVE2470	103	95.8904
NVE22351	73	NVE22353	122	95.8904
NVE2870	376	NVEC200_012735_1.1	376	95.4787
NVE20305	176	NVEC200_013180_1.1	375	95.4545
NVE4601	238	NVEC200_009895_1.1	294	95.3782
NVE24582	471	NVEC200_004699_1.1	669	95.3291
NVE2870	376	NVEC200_013180_1.1	375	95.2
NVE1820	270	NVE20305	176	94.8864
NVE2870	376	NVE20305	176	94.8864
NVEC200_014058_1.1	178	NVE7520	176	94.8864
NVE897	234	NVEC200_014828_1.1	233	94.8498
NVE2880	103	NVE22351	73	94.5205
NVE20305	176	NVEC200_012735_1.1	376	93.75
NVE20305	176	NVE20303	197	93.75
NVE23327	238	NVE21713	237	93.2489
NVE22351	73	NVE24857	103	93.1507
NVEC200_012735_1.1	376	NVE20303	197	91.3706
NVE2302	66	NVE24308	57	91.2281
NVE6636	158	NVEC200_010517_1.1	282	91.1392
NVE20305	176	NVE6394	377	89.2045
NVE1820	270	NVE20303	197	88.8325
NVE2870	376	NVE20303	197	88.8325
NVEC200_002800_1.1|Nvec_VRHamide	121	NVE12742	70	88.5714
NVE2470	103	NVE22353	122	88.3495
NVE20303	197	NVEC200_013180_1.1	375	88.3249
NVE15505	345	NVEC200_004699_1.1	669	88.1159
NVEC200_013180_1.1	375	NVE6394	377	87.7333
NVE2470	103	NVE24230	172	87.3786
NVEC200_012735_1.1	376	NVE6394	377	87.234
Nvec_QWamide	325	NVEC200_009895_1.1	294	87.0748
NVE2870	376	NVE6394	377	86.7021
NVE2880	103	NVE22353	122	86.4078
NVE22353	122	NVE24857	103	86.4078
NVE2973	253	NVEC200_005035_1.1	301	86.166
NVE15505	345	NVE24582	471	86.087
NVE2880	103	NVE24230	172	85.4369
NVE24857	103	NVE24230	172	85.4369
NVE9858	296	NVEC200_000296_1.1	419	84.7973
Nvec_GLWamide	347	NVE9858	296	84.1216
NVE2973	253	NVE2974	221	83.7104
NVE20303	197	NVE6394	377	82.7411
NVE4068	107	NVEC200_012734_1.1	133	80.3738
NVE1820	270	NVE2870	376	79.2593
NVE1820	270	NVE4068	107	78.5047
NVE2870	376	NVE4068	107	78.5047
NVE4068	107	NVE20305	176	78.5047
NVE4068	107	NVEC200_012735_1.1	376	78.5047
NVE4068	107	NVE20303	197	78.5047
NVE4068	107	NVEC200_013180_1.1	375	78.5047
NVE22351	73	NVE24230	172	78.0822
NVE1820	270	NVEC200_012735_1.1	376	77.4074
NVEC200_003938_1.1	1775	NVE15340	1820	77.3521
NVE1820	270	NVEC200_013180_1.1	375	76.6667
NVE4068	107	NVE6394	377	74.7664
NVE1820	270	NVE6394	377	74.0741
NVE2974	221	NVEC200_005035_1.1	301	69.2308
NVE21426	182	NVE5329	138	68.1159
NVEC200_012734_1.1	133	NVEC200_013180_1.1	375	66.1654
NVE1820	270	NVEC200_012734_1.1	133	65.4135
NVE2870	376	NVEC200_012734_1.1	133	65.4135
NVE20305	176	NVEC200_012734_1.1	133	65.4135
NVE22353	122	NVE24230	172	63.9344
NVEC200_012734_1.1	133	NVEC200_012735_1.1	376	63.9098
NVEC200_012734_1.1	133	NVE6394	377	63.9098
NVEC200_012734_1.1	133	NVE20303	197	62.406
NVE24307|HADP01080760.1	69	NVE11178|HADP01056499.1	64	57.8125
NVE21658	265	NVEC200_010517_1.1	282	47.1698
NVE23858	679	NVEC200_008652_1.1	757	43.1517
NVE24305|HADP01189706.1	66	NVE24307|HADP01080760.1	69	33.3333
NVE23327	238	NVEC200_004815_1.1	248	32.7731
NVE23327	238	NVE21750	248	32.3529
NVE21713	237	NVEC200_004815_1.1	248	31.6456
NVE21713	237	NVE21750	248	31.2236
NVE21658	265	NVE6636	158	31.0127
NVE22972	977	NVE9896	33	30.303
NVEC200_005266_1.1	1464	NVE9896	33	30.303
NVE3865	71	NVE3868	74	29.5775
NVE11271	155	NVE9896	33	27.2727
NVE2302	66	NVE24307|HADP01080760.1	69	27.2727
NVEC200_003938_1.1	1775	NVE9896	33	27.2727
NVEC200_005266_1.1	1464	NVE5400	41	26.8293
NVEC200_006106_1.1	615	NVE5400	41	26.8293
NVE24290	5017	NVE5400	41	26.8293
NVE2302	66	NVE11178|HADP01056499.1	64	26.5625
HADP01262889.1	71	NVE11178|HADP01056499.1	64	26.5625
NVE24305|HADP01189706.1	66	NVE11178|HADP01056499.1	64	26.5625
HADP01262889.1	71	NVE24307|HADP01080760.1	69	26.087
NVE24307|HADP01080760.1	69	NVEC200_010517_1.1	282	26.087
NVE24290	5017	NVE22000	73	26.0274
HADP01211238.1	71	NVE9956|HADO01002733.1	79	25.3521
NVE17328|HADO01000428.1	69	NVE11178|HADP01056499.1	64	25
NVE23858	679	NVE21004	60	25
NVE1473	202	Nvec_RPamide_EDO37503.p1	85	24.7059
NVE24307|HADP01080760.1	69	NVE6636	158	24.6377
NVE24290	5017	NVE24308	57	24.5614
NVE19082	767	NVE5400	41	24.3902
NVE16210	117	NVE5400	41	24.3902
NVE5400	41	NVEC200_000672_1.1	838	24.3902
NVEC200_005480_1.1	2251	NVE9896	33	24.2424
NVE19082	767	NVE9896	33	24.2424
NVEC200_014051_1.1	592	NVE9896	33	24.2424
NVE7509	563	NVE9896	33	24.2424
NVE24290	5017	NVE9896	33	24.2424
NVE9896	33	NVEC200_013206_1.1	240	24.2424
NVE9896	33	NVE15069	213	24.2424
NVE9896	33	Nvec_HIRamide	240	24.2424
NVE9896	33	NVE9107	767	24.2424
NVE9896	33	NVE26068	123	24.2424
NVE9896	33	NVE24582	471	24.2424
NVE9896	33	NVEC200_004699_1.1	669	24.2424
NVE9896	33	NVEC200_000672_1.1	838	24.2424
HADP01262889.1	71	NVEC200_003938_1.1	1775	23.9437
NVE11072	218	NVE13685	76	23.6842
NVE5454	72	NVE8232	104	23.6111
NVE5454	72	NVEC200_008652_1.1	757	23.6111
NVE17329	78	NVE12918|HADO01001257.1	77	23.3766
NVEC200_014617_1.1	524	NVE24610	60	23.3333
NVEC200_003938_1.1	1775	NVE24610	60	23.3333
NVE15340	1820	NVE24610	60	23.3333
NVE18847	490	NVE24610	60	23.3333
NVE17328|HADO01000428.1	69	NVE1473	202	23.1884
NVE17328|HADO01000428.1	69	NVEC200_005266_1.1	1464	23.1884
Nvec_GLWamide	347	NVE17329	78	23.0769
NVE17329	78	NVE226	410	23.0769
NVE3755	78	NVEC200_000296_1.1	419	23.0769
NVE8232	104	NVE3868	74	22.973
NVE4601	238	NVE24308	57	22.807
NVE15340	1820	NVE24308	57	22.807
NVEC200_009244_1.1	621	NVE9956|HADO01002733.1	79	22.7848
NVE2302	66	NVE5454	72	22.7273
HADP01262889.1	71	NVE15340	1820	22.5352
HADP01262889.1	71	NVE24290	5017	22.5352
NVEC200_004869_1.1|Nvec_PRGamide	544	NVE3865	71	22.5352
NVE226	410	NVE3865	71	22.5352
HADP01211238.1	71	NVE15677	137	22.5352
NVE24290	5017	Nvec_comp12848_Phoenixin	67	22.3881
NVEC200_003938_1.1	1775	Nvec_RPamide_EDO37503.p1	85	22.3529
NVEC200_004869_1.1|Nvec_PRGamide	544	NVE5454	72	22.2222
NVE226	410	NVE5454	72	22.2222
NVE4853	540	NVE15078	68	22.0588
NVEC200_009244_1.1	621	NVE5400	41	21.9512
NVEC200_002782_1.1	226	NVE5400	41	21.9512
NVEC200_005480_1.1	2251	NVE5400	41	21.9512
NVEC200_000005_1.1	1018	NVE5400	41	21.9512
NVE22972	977	NVE5400	41	21.9512
NVE21167	263	NVE5400	41	21.9512
NVEC200_004847_1.1	240	NVE5400	41	21.9512
NVE9107	767	NVE5400	41	21.9512
NVE5400	41	NVE18016	113	21.9512
NVE5400	41	NVE4853	540	21.9512
NVE5400	41	NVE22000	73	21.9512
NVE5400	41	NVEC200_008652_1.1	757	21.9512
NVE5400	41	NVEC200_012385_1.1	434	21.9512
NVE5400	41	NVEC200_000296_1.1	419	21.9512
NVEC200_004869_1.1|Nvec_PRGamide	544	NVE22351	73	21.9178
NVEC200_013206_1.1	240	NVE22000	73	21.9178
NVE15069	213	NVE22000	73	21.9178
Nvec_HIRamide	240	NVE22000	73	21.9178
NVE11178|HADP01056499.1	64	NVE22972	977	21.875
NVE11178|HADP01056499.1	64	NVEC200_005266_1.1	1464	21.875
NVE11178|HADP01056499.1	64	NVE13213	186	21.875
NVE11178|HADP01056499.1	64	NVEC200_005515_1.1	175	21.875
NVE11178|HADP01056499.1	64	NVE21426	182	21.875
NVE19548	87	NVE21167	263	21.8391
Nvec_GLWamide	347	NVE3755	78	21.7949
NVE17329	78	NVEC200_004869_1.1|Nvec_PRGamide	544	21.7949
NVE17329	78	NVEC200_000296_1.1	419	21.7949
NVE16146	581	NVE3755	78	21.7949
NVE1473	202	NVE3755	78	21.7949
NVE15340	1820	NVE3755	78	21.7949
NVE3755	78	NVE24290	5017	21.7949
NVE3755	78	NVEC200_008652_1.1	757	21.7949
NVE11072	218	NVE21970	46	21.7391
NVE17328|HADO01000428.1	69	HADP01211238.1	71	21.7391
NVE19082	767	NVE21970	46	21.7391
NVE24307|HADP01080760.1	69	NVE15529	211	21.7391
NVE24307|HADP01080760.1	69	NVE21426	182	21.7391
NVE24307|HADP01080760.1	69	NVE24290	5017	21.7391
NVE24307|HADP01080760.1	69	NVEC200_012385_1.1	434	21.7391
NVE21970	46	NVEC200_000005_1.1	1018	21.7391
NVE21970	46	NVE23858	679	21.7391
NVE21970	46	NVEC200_003938_1.1	1775	21.7391
NVE21970	46	NVEC200_005266_1.1	1464	21.7391
NVE21970	46	NVE24290	5017	21.7391
NVE21970	46	NVEC200_000672_1.1	838	21.7391
NVEC200_005480_1.1	2251	NVE24610	60	21.6667
NVEC200_003938_1.1	1775	NVE21004	60	21.6667
NVE15340	1820	NVE21004	60	21.6667
NVEC200_004847_1.1	240	NVE24610	60	21.6667
NVE15666	234	NVE24610	60	21.6667
NVE24610	60	NVE3482	378	21.6667
NVE18646	76	NVE3868	74	21.6216
NVE3868	74	NVE4853	540	21.6216
NVEC200_004869_1.1|Nvec_PRGamide	544	NVE9956|HADO01002733.1	79	21.519
NVE226	410	NVE9956|HADO01002733.1	79	21.519
NVE9956|HADO01002733.1	79	NVE26068	123	21.519
NVE12742	70	NVE2974	221	21.4286
NVEC200_005480_1.1	2251	NVE20161	75	21.3333
NVE5882	1075	NVE9896	33	21.2121
NVEC200_014617_1.1	524	NVE9896	33	21.2121
NVEC200_009244_1.1	621	NVE9896	33	21.2121
NVE2302	66	NVE17328|HADO01000428.1	69	21.2121
NVE2302	66	NVEC200_000005_1.1	1018	21.2121
NVE2302	66	NVE24290	5017	21.2121
NVE8376	78	NVE9896	33	21.2121
NVE8927	178	NVE9896	33	21.2121
NVE16146	581	NVE9896	33	21.2121
NVE24305|HADP01189706.1	66	NVEC200_014051_1.1	592	21.2121
NVE24305|HADP01189706.1	66	NVE21167	263	21.2121
NVE24305|HADP01189706.1	66	NVE7509	563	21.2121
NVE24305|HADP01189706.1	66	NVEC200_004626_1.1	130	21.2121
NVE11386	92	NVE9896	33	21.2121
NVEC200_000005_1.1	1018	NVE9896	33	21.2121
NVE15340	1820	NVE9896	33	21.2121
NVE1038	138	NVE9896	33	21.2121
NVEC200_012480_1.1	391	NVE9896	33	21.2121
NVEC200_004815_1.1	248	NVE9896	33	21.2121
NVE21750	248	NVE9896	33	21.2121
NVE13213	186	NVE9896	33	21.2121
NVEC200_006106_1.1	615	NVE9896	33	21.2121
NVE897	234	NVE9896	33	21.2121
NVE9896	33	NVEC200_004847_1.1	240	21.2121
NVE9896	33	NVE18847	490	21.2121
NVE9896	33	NVE13685	76	21.2121
NVE9896	33	NVEC200_014828_1.1	233	21.2121
NVE9896	33	NVE24230	172	21.2121
NVE9896	33	NVEC200_014058_1.1	178	21.2121
NVE9896	33	NVE18016	113	21.2121
NVE9896	33	NVE4853	540	21.2121
NVE9896	33	NVE7520	176	21.2121
NVE9896	33	NVE24610	60	21.2121
NVE9896	33	NVE3482	378	21.2121
NVE9896	33	NVE15505	345	21.2121
NVE9896	33	NVEC200_008652_1.1	757	21.2121
NVE9896	33	NVEC200_013996_1.1	313	21.2121
NVE9896	33	NVEC200_004626_1.1	130	21.2121
HADP01262889.1	71	NVEC200_000005_1.1	1018	21.1268
HADP01262889.1	71	NVE5454	72	21.1268
HADP01262889.1	71	NVEC200_012385_1.1	434	21.1268
NVEC200_004869_1.1|Nvec_PRGamide	544	HADP01211238.1	71	21.1268
NVE3865	71	NVEC200_012385_1.1	434	21.1268
NVE5882	1075	NVE10634	76	21.0526
NVE21713	237	NVE13685	76	21.0526
NVE6207	76	NVE24308	57	21.0526
NVE17329	78	NVE18646	76	21.0526
NVE11178|HADP01056499.1	64	NVE24308	57	21.0526
NVEC200_003938_1.1	1775	NVE24308	57	21.0526
NVEC200_012480_1.1	391	NVE13685	76	21.0526
NVE24290	5017	NVE10634	76	21.0526
NVEC200_009895_1.1	294	NVE24308	57	21.0526
NVE13685	76	NVE9107	767	21.0526
NVE15666	234	NVEC200_012385_1.1	434	20.9402
NVE5454	72	NVEC200_006106_1.1	615	20.8333
NVE5454	72	NVE6394	377	20.8333
NVEC200_004869_1.1|Nvec_PRGamide	544	NVE12918|HADO01001257.1	77	20.7792
NVE226	410	NVE12918|HADO01001257.1	77	20.7792
NVE12918|HADO01001257.1	77	NVEC200_013996_1.1	313	20.7792
NVE12327	82	NVE24290	5017	20.7317
NVE16146	581	NVE15078	68	20.5882
NVE15078	68	NVE15666	234	20.5882
NVE1820	270	NVE22351	73	20.5479
NVE226	410	NVE22351	73	20.5479
NVEC200_003938_1.1	1775	NVE22000	73	20.5479
NVE24290	5017	NVE22351	73	20.5479
NVEC200_005559_1.1	173	NVE22000	73	20.5479
NVEC200_004380_1.1	201	NVE22351	73	20.5479
NVEC200_014078_1.1	412	NVE17329	78	20.5128
NVE17329	78	NVEC200_002800_1.1|Nvec_VRHamide	121	20.5128
NVE17329	78	NVE9956|HADO01002733.1	79	20.5128
NVE3755	78	NVE5329	138	20.5128
NVEC200_004869_1.1|Nvec_PRGamide	544	NVE2880	103	20.3883
Nvec_GLWamide	347	NVE11178|HADP01056499.1	64	20.3125
NVEC200_005480_1.1	2251	NVE11178|HADP01056499.1	64	20.3125
NVE11178|HADP01056499.1	64	NVEC200_000005_1.1	1018	20.3125
NVE11178|HADP01056499.1	64	NVEC200_002800_1.1|Nvec_VRHamide	121	20.3125
NVE11178|HADP01056499.1	64	NVE12742	70	20.3125
NVE11178|HADP01056499.1	64	NVE3755	78	20.3125
NVE11178|HADP01056499.1	64	NVE16210	117	20.3125
NVE11178|HADP01056499.1	64	NVE5329	138	20.3125
NVE11178|HADP01056499.1	64	NVE24290	5017	20.3125
NVE11178|HADP01056499.1	64	NVE9956|HADO01002733.1	79	20.3125
NVE11178|HADP01056499.1	64	NVE15666	234	20.3125
NVE11178|HADP01056499.1	64	NVE4012|Nvec_XP_032233649.1	269	20.3125
NVE11178|HADP01056499.1	64	NVEC200_012385_1.1	434	20.3125
NVE11178|HADP01056499.1	64	NVEC200_000296_1.1	419	20.3125
Nvec_GLWamide	347	NVE17328|HADO01000428.1	69	20.2899
NVE11072	218	NVE17328|HADO01000428.1	69	20.2899
HADP01262889.1	71	NVE17328|HADO01000428.1	69	20.2899
NVE17328|HADO01000428.1	69	NVE9233	114	20.2899
NVE17328|HADO01000428.1	69	NVE18122	300	20.2899
NVE17328|HADO01000428.1	69	NVEC200_000296_1.1	419	20.2899
NVE1473	202	NVE24307|HADP01080760.1	69	20.2899
NVE24307|HADP01080760.1	69	NVE3755	78	20.2899
NVE24307|HADP01080760.1	69	NVEC200_005515_1.1	175	20.2899
NVE24307|HADP01080760.1	69	NVE339	219	20.2899
NVE5329	138	NVE15666	234	20.2899
NVEC200_005480_1.1	2251	NVE3868	74	20.2703
NVE9233	114	NVE3868	74	20.2703
NVE15529	211	NVE3868	74	20.2703
NVE24290	5017	NVE3868	74	20.2703
NVE1820	270	NVE9956|HADO01002733.1	79	20.2532
NVE2870	376	NVE9956|HADO01002733.1	79	20.2532
Nvec_GLWamide	347	NVE9956|HADO01002733.1	79	20.2532
NVEC200_013180_1.1	375	NVE9956|HADO01002733.1	79	20.2532
NVE1473	202	NVE9956|HADO01002733.1	79	20.2532
NVEC200_014051_1.1	592	NVE9956|HADO01002733.1	79	20.2532
NVE7509	563	NVE9956|HADO01002733.1	79	20.2532
NVE4853	540	NVE9956|HADO01002733.1	79	20.2532
NVE9956|HADO01002733.1	79	NVEC200_000296_1.1	419	20.2532
NVE9233	114	NVE24290	5017	20.1754
NVE5882	1075	NVE24610	60	20
NVEC200_014617_1.1	524	NVE20161	75	20
NVEC200_014617_1.1	524	NVE21004	60	20
NVEC200_009244_1.1	621	NVE20161	75	20
NVEC200_009244_1.1	621	NVE24610	60	20
NVEC200_005480_1.1	2251	Nvec_RPamide_EDO37503.p1	85	20
NVEC200_005480_1.1	2251	NVE21004	60	20
NVE226	410	NVE21004	60	20
NVE16146	581	Nvec_RPamide_EDO37503.p1	85	20
NVEC200_012734_1.1	133	NVE21004	60	20
NVE20161	75	NVE24290	5017	20
NVE20161	75	NVE18847	490	20
NVE20161	75	NVE3482	378	20
NVE12742	70	NVE22972	977	20
NVE12742	70	NVE897	234	20
NVE12742	70	NVEC200_004847_1.1	240	20
NVE12742	70	NVE2973	253	20
NVE12742	70	NVEC200_005035_1.1	301	20
NVE15340	1820	Nvec_RPamide_EDO37503.p1	85	20
Nvec_RPamide_EDO37503.p1	85	NVEC200_008652_1.1	757	20
NVE22972	977	NVE21004	60	20
NVEC200_005266_1.1	1464	NVE24610	60	20
NVEC200_005266_1.1	1464	NVE21004	60	20
NVEC200_006106_1.1	615	NVE24610	60	20
NVE339	219	NVE24610	60	20
NVEC200_013206_1.1	240	NVE24610	60	20
NVE15069	213	NVE24610	60	20
Nvec_HIRamide	240	NVE24610	60	20
NVE18847	490	NVE21004	60	20
NVE9107	767	NVE24610	60	20
NVEC200_004380_1.1	201	NVE21004	60	20
NVE4853	540	NVE24610	60	20
NVE24610	60	NVEC200_012385_1.1	434	20
NVE21004	60	NVE6394	377	20
NVE226	410	NVE24230	172	19.7674
NVE4782	86	NVE21167	263	19.7674
NVE4782	86	NVEC200_010517_1.1	282	19.7674
NVEC200_014617_1.1	524	NVE18646	76	19.7368
NVEC200_009244_1.1	621	NVE13685	76	19.7368
NVE23327	238	NVE13685	76	19.7368
NVE21713	237	NVE6207	76	19.7368
NVE6207	76	NVE21426	182	19.7368
NVE6207	76	NVEC200_013206_1.1	240	19.7368
NVE6207	76	Nvec_HIRamide	240	19.7368
NVE6207	76	NVE3482	378	19.7368
NVE6207	76	NVEC200_012385_1.1	434	19.7368
NVEC200_000005_1.1	1018	NVE13685	76	19.7368
NVE18646	76	NVEC200_004815_1.1	248	19.7368
NVE18646	76	NVE18847	490	19.7368
NVE18646	76	NVE9107	767	19.7368
NVEC200_014051_1.1	592	NVE13685	76	19.7368
NVE7509	563	NVE13685	76	19.7368
NVE13685	76	NVEC200_014828_1.1	233	19.7368
NVE13685	76	NVE4012|Nvec_XP_032233649.1	269	19.7368
NVE10634	76	NVE4012|Nvec_XP_032233649.1	269	19.7368
NVE5882	1075	NVE3865	71	19.7183
Nvec_GLWamide	347	HADP01211238.1	71	19.7183
NVE11072	218	HADP01211238.1	71	19.7183
NVEC200_014078_1.1	412	HADP01262889.1	71	19.7183
NVE7549|Nvec_RFamide	396	HADP01262889.1	71	19.7183
HADP01262889.1	71	NVE6207	76	19.7183
HADP01262889.1	71	NVE8232	104	19.7183
HADP01262889.1	71	Nvec_QWamide	325	19.7183
NVE17329	78	HADP01211238.1	71	19.7183
NVE226	410	HADP01211238.1	71	19.7183
NVEC200_013180_1.1	375	HADP01211238.1	71	19.7183
NVE19082	767	HADP01211238.1	71	19.7183
NVE7357	206	HADP01211238.1	71	19.7183
NVE1038	138	HADP01211238.1	71	19.7183
HADP01211238.1	71	NVEC200_012480_1.1	391	19.7183
HADP01211238.1	71	NVE9858	296	19.7183
HADP01211238.1	71	NVE24290	5017	19.7183
HADP01211238.1	71	NVE339	219	19.7183
HADP01211238.1	71	NVE6636	158	19.7183
HADP01211238.1	71	NVE15666	234	19.7183
HADP01211238.1	71	NVE3482	378	19.7183
HADP01211238.1	71	NVE24582	471	19.7183
HADP01211238.1	71	NVEC200_008652_1.1	757	19.7183
HADP01211238.1	71	NVEC200_004699_1.1	669	19.7183
HADP01211238.1	71	NVEC200_000296_1.1	419	19.7183
HADP01211238.1	71	NVEC200_010517_1.1	282	19.7183
HADP01211238.1	71	NVEC200_000672_1.1	838	19.7183
NVE3865	71	NVE21167	263	19.7183
NVE3865	71	NVE6636	158	19.7183
NVE3865	71	NVEC200_010517_1.1	282	19.7183
NVE5882	1075	NVE24305|HADP01189706.1	66	19.697
NVE11072	218	NVE2302	66	19.697
NVE2302	66	NVE24305|HADP01189706.1	66	19.697
NVE2302	66	NVEC200_003938_1.1	1775	19.697
NVE2302	66	NVE8232	104	19.697
NVE2302	66	NVE15529	211	19.697
NVE2302	66	NVE21426	182	19.697
NVE2302	66	NVEC200_012385_1.1	434	19.697
NVE2302	66	NVEC200_000296_1.1	419	19.697
NVE2302	66	NVEC200_000672_1.1	838	19.697
HADP01262889.1	71	NVE24305|HADP01189706.1	66	19.697
NVE17329	78	NVE24305|HADP01189706.1	66	19.697
NVE24305|HADP01189706.1	66	NVE1473	202	19.697
NVE24305|HADP01189706.1	66	NVE23858	679	19.697
NVE24305|HADP01189706.1	66	NVE26068	123	19.697
NVEC200_002806_1.1	112	NVEC200_005480_1.1	2251	19.6429
NVEC200_002806_1.1	112	NVE1473	202	19.6429
NVEC200_002782_1.1	226	NVE21970	46	19.5652
NVEC200_005480_1.1	2251	NVE21970	46	19.5652
NVE21970	46	NVE8677	136	19.5652
NVE21970	46	NVE15340	1820	19.5652
NVE21970	46	NVEC200_014051_1.1	592	19.5652
NVE21970	46	NVE7509	563	19.5652
NVE21970	46	NVE24230	172	19.5652
NVE21970	46	NVE3482	378	19.5652
NVE21970	46	NVE16920	159	19.5652
NVE21970	46	NVE15505	345	19.5652
NVE21970	46	NVEC200_008652_1.1	757	19.5652
NVE21970	46	NVEC200_013996_1.1	313	19.5652
NVE21167	263	NVE5329	138	19.5652
NVE19548	87	NVEC200_000005_1.1	1018	19.5402
NVEC200_002806_1.1	112	NVE5400	41	19.5122
NVE5882	1075	NVE5400	41	19.5122
NVEC200_014617_1.1	524	NVE5400	41	19.5122
Nvec_GLWamide	347	NVE5400	41	19.5122
NVE23327	238	NVE12327	82	19.5122
NVE21713	237	NVE12327	82	19.5122
NVE4068	107	NVE12327	82	19.5122
NVE1473	202	NVE5400	41	19.5122
NVE23858	679	NVE5400	41	19.5122
NVEC200_003938_1.1	1775	NVE5400	41	19.5122
NVE15340	1820	NVE5400	41	19.5122
NVEC200_012480_1.1	391	NVE5400	41	19.5122
NVEC200_005266_1.1	1464	NVE26068	123	19.5122
NVE21750	248	NVE5400	41	19.5122
NVE13213	186	NVE5400	41	19.5122
NVEC200_005515_1.1	175	NVE5400	41	19.5122
NVE897	234	NVE5400	41	19.5122
NVE339	219	NVE5400	41	19.5122
NVE18847	490	NVE5400	41	19.5122
NVEC200_014828_1.1	233	NVE5400	41	19.5122
NVE5400	41	NVE7771	130	19.5122
NVE5400	41	NVE24857	103	19.5122
NVE5400	41	NVE3482	378	19.5122
NVE5400	41	NVE15505	345	19.5122
NVE5400	41	NVEC200_004699_1.1	669	19.5122
NVE5400	41	NVEC200_004626_1.1	130	19.5122
NVE5882	1075	NVE12918|HADO01001257.1	77	19.4805
NVEC200_003938_1.1	1775	NVE12918|HADO01001257.1	77	19.4805
NVE15340	1820	NVE12918|HADO01001257.1	77	19.4805
NVE12918|HADO01001257.1	77	NVE9956|HADO01002733.1	79	19.4805
NVE2870	376	NVE5454	72	19.4444
NVEC200_009244_1.1	621	NVE5454	72	19.4444
NVEC200_012735_1.1	376	NVE5454	72	19.4444
NVEC200_013180_1.1	375	NVE5454	72	19.4444
NVE5454	72	NVEC200_003938_1.1	1775	19.4444
NVE5454	72	NVE9107	767	19.4444
NVE5454	72	NVEC200_013996_1.1	313	19.4444
NVEC200_005266_1.1	1464	NVE2880	103	19.4175
NVEC200_005266_1.1	1464	NVE2470	103	19.4175
NVEC200_009244_1.1	621	Nvec_comp12848_Phoenixin	67	19.403
NVEC200_009244_1.1	621	NVE24308	57	19.2982
NVE16146	581	NVE24308	57	19.2982
NVE24307|HADP01080760.1	69	NVE24308	57	19.2982
NVEC200_000005_1.1	1018	NVE24308	57	19.2982
NVE5454	72	NVE24308	57	19.2982
HADP01211238.1	71	NVE24308	57	19.2982
NVE22972	977	NVE24308	57	19.2982
NVEC200_005266_1.1	1464	NVE24308	57	19.2982
NVE13213	186	NVE24308	57	19.2982
NVEC200_005515_1.1	175	NVE24308	57	19.2982
NVE21426	182	NVE24308	57	19.2982
NVE18847	490	NVE24308	57	19.2982
NVE24308	57	NVEC200_008652_1.1	757	19.2982
NVEC200_005480_1.1	2251	NVE3755	78	19.2308
NVE8376	78	NVEC200_008914_1.1	382	19.2308
NVE8376	78	NVE24290	5017	19.2308
NVE8376	78	NVEC200_008652_1.1	757	19.2308
NVE17329	78	NVE8927	178	19.2308
NVE17329	78	NVE23858	679	19.2308
NVE17329	78	NVE9233	114	19.2308
NVE17329	78	NVEC200_012480_1.1	391	19.2308
NVE17329	78	NVEC200_013996_1.1	313	19.2308
NVEC200_004869_1.1|Nvec_PRGamide	544	NVE8232	104	19.2308
NVE226	410	NVE8232	104	19.2308
NVE19082	767	NVE3755	78	19.2308
NVEC200_003938_1.1	1775	NVE3755	78	19.2308
NVE3755	78	NVE21426	182	19.2308
NVE3755	78	NVEC200_000672_1.1	838	19.2308
NVE2870	376	NVE22351	73	19.1781
NVEC200_005480_1.1	2251	NVE22351	73	19.1781
NVEC200_013180_1.1	375	NVE22351	73	19.1781
NVE19082	767	NVE22000	73	19.1781
NVE23858	679	NVE22351	73	19.1781
NVE23858	679	NVE22000	73	19.1781
NVEC200_003938_1.1	1775	NVE22351	73	19.1781
NVE15340	1820	NVE22000	73	19.1781
NVE8232	104	NVE22351	73	19.1781
NVE22972	977	NVE22351	73	19.1781
NVEC200_005266_1.1	1464	NVE22351	73	19.1781
NVE9107	767	NVE22351	73	19.1781
NVE22351	73	NVE15505	345	19.1781
NVE22351	73	NVEC200_013996_1.1	313	19.1781
NVE22000	73	NVEC200_008652_1.1	757	19.1781
NVE22000	73	NVEC200_000672_1.1	838	19.1781
NVE11072	218	NVE15078	68	19.1176
NVE24290	5017	NVE15078	68	19.1176
NVE15078	68	NVE24582	471	19.1176
NVE15078	68	NVEC200_013996_1.1	313	19.1176
NVEC200_012735_1.1	376	NVE9956|HADO01002733.1	79	18.9873
NVE15340	1820	NVE9956|HADO01002733.1	79	18.9873
NVE9956|HADO01002733.1	79	NVE6394	377	18.9873
NVE11271	155	NVE3868	74	18.9189
NVEC200_004869_1.1|Nvec_PRGamide	544	NVE3868	74	18.9189
NVE19082	767	NVE3868	74	18.9189
NVEC200_005266_1.1	1464	NVE3868	74	18.9189
NVE21167	263	NVE3868	74	18.9189
NVE13213	186	NVE3868	74	18.9189
NVEC200_005515_1.1	175	NVE3868	74	18.9189
NVE3868	74	NVE6636	158	18.9189
NVE3868	74	NVE26068	123	18.9189
NVE3868	74	NVE3482	378	18.9189
NVE3868	74	NVE24582	471	18.9189
NVE3868	74	NVEC200_004699_1.1	669	18.9189
NVE3868	74	NVEC200_000296_1.1	419	18.9189
NVE3868	74	NVEC200_010517_1.1	282	18.9189
NVE3868	74	NVEC200_000672_1.1	838	18.9189
NVEC200_014078_1.1	412	NVE16920	159	18.8679
NVE7549|Nvec_RFamide	396	NVE16920	159	18.8679
NVEC200_009895_1.1	294	NVE16920	159	18.8679
NVE5882	1075	NVE24307|HADP01080760.1	69	18.8406
NVE11072	218	NVE24307|HADP01080760.1	69	18.8406
NVE11271	155	NVE24307|HADP01080760.1	69	18.8406
NVEC200_005480_1.1	2251	NVE24307|HADP01080760.1	69	18.8406
NVE17328|HADO01000428.1	69	NVE6207	76	18.8406
NVE17328|HADO01000428.1	69	NVEC200_000005_1.1	1018	18.8406
NVE17328|HADO01000428.1	69	NVE15340	1820	18.8406
NVE17328|HADO01000428.1	69	NVE18646	76	18.8406
NVE17328|HADO01000428.1	69	NVEC200_012480_1.1	391	18.8406
NVE17328|HADO01000428.1	69	NVE22972	977	18.8406
NVE17328|HADO01000428.1	69	NVEC200_004847_1.1	240	18.8406
NVE17328|HADO01000428.1	69	NVE18847	490	18.8406
NVE17328|HADO01000428.1	69	NVEC200_014058_1.1	178	18.8406
NVE17328|HADO01000428.1	69	NVE7520	176	18.8406
NVE24307|HADP01080760.1	69	NVE7965	380	18.8406
NVE24307|HADP01080760.1	69	NVEC200_003938_1.1	1775	18.8406
NVE24307|HADP01080760.1	69	NVE15340	1820	18.8406
NVE24307|HADP01080760.1	69	NVE3865	71	18.8406
NVE24307|HADP01080760.1	69	NVE13213	186	18.8406
NVE24307|HADP01080760.1	69	NVE5329	138	18.8406
NVE24307|HADP01080760.1	69	NVE4853	540	18.8406
NVE24307|HADP01080760.1	69	NVE2973	253	18.8406
NVE24307|HADP01080760.1	69	NVE9956|HADO01002733.1	79	18.8406
NVE24307|HADP01080760.1	69	NVE3482	378	18.8406
NVE24307|HADP01080760.1	69	NVEC200_008652_1.1	757	18.8406
NVE24307|HADP01080760.1	69	NVEC200_005035_1.1	301	18.8406
NVEC200_000005_1.1	1018	Nvec_RPamide_EDO37503.p1	85	18.8235
NVE1038	138	Nvec_RPamide_EDO37503.p1	85	18.8235
Nvec_RPamide_EDO37503.p1	85	NVEC200_006106_1.1	615	18.8235
Nvec_RPamide_EDO37503.p1	85	NVE24290	5017	18.8235
Nvec_RPamide_EDO37503.p1	85	NVE15666	234	18.8235
Nvec_RPamide_EDO37503.p1	85	NVE4012|Nvec_XP_032233649.1	269	18.8235
NVE19082	767	NVE16210	117	18.8034
NVEC200_002806_1.1	112	NVE11178|HADP01056499.1	64	18.75
NVE11271	155	NVE11178|HADP01056499.1	64	18.75
NVE17329	78	NVE11178|HADP01056499.1	64	18.75
NVE11178|HADP01056499.1	64	HADP01211238.1	71	18.75
NVE11178|HADP01056499.1	64	NVE18646	76	18.75
NVE11178|HADP01056499.1	64	NVE9858	296	18.75
NVE11178|HADP01056499.1	64	NVE12918|HADO01001257.1	77	18.75
NVE11178|HADP01056499.1	64	NVE339	219	18.75
NVE11178|HADP01056499.1	64	NVE15069	213	18.75
NVE11178|HADP01056499.1	64	NVE18847	490	18.75
NVE11178|HADP01056499.1	64	NVEC200_014828_1.1	233	18.75
NVE11178|HADP01056499.1	64	NVE2973	253	18.75
NVE11178|HADP01056499.1	64	NVE6636	158	18.75
NVE11178|HADP01056499.1	64	NVE16920	159	18.75
NVE11178|HADP01056499.1	64	NVE15505	345	18.75
NVE11178|HADP01056499.1	64	NVEC200_004699_1.1	669	18.75
NVE11178|HADP01056499.1	64	NVEC200_010517_1.1	282	18.75
NVE11178|HADP01056499.1	64	NVEC200_004626_1.1	130	18.75
Nvec_GLWamide	347	NVE226	410	18.732
NVE4068	107	NVEC200_013996_1.1	313	18.6916
Nvec_GLWamide	347	NVE20161	75	18.6667
NVEC200_004869_1.1|Nvec_PRGamide	544	NVE20161	75	18.6667
NVE226	410	NVE20161	75	18.6667
NVE20161	75	NVE9107	767	18.6667
NVE20161	75	NVEC200_000672_1.1	838	18.6667
NVEC200_004869_1.1|Nvec_PRGamide	544	NVE24230	172	18.6047
NVE8232	104	NVE4782	86	18.6047
NVE4782	86	NVE15529	211	18.6047
NVE4782	86	NVE6636	158	18.6047
NVE4782	86	NVE4012|Nvec_XP_032233649.1	269	18.6047
Nvec_GLWamide	347	NVE2973	253	18.5771
NVE2973	253	NVEC200_000296_1.1	419	18.5771
NVEC200_009244_1.1	621	NVE12742	70	18.5714
Nvec_GLWamide	347	NVE12742	70	18.5714
NVE11271	155	NVE12742	70	18.5714
NVE17329	78	NVE12742	70	18.5714
NVE16146	581	NVE12742	70	18.5714
NVE12742	70	NVEC200_003938_1.1	1775	18.5714
NVE12742	70	NVE8232	104	18.5714
NVE12742	70	NVEC200_014051_1.1	592	18.5714
NVE12742	70	NVEC200_005266_1.1	1464	18.5714
NVE12742	70	NVEC200_004815_1.1	248	18.5714
NVE12742	70	NVE21750	248	18.5714
NVE12742	70	NVE7509	563	18.5714
NVE12742	70	NVE21426	182	18.5714
NVE12742	70	NVE5329	138	18.5714
NVE12742	70	NVE24290	5017	18.5714
NVE12742	70	NVE339	219	18.5714
NVE12742	70	NVEC200_014828_1.1	233	18.5714
NVE12742	70	NVEC200_000296_1.1	419	18.5714
NVE11386	92	NVEC200_006106_1.1	615	18.4783
NVE11386	92	NVE24582	471	18.4783
NVE9233	114	NVE24721	92	18.4783
NVE18847	490	NVE24721	92	18.4783
NVE5882	1075	NVE7771	130	18.4615
NVEC200_004869_1.1|Nvec_PRGamide	544	NVE2470	103	18.4466
NVEC200_004869_1.1|Nvec_PRGamide	544	NVE24857	103	18.4466
NVE226	410	NVE2880	103	18.4466
NVE226	410	NVE24857	103	18.4466
NVEC200_005266_1.1	1464	NVE24857	103	18.4466
NVEC200_002806_1.1	112	NVE10634	76	18.4211
NVE5882	1075	NVE18646	76	18.4211
NVEC200_014617_1.1	524	NVE13685	76	18.4211
NVEC200_009244_1.1	621	NVE10634	76	18.4211
Nvec_GLWamide	347	NVE10634	76	18.4211
NVE23327	238	NVE6207	76	18.4211
NVE21713	237	NVE10634	76	18.4211
NVEC200_005480_1.1	2251	NVE6207	76	18.4211
NVEC200_005480_1.1	2251	NVE13685	76	18.4211
NVE6207	76	NVE8927	178	18.4211
NVE6207	76	NVEC200_004869_1.1|Nvec_PRGamide	544	18.4211
NVE6207	76	NVE12327	82	18.4211
NVE6207	76	NVEC200_008914_1.1	382	18.4211
NVE6207	76	NVEC200_005266_1.1	1464	18.4211
NVE6207	76	NVEC200_006106_1.1	615	18.4211
NVE6207	76	NVE9107	767	18.4211
NVE6207	76	NVEC200_004380_1.1	201	18.4211
NVE17329	78	NVE13685	76	18.4211
NVEC200_004869_1.1|Nvec_PRGamide	544	NVE18646	76	18.4211
NVE8677	136	NVE13685	76	18.4211
NVE7965	380	NVE18646	76	18.4211
NVE23858	679	NVE18646	76	18.4211
NVE15340	1820	NVE13685	76	18.4211
NVE18646	76	NVE21750	248	18.4211
NVE18646	76	NVEC200_006106_1.1	615	18.4211
NVE18646	76	NVEC200_005559_1.1	173	18.4211
NVE18646	76	NVEC200_012385_1.1	434	18.4211
NVE18646	76	NVEC200_013996_1.1	313	18.4211
NVEC200_012480_1.1	391	NVE10634	76	18.4211
NVE22972	977	NVE13685	76	18.4211
NVEC200_005266_1.1	1464	NVE13685	76	18.4211
NVEC200_005266_1.1	1464	NVE10634	76	18.4211
NVEC200_006106_1.1	615	NVE10634	76	18.4211
NVE339	219	NVE13685	76	18.4211
NVEC200_005559_1.1	173	NVE10634	76	18.4211
NVE18847	490	NVE13685	76	18.4211
NVE13685	76	NVE24230	172	18.4211
NVE13685	76	NVE4853	540	18.4211
NVE13685	76	NVEC200_008652_1.1	757	18.4211
NVE13685	76	NVEC200_000296_1.1	419	18.4211
NVE10634	76	NVE6394	377	18.4211
NVE10634	76	NVEC200_008652_1.1	757	18.4211
NVE10634	76	NVEC200_000296_1.1	419	18.4211
NVE19548	87	NVE24290	5017	18.3908
NVE19548	87	NVE897	234	18.3908
NVE19548	87	NVEC200_014828_1.1	233	18.3908
NVE19548	87	NVEC200_008652_1.1	757	18.3908
NVE19548	87	NVEC200_004699_1.1	669	18.3908
NVE19548	87	NVEC200_004626_1.1	130	18.3908
NVE8677	136	NVEC200_005266_1.1	1464	18.3824
NVE1820	270	NVE21004	60	18.3333
NVE2870	376	NVE21004	60	18.3333
NVEC200_002782_1.1	226	NVE24610	60	18.3333
NVEC200_004869_1.1|Nvec_PRGamide	544	NVE21004	60	18.3333
NVE16146	581	NVE21004	60	18.3333
NVE20305	176	NVE21004	60	18.3333
NVEC200_012735_1.1	376	NVE21004	60	18.3333
NVE20303	197	NVE21004	60	18.3333
NVEC200_013180_1.1	375	NVE21004	60	18.3333
NVE19082	767	NVE24610	60	18.3333
NVE19082	767	NVE21004	60	18.3333
NVEC200_000005_1.1	1018	NVE21004	60	18.3333
NVE7357	206	NVE21004	60	18.3333
NVE3755	78	NVE24610	60	18.3333
NVEC200_014051_1.1	592	NVE24610	60	18.3333
NVEC200_014051_1.1	592	NVE21004	60	18.3333
NVE7509	563	NVE21004	60	18.3333
NVEC200_006106_1.1	615	NVE21004	60	18.3333
NVE24290	5017	NVE24610	60	18.3333
NVE24290	5017	NVE21004	60	18.3333
NVEC200_004380_1.1	201	NVE24610	60	18.3333
NVE6636	158	NVE21004	60	18.3333
NVE24610	60	NVEC200_008652_1.1	757	18.3333
NVE24610	60	NVEC200_004699_1.1	669	18.3333
NVE24610	60	NVEC200_004626_1.1	130	18.3333
NVE3482	378	NVE21004	60	18.3333
NVE10634	76	NVE21004	60	18.3333
NVE21004	60	NVEC200_008652_1.1	757	18.3333
NVE21004	60	NVEC200_004699_1.1	669	18.3333
NVE21004	60	NVEC200_010517_1.1	282	18.3333
NVE21004	60	NVEC200_000672_1.1	838	18.3333
NVE21004	60	NVEC200_005035_1.1	301	18.3333
NVEC200_002806_1.1	112	HADP01211238.1	71	18.3099
NVE1820	270	NVE3865	71	18.3099
NVE2870	376	NVE3865	71	18.3099
NVEC200_009244_1.1	621	HADP01211238.1	71	18.3099
Nvec_GLWamide	347	NVE3865	71	18.3099
HADP01262889.1	71	NVEC200_005480_1.1	2251	18.3099
HADP01262889.1	71	NVE16146	581	18.3099
HADP01262889.1	71	NVE15529	211	18.3099
HADP01262889.1	71	NVE22972	977	18.3099
HADP01262889.1	71	NVEC200_005266_1.1	1464	18.3099
HADP01262889.1	71	NVE21426	182	18.3099
HADP01262889.1	71	NVEC200_006106_1.1	615	18.3099
HADP01262889.1	71	NVE6636	158	18.3099
HADP01262889.1	71	NVEC200_000296_1.1	419	18.3099
HADP01262889.1	71	NVEC200_010517_1.1	282	18.3099
NVEC200_005480_1.1	2251	HADP01211238.1	71	18.3099
NVEC200_005480_1.1	2251	NVE3865	71	18.3099
NVE16146	581	NVE3865	71	18.3099
NVE11386	92	HADP01211238.1	71	18.3099
NVEC200_012735_1.1	376	NVE3865	71	18.3099
NVEC200_013180_1.1	375	NVE3865	71	18.3099
NVE1473	202	NVE3865	71	18.3099
NVEC200_000005_1.1	1018	HADP01211238.1	71	18.3099
NVEC200_008914_1.1	382	NVE3865	71	18.3099
NVE23858	679	HADP01211238.1	71	18.3099
NVEC200_002800_1.1|Nvec_VRHamide	121	NVE3865	71	18.3099
NVE9233	114	NVE3865	71	18.3099
NVEC200_003938_1.1	1775	HADP01211238.1	71	18.3099
NVEC200_003938_1.1	1775	NVE3865	71	18.3099
NVE15340	1820	HADP01211238.1	71	18.3099
NVE8232	104	NVE3865	71	18.3099
NVE1038	138	NVE3865	71	18.3099
HADP01211238.1	71	NVE3865	71	18.3099
HADP01211238.1	71	NVE15529	211	18.3099
HADP01211238.1	71	NVE13213	186	18.3099
HADP01211238.1	71	NVEC200_005515_1.1	175	18.3099
HADP01211238.1	71	NVE12918|HADO01001257.1	77	18.3099
HADP01211238.1	71	NVEC200_013206_1.1	240	18.3099
HADP01211238.1	71	NVE15069	213	18.3099
HADP01211238.1	71	Nvec_HIRamide	240	18.3099
HADP01211238.1	71	NVEC200_014828_1.1	233	18.3099
HADP01211238.1	71	NVEC200_014058_1.1	178	18.3099
HADP01211238.1	71	NVE7520	176	18.3099
NVE3865	71	NVE3755	78	18.3099
NVE3865	71	NVEC200_014051_1.1	592	18.3099
NVE3865	71	NVE9858	296	18.3099
NVE3865	71	NVE7509	563	18.3099
NVE3865	71	NVE24290	5017	18.3099
NVE3865	71	NVEC200_005559_1.1	173	18.3099
NVE3865	71	NVE9107	767	18.3099
NVE3865	71	NVE4853	540	18.3099
NVE3865	71	NVE2973	253	18.3099
NVE3865	71	NVE26068	123	18.3099
NVE3865	71	NVE15666	234	18.3099
NVE3865	71	NVE3482	378	18.3099
NVE3865	71	NVE16920	159	18.3099
NVE3865	71	NVEC200_008652_1.1	757	18.3099
NVE3865	71	NVEC200_004699_1.1	669	18.3099
NVE3865	71	NVEC200_000296_1.1	419	18.3099
NVE3865	71	NVEC200_005035_1.1	301	18.3099
NVE5882	1075	NVE12327	82	18.2927
NVEC200_005480_1.1	2251	NVE12327	82	18.2927
NVE12327	82	NVE19082	767	18.2927
NVE12327	82	NVE7965	380	18.2927
NVE12327	82	NVEC200_000672_1.1	838	18.2927
NVEC200_005480_1.1	2251	NVE8232	104	18.2692
NVEC200_002806_1.1	112	NVE9896	33	18.1818
NVE1820	270	NVE12918|HADO01001257.1	77	18.1818
NVE1820	270	NVE9896	33	18.1818
NVE2870	376	NVE9896	33	18.1818
NVE22506	162	NVE9896	33	18.1818
NVEC200_014617_1.1	524	NVE2302	66	18.1818
NVE19548	87	NVE2302	66	18.1818
Nvec_GLWamide	347	NVEC200_002800_1.1|Nvec_VRHamide	121	18.1818
Nvec_GLWamide	347	NVE9896	33	18.1818
NVE23327	238	NVE2302	66	18.1818
NVE23327	238	NVE9896	33	18.1818
NVE21713	237	NVE9896	33	18.1818
NVE11072	218	NVE9896	33	18.1818
NVEC200_014078_1.1	412	NVE24305|HADP01189706.1	66	18.1818
NVEC200_014078_1.1	412	NVE9896	33	18.1818
NVE7549|Nvec_RFamide	396	NVE24305|HADP01189706.1	66	18.1818
NVE7549|Nvec_RFamide	396	NVE9896	33	18.1818
NVEC200_002782_1.1	226	NVE9896	33	18.1818
NVE2302	66	NVE6207	76	18.1818
NVE2302	66	NVE16146	581	18.1818
NVE2302	66	NVE19082	767	18.1818
NVE2302	66	NVE15340	1820	18.1818
NVE2302	66	NVEC200_012480_1.1	391	18.1818
NVE2302	66	NVE22972	977	18.1818
NVE2302	66	NVEC200_005266_1.1	1464	18.1818
NVE2302	66	NVE13213	186	18.1818
NVE2302	66	NVEC200_005515_1.1	175	18.1818
NVE2302	66	NVEC200_006106_1.1	615	18.1818
NVE2302	66	NVE18847	490	18.1818
NVE2302	66	NVE9107	767	18.1818
NVE2302	66	NVE4853	540	18.1818
NVE2302	66	NVE15666	234	18.1818
NVE2302	66	NVEC200_010517_1.1	282	18.1818
NVEC200_005480_1.1	2251	NVE24305|HADP01189706.1	66	18.1818
NVE17328|HADO01000428.1	69	NVE24305|HADP01189706.1	66	18.1818
NVE17328|HADO01000428.1	69	NVE9896	33	18.1818
NVE6207	76	NVE9896	33	18.1818
NVEC200_004869_1.1|Nvec_PRGamide	544	NVE24305|HADP01189706.1	66	18.1818
NVEC200_004869_1.1|Nvec_PRGamide	544	NVE9896	33	18.1818
NVE226	410	NVE24305|HADP01189706.1	66	18.1818
NVE226	410	NVE9896	33	18.1818
NVE4068	107	NVE9896	33	18.1818
NVE13034	286	NVE9896	33	18.1818
NVE24305|HADP01189706.1	66	NVEC200_000005_1.1	1018	18.1818
NVE24305|HADP01189706.1	66	NVEC200_003938_1.1	1775	18.1818
NVE24305|HADP01189706.1	66	NVE3865	71	18.1818
NVE24305|HADP01189706.1	66	NVE15529	211	18.1818
NVE24305|HADP01189706.1	66	NVE22972	977	18.1818
NVE24305|HADP01189706.1	66	NVEC200_005266_1.1	1464	18.1818
NVE24305|HADP01189706.1	66	NVE12918|HADO01001257.1	77	18.1818
NVE24305|HADP01189706.1	66	NVEC200_006106_1.1	615	18.1818
NVE24305|HADP01189706.1	66	NVE339	219	18.1818
NVE24305|HADP01189706.1	66	NVE24230	172	18.1818
NVE24305|HADP01189706.1	66	NVE4853	540	18.1818
NVE24305|HADP01189706.1	66	NVEC200_008652_1.1	757	18.1818
NVE20305	176	NVE9896	33	18.1818
NVEC200_012734_1.1	133	NVE9896	33	18.1818
NVE12327	82	NVE9896	33	18.1818
NVEC200_012735_1.1	376	NVE9896	33	18.1818
NVE20303	197	NVE9896	33	18.1818
NVEC200_013180_1.1	375	NVE9896	33	18.1818
NVE19082	767	NVE12918|HADO01001257.1	77	18.1818
NVE1473	202	NVE9896	33	18.1818
NVE24307|HADP01080760.1	69	NVE9896	33	18.1818
NVE11178|HADP01056499.1	64	NVE9896	33	18.1818
NVE7357	206	NVE12918|HADO01001257.1	77	18.1818
NVE7357	206	NVE9896	33	18.1818
NVE23858	679	NVE9896	33	18.1818
NVEC200_002800_1.1|Nvec_VRHamide	121	NVEC200_000296_1.1	419	18.1818
NVE9233	114	NVE9896	33	18.1818
NVE8232	104	NVE9896	33	18.1818
HADP01211238.1	71	NVE9896	33	18.1818
NVE18646	76	NVE9896	33	18.1818
NVE15529	211	NVE9896	33	18.1818
NVEC200_014051_1.1	592	NVE12918|HADO01001257.1	77	18.1818
NVEC200_012480_1.1	391	NVE12918|HADO01001257.1	77	18.1818
NVE21167	263	NVE9896	33	18.1818
NVE13213	186	NVE12918|HADO01001257.1	77	18.1818
NVEC200_005515_1.1	175	NVE12918|HADO01001257.1	77	18.1818
NVEC200_005515_1.1	175	NVE9896	33	18.1818
NVE7509	563	NVE12918|HADO01001257.1	77	18.1818
NVE12918|HADO01001257.1	77	NVE24290	5017	18.1818
NVE12918|HADO01001257.1	77	NVE9896	33	18.1818
NVE12918|HADO01001257.1	77	NVE339	219	18.1818
NVE12918|HADO01001257.1	77	NVE4853	540	18.1818
NVE12918|HADO01001257.1	77	NVE26068	123	18.1818
NVE12918|HADO01001257.1	77	NVE15505	345	18.1818
NVE12918|HADO01001257.1	77	NVE24582	471	18.1818
NVE12918|HADO01001257.1	77	NVE4012|Nvec_XP_032233649.1	269	18.1818
NVE12918|HADO01001257.1	77	NVEC200_004699_1.1	669	18.1818
NVE12918|HADO01001257.1	77	NVEC200_010517_1.1	282	18.1818
NVE12918|HADO01001257.1	77	NVEC200_000672_1.1	838	18.1818
NVE21426	182	NVE9896	33	18.1818
NVE5329	138	NVE9896	33	18.1818
NVE18122	300	NVE9896	33	18.1818
NVE9896	33	NVE339	219	18.1818
NVE9896	33	NVE5400	41	18.1818
NVE9896	33	NVE2973	253	18.1818
NVE9896	33	NVE2974	221	18.1818
NVE9896	33	NVE6636	158	18.1818
NVE9896	33	NVE15666	234	18.1818
NVE9896	33	NVE6394	377	18.1818
NVE9896	33	NVE4012|Nvec_XP_032233649.1	269	18.1818
NVE9896	33	NVEC200_012385_1.1	434	18.1818
NVE9896	33	NVEC200_010517_1.1	282	18.1818
NVE9896	33	NVEC200_005035_1.1	301	18.1818
Nvec_GLWamide	347	NVEC200_004869_1.1|Nvec_PRGamide	544	18.1556
NVE15340	1820	NVE5329	138	18.1159
NVE9858	296	NVE2974	221	18.0995
NVE5882	1075	NVE5454	72	18.0556
NVEC200_014617_1.1	524	NVE5454	72	18.0556
NVEC200_014078_1.1	412	NVE5454	72	18.0556
NVE7549|Nvec_RFamide	396	NVE5454	72	18.0556
NVEC200_005480_1.1	2251	NVE5454	72	18.0556
NVE5454	72	NVE15340	1820	18.0556
NVE5454	72	NVEC200_005266_1.1	1464	18.0556
NVE5454	72	NVEC200_004815_1.1	248	18.0556
NVE5454	72	NVE21750	248	18.0556
NVE5454	72	NVE13213	186	18.0556
NVE5454	72	NVEC200_004847_1.1	240	18.0556
NVE5454	72	NVE18847	490	18.0556
NVE5454	72	NVE4853	540	18.0556
NVE5454	72	NVEC200_000296_1.1	419	18.0556
NVE5454	72	NVEC200_000672_1.1	838	18.0556
NVE22972	977	NVE22353	122	18.0328
NVE24290	5017	NVE22353	122	18.0328
NVEC200_002806_1.1	112	NVE17329	78	17.9487
NVE5882	1075	NVE8376	78	17.9487
Nvec_GLWamide	347	NVE8376	78	17.9487
NVEC200_005480_1.1	2251	NVE8376	78	17.9487
NVE8376	78	NVEC200_000005_1.1	1018	17.9487
NVE8376	78	NVE7965	380	17.9487
NVE8376	78	NVE23858	679	17.9487
NVE8376	78	NVEC200_012480_1.1	391	17.9487
NVE8376	78	NVE7509	563	17.9487
NVE8376	78	NVEC200_006106_1.1	615	17.9487
NVE8376	78	NVEC200_004699_1.1	669	17.9487
NVE17329	78	NVE19082	767	17.9487
NVE17329	78	NVEC200_000005_1.1	1018	17.9487
NVE17329	78	NVE7965	380	17.9487
NVE17329	78	NVE15340	1820	17.9487
NVE17329	78	NVE22972	977	17.9487
NVE17329	78	NVEC200_005266_1.1	1464	17.9487
NVE17329	78	NVEC200_004815_1.1	248	17.9487
NVE17329	78	NVE7509	563	17.9487
NVE17329	78	NVEC200_006106_1.1	615	17.9487
NVE17329	78	NVE339	219	17.9487
NVE17329	78	NVEC200_004847_1.1	240	17.9487
NVE17329	78	NVE9107	767	17.9487
NVE17329	78	NVE6636	158	17.9487
NVE17329	78	NVE3482	378	17.9487
NVE17329	78	NVEC200_010517_1.1	282	17.9487
NVE17329	78	NVEC200_000672_1.1	838	17.9487
NVEC200_000005_1.1	1018	NVE3755	78	17.9487
NVE8232	104	NVE3755	78	17.9487
NVE3755	78	NVE21167	263	17.9487
NVE3755	78	NVE9858	296	17.9487
NVE3755	78	NVE16210	117	17.9487
NVE3755	78	NVE13213	186	17.9487
NVE3755	78	NVEC200_005515_1.1	175	17.9487
NVE3755	78	NVEC200_006106_1.1	615	17.9487
NVE226	410	NVEC200_005559_1.1	173	17.9191
NVEC200_000005_1.1	1018	Nvec_comp12848_Phoenixin	67	17.9104
NVEC200_008914_1.1	382	Nvec_comp12848_Phoenixin	67	17.9104
NVE7965	380	Nvec_comp12848_Phoenixin	67	17.9104
NVE23858	679	Nvec_comp12848_Phoenixin	67	17.9104
NVEC200_003938_1.1	1775	Nvec_comp12848_Phoenixin	67	17.9104
NVE1038	138	Nvec_comp12848_Phoenixin	67	17.9104
NVEC200_014051_1.1	592	Nvec_comp12848_Phoenixin	67	17.9104
NVEC200_005266_1.1	1464	Nvec_comp12848_Phoenixin	67	17.9104
NVE7509	563	Nvec_comp12848_Phoenixin	67	17.9104
NVEC200_006106_1.1	615	Nvec_comp12848_Phoenixin	67	17.9104
NVE2880	103	Nvec_comp12848_Phoenixin	67	17.9104
NVE22351	73	Nvec_comp12848_Phoenixin	67	17.9104
NVE2470	103	Nvec_comp12848_Phoenixin	67	17.9104
NVE22353	122	Nvec_comp12848_Phoenixin	67	17.9104
NVE24857	103	Nvec_comp12848_Phoenixin	67	17.9104
NVE4853	540	Nvec_comp12848_Phoenixin	67	17.9104
Nvec_comp12848_Phoenixin	67	NVE3482	378	17.9104
Nvec_comp12848_Phoenixin	67	NVEC200_012385_1.1	434	17.9104
Nvec_comp12848_Phoenixin	67	NVEC200_013996_1.1	313	17.9104
NVE15340	1820	NVE26068	123	17.8862
NVEC200_002806_1.1	112	NVEC200_006106_1.1	615	17.8571
NVEC200_002806_1.1	112	NVE15666	234	17.8571
NVE1820	270	NVE22000	73	17.8082
NVE2870	376	NVE22000	73	17.8082
NVEC200_014617_1.1	524	NVE22351	73	17.8082
Nvec_GLWamide	347	NVE22351	73	17.8082
NVE16146	581	NVE22351	73	17.8082
NVE20305	176	NVE22000	73	17.8082
NVEC200_012735_1.1	376	NVE22351	73	17.8082
NVEC200_012735_1.1	376	NVE22000	73	17.8082
NVE20303	197	NVE22000	73	17.8082
NVEC200_013180_1.1	375	NVE22000	73	17.8082
NVE19082	767	NVE22351	73	17.8082
NVE15340	1820	NVE22351	73	17.8082
NVEC200_014051_1.1	592	NVE22351	73	17.8082
NVEC200_014051_1.1	592	NVE22000	73	17.8082
NVE9858	296	NVE22351	73	17.8082
NVE13213	186	NVE22000	73	17.8082
NVEC200_005515_1.1	175	NVE22000	73	17.8082
NVE7509	563	NVE22351	73	17.8082
NVE7509	563	NVE22000	73	17.8082
NVE21426	182	NVE22000	73	17.8082
NVE339	219	NVE22351	73	17.8082
NVE18847	490	NVE22351	73	17.8082
NVE9107	767	NVE22000	73	17.8082
NVE22351	73	NVE24582	471	17.8082
NVE22351	73	NVE6394	377	17.8082
NVE22351	73	NVE4012|Nvec_XP_032233649.1	269	17.8082
NVE22351	73	NVEC200_000296_1.1	419	17.8082
NVE22351	73	NVEC200_010517_1.1	282	17.8082
NVE22351	73	NVEC200_000672_1.1	838	17.8082
NVE2973	253	NVE22000	73	17.8082
NVE22000	73	NVE4012|Nvec_XP_032233649.1	269	17.8082
NVE4068	107	NVEC200_003938_1.1	1775	17.757
NVE4068	107	NVE24290	5017	17.757
NVEC200_014617_1.1	524	NVE9956|HADO01002733.1	79	17.7215
NVE19548	87	NVE9956|HADO01002733.1	79	17.7215
NVE11072	218	NVE9956|HADO01002733.1	79	17.7215
NVEC200_005480_1.1	2251	NVE9956|HADO01002733.1	79	17.7215
NVEC200_002800_1.1|Nvec_VRHamide	121	NVE9956|HADO01002733.1	79	17.7215
NVEC200_003938_1.1	1775	NVE9956|HADO01002733.1	79	17.7215
NVE5882	1075	NVE18016	113	17.6991
NVE1820	270	NVE15078	68	17.6471
NVE2870	376	NVE15078	68	17.6471
Nvec_GLWamide	347	NVE4601	238	17.6471
Nvec_GLWamide	347	Nvec_RPamide_EDO37503.p1	85	17.6471
Nvec_GLWamide	347	NVE2974	221	17.6471
NVE11072	218	Nvec_RPamide_EDO37503.p1	85	17.6471
NVE4601	238	NVE15078	68	17.6471
NVEC200_012735_1.1	376	NVE15078	68	17.6471
NVEC200_013180_1.1	375	NVE15078	68	17.6471
NVE8677	136	NVE22972	977	17.6471
NVE8677	136	NVE24290	5017	17.6471
NVEC200_000005_1.1	1018	NVE15078	68	17.6471
NVE23858	679	NVE15078	68	17.6471
NVE15340	1820	NVE15078	68	17.6471
Nvec_RPamide_EDO37503.p1	85	NVE21167	263	17.6471
Nvec_RPamide_EDO37503.p1	85	NVE9858	296	17.6471
Nvec_RPamide_EDO37503.p1	85	NVE21426	182	17.6471
Nvec_RPamide_EDO37503.p1	85	NVE5329	138	17.6471
Nvec_RPamide_EDO37503.p1	85	NVEC200_000296_1.1	419	17.6471
NVEC200_012480_1.1	391	NVE15078	68	17.6471
Nvec_QWamide	325	NVE15078	68	17.6471
NVEC200_009895_1.1	294	NVE15078	68	17.6471
NVE2974	221	NVEC200_000296_1.1	419	17.6471
NVE15078	68	NVE6394	377	17.6471
NVE15078	68	NVEC200_012385_1.1	434	17.6471
NVE15078	68	NVEC200_004699_1.1	669	17.6471
NVE15078	68	NVEC200_000672_1.1	838	17.6471
NVE21167	263	NVE21426	182	17.5824
NVE1820	270	NVE3868	74	17.5676
NVEC200_014617_1.1	524	NVE3868	74	17.5676
NVEC200_009244_1.1	621	NVE3868	74	17.5676
Nvec_GLWamide	347	NVE3868	74	17.5676
NVE11072	218	NVE3868	74	17.5676
NVE226	410	NVE9858	296	17.5676
NVE226	410	NVE3868	74	17.5676
NVE1473	202	NVE3868	74	17.5676
NVEC200_008914_1.1	382	NVE3868	74	17.5676
NVE7965	380	NVE3868	74	17.5676
NVE23858	679	NVE3868	74	17.5676
NVE4782	86	NVE3868	74	17.5676
NVE22972	977	NVE3868	74	17.5676
NVE9858	296	NVE3868	74	17.5676
NVE5329	138	NVE3868	74	17.5676
NVEC200_006106_1.1	615	NVE3868	74	17.5676
NVE3868	74	NVE339	219	17.5676
NVE3868	74	NVEC200_013206_1.1	240	17.5676
NVE3868	74	NVE15069	213	17.5676
NVE3868	74	NVE9107	767	17.5676
NVE3868	74	NVE24230	172	17.5676
NVE3868	74	NVE15505	345	17.5676
NVE3868	74	NVEC200_008652_1.1	757	17.5676
NVE3868	74	NVEC200_004626_1.1	130	17.5676
NVE19548	87	NVE24308	57	17.5439
Nvec_GLWamide	347	NVE24308	57	17.5439
NVEC200_014078_1.1	412	NVE24308	57	17.5439
NVE7549|Nvec_RFamide	396	NVE24308	57	17.5439
NVEC200_002782_1.1	226	NVE24308	57	17.5439
NVEC200_005480_1.1	2251	NVE24308	57	17.5439
NVE24305|HADP01189706.1	66	NVE24308	57	17.5439
NVE19082	767	NVE24308	57	17.5439
NVE23858	679	NVE24308	57	17.5439
NVE8232	104	NVE24308	57	17.5439
NVEC200_014051_1.1	592	NVE24308	57	17.5439
NVEC200_012480_1.1	391	NVE24308	57	17.5439
Nvec_QWamide	325	NVE24308	57	17.5439
NVE7509	563	NVE24308	57	17.5439
NVEC200_006106_1.1	615	NVE24308	57	17.5439
NVE897	234	NVE24308	57	17.5439
NVE3868	74	NVE24308	57	17.5439
NVEC200_004847_1.1	240	NVE24308	57	17.5439
NVEC200_014828_1.1	233	NVE24308	57	17.5439
NVE4853	540	NVE24308	57	17.5439
NVE2974	221	NVE24308	57	17.5439
NVE6636	158	NVE24308	57	17.5439
NVE15666	234	NVE24308	57	17.5439
NVE3482	378	NVE24308	57	17.5439
NVE24308	57	NVE6394	377	17.5439
NVE24308	57	NVE4012|Nvec_XP_032233649.1	269	17.5439
NVE24308	57	NVEC200_012385_1.1	434	17.5439
NVE24308	57	NVEC200_000296_1.1	419	17.5439
NVE24308	57	NVEC200_010517_1.1	282	17.5439
NVE24308	57	NVEC200_000672_1.1	838	17.5439
NVE24308	57	NVEC200_005035_1.1	301	17.5439
NVEC200_003938_1.1	1775	NVE15677	137	17.5182
NVEC200_005480_1.1	2251	NVE24857	103	17.4757
NVE226	410	NVE2470	103	17.4757
NVEC200_003938_1.1	1775	NVE2880	103	17.4757
NVEC200_003938_1.1	1775	NVE2470	103	17.4757
NVE15340	1820	NVE2880	103	17.4757
NVE15340	1820	NVE24857	103	17.4757
NVEC200_014051_1.1	592	NVE2880	103	17.4757
NVE22972	977	NVE2880	103	17.4757
NVE22972	977	NVE2470	103	17.4757
NVE24290	5017	NVE2880	103	17.4757
NVE24290	5017	NVE2470	103	17.4757
NVE9107	767	NVE2880	103	17.4757
NVE9107	767	NVE2470	103	17.4757
NVE9107	767	NVE24857	103	17.4757
NVE2880	103	NVEC200_013996_1.1	313	17.4757
NVE2470	103	NVEC200_013996_1.1	313	17.4757
NVE24857	103	NVEC200_013996_1.1	313	17.4757
NVE23327	238	NVE4782	86	17.4419
NVE21713	237	NVE4782	86	17.4419
NVE11072	218	NVE4782	86	17.4419
NVEC200_004869_1.1|Nvec_PRGamide	544	NVE4782	86	17.4419
NVE226	410	NVE4782	86	17.4419
NVE19082	767	NVE4782	86	17.4419
NVEC200_003938_1.1	1775	NVE4782	86	17.4419
NVE4782	86	NVE897	234	17.4419
NVE4782	86	NVEC200_014828_1.1	233	17.4419
NVE4782	86	NVE15505	345	17.4419
NVE4782	86	NVE24582	471	17.4419
NVE4782	86	NVEC200_000672_1.1	838	17.4419
NVEC200_002806_1.1	112	NVE24307|HADP01080760.1	69	17.3913
NVEC200_002806_1.1	112	NVE21970	46	17.3913
NVE1820	270	NVE21970	46	17.3913
NVE2870	376	NVE17328|HADO01000428.1	69	17.3913
NVE2870	376	NVE21970	46	17.3913
NVEC200_014617_1.1	524	NVE24307|HADP01080760.1	69	17.3913
NVEC200_014617_1.1	524	NVE21970	46	17.3913
NVEC200_009244_1.1	621	NVE17328|HADO01000428.1	69	17.3913
NVEC200_009244_1.1	621	NVE21970	46	17.3913
NVE23327	238	NVE24307|HADP01080760.1	69	17.3913
NVE21713	237	NVE24307|HADP01080760.1	69	17.3913
NVE11072	218	NVE5329	138	17.3913
NVEC200_014078_1.1	412	NVE21970	46	17.3913
NVE7549|Nvec_RFamide	396	NVE21970	46	17.3913
NVE11271	155	NVE17328|HADO01000428.1	69	17.3913
NVEC200_005480_1.1	2251	NVE17328|HADO01000428.1	69	17.3913
NVEC200_005480_1.1	2251	NVE11386	92	17.3913
NVE17328|HADO01000428.1	69	NVE17329	78	17.3913
NVE17328|HADO01000428.1	69	NVE8927	178	17.3913
NVE17328|HADO01000428.1	69	NVE226	410	17.3913
NVE17328|HADO01000428.1	69	NVE13034	286	17.3913
NVE17328|HADO01000428.1	69	NVE23858	679	17.3913
NVE17328|HADO01000428.1	69	NVEC200_003938_1.1	1775	17.3913
NVE17328|HADO01000428.1	69	NVE8232	104	17.3913
NVE17328|HADO01000428.1	69	NVE1038	138	17.3913
NVE17328|HADO01000428.1	69	NVE13213	186	17.3913
NVE17328|HADO01000428.1	69	NVEC200_005515_1.1	175	17.3913
NVE17328|HADO01000428.1	69	NVE21426	182	17.3913
NVE17328|HADO01000428.1	69	NVE5329	138	17.3913
NVE17328|HADO01000428.1	69	NVE24290	5017	17.3913
NVE17328|HADO01000428.1	69	NVE339	219	17.3913
NVE17328|HADO01000428.1	69	NVEC200_014828_1.1	233	17.3913
NVE17328|HADO01000428.1	69	NVE4853	540	17.3913
NVE17328|HADO01000428.1	69	NVE6636	158	17.3913
NVE17328|HADO01000428.1	69	NVE26068	123	17.3913
NVE17328|HADO01000428.1	69	NVE3482	378	17.3913
NVE17328|HADO01000428.1	69	NVE16920	159	17.3913
NVE17328|HADO01000428.1	69	NVEC200_010517_1.1	282	17.3913
NVE17328|HADO01000428.1	69	NVEC200_005035_1.1	301	17.3913
NVE6207	76	NVE24307|HADP01080760.1	69	17.3913
NVEC200_004869_1.1|Nvec_PRGamide	544	NVE24307|HADP01080760.1	69	17.3913
NVEC200_004869_1.1|Nvec_PRGamide	544	NVE1038	138	17.3913
NVEC200_004869_1.1|Nvec_PRGamide	544	NVE24721	92	17.3913
NVE16146	581	NVE24307|HADP01080760.1	69	17.3913
NVE16146	581	NVE21970	46	17.3913
NVE4068	107	NVE21970	46	17.3913
NVE20305	176	NVE21970	46	17.3913
NVEC200_012734_1.1	133	NVE21970	46	17.3913
NVE4601	238	NVE21970	46	17.3913
NVE11386	92	NVE24307|HADP01080760.1	69	17.3913
NVE11386	92	NVE15340	1820	17.3913
NVE11386	92	NVE15529	211	17.3913
NVE11386	92	NVEC200_014051_1.1	592	17.3913
NVE11386	92	NVEC200_005266_1.1	1464	17.3913
NVE11386	92	NVE7509	563	17.3913
NVE11386	92	NVE24290	5017	17.3913
NVE11386	92	NVE16920	159	17.3913
NVE11386	92	NVEC200_000296_1.1	419	17.3913
NVEC200_012735_1.1	376	NVE24307|HADP01080760.1	69	17.3913
NVEC200_012735_1.1	376	NVE21970	46	17.3913
NVE20303	197	NVE21970	46	17.3913
NVEC200_013180_1.1	375	NVE24307|HADP01080760.1	69	17.3913
NVEC200_013180_1.1	375	NVE21970	46	17.3913
NVE19082	767	NVE24307|HADP01080760.1	69	17.3913
NVE24307|HADP01080760.1	69	NVE7357	206	17.3913
NVE24307|HADP01080760.1	69	NVE23858	679	17.3913
NVE24307|HADP01080760.1	69	NVEC200_002800_1.1|Nvec_VRHamide	121	17.3913
NVE24307|HADP01080760.1	69	NVE21167	263	17.3913
NVE24307|HADP01080760.1	69	NVE21750	248	17.3913
NVE24307|HADP01080760.1	69	NVE12918|HADO01001257.1	77	17.3913
NVE24307|HADP01080760.1	69	NVE18847	490	17.3913
NVE24307|HADP01080760.1	69	NVE13685	76	17.3913
NVE24307|HADP01080760.1	69	NVE9107	767	17.3913
NVE24307|HADP01080760.1	69	NVE16920	159	17.3913
NVE24307|HADP01080760.1	69	NVE15505	345	17.3913
NVE24307|HADP01080760.1	69	NVE24582	471	17.3913
NVE24307|HADP01080760.1	69	NVEC200_000672_1.1	838	17.3913
NVE21970	46	NVEC200_008914_1.1	382	17.3913
NVE21970	46	NVE7965	380	17.3913
NVE21970	46	NVEC200_002800_1.1|Nvec_VRHamide	121	17.3913
NVE21970	46	NVE8232	104	17.3913
NVE21970	46	NVE1038	138	17.3913
NVE21970	46	NVE3865	71	17.3913
NVE21970	46	Nvec_RPamide_EDO37503.p1	85	17.3913
NVE21970	46	NVE22972	977	17.3913
NVE21970	46	Nvec_QWamide	325	17.3913
NVE21970	46	NVE21167	263	17.3913
NVE21970	46	NVEC200_004815_1.1	248	17.3913
NVE21970	46	NVE21750	248	17.3913
NVE21970	46	NVE13213	186	17.3913
NVE21970	46	NVEC200_005515_1.1	175	17.3913
NVE21970	46	NVE21426	182	17.3913
NVE21970	46	NVEC200_006106_1.1	615	17.3913
NVE21970	46	NVE21658	265	17.3913
NVE21970	46	NVE339	219	17.3913
NVE21970	46	NVEC200_004847_1.1	240	17.3913
NVE21970	46	NVEC200_009895_1.1	294	17.3913
NVE21970	46	NVEC200_005559_1.1	173	17.3913
NVE21970	46	NVEC200_013206_1.1	240	17.3913
NVE21970	46	NVE15069	213	17.3913
NVE21970	46	Nvec_HIRamide	240	17.3913
NVE21970	46	NVE18847	490	17.3913
NVE21970	46	NVE2880	103	17.3913
NVE21970	46	NVE22351	73	17.3913
NVE21970	46	NVE2470	103	17.3913
NVE21970	46	NVE22353	122	17.3913
NVE21970	46	NVE24857	103	17.3913
NVE21970	46	NVE18016	113	17.3913
NVE21970	46	NVE4853	540	17.3913
NVE21970	46	NVE26068	123	17.3913
NVE21970	46	NVE22000	73	17.3913
NVE21970	46	NVE24582	471	17.3913
NVE21970	46	NVE6394	377	17.3913
NVE21970	46	NVE4012|Nvec_XP_032233649.1	269	17.3913
NVE21970	46	NVEC200_012385_1.1	434	17.3913
NVE21970	46	NVEC200_004626_1.1	130	17.3913
NVE21970	46	NVEC200_005035_1.1	301	17.3913
NVE23858	679	NVE24721	92	17.3913
NVE5329	138	NVEC200_012385_1.1	434	17.3913
NVE4853	540	NVE24721	92	17.3913
NVE16146	581	NVEC200_002800_1.1|Nvec_VRHamide	121	17.3554
NVE5882	1075	NVE20161	75	17.3333
NVE16146	581	NVE20161	75	17.3333
NVEC200_000005_1.1	1018	NVE20161	75	17.3333
NVE20161	75	NVEC200_003938_1.1	1775	17.3333
NVE20161	75	NVE15340	1820	17.3333
NVE20161	75	NVEC200_012480_1.1	391	17.3333
NVE20161	75	NVEC200_004815_1.1	248	17.3333
NVE20161	75	NVE21750	248	17.3333
NVE20161	75	NVE9858	296	17.3333
NVE20161	75	NVEC200_013206_1.1	240	17.3333
NVE20161	75	NVE15069	213	17.3333
NVE20161	75	Nvec_HIRamide	240	17.3333
NVE20161	75	NVE24230	172	17.3333
NVE20161	75	NVEC200_008652_1.1	757	17.3333
NVE20161	75	NVEC200_000296_1.1	419	17.3333
NVE226	410	NVEC200_000296_1.1	419	17.3171
Nvec_GLWamide	347	NVE8232	104	17.3077
NVE8927	178	NVE8232	104	17.3077
NVE15340	1820	NVE8232	104	17.3077
NVE8232	104	NVE1038	138	17.3077
NVE8232	104	NVE24290	5017	17.3077
NVE8232	104	NVE9107	767	17.3077
NVE8232	104	NVE24230	172	17.3077
NVEC200_012734_1.1	133	NVEC200_008652_1.1	757	17.2932
NVE5882	1075	NVE19548	87	17.2414
NVE19548	87	NVE11072	218	17.2414
NVE19548	87	NVEC200_005480_1.1	2251	17.2414
NVE19548	87	NVEC200_004869_1.1|Nvec_PRGamide	544	17.2414
NVE19548	87	NVE226	410	17.2414
NVE19548	87	NVEC200_003938_1.1	1775	17.2414
NVE19548	87	NVE8232	104	17.2414
NVE19548	87	NVEC200_012480_1.1	391	17.2414
NVE19548	87	NVEC200_005266_1.1	1464	17.2414
NVE19548	87	Nvec_QWamide	325	17.2414
NVE19548	87	NVEC200_006106_1.1	615	17.2414
NVE19548	87	NVEC200_013206_1.1	240	17.2414
NVE19548	87	NVE15069	213	17.2414
NVE19548	87	Nvec_HIRamide	240	17.2414
NVE19548	87	NVE15505	345	17.2414
NVE19548	87	NVEC200_013996_1.1	313	17.2414
NVE4601	238	NVEC200_000296_1.1	419	17.2269
NVEC200_005266_1.1	1464	NVE22353	122	17.2131
NVE9107	767	NVE22353	122	17.2131
NVE1820	270	NVE11178|HADP01056499.1	64	17.1875
NVE2870	376	NVE11178|HADP01056499.1	64	17.1875
NVEC200_014617_1.1	524	NVE11178|HADP01056499.1	64	17.1875
NVEC200_009244_1.1	621	NVE11178|HADP01056499.1	64	17.1875
NVE11072	218	NVE11178|HADP01056499.1	64	17.1875
NVEC200_002782_1.1	226	NVE11178|HADP01056499.1	64	17.1875
NVEC200_004869_1.1|Nvec_PRGamide	544	NVE11178|HADP01056499.1	64	17.1875
NVE226	410	NVE11178|HADP01056499.1	64	17.1875
NVEC200_012735_1.1	376	NVE11178|HADP01056499.1	64	17.1875
NVEC200_013180_1.1	375	NVE11178|HADP01056499.1	64	17.1875
NVE19082	767	NVE11178|HADP01056499.1	64	17.1875
NVE1473	202	NVE11178|HADP01056499.1	64	17.1875
NVE11178|HADP01056499.1	64	NVE5454	72	17.1875
NVE11178|HADP01056499.1	64	NVE23858	679	17.1875
NVE11178|HADP01056499.1	64	NVE9233	114	17.1875
NVE11178|HADP01056499.1	64	NVEC200_003938_1.1	1775	17.1875
NVE11178|HADP01056499.1	64	NVE15340	1820	17.1875
NVE11178|HADP01056499.1	64	NVE1038	138	17.1875
NVE11178|HADP01056499.1	64	Nvec_RPamide_EDO37503.p1	85	17.1875
NVE11178|HADP01056499.1	64	NVE21167	263	17.1875
NVE11178|HADP01056499.1	64	NVEC200_004847_1.1	240	17.1875
NVE11178|HADP01056499.1	64	NVEC200_005559_1.1	173	17.1875
NVE11178|HADP01056499.1	64	NVEC200_013206_1.1	240	17.1875
NVE11178|HADP01056499.1	64	Nvec_HIRamide	240	17.1875
NVE11178|HADP01056499.1	64	NVE13685	76	17.1875
NVE11178|HADP01056499.1	64	NVE9107	767	17.1875
NVE11178|HADP01056499.1	64	NVE24230	172	17.1875
NVE11178|HADP01056499.1	64	NVEC200_014058_1.1	178	17.1875
NVE11178|HADP01056499.1	64	NVE4853	540	17.1875
NVE11178|HADP01056499.1	64	NVE7520	176	17.1875
NVE11178|HADP01056499.1	64	NVE2974	221	17.1875
NVE11178|HADP01056499.1	64	NVE10634	76	17.1875
NVE11178|HADP01056499.1	64	NVE24582	471	17.1875
NVE11178|HADP01056499.1	64	NVEC200_000672_1.1	838	17.1875
NVE11178|HADP01056499.1	64	NVEC200_005035_1.1	301	17.1875
NVE11072	218	NVE12742	70	17.1429
NVEC200_005480_1.1	2251	NVE12742	70	17.1429
NVEC200_004869_1.1|Nvec_PRGamide	544	NVE12742	70	17.1429
NVE226	410	NVE12742	70	17.1429
NVE19082	767	NVE12742	70	17.1429
NVEC200_008914_1.1	382	NVE12742	70	17.1429
NVE7965	380	NVE12742	70	17.1429
NVE23858	679	NVE12742	70	17.1429
NVE12742	70	NVE15529	211	17.1429
NVE12742	70	NVE21167	263	17.1429
NVE12742	70	NVE9858	296	17.1429
NVE12742	70	NVE13213	186	17.1429
NVE12742	70	NVEC200_005515_1.1	175	17.1429
NVE12742	70	NVEC200_013206_1.1	240	17.1429
NVE12742	70	NVE15069	213	17.1429
NVE12742	70	Nvec_HIRamide	240	17.1429
NVE12742	70	NVE13685	76	17.1429
NVE12742	70	NVE9107	767	17.1429
NVE12742	70	NVE7771	130	17.1429
NVE12742	70	NVE4853	540	17.1429
NVE12742	70	NVE22000	73	17.1429
NVE12742	70	NVE3482	378	17.1429
NVE12742	70	NVE6394	377	17.1429
NVE12742	70	NVE4012|Nvec_XP_032233649.1	269	17.1429
NVE12742	70	NVE15677	137	17.1429
NVE12742	70	NVEC200_000672_1.1	838	17.1429
NVE5882	1075	NVE6207	76	17.1053
NVE1820	270	NVE18646	76	17.1053
NVEC200_014617_1.1	524	NVE10634	76	17.1053
NVEC200_009244_1.1	621	NVE18646	76	17.1053
Nvec_GLWamide	347	NVE6207	76	17.1053
Nvec_GLWamide	347	NVE13685	76	17.1053
NVE23327	238	NVE18646	76	17.1053
NVE23327	238	NVE10634	76	17.1053
NVE21713	237	NVE18646	76	17.1053
NVE11072	218	NVE6207	76	17.1053
NVE11072	218	NVE10634	76	17.1053
NVEC200_005480_1.1	2251	NVE18646	76	17.1053
NVE6207	76	NVE226	410	17.1053
NVE6207	76	NVEC200_013180_1.1	375	17.1053
NVE6207	76	NVE19082	767	17.1053
NVE6207	76	NVE1473	202	17.1053
NVE6207	76	NVEC200_000005_1.1	1018	17.1053
NVE6207	76	NVE7965	380	17.1053
NVE6207	76	NVE23858	679	17.1053
NVE6207	76	NVEC200_003938_1.1	1775	17.1053
NVE6207	76	NVEC200_012480_1.1	391	17.1053
NVE6207	76	NVE22972	977	17.1053
NVE6207	76	Nvec_QWamide	325	17.1053
NVE6207	76	NVE21167	263	17.1053
NVE6207	76	NVE5329	138	17.1053
NVE6207	76	NVE15069	213	17.1053
NVE6207	76	NVE13685	76	17.1053
NVE6207	76	NVE4853	540	17.1053
NVE6207	76	NVE4012|Nvec_XP_032233649.1	269	17.1053
NVE6207	76	NVEC200_004699_1.1	669	17.1053
NVE6207	76	NVEC200_000296_1.1	419	17.1053
NVE16146	581	NVE18646	76	17.1053
NVEC200_012735_1.1	376	NVE18646	76	17.1053
NVEC200_012735_1.1	376	NVE13685	76	17.1053
NVEC200_013180_1.1	375	NVE13685	76	17.1053
NVE19082	767	NVE13685	76	17.1053
NVE1473	202	NVE13685	76	17.1053
NVEC200_008914_1.1	382	NVE18646	76	17.1053
NVEC200_008914_1.1	382	NVE13685	76	17.1053
NVE7965	380	NVE13685	76	17.1053
NVE23858	679	NVE10634	76	17.1053
NVEC200_002800_1.1|Nvec_VRHamide	121	NVE13685	76	17.1053
NVEC200_003938_1.1	1775	NVE13685	76	17.1053
NVEC200_003938_1.1	1775	NVE10634	76	17.1053
NVE15340	1820	NVE10634	76	17.1053
NVE8232	104	NVE18646	76	17.1053
NVE18646	76	NVE15529	211	17.1053
NVE18646	76	NVEC200_014051_1.1	592	17.1053
NVE18646	76	NVE13213	186	17.1053
NVE18646	76	NVEC200_005515_1.1	175	17.1053
NVE18646	76	NVE24290	5017	17.1053
NVE18646	76	NVE339	219	17.1053
NVE18646	76	NVE24230	172	17.1053
NVE18646	76	NVEC200_014058_1.1	178	17.1053
NVE18646	76	NVE7520	176	17.1053
NVE18646	76	NVE9956|HADO01002733.1	79	17.1053
NVE18646	76	NVE3482	378	17.1053
NVE18646	76	NVE24721	92	17.1053
NVE18646	76	NVE10634	76	17.1053
NVE18646	76	NVEC200_008652_1.1	757	17.1053
NVE15529	211	NVE13685	76	17.1053
NVEC200_004815_1.1	248	NVE10634	76	17.1053
NVE21750	248	NVE10634	76	17.1053
NVE12918|HADO01001257.1	77	NVE13685	76	17.1053
NVE5329	138	NVE13685	76	17.1053
NVEC200_006106_1.1	615	NVE13685	76	17.1053
NVE24290	5017	NVE13685	76	17.1053
NVE897	234	NVE13685	76	17.1053
NVEC200_005559_1.1	173	NVE13685	76	17.1053
NVEC200_013206_1.1	240	NVE13685	76	17.1053
NVE15069	213	NVE13685	76	17.1053
Nvec_HIRamide	240	NVE13685	76	17.1053
NVE18847	490	NVE10634	76	17.1053
NVE13685	76	NVEC200_004380_1.1	201	17.1053
NVE13685	76	NVE9956|HADO01002733.1	79	17.1053
NVE13685	76	NVE3482	378	17.1053
NVE13685	76	NVEC200_000672_1.1	838	17.1053
NVE9107	767	NVE10634	76	17.1053
NVE24230	172	NVE10634	76	17.1053
NVE15666	234	NVE10634	76	17.1053
NVE10634	76	NVE15677	137	17.1053
NVE16210	117	NVE2973	253	17.094
NVE16210	117	NVE2974	221	17.094
NVE16210	117	NVEC200_005035_1.1	301	17.094
NVE6636	158	NVEC200_000296_1.1	419	17.0886
NVEC200_004869_1.1|Nvec_PRGamide	544	Nvec_HIRamide	240	17.0833
NVE1820	270	NVE5400	41	17.0732
NVE2870	376	NVE5400	41	17.0732
NVE22506	162	NVE5400	41	17.0732
NVE19548	87	NVE12327	82	17.0732
NVE23327	238	NVE5400	41	17.0732
NVE21713	237	NVE5400	41	17.0732
NVE11072	218	NVE12327	82	17.0732
NVE11072	218	NVE5400	41	17.0732
NVEC200_014078_1.1	412	NVE5400	41	17.0732
NVE7549|Nvec_RFamide	396	NVE5400	41	17.0732
NVE11271	155	NVE5400	41	17.0732
NVE6207	76	NVE5400	41	17.0732
NVE16146	581	NVE12327	82	17.0732
NVE16146	581	NVE5400	41	17.0732
NVE13034	286	NVE5400	41	17.0732
NVE24305|HADP01189706.1	66	NVE5400	41	17.0732
NVE20305	176	NVE5400	41	17.0732
NVEC200_012734_1.1	133	NVE12327	82	17.0732
NVE12327	82	NVEC200_012735_1.1	376	17.0732
NVE12327	82	NVEC200_008914_1.1	382	17.0732
NVE12327	82	NVEC200_005266_1.1	1464	17.0732
NVE12327	82	NVE339	219	17.0732
NVE12327	82	NVE15505	345	17.0732
NVEC200_012735_1.1	376	NVE5400	41	17.0732
NVE20303	197	NVE5400	41	17.0732
NVEC200_013180_1.1	375	NVE5400	41	17.0732
NVE24307|HADP01080760.1	69	NVE5400	41	17.0732
NVE11178|HADP01056499.1	64	NVE5400	41	17.0732
NVE8677	136	NVE5400	41	17.0732
NVEC200_008914_1.1	382	NVE5400	41	17.0732
NVE7965	380	NVE5400	41	17.0732
NVE7357	206	NVE5400	41	17.0732
NVE7357	206	NVE26068	123	17.0732
NVE23858	679	NVE26068	123	17.0732
NVEC200_002800_1.1|Nvec_VRHamide	121	NVE5400	41	17.0732
NVE12742	70	NVE5400	41	17.0732
NVEC200_003938_1.1	1775	NVE26068	123	17.0732
NVE1038	138	NVE5400	41	17.0732
NVE4782	86	NVE5400	41	17.0732
NVEC200_014051_1.1	592	NVE5400	41	17.0732
Nvec_QWamide	325	NVE5400	41	17.0732
NVEC200_004815_1.1	248	NVE5400	41	17.0732
NVE9858	296	NVE5400	41	17.0732
NVE7509	563	NVE5400	41	17.0732
NVE21426	182	NVE5400	41	17.0732
NVE5329	138	NVE5400	41	17.0732
NVEC200_006106_1.1	615	NVE26068	123	17.0732
NVE18122	300	NVE5400	41	17.0732
NVEC200_009895_1.1	294	NVE5400	41	17.0732
NVEC200_013206_1.1	240	NVE5400	41	17.0732
Nvec_HIRamide	240	NVE5400	41	17.0732
NVE13685	76	NVE5400	41	17.0732
NVE5400	41	NVE2880	103	17.0732
NVE5400	41	NVE22351	73	17.0732
NVE5400	41	NVE2470	103	17.0732
NVE5400	41	NVE22353	122	17.0732
NVE5400	41	NVE24230	172	17.0732
NVE5400	41	NVEC200_014058_1.1	178	17.0732
NVE5400	41	NVE7520	176	17.0732
NVE5400	41	NVE2973	253	17.0732
NVE5400	41	NVE2974	221	17.0732
NVE5400	41	NVE6636	158	17.0732
NVE5400	41	NVE26068	123	17.0732
NVE5400	41	NVE24610	60	17.0732
NVE5400	41	NVE24582	471	17.0732
NVE5400	41	NVE6394	377	17.0732
NVE5400	41	NVE4012|Nvec_XP_032233649.1	269	17.0732
NVE5400	41	NVEC200_010517_1.1	282	17.0732
NVE21426	182	NVE4853	540	17.033
NVE24290	5017	NVE16920	159	16.9811
NVEC200_002806_1.1	112	NVEC200_004869_1.1|Nvec_PRGamide	544	16.9643
NVEC200_002806_1.1	112	NVEC200_000005_1.1	1018	16.9643
NVEC200_002806_1.1	112	NVE23858	679	16.9643
NVEC200_002806_1.1	112	NVEC200_003938_1.1	1775	16.9643
NVEC200_002806_1.1	112	NVE1038	138	16.9643
NVEC200_002806_1.1	112	NVE21426	182	16.9643
Nvec_GLWamide	347	NVEC200_005035_1.1	301	16.9435
NVEC200_000296_1.1	419	NVEC200_005035_1.1	301	16.9435
NVE5882	1075	NVEC200_004626_1.1	130	16.9231
NVEC200_009244_1.1	621	NVEC200_004626_1.1	130	16.9231
NVEC200_000005_1.1	1018	NVE7771	130	16.9231
NVEC200_003938_1.1	1775	NVEC200_004626_1.1	130	16.9231
NVEC200_005480_1.1	2251	NVE8677	136	16.9118
NVEC200_004869_1.1|Nvec_PRGamide	544	NVE8677	136	16.9118
NVE19082	767	NVE8677	136	16.9118
NVE5882	1075	HADP01211238.1	71	16.9014
NVE22506	162	NVE3865	71	16.9014
NVEC200_009244_1.1	621	NVE3865	71	16.9014
NVE19548	87	HADP01262889.1	71	16.9014
NVE11072	218	HADP01262889.1	71	16.9014
NVE11072	218	NVE3865	71	16.9014
NVEC200_014078_1.1	412	NVE3865	71	16.9014
NVE7549|Nvec_RFamide	396	NVE3865	71	16.9014
NVEC200_002782_1.1	226	HADP01211238.1	71	16.9014
HADP01262889.1	71	NVEC200_004869_1.1|Nvec_PRGamide	544	16.9014
HADP01262889.1	71	NVE19082	767	16.9014
HADP01262889.1	71	NVE1473	202	16.9014
HADP01262889.1	71	NVE23858	679	16.9014
HADP01262889.1	71	NVEC200_002800_1.1|Nvec_VRHamide	121	16.9014
HADP01262889.1	71	NVEC200_014051_1.1	592	16.9014
HADP01262889.1	71	NVEC200_012480_1.1	391	16.9014
HADP01262889.1	71	NVE13213	186	16.9014
HADP01262889.1	71	NVEC200_005515_1.1	175	16.9014
HADP01262889.1	71	NVE7509	563	16.9014
HADP01262889.1	71	NVEC200_004847_1.1	240	16.9014
HADP01262889.1	71	NVE18847	490	16.9014
HADP01262889.1	71	NVEC200_014828_1.1	233	16.9014
HADP01262889.1	71	NVE24230	172	16.9014
HADP01262889.1	71	NVE15666	234	16.9014
HADP01262889.1	71	NVE16920	159	16.9014
HADP01262889.1	71	NVEC200_013996_1.1	313	16.9014
HADP01262889.1	71	NVEC200_000672_1.1	838	16.9014
NVE17329	78	NVE3865	71	16.9014
NVE8927	178	HADP01211238.1	71	16.9014
NVEC200_012734_1.1	133	HADP01211238.1	71	16.9014
NVE20303	197	NVE3865	71	16.9014
NVE19082	767	NVE3865	71	16.9014
NVE1473	202	HADP01211238.1	71	16.9014
NVE20161	75	NVE3865	71	16.9014
NVE7965	380	NVE3865	71	16.9014
NVE15340	1820	NVE3865	71	16.9014
HADP01211238.1	71	Nvec_RPamide_EDO37503.p1	85	16.9014
HADP01211238.1	71	NVE22972	977	16.9014
HADP01211238.1	71	NVE21426	182	16.9014
HADP01211238.1	71	NVEC200_006106_1.1	615	16.9014
HADP01211238.1	71	NVE3868	74	16.9014
HADP01211238.1	71	NVE13685	76	16.9014
HADP01211238.1	71	NVE9107	767	16.9014
HADP01211238.1	71	NVE2470	103	16.9014
HADP01211238.1	71	NVE24857	103	16.9014
HADP01211238.1	71	NVE24230	172	16.9014
HADP01211238.1	71	NVE4853	540	16.9014
HADP01211238.1	71	NVE2973	253	16.9014
HADP01211238.1	71	NVE2974	221	16.9014
HADP01211238.1	71	NVE26068	123	16.9014
HADP01211238.1	71	NVE10634	76	16.9014
HADP01211238.1	71	NVE6394	377	16.9014
HADP01211238.1	71	NVE4012|Nvec_XP_032233649.1	269	16.9014
HADP01211238.1	71	NVEC200_012385_1.1	434	16.9014
NVE18646	76	NVE3865	71	16.9014
NVE3865	71	NVE13213	186	16.9014
NVE3865	71	NVE12918|HADO01001257.1	77	16.9014
NVE3865	71	NVE5329	138	16.9014
NVE3865	71	NVEC200_006106_1.1	615	16.9014
NVE3865	71	NVE897	234	16.9014
NVE3865	71	NVE15069	213	16.9014
NVE3865	71	NVEC200_014828_1.1	233	16.9014
NVE3865	71	NVEC200_014058_1.1	178	16.9014
NVE3865	71	NVE7520	176	16.9014
NVE3865	71	NVE2974	221	16.9014
NVE3865	71	NVE10634	76	16.9014
NVE3865	71	NVE15505	345	16.9014
NVE15069	213	NVEC200_000296_1.1	419	16.9014
NVE21713	237	NVE12918|HADO01001257.1	77	16.8831
NVEC200_002782_1.1	226	NVE12918|HADO01001257.1	77	16.8831
NVEC200_005480_1.1	2251	NVE12918|HADO01001257.1	77	16.8831
NVE1473	202	NVE12918|HADO01001257.1	77	16.8831
NVE23858	679	NVE12918|HADO01001257.1	77	16.8831
NVE8232	104	NVE12918|HADO01001257.1	77	16.8831
NVEC200_005266_1.1	1464	NVE12918|HADO01001257.1	77	16.8831
NVE12918|HADO01001257.1	77	NVEC200_006106_1.1	615	16.8831
NVE12918|HADO01001257.1	77	NVEC200_004847_1.1	240	16.8831
NVE12918|HADO01001257.1	77	NVEC200_014828_1.1	233	16.8831
NVE12918|HADO01001257.1	77	NVE2973	253	16.8831
NVE12918|HADO01001257.1	77	NVE6636	158	16.8831
NVE12918|HADO01001257.1	77	NVE3482	378	16.8831
NVE4068	107	NVE19082	767	16.8224
NVE4068	107	NVEC200_008914_1.1	382	16.8224
NVE4068	107	NVE15340	1820	16.8224
NVE19082	767	NVE18016	113	16.8142
NVE18016	113	NVE3482	378	16.8142
NVEC200_014617_1.1	524	NVE15677	137	16.7883
NVEC200_005480_1.1	2251	NVE15677	137	16.7883
NVE19082	767	NVE15677	137	16.7883
NVE18847	490	NVE15677	137	16.7883
NVEC200_004869_1.1|Nvec_PRGamide	544	NVEC200_005559_1.1	173	16.763
NVE226	410	NVE4012|Nvec_XP_032233649.1	269	16.7286
NVEC200_002806_1.1	112	NVE2302	66	16.6667
NVEC200_002806_1.1	112	NVE24610	60	16.6667
NVE5882	1075	NVE2302	66	16.6667
NVE5882	1075	NVE17329	78	16.6667
NVE5882	1075	NVE21004	60	16.6667
NVE1820	270	NVE24305|HADP01189706.1	66	16.6667
NVE2870	376	NVE24305|HADP01189706.1	66	16.6667
NVE2870	376	NVE24610	60	16.6667
NVE22506	162	NVE2302	66	16.6667
NVE22506	162	NVE17329	78	16.6667
NVEC200_014617_1.1	524	NVE9233	114	16.6667
NVEC200_014617_1.1	524	NVE1038	138	16.6667
NVEC200_009244_1.1	621	NVE2302	66	16.6667
NVEC200_009244_1.1	621	NVE17329	78	16.6667
NVEC200_009244_1.1	621	NVE24305|HADP01189706.1	66	16.6667
NVEC200_009244_1.1	621	NVE21004	60	16.6667
NVE19548	87	NVE5454	72	16.6667
Nvec_GLWamide	347	NVE24305|HADP01189706.1	66	16.6667
Nvec_GLWamide	347	NVE24610	60	16.6667
NVE23327	238	NVE24305|HADP01189706.1	66	16.6667
NVE23327	238	NVE24610	60	16.6667
NVE21713	237	NVE2302	66	16.6667
NVE21713	237	NVE24305|HADP01189706.1	66	16.6667
NVE21713	237	NVE24610	60	16.6667
NVE11072	218	NVE24305|HADP01189706.1	66	16.6667
NVE11072	218	NVE5454	72	16.6667
NVEC200_014078_1.1	412	NVE21004	60	16.6667
NVE7549|Nvec_RFamide	396	NVE17329	78	16.6667
NVE7549|Nvec_RFamide	396	NVE21004	60	16.6667
NVE11271	155	NVE24305|HADP01189706.1	66	16.6667
NVE11271	155	NVE24610	60	16.6667
NVE2302	66	NVE17329	78	16.6667
NVE2302	66	NVE8927	178	16.6667
NVE2302	66	NVEC200_004869_1.1|Nvec_PRGamide	544	16.6667
NVE2302	66	NVE226	410	16.6667
NVE2302	66	NVE4601	238	16.6667
NVE2302	66	NVE1473	202	16.6667
NVE2302	66	NVE23858	679	16.6667
NVE2302	66	NVEC200_002800_1.1|Nvec_VRHamide	121	16.6667
NVE2302	66	NVE12742	70	16.6667
NVE2302	66	NVE1038	138	16.6667
NVE2302	66	NVE3865	71	16.6667
NVE2302	66	NVE3755	78	16.6667
NVE2302	66	NVEC200_014051_1.1	592	16.6667
NVE2302	66	NVE9858	296	16.6667
NVE2302	66	NVE7509	563	16.6667
NVE2302	66	NVE5329	138	16.6667
NVE2302	66	NVE18122	300	16.6667
NVE2302	66	NVEC200_004847_1.1	240	16.6667
NVE2302	66	NVEC200_005559_1.1	173	16.6667
NVE2302	66	NVE15069	213	16.6667
NVE2302	66	NVE24230	172	16.6667
NVE2302	66	NVE6636	158	16.6667
NVE2302	66	NVE16920	159	16.6667
NVE2302	66	NVE4012|Nvec_XP_032233649.1	269	16.6667
NVE2302	66	NVEC200_008652_1.1	757	16.6667
NVE2302	66	NVEC200_013996_1.1	313	16.6667
NVEC200_005480_1.1	2251	NVE17329	78	16.6667
NVE8376	78	NVE226	410	16.6667
NVE8376	78	NVE19082	767	16.6667
NVE8376	78	NVEC200_002800_1.1|Nvec_VRHamide	121	16.6667
NVE8376	78	NVEC200_014051_1.1	592	16.6667
NVE8376	78	NVEC200_005266_1.1	1464	16.6667
NVE8376	78	NVE9858	296	16.6667
NVE8376	78	NVE21426	182	16.6667
NVE8376	78	NVE9107	767	16.6667
NVE8376	78	NVE3482	378	16.6667
NVE8376	78	NVEC200_000296_1.1	419	16.6667
NVE8376	78	NVEC200_000672_1.1	838	16.6667
NVE17329	78	NVE5454	72	16.6667
NVE17329	78	NVEC200_008914_1.1	382	16.6667
NVE17329	78	NVEC200_003938_1.1	1775	16.6667
NVE17329	78	NVE3755	78	16.6667
NVE17329	78	Nvec_RPamide_EDO37503.p1	85	16.6667
NVE17329	78	NVE15529	211	16.6667
NVE17329	78	NVEC200_014051_1.1	592	16.6667
NVE17329	78	NVE9858	296	16.6667
NVE17329	78	NVE24290	5017	16.6667
NVE17329	78	NVE4853	540	16.6667
NVE17329	78	NVE2974	221	16.6667
NVE17329	78	NVE15666	234	16.6667
NVE17329	78	NVE24582	471	16.6667
NVE17329	78	NVE4012|Nvec_XP_032233649.1	269	16.6667
NVE17329	78	NVEC200_012385_1.1	434	16.6667
NVE17329	78	NVEC200_004699_1.1	669	16.6667
NVE17329	78	NVEC200_005035_1.1	301	16.6667
NVE8927	178	NVE5454	72	16.6667
NVE8927	178	NVE21004	60	16.6667
NVEC200_004869_1.1|Nvec_PRGamide	544	NVE3755	78	16.6667
NVEC200_004869_1.1|Nvec_PRGamide	544	NVE24610	60	16.6667
NVE226	410	NVE1038	138	16.6667
NVE226	410	NVE3755	78	16.6667
NVE226	410	NVE24610	60	16.6667
NVE16146	581	NVE5454	72	16.6667
NVE16146	581	NVE24610	60	16.6667
NVE4068	107	NVE21004	60	16.6667
NVE13034	286	NVE24305|HADP01189706.1	66	16.6667
NVE24305|HADP01189706.1	66	NVE20305	176	16.6667
NVE24305|HADP01189706.1	66	NVE11386	92	16.6667
NVE24305|HADP01189706.1	66	NVEC200_012735_1.1	376	16.6667
NVE24305|HADP01189706.1	66	NVE20303	197	16.6667
NVE24305|HADP01189706.1	66	NVEC200_013180_1.1	375	16.6667
NVE24305|HADP01189706.1	66	NVE19082	767	16.6667
NVE24305|HADP01189706.1	66	NVEC200_008914_1.1	382	16.6667
NVE24305|HADP01189706.1	66	NVE7965	380	16.6667
NVE24305|HADP01189706.1	66	NVEC200_002800_1.1|Nvec_VRHamide	121	16.6667
NVE24305|HADP01189706.1	66	NVE12742	70	16.6667
NVE24305|HADP01189706.1	66	NVE15340	1820	16.6667
NVE24305|HADP01189706.1	66	NVE8232	104	16.6667
NVE24305|HADP01189706.1	66	NVE3755	78	16.6667
NVE24305|HADP01189706.1	66	NVE13213	186	16.6667
NVE24305|HADP01189706.1	66	NVE5329	138	16.6667
NVE24305|HADP01189706.1	66	NVE24290	5017	16.6667
NVE24305|HADP01189706.1	66	NVE18122	300	16.6667
NVE24305|HADP01189706.1	66	NVEC200_009895_1.1	294	16.6667
NVE24305|HADP01189706.1	66	NVEC200_014058_1.1	178	16.6667
NVE24305|HADP01189706.1	66	NVE2973	253	16.6667
NVE24305|HADP01189706.1	66	NVE9956|HADO01002733.1	79	16.6667
NVE24305|HADP01189706.1	66	NVE6636	158	16.6667
NVE24305|HADP01189706.1	66	NVE10634	76	16.6667
NVE24305|HADP01189706.1	66	NVE24582	471	16.6667
NVE24305|HADP01189706.1	66	NVE6394	377	16.6667
NVE24305|HADP01189706.1	66	NVEC200_013996_1.1	313	16.6667
NVE24305|HADP01189706.1	66	NVEC200_010517_1.1	282	16.6667
NVE24305|HADP01189706.1	66	NVEC200_000672_1.1	838	16.6667
NVE24305|HADP01189706.1	66	NVEC200_005035_1.1	301	16.6667
NVEC200_012734_1.1	133	NVE24610	60	16.6667
NVE11386	92	NVE3755	78	16.6667
NVEC200_012735_1.1	376	NVE24610	60	16.6667
NVEC200_013180_1.1	375	NVE24610	60	16.6667
NVE1473	202	NVE24610	60	16.6667
NVEC200_000005_1.1	1018	NVE5454	72	16.6667
NVEC200_000005_1.1	1018	NVE24610	60	16.6667
NVE5454	72	NVE1038	138	16.6667
NVE5454	72	NVE22972	977	16.6667
NVE5454	72	Nvec_QWamide	325	16.6667
NVE5454	72	NVE16210	117	16.6667
NVE5454	72	NVEC200_005515_1.1	175	16.6667
NVE5454	72	NVE12918|HADO01001257.1	77	16.6667
NVE5454	72	NVE18122	300	16.6667
NVE5454	72	NVEC200_013206_1.1	240	16.6667
NVE5454	72	NVE15069	213	16.6667
NVE5454	72	Nvec_HIRamide	240	16.6667
NVE5454	72	NVEC200_014828_1.1	233	16.6667
NVE5454	72	NVE24230	172	16.6667
NVE5454	72	NVE15666	234	16.6667
NVE5454	72	NVE3482	378	16.6667
NVE5454	72	NVE24721	92	16.6667
NVE5454	72	NVE4012|Nvec_XP_032233649.1	269	16.6667
NVE5454	72	NVEC200_004699_1.1	669	16.6667
NVE5454	72	NVEC200_010517_1.1	282	16.6667
NVEC200_008914_1.1	382	NVE1038	138	16.6667
NVEC200_008914_1.1	382	NVE24610	60	16.6667
NVE7965	380	NVE24610	60	16.6667
NVE7357	206	NVE3755	78	16.6667
NVE7357	206	NVE24610	60	16.6667
NVE23858	679	NVE24610	60	16.6667
NVEC200_002800_1.1|Nvec_VRHamide	121	NVE3755	78	16.6667
NVE9233	114	NVEC200_006106_1.1	615	16.6667
NVE9233	114	NVE18847	490	16.6667
NVE9233	114	NVE24610	60	16.6667
NVEC200_003938_1.1	1775	NVE5329	138	16.6667
NVE1038	138	NVE3755	78	16.6667
NVE1038	138	NVE18847	490	16.6667
NVE1038	138	NVE24610	60	16.6667
HADP01211238.1	71	NVE24610	60	16.6667
NVE3755	78	NVE15529	211	16.6667
NVE3755	78	NVEC200_012480_1.1	391	16.6667
NVE3755	78	NVEC200_004815_1.1	248	16.6667
NVE3755	78	NVE21750	248	16.6667
NVE3755	78	NVEC200_009895_1.1	294	16.6667
NVE3755	78	NVEC200_013206_1.1	240	16.6667
NVE3755	78	NVE15069	213	16.6667
NVE3755	78	Nvec_HIRamide	240	16.6667
NVE3755	78	NVE9107	767	16.6667
NVE3755	78	NVE9956|HADO01002733.1	79	16.6667
NVE3755	78	NVE6636	158	16.6667
NVE3755	78	NVE26068	123	16.6667
NVE3755	78	NVE6394	377	16.6667
NVE3755	78	NVE4012|Nvec_XP_032233649.1	269	16.6667
NVE3755	78	NVEC200_004699_1.1	669	16.6667
NVE3755	78	NVEC200_010517_1.1	282	16.6667
Nvec_RPamide_EDO37503.p1	85	NVE24610	60	16.6667
NVEC200_012480_1.1	391	NVE24610	60	16.6667
NVEC200_012480_1.1	391	NVE21004	60	16.6667
NVE22972	977	NVE24610	60	16.6667
NVE21167	263	NVE24610	60	16.6667
NVEC200_004815_1.1	248	NVE5329	138	16.6667
NVEC200_004815_1.1	248	NVE21004	60	16.6667
NVE21750	248	NVE5329	138	16.6667
NVE21750	248	NVE21004	60	16.6667
NVE9858	296	NVE24610	60	16.6667
NVE13213	186	NVE24610	60	16.6667
NVE13213	186	NVEC200_012385_1.1	434	16.6667
NVE7509	563	NVE24610	60	16.6667
NVE18122	300	NVE24610	60	16.6667
NVE339	219	NVE21004	60	16.6667
NVEC200_005559_1.1	173	NVE21004	60	16.6667
NVE9107	767	NVE21004	60	16.6667
NVE7771	130	NVE21004	60	16.6667
NVE2880	103	NVE24610	60	16.6667
NVE2880	103	NVE21004	60	16.6667
NVE22351	73	NVE21004	60	16.6667
NVE2470	103	NVE21004	60	16.6667
NVE22353	122	NVE21004	60	16.6667
NVE24857	103	NVE21004	60	16.6667
NVE24230	172	NVE21004	60	16.6667
NVEC200_014058_1.1	178	NVE24610	60	16.6667
NVE7520	176	NVE24610	60	16.6667
NVE26068	123	NVE24610	60	16.6667
NVE24610	60	NVE15505	345	16.6667
NVE24610	60	NVE24582	471	16.6667
NVE24610	60	NVE4012|Nvec_XP_032233649.1	269	16.6667
NVE24610	60	NVEC200_000296_1.1	419	16.6667
NVE24610	60	NVEC200_000672_1.1	838	16.6667
NVE24610	60	NVEC200_005035_1.1	301	16.6667
NVE21004	60	NVE15505	345	16.6667
NVE21004	60	NVE24582	471	16.6667
NVE21004	60	NVE15677	137	16.6667
NVEC200_005515_1.1	175	NVEC200_012385_1.1	434	16.5714
NVEC200_004869_1.1|Nvec_PRGamide	544	NVE9858	296	16.5541
NVEC200_012734_1.1	133	NVE9107	767	16.5414
NVEC200_005480_1.1	2251	NVEC200_002800_1.1|Nvec_VRHamide	121	16.5289
NVEC200_002800_1.1|Nvec_VRHamide	121	NVEC200_003938_1.1	1775	16.5289
NVEC200_002800_1.1|Nvec_VRHamide	121	NVE15340	1820	16.5289
NVEC200_002800_1.1|Nvec_VRHamide	121	NVE22972	977	16.5289
NVEC200_002800_1.1|Nvec_VRHamide	121	NVEC200_005266_1.1	1464	16.5289
NVEC200_002800_1.1|Nvec_VRHamide	121	NVE24290	5017	16.5289
NVEC200_002800_1.1|Nvec_VRHamide	121	NVE4012|Nvec_XP_032233649.1	269	16.5289
NVE5882	1075	NVE2880	103	16.5049
NVE5882	1075	NVE2470	103	16.5049
NVE5882	1075	NVE24857	103	16.5049
NVE2870	376	NVE2880	103	16.5049
NVEC200_009244_1.1	621	NVE24857	103	16.5049
NVEC200_002782_1.1	226	NVE2880	103	16.5049
NVEC200_005480_1.1	2251	NVE2880	103	16.5049
NVEC200_005480_1.1	2251	NVE2470	103	16.5049
NVE16146	581	NVE2880	103	16.5049
NVE19082	767	NVE2880	103	16.5049
NVEC200_000005_1.1	1018	NVE2880	103	16.5049
NVEC200_000005_1.1	1018	NVE2470	103	16.5049
NVEC200_000005_1.1	1018	NVE24857	103	16.5049
NVEC200_008914_1.1	382	NVE2880	103	16.5049
NVEC200_008914_1.1	382	NVE2470	103	16.5049
NVE7965	380	NVE2880	103	16.5049
NVE7965	380	NVE2470	103	16.5049
NVE7357	206	NVE23858	679	16.5049
NVE23858	679	NVE2470	103	16.5049
NVE23858	679	NVE24857	103	16.5049
NVEC200_003938_1.1	1775	NVE24857	103	16.5049
NVE15340	1820	NVE2470	103	16.5049
NVEC200_014051_1.1	592	NVE2470	103	16.5049
NVEC200_014051_1.1	592	NVE24857	103	16.5049
NVE22972	977	NVE24857	103	16.5049
NVE7509	563	NVE2880	103	16.5049
NVEC200_006106_1.1	615	NVE24857	103	16.5049
NVE24290	5017	NVE24857	103	16.5049
NVEC200_004380_1.1	201	NVE2470	103	16.5049
NVEC200_004380_1.1	201	NVE24857	103	16.5049
NVE2470	103	NVEC200_000672_1.1	838	16.5049
NVE24857	103	NVEC200_000672_1.1	838	16.5049
NVE21426	182	NVE15666	234	16.4835
NVEC200_004869_1.1|Nvec_PRGamide	544	Nvec_RPamide_EDO37503.p1	85	16.4706
NVE19082	767	Nvec_RPamide_EDO37503.p1	85	16.4706
NVE8677	136	Nvec_RPamide_EDO37503.p1	85	16.4706
NVE23858	679	Nvec_RPamide_EDO37503.p1	85	16.4706
NVE8232	104	Nvec_RPamide_EDO37503.p1	85	16.4706
Nvec_RPamide_EDO37503.p1	85	NVEC200_009895_1.1	294	16.4706
Nvec_RPamide_EDO37503.p1	85	NVEC200_013206_1.1	240	16.4706
Nvec_RPamide_EDO37503.p1	85	NVE15069	213	16.4706
Nvec_RPamide_EDO37503.p1	85	Nvec_HIRamide	240	16.4706
Nvec_RPamide_EDO37503.p1	85	NVEC200_014828_1.1	233	16.4706
Nvec_RPamide_EDO37503.p1	85	NVE3482	378	16.4706
Nvec_RPamide_EDO37503.p1	85	NVE15677	137	16.4706
Nvec_RPamide_EDO37503.p1	85	NVEC200_013996_1.1	313	16.4706
Nvec_RPamide_EDO37503.p1	85	NVEC200_000672_1.1	838	16.4706
NVEC200_004869_1.1|Nvec_PRGamide	544	NVEC200_000296_1.1	419	16.4678
Nvec_GLWamide	347	NVE6636	158	16.4557
NVEC200_012734_1.1	133	NVE9956|HADO01002733.1	79	16.4557
NVE19082	767	NVE9956|HADO01002733.1	79	16.4557
NVEC200_000005_1.1	1018	NVE9956|HADO01002733.1	79	16.4557
NVEC200_008914_1.1	382	NVE9956|HADO01002733.1	79	16.4557
NVE7965	380	NVE9956|HADO01002733.1	79	16.4557
NVE23858	679	NVE9956|HADO01002733.1	79	16.4557
NVE9233	114	NVE9956|HADO01002733.1	79	16.4557
NVE15529	211	NVE9956|HADO01002733.1	79	16.4557
NVEC200_012480_1.1	391	NVE9956|HADO01002733.1	79	16.4557
NVEC200_012480_1.1	391	NVE6636	158	16.4557
NVEC200_005266_1.1	1464	NVE9956|HADO01002733.1	79	16.4557
NVEC200_004815_1.1	248	NVE9956|HADO01002733.1	79	16.4557
NVE24290	5017	NVE9956|HADO01002733.1	79	16.4557
NVEC200_004847_1.1	240	NVE9956|HADO01002733.1	79	16.4557
NVEC200_005559_1.1	173	NVE9956|HADO01002733.1	79	16.4557
NVEC200_013206_1.1	240	NVE9956|HADO01002733.1	79	16.4557
NVE15069	213	NVE9956|HADO01002733.1	79	16.4557
Nvec_HIRamide	240	NVE9956|HADO01002733.1	79	16.4557
NVE18847	490	NVE9956|HADO01002733.1	79	16.4557
NVEC200_014828_1.1	233	NVE9956|HADO01002733.1	79	16.4557
NVE9107	767	NVE9956|HADO01002733.1	79	16.4557
NVE9107	767	NVE6636	158	16.4557
NVE9956|HADO01002733.1	79	NVE15666	234	16.4557
NVE9956|HADO01002733.1	79	NVE24582	471	16.4557
NVE9956|HADO01002733.1	79	NVEC200_012385_1.1	434	16.4557
NVE9956|HADO01002733.1	79	NVEC200_004699_1.1	669	16.4557
NVE9956|HADO01002733.1	79	NVEC200_013996_1.1	313	16.4557
NVE9956|HADO01002733.1	79	NVEC200_000672_1.1	838	16.4557
NVE5882	1075	NVE22351	73	16.4384
NVEC200_014617_1.1	524	NVE22000	73	16.4384
NVEC200_009244_1.1	621	NVE22351	73	16.4384
Nvec_GLWamide	347	NVE22000	73	16.4384
NVEC200_002782_1.1	226	NVE22351	73	16.4384
NVEC200_005480_1.1	2251	NVE22000	73	16.4384
NVE226	410	NVE22000	73	16.4384
NVE4068	107	NVE22000	73	16.4384
NVE1473	202	NVE22000	73	16.4384
NVEC200_008914_1.1	382	NVE22351	73	16.4384
NVE7965	380	NVE22351	73	16.4384
NVE7357	206	NVE22351	73	16.4384
NVE7357	206	NVE22000	73	16.4384
NVEC200_002800_1.1|Nvec_VRHamide	121	NVE22000	73	16.4384
NVE1038	138	NVE22351	73	16.4384
NVEC200_012480_1.1	391	NVE22351	73	16.4384
NVE22972	977	NVE22000	73	16.4384
NVEC200_005266_1.1	1464	NVE22000	73	16.4384
Nvec_QWamide	325	NVE22000	73	16.4384
NVEC200_004815_1.1	248	NVE22351	73	16.4384
NVE21750	248	NVE22351	73	16.4384
NVE9858	296	NVE22000	73	16.4384
NVE897	234	NVE22000	73	16.4384
NVEC200_009895_1.1	294	NVE22000	73	16.4384
NVEC200_005559_1.1	173	NVE22351	73	16.4384
NVEC200_013206_1.1	240	NVE22351	73	16.4384
NVE15069	213	NVE22351	73	16.4384
Nvec_HIRamide	240	NVE22351	73	16.4384
NVEC200_014828_1.1	233	NVE22000	73	16.4384
NVE22351	73	NVEC200_014058_1.1	178	16.4384
NVE22351	73	NVE2974	221	16.4384
NVE22351	73	NVE6636	158	16.4384
NVE22351	73	NVEC200_004699_1.1	669	16.4384
NVEC200_014058_1.1	178	NVE22000	73	16.4384
NVE7520	176	NVE22000	73	16.4384
NVE2974	221	NVE22000	73	16.4384
NVE6636	158	NVE22000	73	16.4384
NVE22000	73	NVE6394	377	16.4384
NVE22000	73	NVEC200_004699_1.1	669	16.4384
NVE22000	73	NVEC200_000296_1.1	419	16.4384
NVE22000	73	NVEC200_010517_1.1	282	16.4384
NVE22000	73	NVEC200_005035_1.1	301	16.4384
Nvec_GLWamide	347	NVE15069	213	16.4319
NVE5882	1075	Nvec_comp12848_Phoenixin	67	16.4179
NVE2870	376	Nvec_comp12848_Phoenixin	67	16.4179
NVE23327	238	Nvec_comp12848_Phoenixin	67	16.4179
NVE11072	218	Nvec_comp12848_Phoenixin	67	16.4179
NVEC200_005480_1.1	2251	Nvec_comp12848_Phoenixin	67	16.4179
NVE16146	581	Nvec_comp12848_Phoenixin	67	16.4179
NVE19082	767	Nvec_comp12848_Phoenixin	67	16.4179
NVE15340	1820	Nvec_comp12848_Phoenixin	67	16.4179
NVE22972	977	Nvec_comp12848_Phoenixin	67	16.4179
NVE13213	186	Nvec_comp12848_Phoenixin	67	16.4179
NVEC200_009895_1.1	294	Nvec_comp12848_Phoenixin	67	16.4179
NVEC200_005559_1.1	173	Nvec_comp12848_Phoenixin	67	16.4179
NVE9107	767	Nvec_comp12848_Phoenixin	67	16.4179
NVE24230	172	Nvec_comp12848_Phoenixin	67	16.4179
Nvec_comp12848_Phoenixin	67	NVE26068	123	16.4179
Nvec_comp12848_Phoenixin	67	NVE16920	159	16.4179
Nvec_comp12848_Phoenixin	67	NVE6394	377	16.4179
Nvec_comp12848_Phoenixin	67	NVEC200_008652_1.1	757	16.4179
Nvec_comp12848_Phoenixin	67	NVEC200_000672_1.1	838	16.4179
Nvec_comp12848_Phoenixin	67	NVEC200_004626_1.1	130	16.4179
NVEC200_004869_1.1|Nvec_PRGamide	544	NVE4012|Nvec_XP_032233649.1	269	16.3569
NVE4601	238	NVE16920	159	16.3522
Nvec_QWamide	325	NVE16920	159	16.3522
[truncated: 8,012 more rows]
