# Supplementary material for: Large-scale deorphanization of Nematostella vectensis neuropeptide G protein-coupled receptors supports the independent expansion of bilaterian and cnidarian peptidergic systems
Source: eLife. 2024 May 10;12:RP90674. doi: 10.7554/eLife.90674 (PMC11087051; doi:10.7554/eLife.90674)
Supplement: Supplementary file 3. — The file contains the peptide mixes that were used in the initial peptide mix-GPCR screening (with additional information about the peptides and dilution of stock solutions). [file elife-90674-supp3.xlsx]

## Sheet: Peptide_mixes
Mix	iso-electric point (pH)	net charge at pH 7	NP name	Sequence		solvent Vol		stock molarity		stock conz		max solve water (DMSO)		amount		purity		pure amount		mol mass		amount [mol]
1	0	-1.1	GLWG	pyrQCPPGLWGC	932.023	µl 50%DMSO	2	mM	2.14587	mg/ml	10 (10)	mg/ml	2	mg	87.9	%	1.758	mg	943.11	g/mol	1.86405	umol
	0	-1	GLWGcc	pyrQC(dis)PPGLWGC(dis)	1020.09	µl 50%DMSO	2	mM	1.9606	mg/ml	2 (10)	mg/ml	2	mg	96	%	1.92	mg	941.09	g/mol	2.04019	umol
	4.17	-1	RFa2	MPEQDANPQTRFDamide	630.629	µl 50%DMSO	2	mM	3.17143	mg/ml	5 (10)	mg/ml	2	mg	97.6	%	1.952	mg	1547.66	g/mol	1.26126	umol
	5.17	-0.9	HIRa1	pyrQPPYLDLGEPSFFHIRamide	517.351	µl 50%DMSO	2	mM	3.86585	mg/ml	10 (10)	mg/ml	2	mg	98.2	%	1.964	mg	1898.13	g/mol	1.0347	umol
			PNX12	QPGNMKVWSDPF	604.733	µl 50%DMSO	2	mM	3.30725	mg/ml	0 (5)	mg/ml	2	mg	85	%	1.7	mg	1405.58	g/mol	1.20947	umol
			PNX14	EIQPGNMKVWSDPF	544.342	µl 50%DMSO	2	mM	3.67416	mg/ml	5 (10)	mg/ml	2	mg	89.7	%	1.794	mg	1647.86	g/mol	1.08868	umol
			PNX20	KGIKQEEIQPGNMKVWSDPF	392.853	µl 50%DMSO	2	mM	5.09096	mg/ml	5 (10)	mg/ml	2	mg	91.6	%	1.832	mg	2331.66	g/mol	0.785706	umol
2	6.9	0	RHa5	pyrQYLDPRPamide	1082.8	µl 50%DMSO	2	mM	1.84707	mg/ml	10 (15)	mg/ml	2	mg	94.2	%	1.884	mg	869.97	g/mol	2.16559	umol
	7	0	GLWa1	pyrQAGAPGLWamide	1151.28	µl 50%DMSO	2	mM	1.7372	mg/ml	5 (10)	mg/ml	2	mg	89.9	%	1.798	mg	780.87	g/mol	2.30256	umol
	7	0	GLWa2	pyrQAGPPGLWamide	1116.61	µl 50%DMSO	2	mM	1.79114	mg/ml	10 (10)	mg/ml	2	mg	90.1	%	1.802	mg	806.91	g/mol	2.23321	umol
	7.92	0.1	HIRa3	pyrQPPYLDLTPAYFHIRamide	530.04	µl 50%DMSO	2	mM	3.7733	mg/ml	5 (10)	mg/ml	2	mg	96.1	%	1.922	mg	1813.07	g/mol	1.06008	umol
	8.07	0.1	NRFa	pyrQPYFHTDNSPNRFamide	602.609	µl 50%DMSO	2	mM	3.3189	mg/ml	5 (5)	mg/ml	2	mg	96.7	%	1.934	mg	1604.69	g/mol	1.20522	umol
	8.07	0.1	HIRa4	pyrQPPLDLGPAYFHIRamide	605.291	µl 50%DMSO	2	mM	3.3042	mg/ml	5 (10)	mg/ml	2	mg	97.2	%	1.944	mg	1605.84	g/mol	1.21058	umol
	8.14	1	GLWL	pyrQNGHCPPGLWLCKANTRL	481.593	µl 50%DMSO	2	mM	4.15289	mg/ml	5 (10)	mg/ml	2	mg	95.9	%	1.918	mg	1991.31	g/mol	0.963185	umol
3	9.37	1.1	HIRa2	YPPFLELGQPSYFHIRamide	505.794	µl 50%DMSO	2	mM	3.95418	mg/ml	5 (10)	mg/ml	2	mg	99.3	%	1.986	mg	1963.25	g/mol	1.01159	umol
	9.41	1.1	HIRa5	NPPIDLGPAYFHIRamide	571.215	µl 50%DMSO	2	mM	3.50131	mg/ml	5 (10)	mg/ml	2	mg	91.9	%	1.838	mg	1608.85	g/mol	1.14243	umol
	9.46	1	RHa4	GYYRDNIQETRQYLDPRPamide	426.544	µl 50%DMSO	2	mM	4.68885	mg/ml	5 (10)	mg/ml	2	mg	97.4	%	1.948	mg	2283.47	g/mol	0.853088	umol
	10.6	1.9	LRPa1	SPWSCSLRPamide	925.145	µl 50%DMSO	2	mM	2.16182	mg/ml	10 (10)	mg/ml	2	mg	95.4	%	1.908	mg	1031.19	g/mol	1.85029	umol
	11.12	2	LRPa2	SPWSYSLRPamide	905.4	ul H20	2	mM	2.20897	mg/ml	10 (10)	mg/ml	2	mg	98.8	%	1.976	mg	1091.23	g/mol	1.8108	umol
	11.12	2	FYRVa	FYRVamide	1662.95	µl 50%DMSO	2	mM	1.20268	mg/ml	2 (10)	mg/ml	2	mg	96.9	%	1.938	mg	582.7	g/mol	3.3259	umol
	11.17	2	RHa3	GPPPIYLPVRPamide	812.806	µl 50%DMSO	2	mM	2.46061	mg/ml	10 (10)	mg/ml	2	mg	97.9	%	1.958	mg	1204.47	g/mol	1.62561	umol
	11.38	1	RPa1	pyrQDAFLPKPRPamide	856.269	µl 50%DMSO	2	mM	2.33572	mg/ml	10 (10)	mg/ml	2	mg	98.5	%	1.97	mg	1150.34	g/mol	1.71254	umol
4	11.38	1.1	GLWLcc	pyrQNGHC(dis)PPGLWLC(dis)KANTRL	465.493	µl 50%DMSO	2	mM	4.29652	mg/ml	5 (5)	mg/ml	2	mg	92.6	%	1.852	mg	1989.29	g/mol	0.930985	umol
	11.8	1	RFa1	pyrQGRFGREDQGRFamide	608.562	µl 50%DMSO	2	mM	3.28644	mg/ml	5 (10)	mg/ml	2	mg	87.3	%	1.746	mg	1434.53	g/mol	1.21712	umol
	11.8	2	PRGa2	GPRGGREVNLEGPRGamide	603.988	µl 50%DMSO	2	mM	3.31132	mg/ml	5 (5)	mg/ml	2	mg	93.6	%	1.872	mg	1549.7	g/mol	1.20798	umol
	11.82	3	PRGa	GPRGamide	2238.84	µl 50%DMSO	2	mM	0.848653	mg/ml	10 (10)	mg/ml	1.9	mg	90.6	%	1.7214	mg	384.44	g/mol	4.47768	umol
	11.82	3	PRGa4	GPRGGRSYDGPRGamide	691.511	µl 50%DMSO	2	mM	2.89222	mg/ml	5 (10)	mg/ml	2	mg	92	%	1.84	mg	1330.42	g/mol	1.38302	umol
	12.4	3	PRGa1	APRGGRSLLDLLAAPRGamide	550.317	µl 50%DMSO	2	mM	3.63427	mg/ml	10 (10)	mg/ml	2	mg	94.6	%	1.892	mg	1719.01	g/mol	1.10063	umol
	12.4	3	PRGa3	GPRGGRATEFGPRGamide	654.381	µl 50%DMSO	2	mM	3.05632	mg/ml	10 (10)	mg/ml	2	mg	92.5	%	1.85	mg	1413.55	g/mol	1.30876	umol
	12.4	3	PRGa5	APRGGRDAPRGamide	813.015	µl 50%DMSO	2	mM	2.45998	mg/ml	10 (10)	mg/ml	2	mg	90.1	%	1.802	mg	1108.22	g/mol	1.62603	umol
5	14	1	RFa0	pyrQITRFamide	1502.11	µl 50%DMSO	2	mM	1.33146	mg/ml	5 (5)	mg/ml	2	mg	97	%	1.94	mg	645.76	g/mol	3.00421	umol
	14	2	FRPa1	WPPRPamide	1498.2	µl 50%DMSO	2	mM	1.33493	mg/ml	10 (10)	mg/ml	2	mg	97.5	%	1.95	mg	650.78	g/mol	2.9964	umol
	14	1	FRPa2	pyrQGLMFRPamide	1154.2	µl 50%DMSO	2	mM	1.7328	mg/ml	5 (10)	mg/ml	2	mg	95.8	%	1.916	mg	830.01	g/mol	2.30841	umol
	14	1	FRPa3	pyrQLIFRPamide	1310.07	µl 50%DMSO	2	mM	1.52663	mg/ml	5 (10)	mg/ml	2	mg	98.9	%	1.978	mg	754.92	g/mol	2.62015	umol
	14	1	FRPa4	pyrQLFRPamide	1402.37	µl 50%DMSO	2	mM	1.42616	mg/ml	10 (10)	mg/ml	2	mg	90	%	1.8	mg	641.77	g/mol	2.80474	umol
	14	2.1	RPa2	FPPGFHRPamide	913.85	µl 50%DMSO	2	mM	2.18854	mg/ml	5 (10)	mg/ml	2	mg	87.1	%	1.742	mg	953.11	g/mol	1.8277	umol
6	14	2	QWa1	IPPQGFRFSQWamide	724.904	µl 50%DMSO	2	mM	2.75899	mg/ml	0 (10)	mg/ml	2	mg	98.7	%	1.974	mg	1361.56	g/mol	1.44981	umol
	14	2	QWa2	IPPQGLRFNQWamide	710.188	µl 50%DMSO	2	mM	2.81615	mg/ml	5 (10)	mg/ml	2	mg	96.2	%	1.924	mg	1354.57	g/mol	1.42038	umol
	14	1	GLWa3	GPPGLWamide	1538.26	µl 50%DMSO	2	mM	1.30017	mg/ml	5 (10)	mg/ml	2	mg	96.1	%	1.922	mg	624.73	g/mol	3.07653	umol
	14	1	GLWa4	APGLWamide	1674.51	µl 50%DMSO	2	mM	1.19438	mg/ml	10 (10)	mg/ml	2	mg	90.7	%	1.814	mg	541.65	g/mol	3.34903	umol
	14	2	GLWa5	SPKPPGLWamide	1096.53	µl 50%DMSO	2	mM	1.82394	mg/ml	10 (10)	mg/ml	2	mg	96.5	%	1.93	mg	880.05	g/mol	2.19306	umol
	14	1	QGRFa	pyrQGRFamide	1897.86	µl 50%DMSO	2	mM	1.00113	mg/ml	5 (10)	mg/ml	1.9	mg	97.6	%	1.8544	mg	488.55	g/mol	3.79572	umol
7	14	2	FFKAa	FFKAamide	1862.41	µl 50%DMSO	2	mM	1.07388	mg/ml	10 (10)	mg/ml	2	mg	95.1	%	1.902	mg	510.63	g/mol	3.72481	umol
	14	2	FLRNa	FLRNamide	1738.34	µl 50%DMSO	2	mM	1.15053	mg/ml	10 (10)	mg/ml	2	mg	95.2	%	1.904	mg	547.65	g/mol	3.47667	umol
	14	1	LRWa1	pyrQGLRWamide	1464.85	µl 50%DMSO	2	mM	1.29706	mg/ml	0 (5)	mg/ml	1.9	mg	98.8	%	1.8772	mg	640.75	g/mol	2.92969	umol
	14	1	LRWa2	pyrQGGLRWamide	1327.03	µl 50%DMSO	2	mM	1.50713	mg/ml	5 (10)	mg/ml	2	mg	92.6	%	1.852	mg	697.8	g/mol	2.65406	umol
	14	2	LRWa3	GPPQGLRWamide	1067.05	µl 50%DMSO	2	mM	1.87433	mg/ml	5 (5)	mg/ml	2	mg	97	%	1.94	mg	909.05	g/mol	2.1341	umol
	14	3.1	RHa1	GPPMIKIPVRHamide	771.167	µl 50%DMSO	2	mM	2.59347	mg/ml	10 (10)	mg/ml	2	mg	95.9	%	1.918	mg	1243.57	g/mol	1.54233	umol
			RHa2	GPPM(ox)IKIPVRHamide	778.837	µl 50%DMSO	2	mM	2.56793	mg/ml	5 (10)	mg/ml	2	mg	98.1	%	1.962	mg	1259.57	g/mol	1.55767	umol
8	0.61	-4	LRE	pyrQLPSVSEVSENDVASLLRE	465.646	µl 50%DMSO	2	mM	4.29511	mg/ml	0 (5)	mg/ml	2	mg	95.7	%	1.914	mg	2055.21	g/mol	0.931292	umol
	0.67	-1	QW2	DSSPPQW	1187.75	µl 50%DMSO	2	mM	1.68386	mg/ml	5 (10)	mg/ml	2	mg	96.9	%	1.938	mg	815.83	g/mol	2.37549	umol
	3.29	0	QW1	TPPQW	1564.47	µl 50%DMSO	2	mM	1.27839	mg/ml	2 (10)	mg/ml	2	mg	98.2	%	1.964	mg	627.69	g/mol	3.12893	umol
	3.36	-5	EFV	pyrQETDGESLKKAEEEFV	489.599	µl 50%DMSO	2	mM	4.08498	mg/ml	5 (10)	mg/ml	2	mg	89.2	%	1.784	mg	1821.9	g/mol	0.979198	umol
	4.15	-1	WFSa	APPGNGEGEAGFIPWFSamide	528.331	µl 50%DMSO	2	mM	3.78551	mg/ml	0 (2)	mg/ml	2	mg	91.5	%	1.83	mg	1731.87	g/mol	1.05666	umol
	6.38	0	QW3	SPPQWKLDSSPPQW	562.678	µl 50%DMSO	2	mM	3.55443	mg/ml	5 (10)	mg/ml	2	mg	93	%	1.86	mg	1652.81	g/mol	1.12536	umol
	7.06	0	GWA2	pyrQAKLNKGWESANYDKGWA	467.009	µl 50%DMSO	2	mM	4.28257	mg/ml	2 (0)	mg/ml	2	mg	95.7	%	1.914	mg	2049.21	g/mol	0.934018	umol
	8.13	0.9	Am_CCa	CPPGLWCamide	1193.84	µl 50%DMSO	2	mM	1.67526	mg/ml	5 (10)	mg/ml	2	mg	92.4	%	1.848	mg	773.97	g/mol	2.38769	umol
	8.35	0.1	GWA1	pyrQAMQWGHKGWA	701.007	µl 50%DMSO	2	mM	2.85304	mg/ml	0 (10)	mg/ml	2	mg	89.9	%	1.798	mg	1282.44	g/mol	1.40201	umol
9	9.57	1	NTVa	YPPLNTVamide	1188.38	µl 50%DMSO	2	mM	1.68296	mg/ml	5 (10)	mg/ml	2	mg	95.3	%	1.906	mg	801.93	g/mol	2.37677	umol
	14	0.1	HLSa	pyrQPPLSHLSamide	1138.41	µl 50%DMSO	2	mM	1.75683	mg/ml	0 (5)	mg/ml	2	mg	97.9	%	1.958	mg	859.97	g/mol	2.27682	umol
	14	1	SNIa	TPPSNIamide	1554.15	µl 50%DMSO	2	mM	1.28688	mg/ml	2 (5)	mg/ml	2	mg	97.4	%	1.948	mg	626.71	g/mol	3.1083	umol
	14	1	pIPIa	pyrQPPFRIPIamide	1027.23	µl 50%DMSO	2	mM	1.94697	mg/ml	0 (10)	mg/ml	2	mg	97.5	%	1.95	mg	949.15	g/mol	2.05447	umol
	14	2	IPIa	NPPQPPFRIPIamide	695.948	µl 50%DMSO	2	mM	2.87378	mg/ml	5 (10)	mg/ml	2	mg	88.7	%	1.774	mg	1274.52	g/mol	1.3919	umol
	14	4.1	IPFa	RSNRVVIHTGANPTMAPLRIPFamide	348.197	µl 50%DMSO	2	mM	5.74387	mg/ml	5 (10)	mg/ml	2	mg	85.2	%	1.704	mg	2446.89	g/mol	0.696394	umol
	14	2	QIa	LPPRFGGQIamide	868.619	µl 50%DMSO	2	mM	2.30251	mg/ml	5 (10)	mg/ml	2	mg	85.4	%	1.708	mg	983.17	g/mol	1.73724	umol
	14	0.1	PFHa	pyrQMPNMVPFHamide	822.315	µl 50%DMSO	2	mM	2.43216	mg/ml	0 (10)	mg/ml	2	mg	89	%	1.78	mg	1082.31	g/mol	1.64463	umol
