# Supplementary material for: Large-scale deorphanization of Nematostella vectensis neuropeptide G protein-coupled receptors supports the independent expansion of bilaterian and cnidarian peptidergic systems
Source: eLife. 2024 May 10;12:RP90674. doi: 10.7554/eLife.90674 (PMC11087051; doi:10.7554/eLife.90674)
Supplement: Supplementary file 4. — The file contains the data from the peptide mix-GPCR screening with the mixes (normalized as well as the original readings) and the readings to resolve those peptide mix-GPCR pairs that showed a positive signal and lead to the identification of the individual peptide-receptor pairs described in this study. [file elife-90674-supp4.xlsx]

## Sheet: All GPCR mixtests normalized
normalized against 10x negative
	GPR1	GPR1	GPR2	GPR2	GPR3	GPR3	GPR4	GPR4	GPR5	GPR5	GPR6	GPR6	GPR7	GPR7	GPR8	GPR8	GPR9	GPR9	GPR10	GPR10	GPR11	GPR11	GPR12	GPR12	GPR13	GPR13	GPR14	GPR14	GPR15	GPR15	GPR16	GPR16	GPR17	GPR17	GPR18	GPR18	GPR19	GPR19	GPR20	GPR20	GPR21	GPR21	GPR22	GPR22	GPR23	GPR23	GPR24	GPR24	GPR25
Mix 1	0.146247	0.137118	0.242493	0.177352	0.0873015	0.195595	0.0976912	0.0827776	0.228608	0.160504	0.178677	0.200109	0.176885	0.140388	0.120749	0.215128	0.18328	0.16241	0.187064	0.142993	0.137916	0.136497	0.114011	0.0998722	0.0946483	0.182225	0.0826793	0.0871495	0.113827	0.128841	0.082154	0.105126	0.121303	0.230476	0.0969674	0.132096	0.161416	0.103975	0.224331	0.139416	0.690499	0.934803	0.10459	0.0985899	0.109078	0.105777	0.210701	0.0915357	0.41498
Mix 2	0.135218	0.146164	0.183963	0.136098	0.0810123	0.0597613	0.123791	0.11755	0.228059	0.0986113	0.135757	0.296301	0.126226	0.115714	0.060372	0.12734	0.157101	0.142977	0.119717	0.0895262	0.062049	0.105693	0.0819562	0.105882	0.0913376	0.172906	0.116312	0.116106	0.132387	0.179799	0.125713	0.108872	0.131755	0.244399	1.01972	0.815719	0.100058	0.106058	0.20834	0.249136	0.998987	1.09882	0.0993713	0.0976415	0.139067	0.182943	0.149999	0.136032	0.587534
Mix 3	0.135324	0.162068	0.219152	0.0927532	0.118805	0.129745	0.126609	0.115072	0.193273	0.115752	0.11821	0.203104	0.0937885	0.131891	0.103228	0.0955381	0.127839	0.105697	0.146342	0.110365	0.0913969	0.069244	0.083394	0.0913863	0.0899461	0.176344	0.0363421	0.0902312	0.129759	0.186507	0.112873	0.0968997	0.105258	0.195823	0.112591	0.0872073	0.156824	0.115977	0.13223	0.1018	0.988998	1.10494	0.0946548	0.0522878	0.107171	0.0983842	0.100228	0.0806722	0.356185
Mix 4	0.145994	0.123464	0.180863	0.141869	0.0745996	0.0745209	0.105614	0.109035	0.0845382	0.078803	0.0752871	0.185658	0.102368	0.0999742	0.0574175	0.163769	0.16353	0.0885537	0.14464	0.107659	0.0827918	0.0866295	0.100882	0.0973267	0.108447	0.191637	0.085455	0.116103	0.0946591	0.133341	0.118598	0.105106	0.116022	0.187694	0.87078	1.19273	0.0841468	0.138148	0.118157	0.117553	0.370728	0.453697	0.1134	0.0939943	0.0844134	0.0713357	0.381258	0.230216	0.15013
Mix 5	0.0791185	0.0625929	0.119664	0.160782	0.163407	0.102995	0.094692	0.0911837	0.0888934	0.139133	0.113079	0.124223	0.187993	0.194445	0.0979829	0.0910571	0.0823197	0.0975072	0.110794	0.120371	0.11569	0.0721044	0.0952514	0.103859	0.100653	0.0793408	0.0998127	0.0806853	0.160354	0.074784	0.198523	0.28464	0.104105	0.132509	0.105074	0.124945	0.257219	0.217911	0.0980867	0.0854789	0.462399	0.523837	0.190839	0.150063	0.113226	0.128146	0.0757344	0.0836632	0.0974078
Mix 6	0.246332	0.233508	0.311786	0.190429	0.147463	0.149603	0.121913	0.20929	0.292847	0.17717	0.136022	0.245668	0.264342	0.178345	0.172167	0.319848	0.230804	0.20237	0.256567	0.164106	0.10693	0.152015	0.140929	0.135807	0.0542919	0.203636	0.103646	0.10859	0.117486	0.139862	0.0991697	0.0898814	0.119526	0.200178	0.103135	0.127535	0.104584	0.104052	0.591346	0.3842	0.116838	0.127984	0.0958395	0.107469	0.121726	0.145474	0.144654	0.101865	0.15002
Mix 7	0.16995	0.148431	0.358437	0.249715	0.0605655	0.130143	0.0767739	0.141686	0.179737	0.0901744	0.146583	0.206642	0.129503	0.141678	0.108891	0.083655	0.150471	0.110333	0.16226	0.0814532	0.0707185	0.08659	0.161411	0.147485	0.165374	0.289641	0.119948	0.13438	0.136636	0.279844	0.138585	0.138028	0.206606	0.401213	0.109492	0.142508	1.71883	1.69591	0.250279	0.286163	0.290117	0.484236	0.162427	0.160632	0.159812	0.202309	0.376659	0.210505	0.170908
Mix 8	0.073978	0.0867271	0.0910367	0.106437	0.0935048	0.0882669	0.0866086	0.0815933	0.110528	0.163016	0.11652	0.103727	0.102639	0.0695588	0.0584337	0.0719663	0.11265	0.10589	0.0989344	0.101222	0.113252	0.0643867	0.042858	0.081477	0.0886594	0.0757467	0.0894953	0.0689173	0.113459	0.0797227	0.122597	0.136278	0.0799671	0.0817799	0.0726848	0.114052	0.0770662	0.0811372	0.0839153	0.076989	0.102298	0.0880463	0.1188	0.107052	0.0838983	0.11953	0.0852862	0.076888	0.0847617
Mix 9	0.0761129	0.103727	0.0854795	0.0918056	0.0946364	0.109425	0.108435	0.105427	0.203304	0.264661	0.109713	0.135612	0.0975276	0.0851789	0.0642904	0.0673394	0.121701	0.109836	0.0993843	0.128499	0.133433	0.0951761	0.0834117	0.059412	0.105341	0.0970094	0.0886224	0.0679606	0.149756	0.0944502	0.103102	0.104958	0.113349	0.108828	0.101793	0.127867	0.0878567	0.0996534	0.0777394	0.077887	0.0910768	0.0766935	0.10677	0.0884952	0.101996	0.113158	0.0774355	0.0773437	0.0957481
10xCtrl	1	1	1	1	1	1	1	1	1	1	1	1	1	1	1	1	1	1	1	1	1	1	1	1	1	1	1	1	1	1	1	1	1	1	1	1	1	1	1	1	1	1	1	1	1	1	1	1	1
max set to 1
	GPR1	GPR1	GPR2	GPR2	GPR3	GPR3	GPR4	GPR4	GPR5	GPR5	GPR6	GPR6	GPR7	GPR7	GPR8	GPR8	GPR9	GPR9	GPR10	GPR10	GPR11	GPR11	GPR12	GPR12	GPR13	GPR13	GPR14	GPR14	GPR15	GPR15	GPR16	GPR16	GPR17	GPR17	GPR18	GPR18	GPR19	GPR19	GPR20	GPR20	GPR21	GPR21	GPR22	GPR22	GPR23	GPR23	GPR24	GPR24	GPR25
Mix 1	0.146247	0.137118	0.242493	0.177352	0.0873015	0.195595	0.0976912	0.0827776	0.228608	0.160504	0.178677	0.200109	0.176885	0.140388	0.120749	0.215128	0.18328	0.16241	0.187064	0.142993	0.137916	0.136497	0.114011	0.0998722	0.0946483	0.182225	0.0826793	0.0871495	0.113827	0.128841	0.082154	0.105126	0.121303	0.230476	0.0969674	0.132096	0.161416	0.103975	0.224331	0.139416	0.690499	0.934803	0.10459	0.0985899	0.109078	0.105777	0.210701	0.0915357	0.41498
Mix 2	0.135218	0.146164	0.183963	0.136098	0.0810123	0.0597613	0.123791	0.11755	0.228059	0.0986113	0.135757	0.296301	0.126226	0.115714	0.060372	0.12734	0.157101	0.142977	0.119717	0.0895262	0.062049	0.105693	0.0819562	0.105882	0.0913376	0.172906	0.116312	0.116106	0.132387	0.179799	0.125713	0.108872	0.131755	0.244399	1	0.815719	0.100058	0.106058	0.20834	0.249136	0.998987	1	0.0993713	0.0976415	0.139067	0.182943	0.149999	0.136032	0.587534
Mix 3	0.135324	0.162068	0.219152	0.0927532	0.118805	0.129745	0.126609	0.115072	0.193273	0.115752	0.11821	0.203104	0.0937885	0.131891	0.103228	0.0955381	0.127839	0.105697	0.146342	0.110365	0.0913969	0.069244	0.083394	0.0913863	0.0899461	0.176344	0.0363421	0.0902312	0.129759	0.186507	0.112873	0.0968997	0.105258	0.195823	0.112591	0.0872073	0.156824	0.115977	0.13223	0.1018	0.988998	1	0.0946548	0.0522878	0.107171	0.0983842	0.100228	0.0806722	0.356185
Mix 4	0.145994	0.123464	0.180863	0.141869	0.0745996	0.0745209	0.105614	0.109035	0.0845382	0.078803	0.0752871	0.185658	0.102368	0.0999742	0.0574175	0.163769	0.16353	0.0885537	0.14464	0.107659	0.0827918	0.0866295	0.100882	0.0973267	0.108447	0.191637	0.085455	0.116103	0.0946591	0.133341	0.118598	0.105106	0.116022	0.187694	0.87078	1	0.0841468	0.138148	0.118157	0.117553	0.370728	0.453697	0.1134	0.0939943	0.0844134	0.0713357	0.381258	0.230216	0.15013
Mix 5	0.0791185	0.0625929	0.119664	0.160782	0.163407	0.102995	0.094692	0.0911837	0.0888934	0.139133	0.113079	0.124223	0.187993	0.194445	0.0979829	0.0910571	0.0823197	0.0975072	0.110794	0.120371	0.11569	0.0721044	0.0952514	0.103859	0.100653	0.0793408	0.0998127	0.0806853	0.160354	0.074784	0.198523	0.28464	0.104105	0.132509	0.105074	0.124945	0.257219	0.217911	0.0980867	0.0854789	0.462399	0.523837	0.190839	0.150063	0.113226	0.128146	0.0757344	0.0836632	0.0974078
Mix 6	0.246332	0.233508	0.311786	0.190429	0.147463	0.149603	0.121913	0.20929	0.292847	0.17717	0.136022	0.245668	0.264342	0.178345	0.172167	0.319848	0.230804	0.20237	0.256567	0.164106	0.10693	0.152015	0.140929	0.135807	0.0542919	0.203636	0.103646	0.10859	0.117486	0.139862	0.0991697	0.0898814	0.119526	0.200178	0.103135	0.127535	0.104584	0.104052	0.591346	0.3842	0.116838	0.127984	0.0958395	0.107469	0.121726	0.145474	0.144654	0.101865	0.15002
Mix 7	0.16995	0.148431	0.358437	0.249715	0.0605655	0.130143	0.0767739	0.141686	0.179737	0.0901744	0.146583	0.206642	0.129503	0.141678	0.108891	0.083655	0.150471	0.110333	0.16226	0.0814532	0.0707185	0.08659	0.161411	0.147485	0.165374	0.289641	0.119948	0.13438	0.136636	0.279844	0.138585	0.138028	0.206606	0.401213	0.109492	0.142508	1	1	0.250279	0.286163	0.290117	0.484236	0.162427	0.160632	0.159812	0.202309	0.376659	0.210505	0.170908
Mix 8	0.073978	0.0867271	0.0910367	0.106437	0.0935048	0.0882669	0.0866086	0.0815933	0.110528	0.163016	0.11652	0.103727	0.102639	0.0695588	0.0584337	0.0719663	0.11265	0.10589	0.0989344	0.101222	0.113252	0.0643867	0.042858	0.081477	0.0886594	0.0757467	0.0894953	0.0689173	0.113459	0.0797227	0.122597	0.136278	0.0799671	0.0817799	0.0726848	0.114052	0.0770662	0.0811372	0.0839153	0.076989	0.102298	0.0880463	0.1188	0.107052	0.0838983	0.11953	0.0852862	0.076888	0.0847617
Mix 9	0.0761129	0.103727	0.0854795	0.0918056	0.0946364	0.109425	0.108435	0.105427	0.203304	0.264661	0.109713	0.135612	0.0975276	0.0851789	0.0642904	0.0673394	0.121701	0.109836	0.0993843	0.128499	0.133433	0.0951761	0.0834117	0.059412	0.105341	0.0970094	0.0886224	0.0679606	0.149756	0.0944502	0.103102	0.104958	0.113349	0.108828	0.101793	0.127867	0.0878567	0.0996534	0.0777394	0.077887	0.0910768	0.0766935	0.10677	0.0884952	0.101996	0.113158	0.0774355	0.0773437	0.0957481
Normalization against 10x negativ control, with any activation above that set to 1
[truncated: 277 more columns]

## Sheet: All positive mixes resolved
Mix1
	GPR21	GPR21
GLWG	350.495	247.136
GLWGcc	403.131	388.856
RFa2	455.403	388.949
HIRa1	24338.6	28529
Mix2
	GPR18	GPR18	GPR21	GPR21	GPR29	GPR29
RHa5	352.06	354.119	442.51	389.82	459.166	212.102
GLWa1	193.571	318.611	26069.7	27798.9	388.482	300.261
GLWa2	281.399	530.696	230.452	531.909	353.442	389.159
HIRa3	211.28	265.271	34578.9	40933	37136.3	35430.9
NRFa	193.504	335.762	9276.17	13948.3	282.93	265.558
HIRa4	211.284	212.283	33396	39986	33799.3	34913.3
GLWL	8010.74	9386.73	318.686	336.401	317.803	212.193
Mix3
	GPR21	GPR21	GPR29	GPR29	GPR197	GPR197
HIRa2	23463	22714.9	18801.9	14509.4	1068.5	1377.01
HIRa5	29565.6	26034.1	24766.9	18967.4	1520.51	1787.03
RHa4	318.617	336.02	282.579	352.708	1356.11	1027.33
LRPa1	459.459	265.301	141.201	546.019	903.47	1274.26
LRPa2	176.606	123.899	211.903	211.568	1561.23	1151.34
RHa3	194.283	424.697	353.451	317.474	1088.23	1171.05
RPa1	176.873	212.63	458.923	352.25	1685.14	1376.25
FYRVa	229.818	123.771	246.886	282.163	51135	37452.1
Mix4
	GPR18	GPR18	GPR28	GPR28	GPR32	GPR32	GPR198	GPR198	GPR199	GPR199	GPR200	GPR200	GPR202	GPR202	GPR210	GPR210	GPR211	GPR211	GPR219	GPR219	GPR220	GPR220	GPR221	GPR221	GPR222	GPR222	GPR223	GPR223
GLWLcc	8783.75	8559.47	301.127	424.253	459.27	123.726	2528.28	3009.96	1466.23	1396.43	2223.41	2182.84	1100.15	1136.64	1673.36	1376.67	1057.84	1304.64	1500.64	1007.52	1383.1	1204.47	1342	1541.17	928.296	1816.89	1610.77	1305.46
RFa1	212.453	441.901	690.125	636.248	406.104	353.082	3350.17	4847.41	3654.33	3532.48	4464.77	4640.56	1944.46	1666.05	3288.12	1592.68	2917.83	3027.19	1082.66	1122.66	1623.71	1303.23	1323.12	1723.94	681.281	2165.53	2070.71	1362.45
PRGa2	177.071	141.3	6020.77	6122.63	5125.5	5085.08	42843.7	50104.9	45375.2	42325.2	74197.1	63625.6	7721.41	8420.12	87096.1	43259.7	20193	22380.5	5085.16	1647.88	4348.39	2482.35	5362.39	7624.92	2462.56	5282.42	10410.2	8445.8
PRGa	300.802	265.326	7063.84	7535.34	13114.5	12381.9	65457	54732.4	63955.6	56996.2	109138	130115	20978.3	23065.5	82702.4	48152.3	18871.5	21065	35014.3	17584.2	56718.4	40199	19193	25566.9	22592.8	38674.5	37751.2	29236.5
PRGa4	212.394	212.076	8442.24	6862.81	7406.07	7840.59	67875.2	78067.1	52171	50785.6	144460	117129	19461.4	18851.8	81291.4	55946.7	21542.5	24277.2	4394.23	6835.78	33666.3	18278.6	12825.5	15657.2	11624.1	26579.6	33846.7	22480.6
PRGa1	354.303	247.579	4922.8	5485.18	1626.33	1765.71	22248.5	25920.5	35121	34938.6	7978.46	8496.72	3103.1	2801.83	47049.1	32412.6	15332.2	15826.1	762.615	449.838	586.482	567.168	703.508	429.891	5221.4	899.865	29675.3	16654.1
PRGa3	283.383	88.4684	7435.47	7959.17	11488.8	11688.4	64862.7	78239.9	54385	56288.5	195911	202346	19900.8	22607.1	84444.4	57329.6	21635.9	24093.7	14040.8	7308.1	40587.4	37167.1	12690	21656.5	13311.7	35197.9	39937	23813.6
PRGa5	265.874	353.919	6798.74	8103.32	3818.27	3265.85	55580.6	55221.8	40788.9	44937.6	5776.66	8101.18	5735.73	4154.18	57679.3	57872.1	18352.2	20382.1	502.738	655.715	443.915	482.389	424.409	578.995	29416.5	753.134	33486.3	25798.6
Mix5
	GPR19	GPR19	GPR70	GPR193	GPR193	GPR196	GPR196	GPR248
QITRFa	2088.08	3160.18	759.138	6019.71	9319.62	76282.8	51980.6	1857.92
FRPa1	403.649	212.069	106.005	2115.84	3174.79	3341.36	1854	11770.5
FRPa2	263.197	300.258	176.617	1709.33	3360.56	2311.14	1566.28	39336.2
FRPa3	420.869	441.23	176.435	1769.83	3112.32	5321.09	3400.52	65537.4
FRPa4	386.176	123.42	247.356	1932.46	3380.96	2269.39	1896.82	36004.4
RPa2	280.757	441.632	211.669	2419.67	3030.17	1959.57	2102.64	41115.7
Mix6
	GPR69	GPR70	GPR234	GPR234
QWa1	2542.09	159.564	1316.4	1206.31
QWa2	159.009	1275.65	1617.41	1409.2
GLWa3	318.115	283.511	1297.77	1226.49
GLWa4	282.414	319.069	817.703	1386.92
GLWa5	388.204	230.205	1696.19	1771.44
QGRFa	353.053	2251.65	17620.1	16924.6
Mix7
	GPR19	GPR19	GPR26	GPR26	GPR70	GPR186	GPR187	GPR193	GPR193	GPR196	GPR196	GPR197	GPR197	GPR204	GPR204	GPR213	GPR213	GPR230	GPR230
FFKAa	353.017	247.817	3388.87	2469.71	247.07	1367.29	1262.09	3060.98	2793	1572.05	1872.75	1462.29	1761.29	4423.33	2655.83	2440.87	2203.17	3319.5	4456.45
FLRNa	812.598	920.583	13628.7	11918.1	247.514	1419.28	19899.7	3306.98	2400.05	2686.51	2635.97	42127.1	49356.8	7844.65	5294.55	4663.27	4067.28	95975.1	84074
LRWa1	16076.2	14914	970.652	1322.37	1131.17	1752.51	1104.23	17975	16153.3	2790.34	2779.52	1341.47	1496.66	110065	78121.4	36494.5	31691.6	4738.23	5436.83
LRWa2	10900.3	12427.5	2347.36	1852.61	2508.68	1579.75	1789.97	20114.1	14797.4	4422.1	5311.76	751.549	1396.8	105521	81807.4	38494.8	29153.4	7043.16	7339.81
LRWa3	8125.61	9171.06	458.871	582.186	282.642	1595.3	1333.17	20299.8	17325.2	60428.8	71984.3	650.17	566.694	97261.5	68795.4	32156.4	28053.4	3781.19	4207.39
RHa1	441.372	566.133	405.957	581.28	2049.01	59769	1331.01	11419.9	10819.7	2665.95	3190.71	772.49	748.427	88930.5	2714.64	32422.1	25613.5	3491.29	5186.38
RHa2	476.67	318.078	353.108	370.074	212.159	45324.4	1293.66	4253.17	3434.31	2293.4	1895.28	1117.29	991.666	3812.96	1947.49	21832.3	20137.4	2801.58	4110.92
Mix9
	GPR36	GPR36
NTVa	1981.74	3062.99
HLSa	2576.71	2821.86
SNIa	1992.83	2093.11
pIPIa	2068.33	2421.04
IPIa	1541.86	1846.64
IPFa	1344.25	1632.56
Qia	1635.55	1551.52
PFHa	133383	125651

## Sheet: GPR1-102, Mix1-7
	GPR1	GPR1	GPR2	GPR2	GPR3	GPR3	GPR4	GPR4	GPR5	GPR5	GPR6	GPR6	GPR7	GPR7	GPR8	GPR8	GPR9	GPR9	GPR10	GPR10	GPR11	GPR11	GPR12	GPR12	GPR13	GPR13	GPR14	GPR14	GPR15	GPR15	GPR16	GPR16	GPR17	GPR17	GPR18	GPR18	GPR19	GPR19	GPR20	GPR20	GPR21	GPR21	GPR22	GPR22	GPR23	GPR23	GPR24	GPR24	GPR25
Mix1	4632.48	5288.97	9336.74	9136.45	1954.76	2976.32	1406.8	1065.9	3935.82	4334.36	3788.4	2294.61	5570.55	5640.8	719.526	975.48	4530.84	4853	1756.01	1977.53	1439	1278.85	4210.81	3373.29	2555.94	2908.66	1636.64	1468.48	1524.21	1049.91	2075.91	3003.91	5066.83	5067.49	1121.31	1120.98	1274.5	943.161	2024.3	1290.61	37013.3	39835.7	3235.92	3844.15	2166.49	1988.38	1502.7	806.796	3733.19
Mix2	4283.12	5637.9	7083.16	7011.2	1813.94	909.371	1782.65	1513.66	3926.36	2662.97	2878.4	3397.62	3975.18	4649.41	359.748	577.411	3883.67	4272.31	1123.81	1238.11	647.414	990.242	3026.93	3576.27	2466.54	2759.91	2302.4	1956.4	1772.73	1465.16	3176.58	3110.93	5503.43	5373.6	11791.9	6922.29	790.033	962.055	1880	2306.31	53549.4	46825.1	3074.44	3807.17	2762.11	3438.94	1069.78	1198.99	5285.51
Mix3	4286.48	6251.34	8438.04	4778.27	2660.15	1974.3	1823.23	1481.75	3327.48	3125.84	2506.36	2328.95	2953.64	5299.41	615.121	433.21	3160.28	3158.36	1373.75	1526.31	953.626	648.751	3080.03	3086.67	2428.96	2814.8	719.392	1520.41	1737.55	1519.83	2852.14	2768.84	4396.66	4305.55	1301.98	740.052	1238.25	1052.03	1193.21	942.388	53013.9	47086.1	2928.52	2038.77	2128.6	1849.41	714.821	711.045	3204.27
Mix4	4624.45	4762.29	6963.79	7308.52	1670.35	1133.96	1520.89	1404.01	1455.45	2128.05	1596.28	2128.9	3223.82	4016.98	342.143	742.596	4042.61	2646.09	1357.77	1488.88	863.841	811.637	3725.94	3287.31	2928.57	3058.91	1691.58	1956.35	1267.54	1086.58	2996.81	3003.32	4846.25	4126.84	10069.6	10121.6	664.404	1253.15	1066.21	1088.21	19872.4	19333.9	3508.48	3664.97	1676.6	1340.96	2719.1	2029.12	1350.58
Mix5	3622.33	5232.18	6291.24	5848.79	1483.88	1061.83	759.556	683.524	2730.66	2053.01	2724.62	2775.18	3312.36	4325	792.231	722.251	2847.85	2717.75	925.941	836.524	917.883	864.535	2952.59	3348.02	4306.97	4373.41	3455.62	4423.6	2935.57	1990.43	6172	5558.16	9663.03	9248.85	1698.89	1334.67	9536.53	10586.8	3632.94	2924.37	11477.9	16335.4	5480.14	6303.46	2995.49	3369.01	2345.57	2716.94	5721.65
Mix6	7802.74	9006.98	12004.7	9810.16	3301.82	2276.47	1755.6	2694.97	5041.8	4784.41	2884.01	2817.02	8324.79	7165.93	1025.92	1450.32	5705.68	6047.06	2408.45	2269.52	1115.69	1424.24	5204.99	4587.04	1466.13	3250.43	2051.67	1829.76	1573.2	1139.72	2505.87	2568.3	4992.63	4401.32	1192.64	1082.27	825.769	943.858	5336.15	3556.62	6262.94	5453.93	2965.17	4190.36	2417.7	2734.61	1031.66	897.837	1349.59
Mix7	5383.29	5725.36	13801	12864.3	1356.12	1980.35	1105.58	1824.45	3094.44	2435.13	3107.94	2369.51	4078.38	5692.63	648.865	379.327	3719.77	3296.88	1523.17	1126.47	737.87	811.267	5961.47	4981.45	4465.85	4623.24	2374.38	2264.33	1829.63	2280.42	3501.84	3944.05	8629.96	8821.48	1266.15	1209.34	13571.5	15383.7	2258.45	2649.07	15551.3	20635.3	5025.33	6263.26	3174.16	3802.98	2686.3	1855.39	1537.5
negative Ctrl	3167.57	3857.24	3850.32	5151.6	2239.09	1521.67	1440.05	1287.67	1721.65	2700.47	2120.25	1146.68	3149.25	4018.02	595.886	453.442	2472.09	2988.12	938.721	1382.96	1043.39	936.906	3693.35	3377.61	2700.46	1596.2	1979.5	1685.02	1339.05	814.889	2526.85	2857.43	4177.01	2198.7	1156.38	848.612	789.577	907.105	902.373	925.721	5360.37	4261.4	3093.89	3899.14	1986.18	1879.79	713.192	881.4	899.608
10x negative Ctrl	31675.7	38572.4	38503.2	51516	22390.9	15216.7	14400.5	12876.7	17216.5	27004.7	21202.5	11466.8	31492.5	40180.2	5958.86	4534.42	24720.9	29881.2	9387.21	13829.6	10433.9	9369.06	36933.5	33776.1	27004.6	15962	19795	16850.2	13390.5	8148.89	25268.5	28574.3	41770.1	21987	11563.8	8486.12	7895.77	9071.05	9023.73	9257.21	53603.7	42614	30938.9	38991.4	19861.8	18797.9	7131.92	8814	8996.08
[truncated: 155 more columns]

## Sheet: GPR1-102 Mix5,8,9
	GPR1	GPR1	GPR2	GPR2	GPR3	GPR3	GPR4	GPR4	GPR5	GPR5	GPR6	GPR6	GPR7	GPR7	GPR8	GPR8	GPR9	GPR9	GPR10	GPR10	GPR11	GPR11	GPR12	GPR12	GPR13	GPR13	GPR14	GPR14	GPR15	GPR15	GPR16	GPR16	GPR17	GPR17	GPR18	GPR18	GPR19	GPR19	GPR20	GPR20	GPR21	GPR21	GPR22	GPR22	GPR23	GPR23	GPR24	GPR24	GPR25
Mix 5	1847.86	2481.99	6562.68	7935.7	29314.8	34416.2	65244.8	68978.8	4707.9	4277.35	10209.7	12039.6	6432.23	8951.77	34733.3	30187.4	4311.37	3364.38	12196.2	12298.7	6675.61	5261.95	23440.5	25841.1	28244.9	17506.1	7254.37	6927.9	24159.8	15627.5	14735.9	18645.3	8960.13	9891.95	10498.8	10343.9	55593.4	53933.8	23388.8	18814.9	46888.7	39153.7	11015.9	11096.4	29605.9	25412.1	47544.2	67077.5	13839.1
Mix 8	1727.8	3438.97	4992.69	5253.41	16774.5	29494.7	59675.1	61723.8	5853.67	5011.62	10520.4	10053.1	3511.81	3202.32	20713.8	23858.4	5899.89	3653.61	10890.7	10342.2	6534.91	4698.74	10546.9	20272.3	24879.3	16713.1	6504.5	5917.46	17094.3	16659.5	9100.09	8926.86	6882.65	6104.97	7262.53	9442.06	16656.5	20081.8	20009.6	16946.1	10373.3	6580.95	6857.55	7915.98	21937.5	23703.4	53540.6	61645.4	12042.4
Mix 9	1777.66	4113.06	4687.92	4531.24	16977.5	36564.6	74714.1	79753.6	10767.2	8136.49	9905.87	13143.4	3336.93	3921.43	22789.9	22324.5	6373.89	3789.77	10940.2	13129.2	7699.42	6945.65	20526.8	14782.3	29560.4	21404.6	6441.06	5835.32	22563.1	19737.1	7653	6875.26	9755.76	8124.11	10171	10585.8	18988.7	24664.7	18537	17143.8	9235.47	5732.4	6163.12	6543.78	26669.7	22439.8	48612.2	62010.7	13603.3
negative Ctrl	2335.56	3965.28	5484.26	4935.69	17939.7	33415.3	68902.1	75648.1	5296.12	3074.3	9028.86	9691.88	3421.52	4603.76	35448.3	33152.2	5237.35	3450.4	11008	10217.3	5770.23	7297.68	24609	24881	28061.7	22064.5	7267.98	8586.32	15066.5	20896.8	7422.77	6550.5	8606.85	7465.12	9991.82	8278.72	21613.2	24750.4	23845	22011.1	10140.3	7474.42	5772.35	7394.5	26147.8	19830.6	62777.6	80175.5	14207.4
10x negative Ctrl	23355.6	39652.8	54842.6	49356.9	179397	334153	689021	756481	52961.2	30743	90288.6	96918.8	34215.2	46037.6	354483	331522	52373.5	34504	110080	102173	57702.3	72976.8	246090	248810	280617	220645	72679.8	85863.2	150665	208968	74227.7	65505	86068.5	74651.2	99918.2	82787.2	216132	247504	238450	220111	101403	74744.2	57723.5	73945	261478	198306	627776	801755	142074
[truncated: 155 more columns]

## Sheet: GPR171,192-213
	GPR171	GPR171	GPR192	GPR192	GPR193	GPR193	GPR194	GPR194	GPR195	GPR195	GPR196	GPR196	GPR197	GPR197	GPR198	GPR198	GPR199	GPR199	GPR200	GPR200	GPR201	GPR201	GPR202	GPR202	GPR203	GPR203	GPR204	GPR204	GPR205	GPR205	GPR206	GPR206	GPR207	GPR207	GPR208	GPR208	GPR209	GPR209	GPR210	GPR210	GPR211	GPR211	GPR212	GPR212	GPR213	GPR213
Mix1	3090.49	3462.5	5949.69	5562.16	6261.37	5114.6	13882.4	9262.07	9415.59	6561.6	8852.51	8425.67	11806.5	12369.6	26305.1	46003.6	31520.9	29352.6	33481.5	35833.5	27006.2	31404.8	9524.68	7876.96	10107.2	7217.32	2561.38	4811.59	2988.48	3434.61	10848.6	9222.07	6006.21	7305.13	7148.6	6352.96	2016.09	3990.49	15737	17506.7	7044.79	6268.55	11800.2	7317.27	16870.1	43942.8
Mix2	2274.63	3051.36	7328.31	7020.64	5755.69	7251.06	5649.2	9691.16	4290.19	5145.54	7788.48	6466.84	9048.67	5845.49	31446.2	36830	3359.85	23521.8	27207.6	26650.9	23331	22415.9	4945.6	9663.17	5916.34	7587.5	2346.76	2541.61	2230.45	3820.74	6483.1	9509.98	5531.19	9104.18	6676.13	7685.1	1843.8	1669.09	11986.9	17146.5	9581.44	7196.98	7757.83	3064.59	16622.1	28205.4
Mix3	1769.49	2275.07	6238.63	5987.81	5035.9	5054.47	7193.42	8072.52	7879.6	4718.59	6376.94	6824.11	129317	121627	29130.6	36443.7	20837.7	24826.2	21363	22891.4	24572.6	24689.8	9319.22	9223.17	8113.02	6497.35	1830.11	2334	1303.58	2782.35	9657.32	7390.21	5896.14	8323.93	4306.3	5390.93	1551.23	2968.1	12149.8	15087.8	8286.2	7491	6656.49	4230.97	17233.9	44672.1
Mix4	1626.26	2382.6	6047.28	6550.76	5568.3	4675.15	9932.67	6984.56	7700.93	4171.26	5062.68	7141.08	7663.46	7255.82	93647.4	102817	124080	117323	127848	138398	28036.3	28152.3	85160.4	89863.6	8169.28	5173.45	1478.92	2781.85	1750.05	3831.77	5533.34	8392.97	3598.35	7294.11	6362.88	4700.17	1179.78	2514.54	79244.8	80047.6	21857.3	16054.4	8086.95	5149.46	11816.6	31481.8
Mix5	3737.62	5179.56	5899.62	5022.81	24671.9	19098.9	7500.49	11114.5	7323.71	6994.31	57862.3	64173.9	14587	12143.1	33579.7	54408.3	30196.7	30878.9	40163.1	36317.4	25456.2	26200.7	9429.29	9563.72	8208.85	6079.85	5771.03	9565.73	2401.57	3988.37	10921	9953.57	5975.43	8981.83	6731.27	7391.12	1745.88	2715.29	13890.3	14455.8	5974.16	5432.88	9327.96	5528.62	29574.2	64933.8
Mix6	2236.44	2333.77	6047.69	6746.73	9587.72	11589.2	11034.2	7420.29	5903.79	4119.92	5186.05	5535.2	9050.79	7904.72	33018.1	42526.2	24428.8	21289.8	20535.1	19332.4	19355	20378.8	7362.77	5468.56	7885.38	7982.81	3208.47	3884.41	1836.72	2899.15	10489	8453.54	5070.03	7913.84	5477.12	6309.87	1140.67	1762	14235.4	14801	6623.74	6370.92	40850.4	28369	19217.2	49982.8
Mix7	3743.47	4347.18	5792.03	5906.8	46849.8	37270.3	12570.4	10782.6	9136.91	5857.4	58565.9	65440.6	90401.1	99609.9	32374.1	61178.5	40054.3	32878.6	36616.7	37736.8	21771.4	28416.7	17743.4	15064.8	7026.22	10035.8	67979.7	89423	11415.5	18830.7	11436.7	8218.84	5236.86	10987.1	6456.75	5543.53	1706.13	2403.17	35347	40080.8	5961.82	5225.57	8614.43	6250.61	33140.6	61762.7
Mix8	1819.95	2594.69	7123.35	7143.15	4916.05	4510.65	10761.4	8936.16	10179.9	4322.54	6377.78	5701.59	8433.56	9211.76	25502.5	30640.7	26700.1	24217.7	20168	22510.5	20361.3	24243.4	7901.98	7924.56	7280.11	7513.53	1436.15	2018.43	1144.83	2660.19	10674	7322.76	5364.84	9569.07	6236.77	5171.08	1512.25	2421.87	8766.83	12681.3	2733.32	1686.37	7289.65	4478.86	10080	25053.6
Mix9	2171.59	2850.33	6960.26	6998.07	2617.43	6087.57	12942.7	7532.7	10259.5	5622.29	6161.8	6337.26	10643.2	3593.77	24369.5	35665.5	20455.9	20554.2	20980.9	23731.6	19914.7	22549.3	6185.66	6632.36	6828.19	6246.28	1642.52	2513.32	1779.36	2938.64	7458.39	8505.35	5778.82	9353.86	6455.17	6223.1	1990.8	2996.27	12016	13661.4	3114.79	1857.26	6115.32	4893.38	10485.4	20144.1
negative Control	1229.7	3114.89	7288.31	6692.85	5575.63	5385.32	6753.99	4642.4	6559.56	3645.41	3259.89	3932.3	6118.14	5198.4	22602.1	36646.8	17131.3	23125.2	23258	29364.1	25543.8	32116.3	7961.68	9307.15	7558.21	7405.42	1649.72	2763.08	1246.55	2398.3	9142.55	7491.15	4052.31	9739.16	6491.59	6415.73	2074.69	3207	12463.7	83766.3	4546.54	2716.27	10132.1	4757.68	15887.7	35229.2
10x negative control	12297	31148.9	72883.1	66928.5	55756.3	53853.2	67539.9	46424	65595.6	36454.1	32598.9	39323	61181.4	51984	226021	366468	171313	231252	232580	293641	255438	321163	79616.8	93071.5	75582.1	74054.2	16497.2	27630.8	12465.5	23983	91425.5	74911.5	40523.1	97391.6	64915.9	64157.3	20746.9	32070	124637	837663	45465.4	27162.7	101321	47576.8	158877	352292
ATP	38289.3	37666	26096.5	23194.3	28756	33946.7	41213.5	44905.1	38701.5	27695.7	54327.8	54483.5	56611.3	56523.2	43285	72319.4	63012.5	51364	84348.7	80110.5	30491.3	32134	32246.6	36034.3	27123	40904.8	53002.3	67434.8	23160.6	53773.6	48352	34871.6	19903	27142.7	33088.3	29817.4	21739.6	30013.5	52261.1	58233.4	23132.1	6892.67	32684.6	20560.5	25052.4	36954.3

## Sheet: GPR185-191,248
	GPR185	GPR185	GPR186	GPR186	GPR187	GPR187	GPR188	GPR188	GPR189	GPR189	GPR190	GPR190	GPR191	GPR191	GPR248	GPR248
control	1790.4		1902.13		2069.64		1603.92	7213.78	2088.75	14374.3	1940.19	5734.82	3021.27	12604.2	2443.32
mix1	2843.38		2435.75		1524.23		2490.84	4031.2	2379.3	11184.6	2843.9	5697.51	1858.88	8378.25	2807.32
mix2	2392.47		2094.63		1873.84		1538.85	4431.83	2633.43	7763.02	1927.83	5975.61	1520.75	7865.87	11341.1
mix3	2060.22		2857.84		1372.3		1299.43	7011.22	2356.99	9988.82	1539.78	4642.65	1001.83	8305.83	8685.81
mix4	66004.3		1457.65		1070.01		1273.48	6211.9	2010.86	12265.9	1402.4	3615.65	1069.63	8161.11	1604.31
mix5	14156.2		9667.06		7721.87		4345.86	12552	4310	18822.4	4749.14	15780.6	4382.89	13306.1	29419.6
mix6	1882.56		1426.82		1097.19		1115.57	7949.05	2194.35	11676.9	1280.2	6041.39	895.595	9802.44	1627.27
mix7	3075.37		37492.9		10266.4		904.598	5776.5	1899.48	13450.6	1265.9	6129.09	795.94	10208.5	1556.1
mix8	1168.97		988.382		809.398		791.113	6784.35	2769.14	13513.5	862.635	6712.08	1187.19	11251.6	1402.35
mix9	3287.95		1644.83		1857.17		1268.65	5252.02	1787.04	9440.88	1374.98	6619.44	1232.18	9822.12	1732.72
ATP	54641.2		55439		54615.3		49780.5	72084.6	58022.5	72626.2	56801.8	70867.7	47801.4	64718	55972.4
10xnegative	17904		19021.3		20696.4		16039.2	72137.8	20887.5	143743	19401.9	57348.2	30212.7	126042	24433.2
normalize to 10x control
control	0.1		0.1		0.1		0.1	0.1	0.1	0.1	0.1	0.1	0.1	0.1	0.1
mix1	0.158813		0.128054		0.0736471		0.155297	0.055882	0.113911	0.0778094	0.146578	0.0993495	0.0615265	0.0664716	0.114898
mix2	0.133628		0.11012		0.0905398		0.0959428	0.0614357	0.126077	0.0540061	0.0993628	0.104199	0.0503348	0.0624065	0.464167
mix3	0.115071		0.150244		0.0663066		0.0810159	0.097192	0.112843	0.0694907	0.0793624	0.0809555	0.0331592	0.065897	0.355493
mix4	3.68658		0.0766328		0.0517004		0.0793981	0.0861115	0.0962711	0.085332	0.0722816	0.0630473	0.0354032	0.0647489	0.0656613
mix5	0.790672		0.508224		0.373103		0.270952	0.174001	0.206344	0.130945	0.244777	0.275171	0.145068	0.105568	1.20408
mix6	0.105148		0.075012		0.0530135		0.0695528	0.110193	0.105056	0.0812344	0.0659831	0.105346	0.029643	0.0777709	0.0666007
mix7	0.17177		1.9711		0.49605		0.0563992	0.0800759	0.0909389	0.093574	0.0652461	0.106875	0.0263445	0.0809926	0.0636878
mix8	0.0652912		0.0519619		0.0391082		0.0493237	0.0940471	0.132574	0.0940116	0.0444614	0.117041	0.0392943	0.089268	0.0573953
mix9	0.183644		0.0864731		0.0897343		0.079097	0.0728053	0.0855556	0.0656788	0.0708684	0.115426	0.0407835	0.077927	0.0709165
ATP	3.0519		2.91458		2.63888		3.10368	0.999263	2.77786	0.505249	2.92764	1.23574	1.58216	0.513462	2.29084

## Sheet: GPR214-247
	GPR214	GPR214	GPR215	GPR215	GPR216	GPR216	GPR217	GPR217	GPR218	GPR218	GPR219	GPR219	GPR220	GPR220	GPR221	GPR221	GPR222	GPR222	GPR223	GPR223	GPR224	GPR224	GPR225	GPR225	GPR226	GPR226	GPR227	GPR227	GPR228	GPR228	GPR229	GPR229	GPR230	GPR230	GPR231	GPR231	GPR232	GPR232	GPR233	GPR233	GPR234	GPR234	GPR235	GPR235	GPR236	GPR236	GPR237	GPR237	GPR238
negative	1292.99	1948.02	2748.13	2686.58	1906.33	1435.34	2359.19	2132.7	4856.88	2744.58	2527.01	2290.81	2467.88	2664.82	2112.03	3080.56	9575.28	7264.32	7128.61	6049.81	13628.3	15978	16308	15036.8	2434.16	2258.17	1668.71	2355.19	4144.28	6007.06	2061.25	1570.7	5220.07	2758.18	4746.8	4709.33	3545.01	4411.96	4728.04	7149.95	7784.09	8039.46	11027.4	14642.6	17430.8	14465.1	8825.21	10023.4	4406.16
mix1	2625.01	2500.67	3203.65	2748.13	1570.92	1839.47	2272.92	2501.89	6141.88	3664.03	3882.81	2831.93	2971.36	3228.39	3524.84	3486.3	11559.2	11702.2	10948.9	8280.46	14295.1	17138.9	16921.4	11780.9	3225.65	2747.49	3245.32	3862.3	5832.77	5830.84	3145.55	2766.7	5149.12	4355.84	4791.57	5109.38	5408.82	5607.59	5508.09	9724.32	9520.99	11022.9	10702.1	11121.8	16207.4	13873	7460.12	10604.3	4486.02
mix2	1793.89	2370.03	3194.21	3235.73	1504.51	2020.54	1915.85	2185	6015.59	2748.4	4871.65	3812.24	3046.87	3024.44	3438.78	3674.09	6481	9092.37	17268.3	12847	17589.6	20020.4	19251.4	16444	3522.89	3484	2686.67	2507.82	4518.22	6628.42	2588.23	2069.57	2646.58	5054.42	4315.82	5173.17	39536.5	62586.7	6088.63	9451.68	12821	17016.5	8507.14	9422.5	11707.9	12243.4	7991.7	5845.55	6468.96
mix3	2500.72	2086.8	2956.23	2892.19	1798.4	1550.42	1673.96	2335.87	6673	3001.05	3829.33	2783.02	2703.88	2329.98	2941.17	2665.21	12546.5	7552.45	15222.9	9831.15	16178.8	18454.6	16216	13537	2785.71	3183.34	2127.94	2446.78	5211.99	5192.61	2486.57	1869.9	6229.02	4061.14	11465.1	10250.4	43833.3	62622.9	4459.07	8199.98	7187.22	11057	8573.27	10221.6	12230.6	11950.3	6133.67	8376.8	5205.71
mix4	1584.35	2178.79	2568.52	3311.62	2035.06	1519.43	1769.37	1830.07	6439.95	3480.13	44183.2	29109.8	40721.8	38314.5	29770.6	31352.6	38900.9	32437.5	65463.3	47637.8	14819.6	14357.6	17241.8	12746.1	2589.2	2030.12	2369.16	1732.58	4121.14	5316.27	2388.67	1951.41	7677.59	6384.29	4355.08	5173.03	42854.6	44233.1	4954.65	7816.71	19157	24448.9	8663.99	10632.2	9498.1	10649.2	5503.79	6677.58	4776.42
mix5	1928.73	1641.84	2852.94	2790.65	2625.9	2051.57	2153.28	2194.54	4724.3	3595.81	3023.12	3537.02	2351.21	2884.83	3280.62	3477.96	8774.68	7703.56	33788.1	22797.3	17330.8	17010	16441.1	13506.6	2165.03	2880.15	2681.52	2502.91	3395.28	5066.18	1806.77	2105.56	11664.8	12080.9	4916.09	5651.69	45193.7	51171.2	6050.44	9834.55	15040.6	20784	12060	12578.9	15240.6	16232.6	6956.24	8047.37	6383.62
mix6	1875.04	1305	2303.14	2730.88	1264.7	1691.41	1712.74	1712.65	4044.72	2663.12	1538.73	1815.58	2110.58	2051.47	2979.03	2426.81	6601.61	6193.83	30212.4	22925.4	16608.9	15467.4	12673.3	13720.4	2309.02	2229.33	1493.67	1592.09	3304.75	4934.55	1592.12	1414.08	4393.51	3737.53	3876.41	3996.09	42160.5	49275.6	3855.82	7177.55	27758.7	36865.5	8439.79	8718.06	10111.8	7646.42	6495.73	8222.68	3852.93
mix7	2255.88	2335.89	2844.71	1809.51	1767.58	1056.65	2397.35	1504.06	5025.33	2295.96	3047	2275.42	2037.32	2276.82	2336.63	2890.26	6655.98	7192.43	10500.7	6796.18	13688.1	17651.3	15493.6	13116.9	2521.56	2542.49	1211.33	1330.53	2977.84	4984.63	1548.83	1290.59	60778.9	54258.9	4372.42	4298.49	39096.3	48193.1	4846.3	7147.47	6135.29	13479.8	6991.04	11358.5	10840.8	10048.6	4824.38	4050.52	3697.77
mix8	1695.48	1372.39	2886.6	2341.23	1654.9	1150.03	1977.04	1755.41	4737.61	2210.65	1599	1894.62	1973.37	2150.92	2051.79	2013.53	6583.64	6405.12	6305.96	5870.23	9318.29	16675.1	12926.9	12570.5	2261.61	1962.42	1427.75	1467.25	2955.04	3809.48	872.339	635.129	3403.35	3009.16	3322.77	3383.29	3086.12	3325.1	3699.87	7003.47	7332.16	10021.3	7452.28	8086.17	10713.5	7904.65	4840.69	6877.49	2998.25
mix9	1287.55	1869.4	2252.96	1990.67	1347.94	1206.51	2312.83	2152.9	5488.53	3376.28	2725.11	2645.6	1441.83	1973.68	2980.77	3533.61	7378.67	7099.06	10217.3	7338.46	17281	14062.5	18303.9	17693.5	2099.03	2553.74	1247.7	1485.62	3983.08	3485.74	1465.5	1683.38	4162.8	3528.69	3330.1	3291.64	30220.9	39562.9	4322.21	5412.94	8192.19	10353.6	7281.08	6747.91	10172.1	8768.22	5858.82	6213.84	2688.9
ATP	22848.3	20521.7	19612.4	25109.2	23718.4	18693.6	25584.2	25233.3	22259.2	22129.5	24769.8	25588.4	28351.9	26011.4	22521.4	24006.1	28762.4	31097.1	29879.2	25591.4	40709.4	38812.8	43518.1	35620.2	19726.7	16842.7	28294.3	23810	24111.6	28250.3	17378.1	17013.1	31419.9	27518.6	26883.9	25735	22417.9	28355.8	25895.2	39364	23539.8	33234.2	40652.7	51548.9	50284.8	37978.4	23851.3	24744.1	28214.9
10x negativ	12929.9	19480.2	27481.3	26865.8	19063.3	14353.4	23591.9	21327	48568.8	27445.8	25270.1	22908.1	24678.8	26648.2	21120.3	30805.6	95752.8	72643.2	71286.1	60498.1	136283	159780	163080	150368	24341.6	22581.7	16687.1	23551.9	41442.8	60070.6	20612.5	15707	52200.7	27581.8	47468	47093.3	35450.1	44119.6	47280.4	71499.5	77840.9	80394.6	110274	146426	174308	144651	88252.1	100234	44061.6
normalized 10x negativ
negative	0.1	0.1	0.1	0.1	0.1	0.1	0.1	0.1	0.1	0.1	0.1	0.1	0.1	0.1	0.1	0.1	0.1	0.1	0.1	0.1	0.1	0.1	0.1	0.1	0.1	0.1	0.1	0.1	0.1	0.1	0.1	0.1	0.1	0.1	0.1	0.1	0.1	0.1	0.1	0.1	0.1	0.1	0.1	0.1	0.1	0.1	0.1	0.1	0.1
mix1	0.203018	0.12837	0.116576	0.102291	0.0824057	0.128156	0.096343	0.117311	0.126457	0.133501	0.153653	0.123621	0.120401	0.121148	0.166893	0.113171	0.120719	0.161092	0.153591	0.136871	0.104892	0.107266	0.103761	0.0783473	0.132516	0.121669	0.194481	0.163991	0.140743	0.0970666	0.152604	0.176145	0.0986409	0.157925	0.100943	0.108495	0.152575	0.1271	0.116498	0.136005	0.122314	0.137109	0.0970504	0.0759552	0.0929816	0.0959071	0.084532	0.105796	0.101813
mix2	0.138739	0.121664	0.116232	0.12044	0.078922	0.14077	0.0812079	0.102452	0.123857	0.100139	0.192783	0.166414	0.123461	0.113495	0.162819	0.119267	0.0676847	0.125165	0.24224	0.212353	0.129067	0.1253	0.118049	0.109359	0.144727	0.154284	0.161003	0.106481	0.109023	0.110344	0.125566	0.131761	0.0507	0.183252	0.0909207	0.109849	1.11527	1.41857	0.128777	0.132192	0.164708	0.211662	0.0771454	0.0643501	0.0671678	0.0846414	0.0905554	0.0583193	0.146816
mix3	0.193406	0.107124	0.107573	0.107653	0.0943385	0.108017	0.0709548	0.109526	0.137393	0.109344	0.151536	0.121486	0.109563	0.0874349	0.139258	0.0865171	0.13103	0.103966	0.213546	0.162503	0.118714	0.1155	0.0994356	0.0900258	0.114442	0.14097	0.12752	0.103889	0.125764	0.0864418	0.120634	0.119049	0.119328	0.14724	0.241533	0.217662	1.23648	1.41939	0.0943114	0.114686	0.0923322	0.137534	0.0777451	0.0698072	0.0701667	0.082615	0.0695018	0.0835727	0.118146
mix4	0.122534	0.111847	0.0934644	0.123265	0.106753	0.105858	0.0749987	0.0858099	0.132594	0.1268	1.74844	1.27072	1.65007	1.43779	1.40957	1.01776	0.406264	0.446532	0.918318	0.787426	0.108742	0.0898583	0.105726	0.0847656	0.106369	0.089901	0.141976	0.0735647	0.0994416	0.0885004	0.115884	0.124238	0.147078	0.231468	0.0917478	0.109846	1.20887	1.00257	0.104793	0.109325	0.246105	0.304111	0.0785678	0.0726118	0.0544903	0.0736202	0.0623644	0.0666202	0.108403
mix5	0.149168	0.0842826	0.103814	0.103874	0.137747	0.142933	0.0912719	0.1029	0.0972701	0.131015	0.119633	0.1544	0.0952726	0.108256	0.15533	0.1129	0.091639	0.106047	0.473979	0.376826	0.127168	0.106459	0.100816	0.0898235	0.0889436	0.127544	0.160694	0.106272	0.081927	0.0843371	0.0876538	0.134052	0.223461	0.438004	0.103566	0.12001	1.27485	1.15983	0.127969	0.137547	0.193222	0.258525	0.109364	0.0859064	0.0874346	0.112219	0.0788224	0.0802862	0.144879
mix6	0.145015	0.0669909	0.0838077	0.101649	0.0663422	0.11784	0.0725985	0.0803044	0.0832781	0.0970318	0.0608915	0.079255	0.085522	0.0769834	0.14105	0.0787782	0.0689444	0.0852637	0.423818	0.378944	0.121871	0.096804	0.0777123	0.0912455	0.0948591	0.0987229	0.0895103	0.0675994	0.0797424	0.0821458	0.0772406	0.0900284	0.0841658	0.135507	0.0816637	0.0848548	1.18929	1.11687	0.0815524	0.100386	0.356609	0.458557	0.0765347	0.0595392	0.058011	0.0528613	0.0736043	0.0820352	0.0874441
mix7	0.17447	0.119911	0.103515	0.0673538	0.092722	0.0736168	0.101617	0.0705239	0.103468	0.0836543	0.120577	0.099328	0.0825534	0.0854398	0.110634	0.0938226	0.0695122	0.0990104	0.147303	0.112337	0.100439	0.110472	0.0950063	0.0872316	0.103591	0.112591	0.0725908	0.0564934	0.0718543	0.0829795	0.0751405	0.0821666	1.16433	1.9672	0.0921131	0.0912761	1.10285	1.09233	0.102501	0.0999653	0.0788184	0.16767	0.0633969	0.0775721	0.0621936	0.0694678	0.0546658	0.0404108	0.0839227
mix8	0.131128	0.0704505	0.105039	0.0871455	0.0868107	0.0801226	0.0838014	0.0823094	0.0975442	0.0805459	0.0632766	0.0827052	0.0799623	0.0807153	0.0971478	0.0653626	0.0687567	0.0881724	0.0884598	0.0970317	0.0683745	0.104363	0.0792674	0.0835983	0.0929111	0.0869033	0.0855602	0.0622988	0.0713042	0.0634167	0.0423209	0.0404361	0.0651975	0.1091	0.0700002	0.0718423	0.0870552	0.0753657	0.0782538	0.0979513	0.0941943	0.124651	0.0675796	0.0552238	0.0614629	0.0546465	0.0548507	0.0686146	0.0680468
mix9	0.0995792	0.0959643	0.0819814	0.0740969	0.0707088	0.0840573	0.0980346	0.100947	0.113005	0.123016	0.10784	0.115487	0.058424	0.0740642	0.141133	0.114707	0.0770596	0.0977251	0.143328	0.121301	0.126802	0.0880112	0.112239	0.117668	0.086232	0.113089	0.0747703	0.0630787	0.0961103	0.0580275	0.0710977	0.107174	0.0797461	0.127936	0.0701546	0.0698961	0.852491	0.896719	0.0914166	0.075706	0.105243	0.128785	0.0660271	0.0460842	0.0583572	0.0606165	0.0663874	0.0619936	0.0610259
ATP	1.76709	1.05346	0.713665	0.934615	1.2442	1.30238	1.08445	1.18316	0.458303	0.806297	0.980203	1.117	1.14884	0.976104	1.06634	0.779277	0.300382	0.42808	0.419144	0.423011	0.298712	0.242913	0.266851	0.236887	0.810412	0.745856	1.69558	1.01096	0.581806	0.470285	0.843086	1.08316	0.601907	0.997712	0.566358	0.546468	0.632379	0.642702	0.547696	0.550549	0.302409	0.413388	0.368651	0.352048	0.288482	0.262553	0.270263	0.246864	0.640352
[truncated: 19 more columns]
