# Supplementary material for: Large-scale deorphanization of Nematostella vectensis neuropeptide G protein-coupled receptors supports the independent expansion of bilaterian and cnidarian peptidergic systems
Source: eLife. 2024 May 10;12:RP90674. doi: 10.7554/eLife.90674 (PMC11087051; doi:10.7554/eLife.90674)
Supplement: Supplementary file 5. — The file contains a list of the transcriptomes used in this study, together with the sources and data from the BUSCO analysis including completeness of the transcriptomes with percentage of single, double, fragmented, and missing genes. [file elife-90674-supp5.xlsx]

## Sheet: Summary_BUSCOSformated
					Completenes	Singles	Doubles	Fragmented	Missing	BUSCOS	comment
Bilateria	Craniata	Petromyzon marinus	UniProt (UP000245300)	Pmar	54.5	52.9	1.6	9.8	35.7	n:255
Bilateria	Craniata	Homo sapiens	UniProt (UP000005640)	Hsap	100	97.6	2.4	0	0	n:255
Bilateria	Hemichordata	Saccoglossus kowalevskii	https://groups.oist.jp/molgenu/hemichordate-genomes	Skow	94.1	91.4	2.7	3.5	2.4	n:255
Bilateria	Ecdysozoa	Drosophila melanogaster	UniProt (UP000000803)	Dmel	100	99.6	0.4	0	0	n:255
Bilateria	Ecdysozoa	Caenorhabditis elegans	UniProt (UP000001940)	Cele	97.7	96.9	0.8	0.8	1.5	n:255
Bilateria	Spiralia	Platynereis dumerilii	Jekely’s lab transcriptome	Pdum	90.6	87.5	3.1	5.5	3.9	n:255
Cnidaria	Cubozoa	Alatina Alata	https://bitbucket.org/caseywdunn/cnidaria2014-assemblies/src/master/Cnidaria_Transcriptomes/	Aala	96.5	76.5	20	2.4	1.1	n:255
Cnidaria	Hydrozoa	Clytia hemisphaerica	http://marimba.obs-vlfr.fr/organism/Clytia/hemisphaerica	Chem	91.8	56.5	35.3	5.5	2.7	n:255
Cnidaria	Octocoralia	Corallium_rubrum	http://data.centrescientifique.mc/crubrum_data.html	Crub	89.8	56.5	33.3	4.7	5.5	n:255
Cnidaria	Hydrozoa	Hydra_vulgaris_AEP	https://research.nhgri.nih.gov/HydraAEP/download/index.cgi?dl=pm	Hvul	97.3	96.1	1.2	1.6	1.1	n:255
Cnidaria	Hexacoralia	Exaiptasia pallida	http://aiptasia.reefgenomics.org/	Epal	85.9	77.3	8.6	10.2	3.9	n:255
Cnidaria	Hexacoralia	Nematostella vectensis	combined N. vectensis transcriptomes 1-4 (cdhit 0.85)	Nvec	99.2	88.6	10.6	0.8	0	n:255
Cnidaria	Hexacoralia	Nematostella vectensis	http://metazoa.ensembl.org/species.html	Nvec	93.4	91.4	2	5.5	1.1	n:255	transcriptome 1
Cnidaria	Hexacoralia	Nematostella vectensis	https://darchive.mblwhoilibrary.org/handle/1912/5613	Nvec	93.7	85.9	7.8	5.9	0.4	n:255	transcriptome 2 (embryonic)
Cnidaria	Hexacoralia	Nematostella vectensis	https://simrbase.stowers.org/starletseaanemone	Nvec	82.8	81.6	1.2	15.7	1.5	n:255	transcriptome 3 (Vienna NVE transcripts)
Cnidaria	Hexacoralia	Nematostella vectensis	https://simrbase.stowers.org/starletseaanemone	Nvec	93.7	92.9	0.8	3.5	2.8	n:255	transcriptome 4 (NVEC200 gene models)
Cnidaria	Polypodium	Polypodium hydriforme	https://www.ncbi.nlm.nih.gov/nuccore/671211599	Phyd	78.4	13.7	64.7	14.5	7.1	n:255
Cnidaria	Scyphozoa	Rhopilema_esculentum	https://academic.oup.com/gigascience/article/9/4/giaa036/5823175	Resc	98.1	62.4	35.7	1.2	0.7	n:255
Cnidaria	Staurozoa	Calvadosia cruxmelitensis	https://github.com/josephryan/Ohdera_et_al_2018/tree/master/AA_Files	Ccrux	80	64.7	15.3	14.9	5.1	n:255
Placozoa	Trichoplacidae	Hoilungia hongkongensis	https://bitbucket.org/molpalmuc/hoilungia-genome/src/master/sequences/Hhon_TRINITY_transdecoder_proteins.fasta.gz	Hhon	92.9	89	3.9	2.4	4.7	n:255
Placozoa	Trichoplacidae	Trichoplax adhaerens	Adrianos Senatore Database	Tadh	99.2	98.8	0.4	0.4	0.4	n:255
Ctenophora	Lobata	Mnemiopsis leidyi	https://research.nhgri.nih.gov/mnemiopsis/download/download.cgi?dl=transcript	Mley	89.8	83.5	6.3	5.1	5.1	n:255
Ctenophora	Cydippida	Pleurobrachia_bachei	https://neurobase.rc.ufl.edu/pleurobrachia/download	Pbac	79.6	30.2	49.4	13.7	6.7	n:255
Ctenophora	Cydippida	Hormiphora californiensis	https://www.ncbi.nlm.nih.gov/pmc/articles/PMC8527503/	Hcal	94.9	39.6	55.3	1.6	3.5	n:255
Porifera	Demospongiae	Amphimedon queenslandica	UniProt (UP000007879)	Aque	92.5	88.2	4.3	7.1	0.4	n:255
Porifera	Demospongiae	Ephydatia muelleri	https://spaces.facsci.ualberta.ca/ephybase/	Emul	97.3	81.2	16.1	1.6	1.1	n:255
Porifera	Homoscleromorpha	Oscarella carmela	COMPAGEN	Ocar	95.3	87.1	8.2	2.7	2	n:255
Porifera	Calcarea	Sycon ciliatum	COMPAGEN	Scil	97.3	91	6.3	2	0.7	n:255
Porifera	Demospongiae	Tethya wilhelma	https://www.biorxiv.org/content/10.1101/120998v3	Twil	96.1	62.4	33.7	1.2	2.7	n:255
Non-metazoans
Filasterea		Capsaspora owczarzaki	UniProt (UP000008743)	Cowc	93.7	92.9	0.8	2.4	3.9	n:255
Filasterea-related	position debated	Tunicaraptor unikontum	NCBI (PRJNA638967)	Tuni	74.1	64.7	9.4	16.5	9.4	n:255
Choanoflagellatea	Salpingoecidae	Monosiga_brevicolis	UniProt (UP000001357)	Mbre	78.8	78.8	0	7.5	13.7	n:255
Choanoflagellatea	Salpingoecidae	Salpingoeca rosetta	UniProt (UP000007799)	Sros	83.1	83.1	0	6.7	10.2	n:255
