# Supplementary material for: Large-scale deorphanization of Nematostella vectensis neuropeptide G protein-coupled receptors supports the independent expansion of bilaterian and cnidarian peptidergic systems
Source: eLife. 2024 May 10;12:RP90674. doi: 10.7554/eLife.90674 (PMC11087051; doi:10.7554/eLife.90674)

GPR: Ligand & Receptors

Development Subset | Cell types

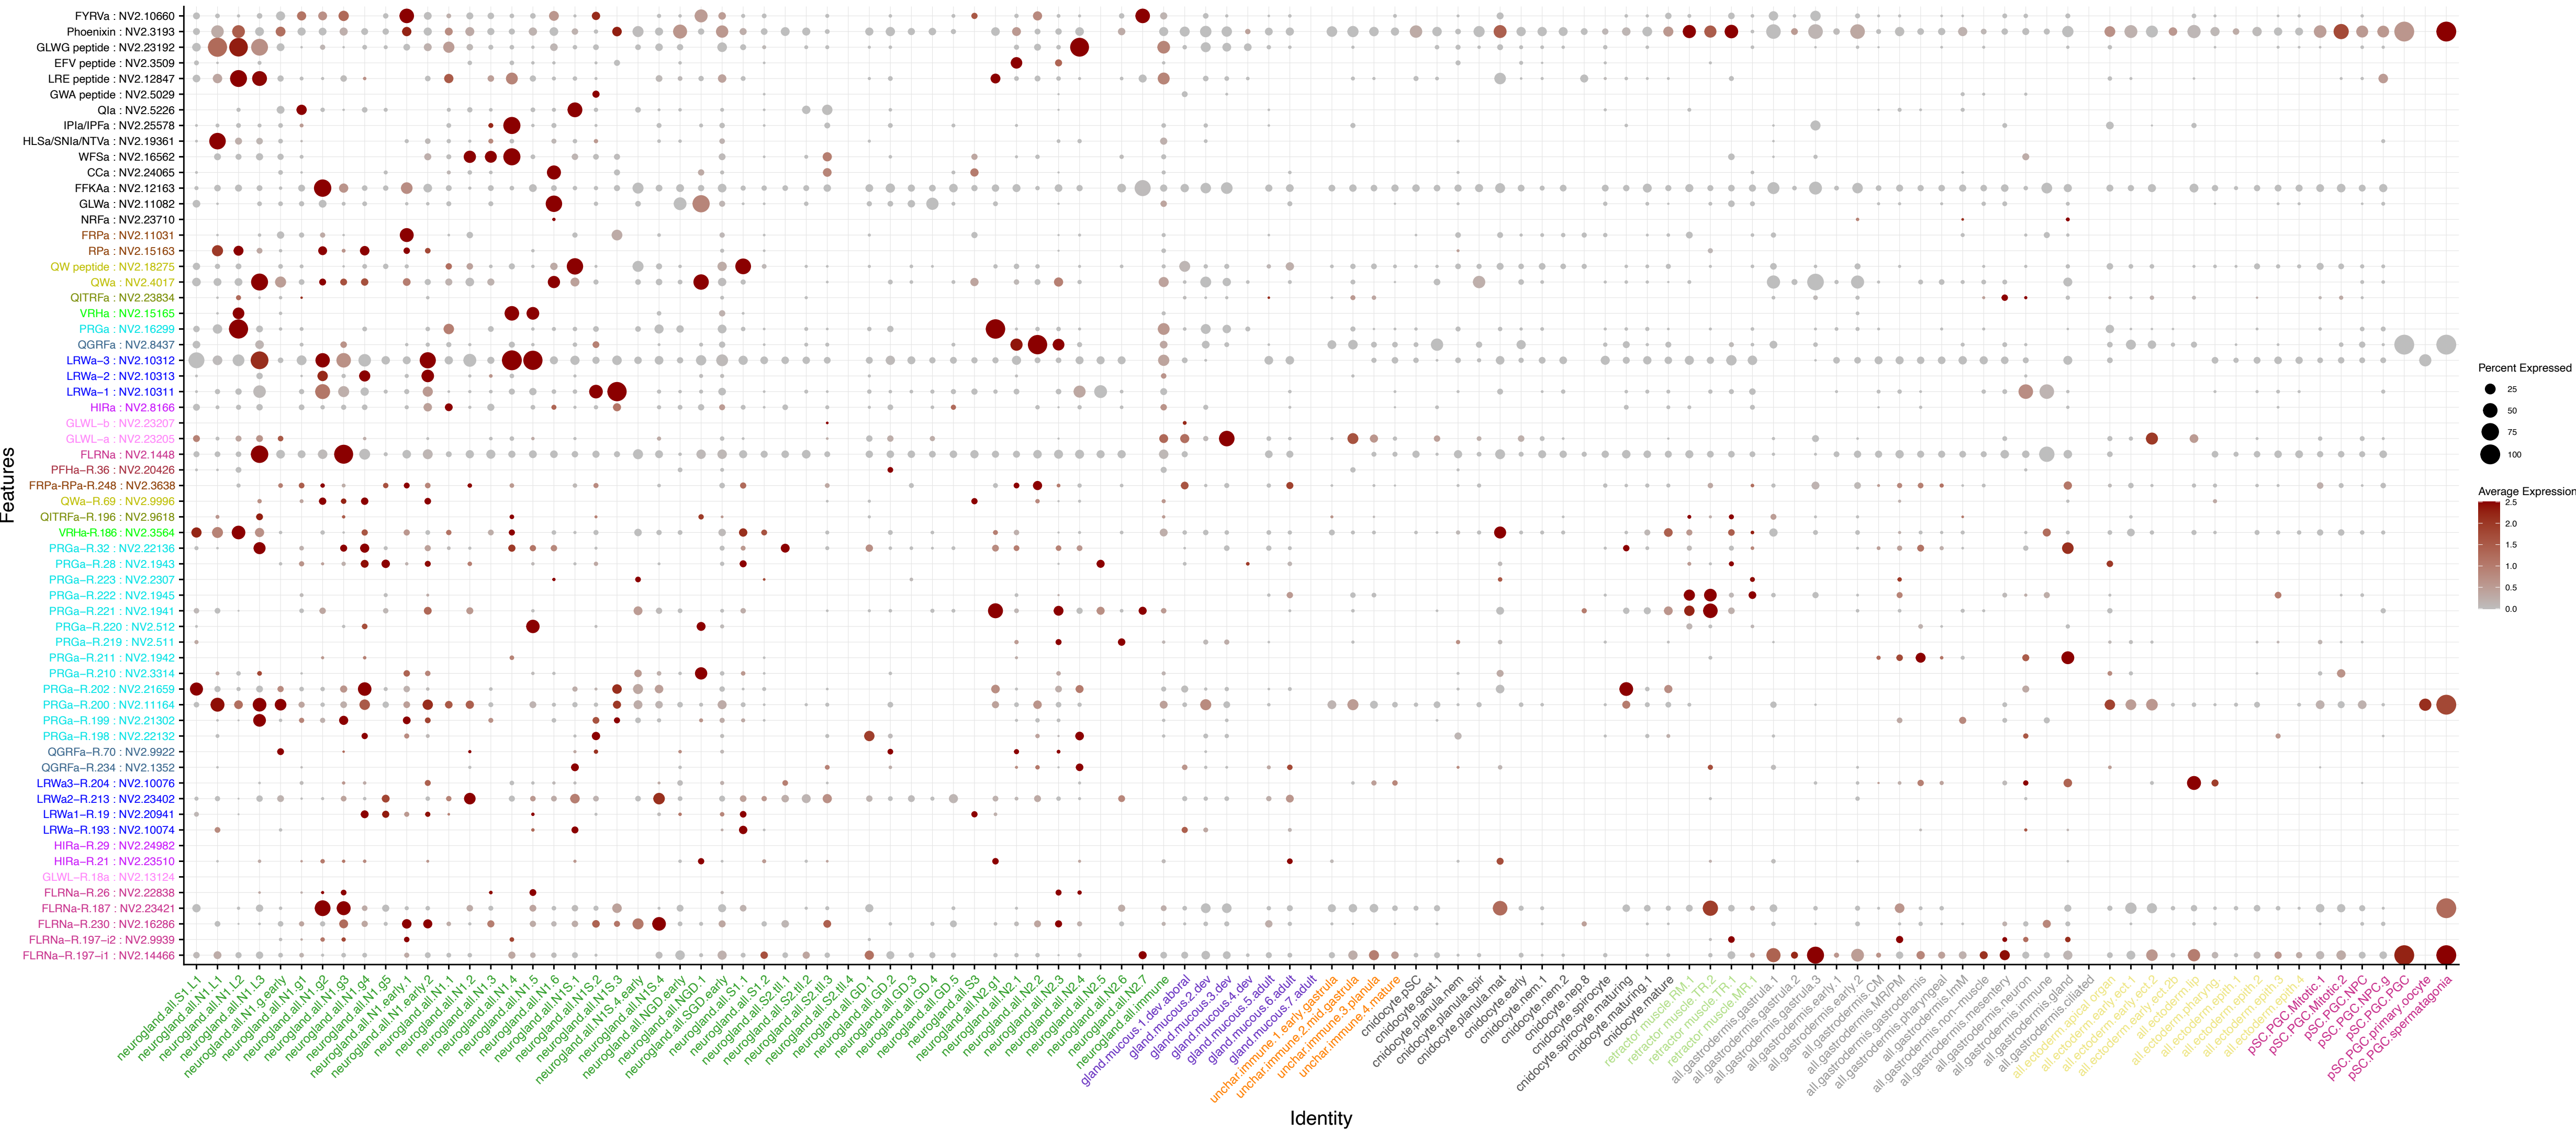

GPR: Ligand & Receptors

Adult Subset | Cell types

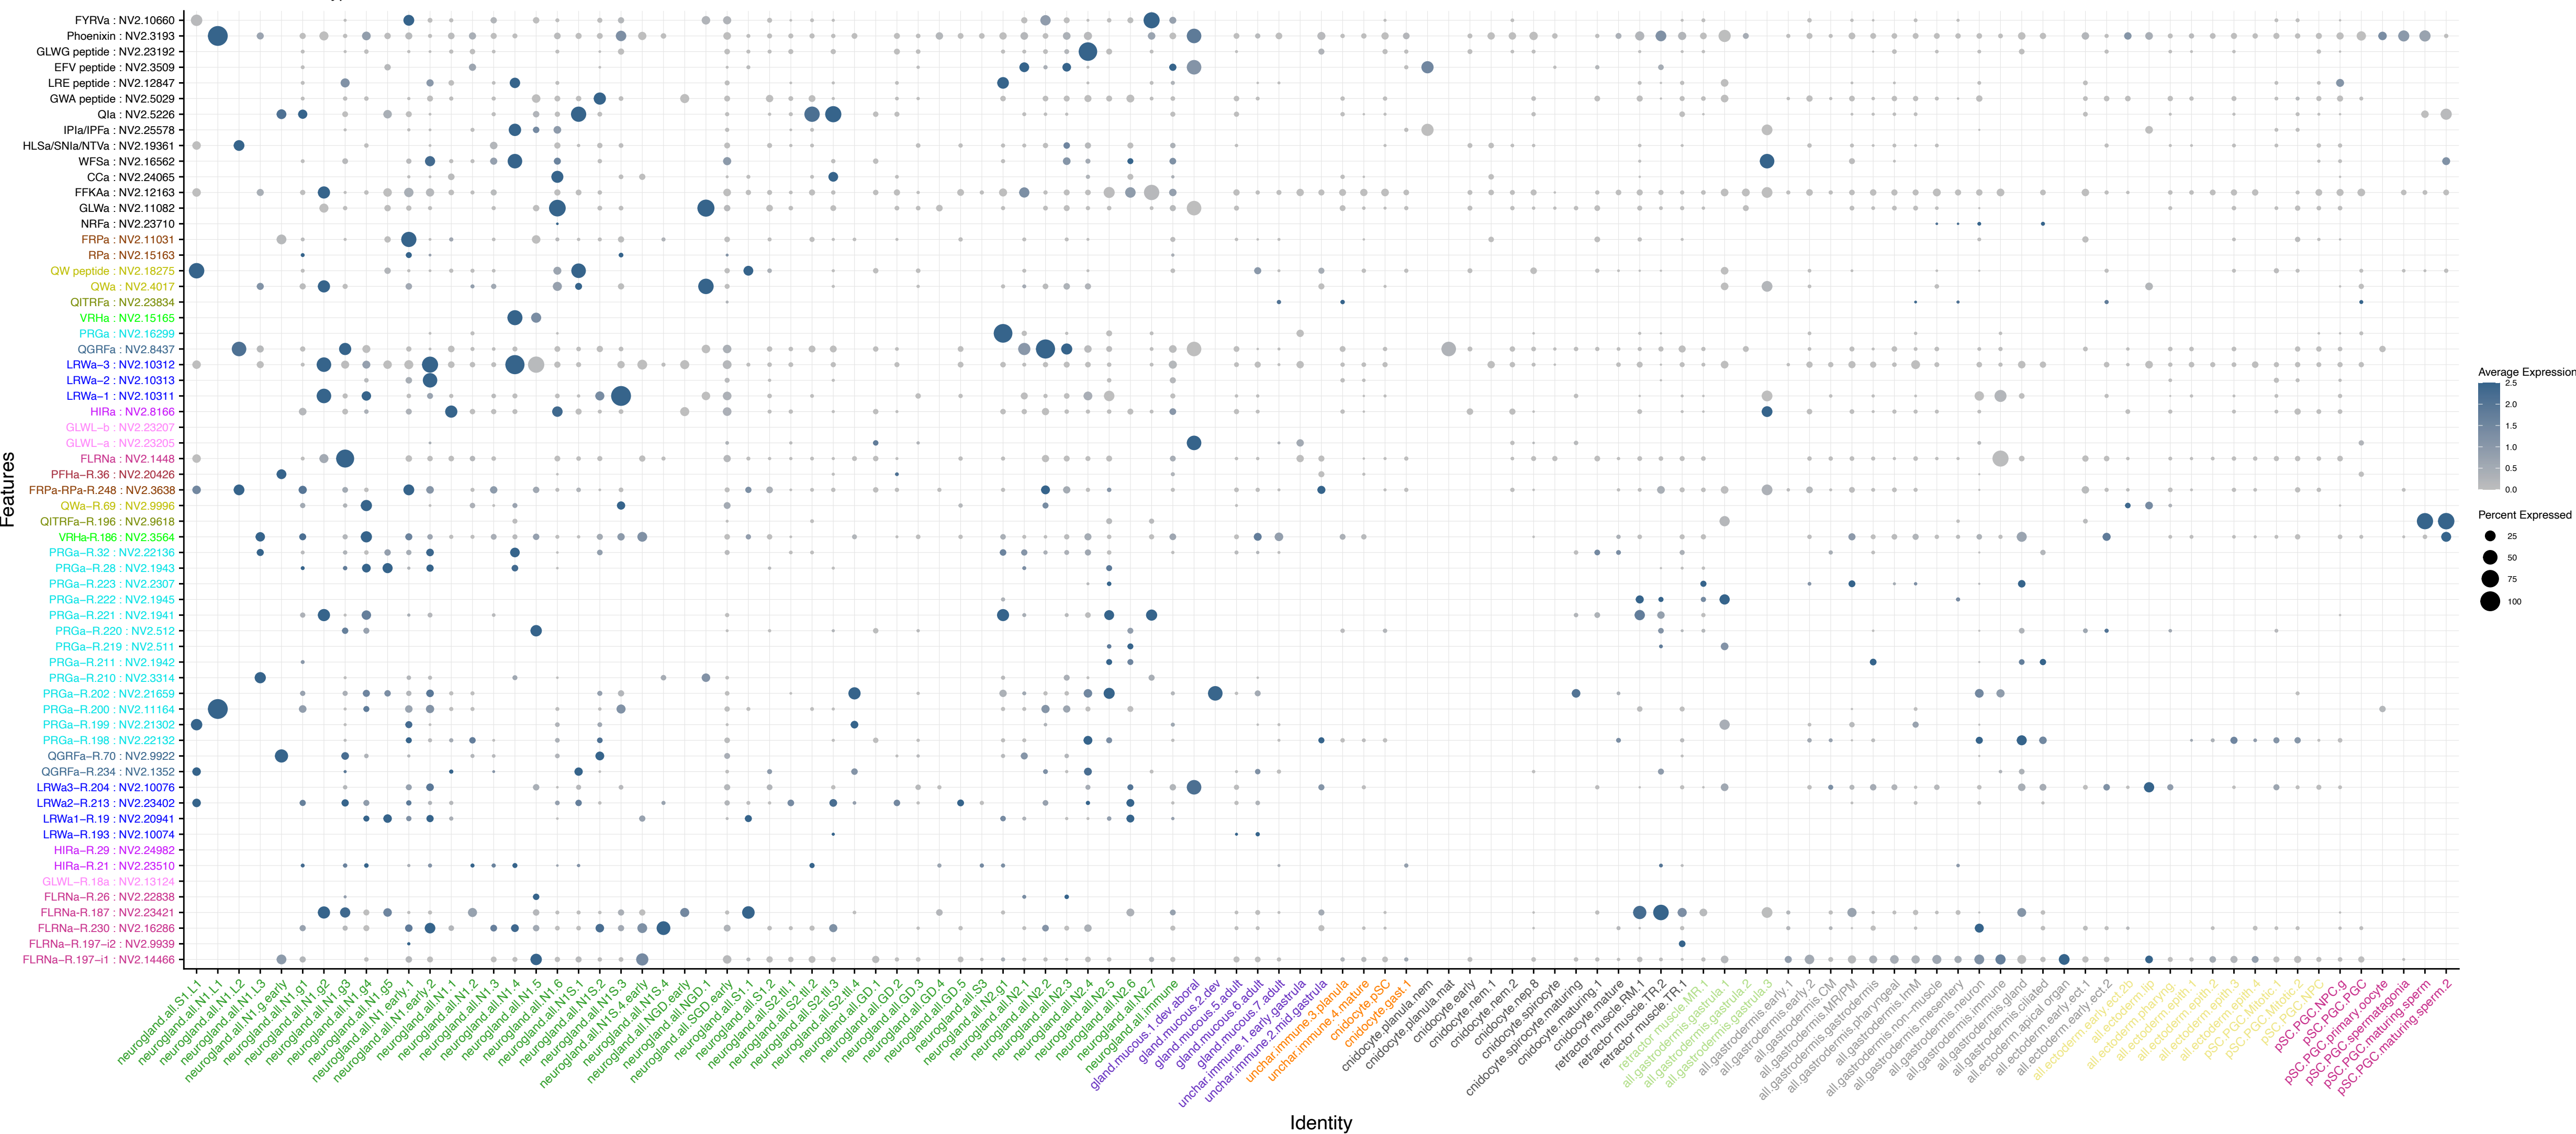

Supplement: Supplementary file 12. — The file contains the detailed dotplots of Figure 5 with cell-type resolution of the developmental and the adult single-cell dataset. [file elife-90674-supp12.pdf]
